# Supplementary material for: Pleiotropic associations of heterozygosity for the SERPINA1 Z allele in the UK Biobank
Source: PubMed Central journal article supplement (PMC8107350; doi:10.1183/23120541.00049-2021), 2021-05-10
Supplement: 00049-2021.TableS1.pdf [file 00049-2021.TableS1.pdf]

**Table S1. Frequency of the *SERPINA1* Z allele in 411,002 unrelated European UK Biobank participants**

| Sex           | Smoking status | Age group   | MM          | MZ     | ZZ   | N      | M        | Z        | O(MM)    | E(MM)    | O(MZ)    | E(MZ)    | O(ZZ)    | E(ZZ)    | Chi-squared | P            |              |
|---------------|----------------|-------------|-------------|--------|------|--------|----------|----------|----------|----------|----------|----------|----------|----------|-------------|--------------|--------------|
| All           | All            | All         | 394674      | 16199  | 129  | 411002 | 0.979979 | 0.020021 | 394674   | 394709.7 | 16199    | 16127.52 | 129      | 164.7394 | 8.073513332 | <b>0.004</b> |              |
|               | Ever-smokers   | All         | 180774      | 7264   | 47   | 188085 | 0.98044  | 0.01956  | 180774   | 180799   | 7264     | 7214.075 | 47       | 71.96236 | 9.007913227 | <b>0.003</b> |              |
|               | Never-smokers  | All         | 213900      | 8935   | 82   | 222917 | 0.979591 | 0.020409 | 213900   | 213910.9 | 8935     | 8913.299 | 82       | 92.85048 | 1.321368824 | 0.250        |              |
|               | All            | All         | 40-59 years | 219339 | 8852 | 76     | 228267   | 0.980277 | 0.019723 | 219339   | 219351.8 | 8852     | 8826.418 | 76       | 88.79078    | 1.917466848  | 0.166        |
|               |                |             | 60+ years   | 175335 | 7347 | 53     | 182735   | 0.979607 | 0.020393 | 175335   | 175358   | 7347     | 7301.012 | 53       | 75.99421    | 7.2502453    | <b>0.007</b> |
|               | Ever-smokers   | All         | 40-59 years | 92580  | 3664 | 23     | 96267    | 0.980731 | 0.019269 | 92580    | 92592.74 | 3664     | 3638.511 | 23       | 35.7446     | 4.724351694  | 0.030        |
|               |                |             | 60+ years   | 88194  | 3600 | 24     | 91818    | 0.980135 | 0.019865 | 88194    | 88206.23 | 3600     | 3575.531 | 24       | 36.23446    | 4.300080537  | 0.038        |
|               | Never-smokers  | All         | 40-59 years | 126759 | 5188 | 53     | 132000   | 0.979947 | 0.020053 | 126759   | 126759.1 | 5188     | 5187.839 | 53       | 53.08037    | 0.000126725  | 0.991        |
|               |                |             | 60+ years   | 87141  | 3747 | 29     | 90917    | 0.979074 | 0.020926 | 87141    | 87151.81 | 3747     | 3725.378 | 29       | 39.81111    | 3.06270122   | 0.080        |
|               | Males          | All         | All         | 182549 | 7409 | 64     | 190022   | 0.980168 | 0.019832 | 182549   | 182559.7 | 7409     | 7387.527 | 64       | 74.73657    | 1.605449841  | 0.205        |
| Ever-smokers  |                | All         | 96014       | 3850   | 26   | 99890  | 0.980469 | 0.019531 | 96014    | 96026.11 | 3850     | 3825.788 | 26       | 38.10593 | 4.000702309 | 0.045        |              |
| Never-smokers |                | All         | 86535       | 3559   | 38   | 90132  | 0.979835 | 0.020165 | 86535    | 86533.65 | 3559     | 3561.701 | 38       | 36.64965 | 0.051822323 | 0.820        |              |
| All           |                | All         | 40-59 years | 98442  | 3880 | 33     | 102355   | 0.980724 | 0.019276 | 98442    | 98447.03 | 3880     | 3869.937 | 33       | 38.03164    | 0.6921198    | 0.405        |
|               |                |             | 60+ years   | 84107  | 3529 | 31     | 87667    | 0.979519 | 0.020481 | 84107    | 84112.77 | 3529     | 3517.453 | 31       | 36.77348    | 0.944743965  | 0.331        |
| Females       | All            | All         | 212125      | 8790   | 65   | 220980 | 0.979817 | 0.020183 | 212125   | 212150   | 8790     | 8739.969 | 65       | 90.01539 | 7.241150451 | <b>0.007</b> |              |
|               | Ever-smokers   | All         | 84760       | 3414   | 21   | 88195  | 0.980407 | 0.019593 | 84760    | 84772.86 | 3414     | 3388.287 | 21       | 33.85661 | 5.079217263 | <b>0.024</b> |              |
|               | Never-smokers  | All         | 127365      | 5376   | 44   | 132785 | 0.979425 | 0.020575 | 127365   | 127377.2 | 5376     | 5351.58  | 44       | 56.20984 | 2.764808602 | 0.096        |              |
|               | All            | All         | 40-59 years | 120897 | 4972 | 43     | 125912   | 0.979915 | 0.020085 | 120897   | 120904.8 | 4972     | 4956.408 | 43       | 50.79612    | 1.246091786  | 0.264        |
|               |                |             | 60+ years   | 91228  | 3818 | 22     | 95068    | 0.979688 | 0.020312 | 91228    | 91245.22 | 3818     | 3783.556 | 22       | 39.22204    | 7.878858049  | <b>0.005</b> |
| Males         | Ever-smokers   | 40-59 years | 45844       | 1762   | 9    | 47615  | 0.981308 | 0.018692 | 45844    | 45851.64 | 1762     | 1746.729 | 9        | 16.63551 | 3.639395806 | 0.056        |              |
|               |                | 60+ years   | 50170       | 2088   | 17   | 52275  | 0.979703 | 0.020297 | 50170    | 50174.53 | 2088     | 2078.931 | 17       | 21.5346  | 0.994835197 | 0.319        |              |
|               | Never-smokers  | 40-59 years | 52598       | 2118   | 24   | 54740  | 0.980216 | 0.019784 | 52598    | 52595.43 | 2118     | 2123.147 | 24       | 21.42654 | 0.321690548 | 0.571        |              |
|               |                | 60+ years   | 33937       | 1441   | 14   | 35392  | 0.979247 | 0.020753 | 33937    | 33938.24 | 1441     | 1438.513 | 14       | 15.24328 | 0.105749132 | 0.745        |              |
| Females       | Ever-smokers   | 40-59 years | 46736       | 1902   | 14   | 48652  | 0.980165 | 0.019835 | 46736    | 46741.14 | 1902     | 1891.719 | 14       | 19.14053 | 1.437020728 | 0.231        |              |
|               |                | 60+ years   | 38024       | 1512   | 7    | 39543  | 0.980705 | 0.019295 | 38024    | 38031.72 | 1512     | 1496.555 | 7        | 14.72243 | 4.211647147 | 0.040        |              |
|               | Never-smokers  | 40-59 years | 74161       | 3070   | 29   | 77260  | 0.979757 | 0.020243 | 74161    | 74163.66 | 3070     | 3064.679 | 29       | 31.66057 | 0.232914036 | 0.629        |              |
|               |                | 60+ years   | 53204       | 2306   | 15   | 55525  | 0.978964 | 0.021036 | 53204    | 53213.57 | 2306     | 2286.861 | 15       | 24.56955 | 3.88912281  | 0.049        |              |
