# Supplementary material for: Pleiotropic associations of heterozygosity for the SERPINA1 Z allele in the UK Biobank
Source: PubMed Central journal article supplement (PMC8107350; doi:10.1183/23120541.00049-2021), 2021-05-10
Supplement: 00049-2021.TableS2.pdf [file 00049-2021.TableS2.pdf]

Table S2. Phenome-wide association study results for *SERPINA1* Z allele heterozygosity in UK Biobank

| Category                  | Phenotype                                                               | Effect allele | N      | Cases  | Controls | OR    | Beta     | SE       | L95      | U95      | P        | FDR      |
|---------------------------|-------------------------------------------------------------------------|---------------|--------|--------|----------|-------|----------|----------|----------|----------|----------|----------|
| Anthropometry             | Standing height                                                         | T             | 378103 | NA     | NA       | NA    | 0.154838 | 0.008263 | 0.138642 | 0.171034 | 2.42E-78 | 5.84E-75 |
| Operations and Procedures | Gall bladder removal (self-reported)                                    | T             | 378957 | 14872  | 364229   | 1.51  | 0.412834 | 0.036632 | 1.41     | 1.62     | 1.85E-29 | 2.23E-26 |
| Respiratory               | Alpha1 antitrypsin deficiency (HES and self-reported)                   | T             | 378957 | 223    | 378878   | 5.82  | 1.76184  | 0.176835 | 4.12     | 8.24     | 2.21E-23 | 1.77E-20 |
| Biological assays         | High light scatter reticulocyte percentage                              | T             | 361631 | NA     | NA       | NA    | -0.07962 | 0.008511 | -0.0963  | -0.06293 | 8.41E-21 | 5.07E-18 |
| Biological assays         | High light scatter reticulocyte count                                   | T             | 361630 | NA     | NA       | NA    | -0.07841 | 0.008514 | -0.0951  | -0.06173 | 3.26E-20 | 1.57E-17 |
| Biological assays         | Reticulocyte percentage                                                 | T             | 361630 | NA     | NA       | NA    | -0.07775 | 0.008515 | -0.09443 | -0.06106 | 6.82E-20 | 2.74E-17 |
| Respiratory               | FVC maximumValue                                                        | T             | 286064 | NA     | NA       | NA    | 0.086208 | 0.009563 | 0.067463 | 0.104952 | 1.98E-19 | 6.82E-17 |
| Biological assays         | Reticulocyte count                                                      | T             | 361630 | NA     | NA       | NA    | -0.07516 | 0.008517 | -0.09185 | -0.05847 | 1.09E-18 | 3.29E-16 |
| Respiratory               | FVC maximumValue strict*                                                | T             | 221584 | NA     | NA       | NA    | 0.092784 | 0.010876 | 0.071467 | 0.114101 | 1.45E-17 | 3.88E-15 |
| Respiratory               | FEV1 maximumValue                                                       | T             | 286064 | NA     | NA       | NA    | 0.079709 | 0.009571 | 0.06095  | 0.098468 | 8.21E-17 | 1.98E-14 |
| Digestive system          | Gall stones (HES and self-reported)                                     | T             | 378957 | 16555  | 362546   | 1.35  | 0.298659 | 0.036235 | 1.26     | 1.45     | 1.69E-16 | 3.70E-14 |
| Respiratory               | FEV1 maximumValue strict                                                | T             | 221584 | NA     | NA       | NA    | 0.088488 | 0.010886 | 0.067152 | 0.109823 | 4.33E-16 | 8.70E-14 |
| Respiratory               | PEF maximumValue                                                        | T             | 286064 | NA     | NA       | NA    | 0.073969 | 0.009581 | 0.055189 | 0.092748 | 1.16E-14 | 2.15E-12 |
| Family history            | Heart disease (family history)                                          | T             | 378957 | NA     | NA       | NA    | -0.06269 | 0.008312 | -0.07898 | -0.0464  | 4.63E-14 | 7.96E-12 |
| Respiratory               | PEF maximumValue strict                                                 | T             | 221584 | NA     | NA       | NA    | 0.077439 | 0.0109   | 0.056074 | 0.098803 | 1.21E-12 | 1.94E-10 |
| Family history            | Chronic bronchitis emphysema (family history - father)                  | T             | 343458 | 37574  | 306018   | 1.19  | 0.176499 | 0.026529 | 1.13     | 1.26     | 2.87E-11 | 4.32E-09 |
| Anthropometry             | Whole body fat free mass                                                | T             | 372298 | NA     | NA       | NA    | 0.055154 | 0.008368 | 0.038752 | 0.071555 | 4.37E-11 | 6.19E-09 |
| Anthropometry             | Whole body water mass                                                   | T             | 372328 | NA     | NA       | NA    | 0.055014 | 0.008368 | 0.038611 | 0.071416 | 4.90E-11 | 6.54E-09 |
| Respiratory               | FEV1 never smoked only                                                  | T             | 109805 | NA     | NA       | NA    | 0.10136  | 0.015436 | 0.071105 | 0.131615 | 5.16E-11 | 6.54E-09 |
| Cardiovascular            | Systolic blood pressure mean                                            | T             | 357107 | NA     | NA       | NA    | -0.05519 | 0.008538 | -0.07192 | -0.03846 | 1.02E-10 | 1.23E-08 |
| Metabolic                 | Other metabolic disorders (HES)                                         | T             | 378957 | 309    | 378792   | 3.18  | 1.15769  | 0.182869 | 2.22     | 4.55     | 2.44E-10 | 2.80E-08 |
| Respiratory               | FEV1 never smoked only strict                                           | T             | 84245  | NA     | NA       | NA    | 0.11129  | 0.017603 | 0.076789 | 0.145791 | 2.58E-10 | 2.82E-08 |
| Cardiovascular            | Diastolic blood pressure mean                                           | T             | 357110 | NA     | NA       | NA    | -0.05215 | 0.008539 | -0.06889 | -0.03541 | 1.01E-09 | 1.06E-07 |
| Biological assays         | Immature reticulocyte fraction                                          | T             | 361630 | NA     | NA       | NA    | -0.05186 | 0.008503 | -0.06852 | -0.03519 | 1.07E-09 | 1.07E-07 |
| Family history            | Heart disease (family history - father)                                 | T             | 343458 | 109130 | 234462   | 0.89  | -0.11598 | 0.019175 | 0.858    | 0.925    | 1.46E-09 | 1.41E-07 |
| Summary                   | Disorders of gallbladder biliary tract and pancreas (HES)               | T             | 378957 | 16365  | 362736   | 1.25  | 0.220686 | 0.037509 | 1.16     | 1.34     | 4.02E-09 | 3.72E-07 |
| Neurosciences             | Headache                                                                | T             | 378957 | 81591  | 296640   | 1.12  | 0.116486 | 0.019992 | 1.08     | 1.17     | 5.66E-09 | 5.05E-07 |
| Respiratory               | FEV1 ever smoked only                                                   | T             | 175212 | NA     | NA       | NA    | 0.069583 | 0.012235 | 0.045603 | 0.093562 | 1.29E-08 | 1.11E-06 |
| Respiratory               | FEV1 ever smoked only strict                                            | T             | 136671 | NA     | NA       | NA    | 0.07772  | 0.013884 | 0.050508 | 0.104932 | 2.17E-08 | 1.80E-06 |
| Neurosciences             | Headaches for 3 months vs no pain                                       | T             | 330405 | 33891  | 296640   | 1.17  | 0.154784 | 0.02832  | 1.1      | 1.23     | 4.61E-08 | 3.71E-06 |
| Digestive system          | Bile duct disease (HES and self-reported)                               | T             | 378957 | 13856  | 365245   | 1.25  | 0.220425 | 0.040543 | 1.15     | 1.35     | 5.42E-08 | 4.21E-06 |
| Genitourinary             | Enlarged prostate (HES and self-reported)                               | T             | 378957 | 13062  | 366039   | 1.26  | 0.228012 | 0.043815 | 1.15     | 1.37     | 1.95E-07 | 1.47E-05 |
| Musculoskeletal           | Grip strength maximumValue                                              | T             | 378178 | NA     | NA       | NA    | 0.041545 | 0.008305 | 0.025266 | 0.057824 | 5.67E-07 | 4.14E-05 |
| Digestive system          | Cholelithiasis (HES)                                                    | T             | 378957 | 12988  | 366113   | 1.23  | 0.209588 | 0.041986 | 1.14     | 1.34     | 5.98E-07 | 4.24E-05 |
| Anthropometry             | Weight                                                                  | T             | 377835 | NA     | NA       | NA    | 0.040666 | 0.008326 | 0.02434  | 0.05698  | 1.04E-06 | 7.18E-05 |
| Musculoskeletal           | Osteoarthritis knee or hip                                              | T             | 339483 | 27422  | 312194   | 0.845 | -0.16799 | 0.03457  | 0.79     | 0.905    | 1.18E-06 | 7.88E-05 |
| Family history            | Heart disease (family history - mother)                                 | T             | 357389 | 69487  | 288042   | 0.898 | -0.10794 | 0.022461 | 0.859    | 0.938    | 1.54E-06 | 9.94E-05 |
| Digestive system          | Gall bladder disease (HES and self-reported)                            | T             | 378957 | 13958  | 365143   | 1.22  | 0.195992 | 0.040812 | 1.12     | 1.32     | 1.57E-06 | 9.94E-05 |
| Operations and Procedures | Saphenous vein graft replacement of coronary artery                     | T             | 378957 | 3223   | 375878   | 0.582 | -0.54089 | 0.116223 | 0.464    | 0.731    | 3.26E-06 | 0.000201 |
| Summary                   | Arthritis (HES)                                                         | T             | 378957 | 40307  | 338794   | 0.876 | -0.13213 | 0.02855  | 0.829    | 0.927    | 3.69E-06 | 0.000217 |
| Respiratory               | Emphysema (HES)                                                         | T             | 378957 | 1571   | 375300   | 1.63  | 0.48683  | 0.105085 | 1.32     | 2        | 3.61E-06 | 0.000217 |
| Operations and Procedures | Connection of thoracic artery to coronary artery                        | T             | 378957 | 3408   | 375693   | 0.607 | -0.49966 | 0.110758 | 0.488    | 0.754    | 3.66E-06 | 0.000365 |
| Cardiovascular            | Chronic ischaemic heart disease (HES)                                   | T             | 378957 | 22951  | 356150   | 0.842 | -0.17163 | 0.038103 | 0.782    | 0.908    | 6.66E-06 | 0.000373 |
| Respiratory               | Emphysema (HES and self-reported)                                       | T             | 378957 | 1662   | 377439   | 1.58  | 0.458595 | 0.103436 | 1.29     | 1.94     | 9.27E-06 | 0.000507 |
| Musculoskeletal           | Carpal tunnel syndrome (HES and self-reported)                          | T             | 378957 | 9101   | 370000   | 0.764 | -0.26947 | 0.060982 | 0.678    | 0.861    | 9.92E-06 | 0.000531 |
| Family history            | Diabetes (family history - mother)                                      | T             | 357389 | 32382  | 325147   | 0.871 | -0.1384  | 0.031439 | 0.819    | 0.926    | 1.07E-05 | 0.000562 |
| Musculoskeletal           | Arthritis nos (HES and self-reported)                                   | T             | 378957 | 13143  | 365958   | 0.804 | -0.21859 | 0.05     | 0.729    | 0.886    | 1.23E-05 | 0.000631 |
| Cardiovascular            | Heartcardiac problem (HES and self-reported)                            | T             | 378957 | 25675  | 353426   | 0.855 | -0.15622 | 0.035911 | 0.797    | 0.918    | 1.36E-05 | 0.000683 |
| Musculoskeletal           | BMD Combined                                                            | T             | 338046 | NA     | NA       | NA    | -0.03816 | 0.008784 | -0.05337 | -0.02094 | 1.40E-05 | 0.000689 |
| Operations and Procedures | Release of entrapment of peripheral nerve at wrist                      | T             | 378957 | 8745   | 370356   | 0.765 | -0.26734 | 0.06217  | 0.678    | 0.865    | 1.71E-05 | 0.000822 |
| Family history            | Chronic bronchitis emphysema (family history - mother)                  | T             | 357389 | 20553  | 336976   | 1.16  | 0.145529 | 0.0349   | 1.08     | 1.24     | 3.05E-05 | 0.00144  |
| Medication                | Drugs used in benign prostatic hypertrophy                              | T             | 378957 | 6797   | 372304   | 1.26  | 0.231243 | 0.057487 | 1.13     | 1.41     | 5.76E-05 | 0.002667 |
| ENT                       | Tonsillectomy adenoids (self-reported)                                  | T             | 378957 | 59321  | 319780   | 0.91  | -0.09411 | 0.023631 | 0.869    | 0.953    | 6.82E-05 | 0.00304  |
| Musculoskeletal           | Osteoarthritis knee                                                     | T             | 330283 | 18217  | 312194   | 0.847 | -0.16603 | 0.041654 | 0.781    | 0.919    | 6.72E-05 | 0.00304  |
| Neurosciences             | Migraine (HES and self-reported)                                        | T             | 378957 | 12905  | 366196   | 1.18  | 0.168248 | 0.042774 | 1.09     | 1.29     | 8.38E-05 | 0.003669 |
| Medication                | Calcium                                                                 | T             | 378957 | 6050   | 373051   | 1.26  | 0.232247 | 0.060435 | 1.12     | 1.42     | 0.000122 | 0.005208 |
| Musculoskeletal           | Osteoarthritis all                                                      | T             | 370576 | 58523  | 312194   | 0.911 | -0.09284 | 0.024179 | 0.869    | 0.956    | 0.000123 | 0.005208 |
| Operations and Procedures | Plastic operations on nose                                              | T             | 378957 | 781    | 378320   | 1.74  | 0.553883 | 0.145181 | 1.31     | 2.31     | 0.000136 | 0.005653 |
| Musculoskeletal           | Osteoarthritis (HES and self-reported)                                  | T             | 378957 | 58523  | 320578   | 0.914 | -0.09013 | 0.024107 | 0.872    | 0.958    | 0.000185 | 0.007556 |
| Summary                   | Ischaemic heart diseases (HES)                                          | T             | 378957 | 27652  | 351449   | 0.88  | -0.12728 | 0.034354 | 0.823    | 0.942    | 0.000211 | 0.00835  |
| Genitourinary             | Hyperplasia of prostate (HES)                                           | T             | 378957 | 10244  | 368857   | 1.2   | 0.182831 | 0.049299 | 1.09     | 1.32     | 0.000208 | 0.00835  |
| Musculoskeletal           | Gonarthrosis (HES)                                                      | T             | 378957 | 18217  | 360884   | 0.859 | -0.15248 | 0.041427 | 0.792    | 0.931    | 0.000233 | 0.009034 |
| Operations and Procedures | Excision of gall bladder                                                | T             | 378957 | 12079  | 367022   | 1.18  | 0.161564 | 0.044348 | 1.08     | 1.28     | 0.000269 | 0.010301 |
| Neurosciences             | Trapped nerve/compressed nerve (HES and self-reported)                  | T             | 378957 | 15824  | 363277   | 0.851 | -0.16133 | 0.044443 | 0.78     | 0.928    | 0.000283 | 0.010665 |
| Anthropometry             | Body mass index BMI                                                     | T             | 377691 | NA     | NA       | NA    | -0.03011 | 0.008325 | -0.04643 | -0.01379 | 0.000299 | 0.011072 |
| Digestive system          | Pancreatitis (HES and self-reported)                                    | T             | 378957 | 2304   | 376797   | 1.4   | 0.333003 | 0.092432 | 1.16     | 1.67     | 0.000315 | 0.011496 |
| Digestive system          | Pancreatic disease (HES and self-reported)                              | T             | 378957 | 2413   | 376688   | 1.38  | 0.323164 | 0.090644 | 1.16     | 1.65     | 0.000364 | 0.013036 |
| Musculoskeletal           | Disc problem (HES and self-reported)                                    | T             | 378957 | 8039   | 371062   | 0.797 | -0.22742 | 0.063845 | 0.703    | 0.903    | 0.000369 | 0.013036 |
| Operations and Procedures | Diagnostic percutaneous operations on liver                             | T             | 378957 | 1755   | 377346   | 1.45  | 0.370142 | 0.104367 | 1.18     | 1.78     | 0.000338 | 0.013432 |
| Operations and Procedures | Endoscopic incision of sphincter of Oddi                                | T             | 378957 | 1801   | 377300   | 1.44  | 0.364936 | 0.102888 | 1.18     | 1.76     | 0.00039  | 0.013432 |
| Family history            | Chronic bronchitis emphysema (family history)                           | T             | 378957 | NA     | NA       | NA    | 0.029214 | 0.008303 | 0.01294  | 0.045489 | 0.000434 | 0.014728 |
| Metabolic                 | Disorders of lipoprotein metabolism and other lipidaemias (HES)         | T             | 378957 | 32636  | 346465   | 0.896 | -0.10962 | 0.031424 | 0.843    | 0.953    | 0.000488 | 0.016256 |
| Summary                   | Diseases of male genital organs (HES)                                   | T             | 378957 | 17819  | 361282   | 1.14  | 0.135365 | 0.039117 | 1.06     | 1.24     | 0.000539 | 0.017258 |
| Operations and Procedures | Contrast radiology of heart                                             | T             | 378957 | 21382  | 357719   | 0.875 | -0.13354 | 0.038527 | 0.811    | 0.944    | 0.000528 | 0.017258 |
| Respiratory               | Spontaneous pneumothorax/recurrent pneumothorax (HES and self-reported) | T             | 378957 | 1034   | 378067   | 1.58  | 0.454489 | 0.131436 | 1.22     | 2.04     | 0.000544 | 0.017258 |
| Other                     | Sleeplessness insomnia                                                  | T             | 378457 | NA     | NA       | NA    | -0.02881 | 0.008317 | -0.04511 | -0.01251 | 0.000532 | 0.017258 |
| Musculoskeletal           | Other intervertebral disc disorders (HES)                               | T             | 378957 | 6634   | 372467   | 0.785 | -0.24172 | 0.070648 | 0.684    | 0.902    | 0.000623 | 0.019484 |
| NA                        | Myocardial infarction                                                   | T             | 378957 | 13488  | 365613   | 0.848 | -0.16431 | 0.048807 | 0.771    | 0.934    | 0.000761 | 0.023504 |
| Genitourinary             | Bph benign prostatic hypertrophy (HES and self-reported)                | T             | 378957 | 10618  | 368483   | 1.18  | 0.16393  | 0.04886  | 1.07     | 1.3      | 0.000793 | 0.024194 |

|                            |                                                                         |   |        |        |        |       |          |            |          |          |          |          |
|----------------------------|-------------------------------------------------------------------------|---|--------|--------|--------|-------|----------|------------|----------|----------|----------|----------|
| Operations and Procedures  | Colectomy hemicolectomy (self-reported)                                 | T | 378957 | 1636   | 377465 | 1.38  | 0.322367 | 0.109432   | 1.11     | 1.71     | 0.003221 | 0.067473 |
| Other                      | Alcohol dependency (HES and self-reported)                              | T | 378957 | 5185   | 373916 | 0.789 | -0.2368  | 0.081294   | 0.673    | 0.925    | 0.003581 | 0.074372 |
| Eye                        | Iridocyclitis (HES)                                                     | T | 378957 | 333    | 378768 | 1.85  | 0.616403 | 0.212239   | 1.22     | 2.81     | 0.003681 | 0.075787 |
| Mental health              | Deliberate self-harm/ suicide attempt (HES and self-reported)           | T | 378957 | 2635   | 376466 | 0.71  | -0.34251 | 0.11833    | 0.563    | 0.895    | 0.003797 | 0.077525 |
| Operations and Procedures  | Attention to stem in organ NOC                                          | T | 378957 | 390    | 378711 | 1.78  | 0.576722 | 0.199804   | 1.2      | 2.63     | 0.003896 | 0.078877 |
| Mental health              | Mental and behavioural disorders due to use of alcohol (HES)            | T | 378957 | 4907   | 374194 | 0.786 | -0.24022 | 0.083657   | 0.668    | 0.927    | 0.004086 | 0.082021 |
| Cardiovascular             | Acute myocardial infarction (HES)                                       | T | 378957 | 7305   | 371796 | 0.827 | -0.19002 | 0.066251   | 0.726    | 0.942    | 0.004129 | 0.082198 |
| Biological assays          | Platelet count                                                          | T | 367720 | NA     | NA     | NA    | 0.024136 | 0.008434   | 0.007605 | 0.040667 | 0.004214 | 0.083207 |
| Operations and Procedures  | Prostate operation (self-reported)                                      | T | 378957 | 859    | 378242 | 1.51  | 0.412188 | 0.144266   | 1.14     | 2        | 0.004275 | 0.083721 |
| Operations and Procedures  | Other therapeutic on outlet of male bladder                             | T | 378957 | 850    | 378251 | 1.52  | 0.418146 | 0.146554   | 1.14     | 2.02     | 0.004328 | 0.083785 |
| Respiratory                | FEV1 FVC ratio never smoked only                                        | T | 109805 | NA     | NA     | NA    | 0.044085 | 0.015459   | 0.013786 | 0.074384 | 0.004347 | 0.083785 |
| Summary                    | Nerve nerve root and plexus disorders (HES)                             | T | 378957 | 16103  | 362998 | 0.884 | -0.12322 | 0.043349   | 0.812    | 0.962    | 0.004477 | 0.085598 |
| Infectious disease         | Viral and other specified intestinal infections (HES)                   | T | 378957 | 770    | 378331 | 1.54  | 0.432166 | 0.152369   | 1.14     | 2.08     | 0.004564 | 0.086571 |
| Summary                    | Diseases of liver (HES)                                                 | T | 378957 | 4603   | 374498 | 1.22  | 0.198064 | 0.069983   | 1.06     | 1.4      | 0.004652 | 0.08756  |
| Immuno-inflammation        | Sarcoidosis (HES)                                                       | T | 378957 | 489    | 378612 | 1.68  | 0.517463 | 0.183154   | 1.17     | 2.4      | 0.004724 | 0.088215 |
| Genitourinary              | Prostate problem not cancer (HES and self-reported)                     | T | 378957 | 11913  | 367188 | 1.14  | 0.132442 | 0.046957   | 1.04     | 1.25     | 0.004795 | 0.088855 |
| Cancer                     | Myeloid leukaemia (cancer register)                                     | T | 378957 | 321    | 378780 | 1.84  | 0.608261 | 0.216737   | 1.2      | 2.81     | 0.005009 | 0.091416 |
| Respiratory                | Emphysemachronic bronchitis (HES and self-reported)                     | T | 378957 | 6338   | 372763 | 1.19  | 0.170082 | 0.060587   | 1.05     | 1.33     | 0.004997 | 0.091416 |
| Operations and Procedures  | Approach to organ through other opening                                 | T | 378957 | 1441   | 377660 | 0.623 | -0.47372 | 0.169005   | 0.447    | 0.867    | 0.005063 | 0.091559 |
| Operations and Procedures  | Radiology with contrast                                                 | T | 378957 | 12447  | 366654 | 1.13  | 0.123777 | 0.044189   | 1.04     | 1.23     | 0.005093 | 0.091559 |
| Musculoskeletal            | Other inflammatory spondylopathies (HES)                                | T | 378957 | 1156   | 377945 | 0.58  | -0.54464 | 0.195      | 0.396    | 0.85     | 0.005222 | 0.093177 |
| Gynaecology and Obstetrics | Breast cysts (HES and self-reported)                                    | T | 378957 | 1673   | 377428 | 1.36  | 0.30548  | 0.109599   | 1.09     | 1.68     | 0.005316 | 0.094158 |
| Cancer                     | Prostate cancer (self-reported)                                         | T | 378957 | 2722   | 376379 | 0.733 | -0.31025 | 0.11225    | 0.588    | 0.914    | 0.005711 | 0.100429 |
| Summary                    | Spondylopathies (HES)                                                   | T | 378957 | 10706  | 368395 | 0.863 | -0.14751 | 0.053523   | 0.777    | 0.958    | 0.005851 | 0.102142 |
| Infectious disease         | Helicobacter pylori (HES)                                               | T | 378957 | 748    | 378353 | 0.476 | -0.7432  | 0.269943   | 0.28     | 0.807    | 0.005902 | 0.102284 |
| Other                      | Poisoning by nonopioid analgesics antipyretics and antirheumatics (HES) | T | 378957 | 1567   | 377534 | 0.643 | -0.44102 | 0.160457   | 0.47     | 0.881    | 0.005986 | 0.103009 |
| Digestive system           | Hepatic failure (HES)                                                   | T | 378957 | 298    | 378803 | 1.85  | 0.616268 | 0.22666    | 1.19     | 2.89     | 0.00655  | 0.111113 |
| Neurosciences              | Headaches not migraine (self-reported)                                  | T | 378957 | 3224   | 375877 | 1.25  | 0.22324  | 0.082105   | 1.06     | 1.47     | 0.006549 | 0.111113 |
| Medication                 | Beta blocking agents thiazides and other diuretics                      | T | 378957 | 15312  | 363789 | 0.886 | -0.1209  | 0.044693   | 0.812    | 0.967    | 0.006829 | 0.114845 |
| Operations and Procedures  | Therapeutic endoscopic operations on semilunar cartilage                | T | 378957 | 12492  | 366609 | 0.875 | -0.13377 | 0.049482   | 0.794    | 0.964    | 0.006865 | 0.114845 |
| Musculoskeletal            | Coxarthrosis (HES)                                                      | T | 378957 | 10780  | 368321 | 0.867 | -0.14229 | 0.053153   | 0.782    | 0.963    | 0.007429 | 0.123432 |
| Summary                    | Other dorsopathies (HES)                                                | T | 378957 | 18099  | 361002 | 0.896 | -0.10922 | 0.040871   | 0.827    | 0.971    | 0.007481 | 0.123434 |
| Cardiovascular             | Pulmonary embolism dvt (HES and self-reported)                          | T | 378957 | 5241   | 373860 | 1.19  | 0.175707 | 0.065818   | 1.05     | 1.36     | 0.007595 | 0.124459 |
| Medication                 | Antacids                                                                | T | 378957 | 6182   | 372919 | 1.18  | 0.163399 | 0.061433   | 1.04     | 1.33     | 0.007819 | 0.125585 |
| ENT                        | Cholesteatoma of middle ear (HES)                                       | T | 378957 | 393    | 378708 | 1.72  | 0.540087 | 0.20323    | 1.15     | 2.56     | 0.007872 | 0.125585 |
| Neurosciences              | Knee pain                                                               | T | 378957 | 86052  | 292179 | 0.948 | -0.05371 | 0.020201   | 0.911    | 0.986    | 0.007846 | 0.125585 |
| Cardiovascular             | Venous thromboembolic disease (HES and self-reported)                   | T | 378957 | 3983   | 375118 | 1.22  | 0.198302 | 0.074548   | 1.05     | 1.41     | 0.007812 | 0.125585 |
| Musculoskeletal            | Other spondylopathies (HES)                                             | T | 378957 | 3685   | 375416 | 0.778 | -0.25048 | 0.094448   | 0.647    | 0.937    | 0.008    | 0.126784 |
| Symptoms                   | Hepatomegaly and splenomegaly (HES)                                     | T | 378957 | 590    | 378511 | 1.58  | 0.455916 | 0.172351   | 1.13     | 2.21     | 0.008163 | 0.128519 |
| Medication                 | All other therapeutic products                                          | T | 378957 | 3557   | 375544 | 1.23  | 0.20757  | 0.078707   | 1.05     | 1.44     | 0.008358 | 0.130413 |
| Respiratory                | FEV1 percent pred strict                                                | T | 221584 | NA     | NA     | NA    | 0.028744 | 0.010905   | 0.007371 | 0.050117 | 0.008391 | 0.130413 |
| Cardiovascular             | Coronary artery bypass grafts cabg (self-reported)                      | T | 378957 | 2799   | 376302 | 0.747 | -0.29217 | 0.111391   | 0.6      | 0.928    | 0.008598 | 0.132773 |
| Haematology                | Diseases of spleen (HES)                                                | T | 378957 | 463    | 378638 | 0.368 | -0.99927 | 0.381005   | 0.174    | 0.777    | 0.008723 | 0.133208 |
| Digestive system           | Stomach disorder (HES and self-reported)                                | T | 378957 | 7348   | 371753 | 1.16  | 0.148799 | 0.056746   | 1.04     | 1.3      | 0.008737 | 0.133208 |
| Genitourinary              | Other disorders of bladder (HES)                                        | T | 378957 | 8086   | 371015 | 1.15  | 0.141738 | 0.054301   | 1.04     | 1.28     | 0.009048 | 0.137093 |
| Genitourinary              | Recurrent and persistent haematuria (HES)                               | T | 378957 | 660    | 378441 | 1.54  | 0.430854 | 0.165436   | 1.11     | 2.13     | 0.009205 | 0.137727 |
| Digestive system           | Liverbiliarypancreas problem (HES and self-reported)                    | T | 378957 | 4283   | 374818 | 1.21  | 0.189746 | 0.072814   | 1.05     | 1.39     | 0.009163 | 0.137727 |
| Other                      | Toxic effect of alcohol (HES)                                           | T | 378957 | 912    | 378189 | 0.556 | -0.58738 | 0.226365   | 0.357    | 0.866    | 0.009463 | 0.139857 |
| Operations and Procedures  | Primary decompression operations on lumbar spine                        | T | 378957 | 2461   | 376640 | 0.735 | -0.30743 | 0.118402   | 0.583    | 0.927    | 0.009419 | 0.139857 |
| Genitourinary              | Urinary tract infectionkidney infection (HES and self-reported)         | T | 378957 | 12655  | 366446 | 1.12  | 0.114096 | 0.044252   | 1.03     | 1.22     | 0.00928  | 0.145834 |
| Summary                    | Certain disorders involving the immune mechanism (HES)                  | T | 378957 | 976    | 378125 | 1.43  | 0.35696  | 0.139142   | 1.09     | 1.88     | 0.010305 | 0.146888 |
| Other                      | Poisoning by psychotropic drugs (HES)                                   | T | 378957 | 1062   | 378039 | 0.594 | -0.52085 | 0.20269    | 0.399    | 0.884    | 0.010179 | 0.146888 |
| Operations and Procedures  | Total prosthetic replacement of hip joint not using cement              | T | 378957 | 4094   | 375007 | 0.797 | -0.22684 | 0.088399   | 0.67     | 0.948    | 0.010285 | 0.146888 |
| NA                         | STEMI                                                                   | T | 378957 | 3811   | 375290 | 0.787 | -0.24015 | 0.093535   | 0.655    | 0.945    | 0.010245 | 0.146888 |
| Family history             | Stroke (family history)                                                 | T | 378957 | NA     | NA     | NA    | -0.02131 | 0.008301   | -0.03758 | -0.00504 | 0.010256 | 0.146888 |
| Digestive system           | Other diseases of stomach and duodenum (HES)                            | T | 378957 | 6601   | 372500 | 1.16  | 0.152702 | 0.05963    | 1.04     | 1.31     | 0.010442 | 0.147516 |
| Cancer                     | Mal neo liver (cancer register)                                         | T | 378957 | 217    | 378884 | 1.95  | 0.665385 | 0.260136   | 1.17     | 3.24     | 0.010533 | 0.147516 |
| Cardiovascular             | Leg pain on walking                                                     | T | 125352 | 27294  | 98122  | 0.912 | -0.09161 | 0.035811   | 0.851    | 0.979    | 0.010522 | 0.147516 |
| Genitourinary              | Iga nephropathy (HES and self-reported)                                 | T | 378957 | 666    | 378435 | 1.52  | 0.421179 | 0.165388   | 1.1      | 2.11     | 0.010878 | 0.151469 |
| Summary                    | Diabetes mellitus (HES)                                                 | T | 378957 | 17982  | 361119 | 0.901 | -0.1043  | 0.04105    | 0.831    | 0.976    | 0.011059 | 0.153109 |
| Operations and Procedures  | Replacement of hip joint                                                | T | 378957 | 1139   | 377962 | 1.38  | 0.325503 | 0.128284   | 1.08     | 1.78     | 0.011169 | 0.153753 |
| Metabolic                  | Unspecified diabetes mellitus (HES)                                     | T | 378957 | 2120   | 376981 | 0.721 | -0.32702 | 0.129313   | 0.56     | 0.929    | 0.011443 | 0.156626 |
| Operations and Procedures  | Other operations on sheath of tendon                                    | T | 378957 | 2908   | 376193 | 0.764 | -0.26938 | 0.107477   | 0.619    | 0.943    | 0.012197 | 0.166009 |
| Eye                        | Cataract (HES and self-reported)                                        | T | 378957 | 20791  | 358310 | 1.09  | 0.089131 | 0.03581    | 1.02     | 1.17     | 0.012809 | 0.173353 |
| Symptoms                   | Acities (HES)                                                           | T | 378957 | 1446   | 377655 | 1.34  | 0.293798 | 0.118234   | 1.06     | 1.69     | 0.01296  | 0.174413 |
| Summary                    | HESCH Diseases of the musculo and connec tissue (HES)                   | T | 378957 | 100763 | 278338 | 0.953 | -0.04772 | 0.019242   | 0.918    | 0.99     | 0.013133 | 0.175476 |
| Operations and Procedures  | Extracorporeal fragmentation of calculus of kidney                      | T | 378957 | 1421   | 376780 | 0.665 | -0.40837 | 0.164748   | 0.481    | 0.918    | 0.013184 | 0.175476 |
| Family history             | Diabetes (family history - sibling)                                     | T | 300905 | 24485  | 276544 | 0.916 | -0.0876  | 0.03539    | 0.855    | 0.982    | 0.013313 | 0.176218 |
| Cardiovascular             | Mean carotid IMT intima medial thickness at 120 degrees                 | T | 1871   | NA     | NA     | NA    | 0.309672 | 0.125236   | 0.064209 | 0.555135 | 0.013409 | 0.176514 |
| Summary                    | Disorders of lens (HES)                                                 | T | 378957 | 18482  | 360619 | 1.1   | 0.092862 | 0.037748   | 1.02     | 1.18     | 0.013892 | 0.181873 |
| Cardiovascular             | Other peripheral vascular diseases (HES)                                | T | 378957 | 3304   | 375797 | 0.782 | -0.24591 | 0.100658   | 0.642    | 0.953    | 0.014563 | 0.188614 |
| Summary                    | Mal neo lymphoid haematopoietic (cancer register)                       | T | 378957 | 3145   | 375956 | 1.23  | 0.204025 | 0.083455   | 1.04     | 1.44     | 0.014496 | 0.188614 |
| Summary                    | Mood affective disorders (HES)                                          | T | 378957 | 11549  | 367552 | 0.883 | -0.12471 | 0.051154   | 0.799    | 0.976    | 0.014768 | 0.19025  |
| Summary                    | Other diseases of urinary system (HES)                                  | T | 378957 | 26755  | 352346 | 1.08  | 0.077108 | 0.031658   | 1.02     | 1.15     | 0.014867 | 0.190498 |
| Musculoskeletal            | Joint pain (HES and self-reported)                                      | T | 378957 | 8344   | 370757 | 0.863 | -0.14717 | 0.060491   | 0.767    | 0.972    | 0.014978 | 0.190915 |
| Cardiovascular             | Atherosclerosis (HES)                                                   | T | 378957 | 1127   | 377974 | 0.633 | -0.45744 | 0.188545   | 0.437    | 0.916    | 0.015259 | 0.192458 |
| Family history             | Parkinson s disease (family history)                                    | T | 378957 | NA     | NA     | NA    | -0.02011 | 0.008287   | -0.03635 | -0.00387 | 0.015226 | 0.192458 |
| Haematology                | Iron deficiency anaemia (HES)                                           | T | 378957 | 6915   | 372186 | 0.851 | -0.16149 | 0.066823   | 0.746    | 0.97     | 0.015566 | 0.196488 |
| Eye                        | Intra ocular pressure corneal compensated left                          | T | 81021  | NA     | NA     | NA    | -0.0429  | 0.017772   | -0.07774 | -0.00807 | 0.015777 | 0.196928 |
| Neurosciences              | Myasthenia gravis (HES and self-reported)                               | T | 378957 | 206    | 378895 | 1.91  | 0.647126 | 0.268443   | 1.13     | 3.23     | 0.015924 | 0.197732 |
| Summary                    | Other forms of heart disease (HES)                                      | T | 378957 | 26042  | 353059 | 0.921 | -0.0827  | 0.034399   | 0.861    | 0.985    | 0.016213 | 0.198234 |
| Digestive system           | Other diseases of liver (HES)                                           | T | 378957 | 3122   | 375979 | 1.22  | 0.202172 | 0.084445   | 1.04     | 1.44     | 0.016666 | 0.198234 |
| Immuno-inflammation        | Nail disorders (HES)                                                    | T | 378957 | 1050   | 378051 | 1.39  | 0.329649 | 0.137679   | 1.06     | 1.82     | 0.016651 | 0.198234 |
| Symptoms                   | Abnormal findings on diagnostic imaging of CNS (HES)                    | T | 378957 | 319    | 378782 | 1.72  | 0.542688 | 0.226057   | 1.1      | 2.68     | 0.016365 | 0.198234 |
| Medication                 | Antimigraine preparations                                               | T | 378957 | 5449   | 373652 | 1.17  | 0.155235 | 0.065057   | 1.03     | 1.33     | 0.017026 | 0.198234 |
| Operations and Procedures  | Spinal fusion (self-reported)                                           | T | 378957 | 517    | 378584 | 0.465 | -0.76496 | 0.319176   | 0.249    | 0.87     | 0.016545 | 0.198234 |
| Cancer                     | Mal neo prostate (cancer register)                                      | T | 378957 | 6546   | 372555 | 0.848 | -0.16475 | 0.069108   | 0.741    | 0.971    | 0.017129 | 0.198234 |
| Operations and Procedures  | High cost musculoskeletal drugs                                         | T | 378957 | 570    | 378531 | 1.53  | 0.424618 | 0.177153</ |          |          |          |          |

|                            |                                                                     |   |        |        |        |       |          |          |          |          |          |          |
|----------------------------|---------------------------------------------------------------------|---|--------|--------|--------|-------|----------|----------|----------|----------|----------|----------|
| Medication                 | Beta blocking agents other combinations                             | T | 378957 | 42301  | 336800 | 0.939 | -0.0634  | 0.027583 | 0.889    | 0.991    | 0.021524 | 0.222119 |
| Musculoskeletal            | Spondylitis (HES)                                                   | T | 378957 | 6891   | 372210 | 0.858 | -0.15309 | 0.066639 | 0.753    | 0.978    | 0.021599 | 0.222119 |
| Operations and Procedures  | Total excision of breast                                            | T | 378957 | 4061   | 375040 | 0.816 | -0.20366 | 0.08859  | 0.686    | 0.97     | 0.021512 | 0.222119 |
| Musculoskeletal            | Cervical spondylitis (HES and self-reported)                        | T | 378957 | 4865   | 374236 | 0.831 | -0.18517 | 0.080702 | 1.009    | 0.973    | 0.02176  | 0.222119 |
| ENT                        | Vertigo (HES and self-reported)                                     | T | 378957 | 697    | 378404 | 1.45  | 0.374627 | 0.163201 | 0.76     | 2        | 0.021705 | 0.222119 |
| Mental health              | Depressive episode (HES)                                            | T | 378957 | 10665  | 368436 | 0.886 | -0.12115 | 0.053093 | 0.798    | 0.983    | 0.022499 | 0.224897 |
| Operations and Procedures  | Other operations on female perineum                                 | T | 378957 | 887    | 378214 | 1.4   | 0.336563 | 0.147478 | 1.05     | 1.87     | 0.022482 | 0.224897 |
| Operations and Procedures  | Suture of organ NOC                                                 | T | 378957 | 640    | 378461 | 1.47  | 0.387486 | 0.169668 | 1.06     | 2.05     | 0.022383 | 0.224897 |
| Cardiovascular             | Aortic stenosis (HES and self-reported)                             | T | 378957 | 1728   | 377373 | 0.722 | -0.326   | 0.142641 | 0.546    | 0.955    | 0.022287 | 0.224897 |
| Family history             | Diabetes (family history)                                           | T | 378957 | NA     | NA     | NA    | -0.01898 | 0.008298 | -0.03524 | -0.00271 | 0.022191 | 0.224897 |
| Summary                    | Disorders of psychological development (HES)                        | T | 378957 | 287    | 378814 | 1.72  | 0.540326 | 0.237718 | 1.08     | 2.74     | 0.023028 | 0.225361 |
| Eye                        | Other disorders of cornea (HES)                                     | T | 378957 | 582    | 378519 | 1.5   | 0.403179 | 0.177055 | 1.06     | 2.12     | 0.022778 | 0.225361 |
| Digestive system           | Other diseases of anus and rectum (HES)                             | T | 378957 | 21218  | 357883 | 0.918 | -0.08547 | 0.037626 | 0.853    | 0.988    | 0.023107 | 0.225361 |
| Cardiovascular             | Cardiac ablation (self-reported)                                    | T | 378957 | 269    | 378832 | 0.266 | -1.32307 | 0.580736 | 0.0853   | 0.831    | 0.022711 | 0.225361 |
| Digestive system           | Bile duct obstruction/ascending cholangitis (HES and self-reported) | T | 378957 | 936    | 378165 | 1.39  | 0.327967 | 0.144347 | 1.05     | 1.84     | 0.023082 | 0.225361 |
| Musculoskeletal            | Spinal stenosis (HES and self-reported)                             | T | 378957 | 3421   | 375680 | 0.803 | -0.21975 | 0.096561 | 0.664    | 0.97     | 0.022864 | 0.225361 |
| Musculoskeletal            | Osteoporosis without pathological fracture (HES)                    | T | 378957 | 5396   | 373705 | 1.16  | 0.149848 | 0.066234 | 1.02     | 1.32     | 0.023672 | 0.227967 |
| Neurosciences              | Knee pain for 3 months vs no pain                                   | T | 354567 | 62522  | 292179 | 0.949 | -0.05188 | 0.022958 | 0.908    | 0.993    | 0.023847 | 0.227967 |
| Operations and Procedures  | Surgical arrest of bleeding from internal nose                      | T | 378957 | 782    | 378319 | 1.42  | 0.352475 | 0.155576 | 1.05     | 1.93     | 0.023475 | 0.227967 |
| Cardiovascular             | Deep venous thrombosis dvt (HES and self-reported)                  | T | 378957 | 8917   | 370184 | 1.12  | 0.117595 | 0.052031 | 1.02     | 1.25     | 0.023816 | 0.227967 |
| Musculoskeletal            | Disc degeneration (HES and self-reported)                           | T | 378957 | 2914   | 376187 | 0.787 | -0.23923 | 0.105768 | 0.64     | 0.969    | 0.023707 | 0.227967 |
| Digestive system           | Fibrosis and cirrhosis of liver (HES)                               | T | 378957 | 756    | 378345 | 1.43  | 0.358405 | 0.159121 | 1.05     | 1.95     | 0.024296 | 0.231344 |
| Operations and Procedures  | Transurethral resection bladder tumour turbt (self-reported)        | T | 378957 | 458    | 378643 | 1.55  | 0.439353 | 0.195514 | 1.06     | 2.28     | 0.024629 | 0.233144 |
| Musculoskeletal            | Back pain (HES and self-reported)                                   | T | 378957 | 14806  | 364295 | 0.904 | -0.10073 | 0.04484  | 0.828    | 0.987    | 0.024679 | 0.233144 |
| Cancer                     | Mal neo brain (cancer register)                                     | T | 378957 | 407    | 378694 | 1.59  | 0.463518 | 0.206728 | 1.06     | 2.38     | 0.024951 | 0.234792 |
| Family history             | Heart disease (family history - sibling)                            | T | 300905 | 29868  | 271161 | 0.93  | -0.07256 | 0.03257  | 0.872    | 0.991    | 0.024883 | 0.241679 |
| Operations and Procedures  | Transluminal operations on varicose vein of leg                     | T | 378957 | 1198   | 379903 | 1.34  | 0.291341 | 0.130754 | 1.04     | 1.73     | 0.02587  | 0.241679 |
| Operations and Procedures  | Carpal tunnel surgery (self-reported)                               | T | 378957 | 3953   | 375148 | 0.821 | -0.19666 | 0.088723 | 0.69     | 0.977    | 0.026553 | 0.24229  |
| Other                      | Hair balding pattern                                                | T | 173207 | 117813 | 55466  | 0.943 | -0.0587  | 0.026445 | 0.895    | 0.993    | 0.026443 | 0.24229  |
| Other                      | Pattern 1 f                                                         | T | 173207 | 55466  | 117813 | 1.06  | 0.058699 | 0.026445 | 1.01     | 1.12     | 0.026443 | 0.24229  |
| Other                      | Pattern 2 f                                                         | T | 173207 | 39959  | 133320 | 0.935 | -0.06699 | 0.030127 | 0.882    | 0.992    | 0.026173 | 0.24229  |
| Operations and Procedures  | Punch biopsy of skin                                                | T | 378957 | 3326   | 375775 | 1.2   | 0.182491 | 0.082309 | 1.02     | 1.41     | 0.026612 | 0.24229  |
| Anthropometry              | Hip circumference                                                   | T | 378245 | NA     | NA     | NA    | 0.018466 | 0.008323 | 0.002154 | 0.034778 | 0.026501 | 0.24229  |
| Eye                        | Intra ocular pressure Goldmann correlated right                     | T | 81141  | NA     | NA     | NA    | -0.0394  | 0.017737 | -0.07416 | -0.00464 | 0.02632  | 0.24229  |
| Eye                        | Cataract                                                            | T | 124323 | 11723  | 112653 | 1.11  | 0.106854 | 0.048289 | 1.01     | 1.22     | 0.026911 | 0.243718 |
| Operations and Procedures  | Introduction of abortifacient into uterine cavity                   | T | 378957 | 623    | 378478 | 0.55  | -0.59784 | 0.27171  | 0.323    | 0.937    | 0.027787 | 0.250711 |
| Summary                    | Other disorders of kidney and ureter (HES)                          | T | 378957 | 2376   | 376725 | 1.23  | 0.210246 | 0.095713 | 1.02     | 1.49     | 0.028047 | 0.251173 |
| Operations and Procedures  | Other local flap of skin                                            | T | 378957 | 1956   | 377145 | 1.26  | 0.229887 | 0.104639 | 1.03     | 1.54     | 0.028024 | 0.251173 |
| Musculoskeletal            | Spine arthritis/spondylitis (HES and self-reported)                 | T | 378957 | 10404  | 368697 | 0.889 | -0.118   | 0.053765 | 0.8      | 0.987    | 0.02818  | 0.251316 |
| Musculoskeletal            | Falls in the last year                                              | T | 378025 | NA     | NA     | NA    | -0.01827 | 0.008331 | -0.0346  | -0.00195 | 0.028272 | 0.251316 |
| Cardiovascular             | Mitral valve prolapse (HES and self-reported)                       | T | 378957 | 545    | 378556 | 1.49  | 0.400175 | 0.182563 | 1.04     | 2.13     | 0.028381 | 0.251361 |
| Operations and Procedures  | Block dissection of lymph nodes                                     | T | 378957 | 5157   | 373944 | 0.844 | -0.16956 | 0.077553 | 0.725    | 0.983    | 0.028788 | 0.254026 |
| Summary                    | Other diseases of intestines (HES)                                  | T | 378957 | 59649  | 319452 | 0.95  | -0.05102 | 0.023423 | 0.908    | 0.995    | 0.029384 | 0.255654 |
| Summary                    | Disorders of bone density and structure (HES)                       | T | 378957 | 8188   | 370913 | 1.13  | 0.118836 | 0.05463  | 1.01     | 1.25     | 0.029609 | 0.255654 |
| Digestive system           | Other diseases of pancreas (HES)                                    | T | 378957 | 1002   | 378099 | 1.36  | 0.308307 | 0.141497 | 1.03     | 1.8      | 0.02934  | 0.255654 |
| Genitourinary              | Other disorders of kidney and ureter (HES)                          | T | 378957 | 2178   | 376923 | 1.24  | 0.216907 | 0.099643 | 1.02     | 1.51     | 0.029492 | 0.255654 |
| Operations and Procedures  | Approach to organ under image control                               | T | 378957 | 45067  | 334034 | 0.944 | -0.05755 | 0.026446 | 0.896    | 0.994    | 0.029543 | 0.255654 |
| Musculoskeletal            | Sjogrens syndrome/sicca syndrome (HES and self-reported)            | T | 378957 | 614    | 378487 | 1.46  | 0.379649 | 0.174507 | 1.04     | 2.06     | 0.029589 | 0.255654 |
| Musculoskeletal            | Raynauds phenomenon/disease (HES and self-reported)                 | T | 378957 | 1315   | 377786 | 0.696 | -0.3631  | 0.167047 | 0.501    | 0.965    | 0.029731 | 0.255793 |
| Summary                    | Mal neo of male genital organs (cancer register)                    | T | 378957 | 7046   | 372055 | 0.867 | -0.14328 | 0.066141 | 0.761    | 0.986    | 0.030286 | 0.259644 |
| Summary                    | Metabolic disorders (HES)                                           | T | 378957 | 39911  | 339190 | 0.941 | -0.0609  | 0.028231 | 0.89     | 0.994    | 0.030983 | 0.260061 |
| Metabolic                  | Non insulin dependent diabetes mellitus (HES)                       | T | 378957 | 16601  | 362500 | 0.912 | -0.0917  | 0.04244  | 0.84     | 0.992    | 0.030726 | 0.260061 |
| Genitourinary              | Other disorders of urinary system (HES)                             | T | 378957 | 17515  | 361586 | 1.09  | 0.082911 | 0.038428 | 1.01     | 1.17     | 0.030962 | 0.260061 |
| Operations and Procedures  | Other excision of breast                                            | T | 378957 | 9523   | 369578 | 0.885 | -0.12198 | 0.056461 | 0.792    | 0.989    | 0.030739 | 0.260061 |
| Family history             | Prostate cancer (family history)                                    | T | 174646 | NA     | NA     | NA    | 0.026453 | 0.012256 | 0.002431 | 0.050474 | 0.030902 | 0.260061 |
| Biological assays          | Mean platelet thrombocyte volume                                    | T | 367716 | NA     | NA     | NA    | -0.01821 | 0.00844  | -0.03476 | -0.00167 | 0.030918 | 0.260061 |
| Symptoms                   | Syncope and collapse (HES)                                          | T | 378957 | 8267   | 370834 | 0.878 | -0.1304  | 0.060488 | 0.78     | 0.988    | 0.031102 | 0.260151 |
| Biological assays          | Monocyte count                                                      | T | 367067 | NA     | NA     | NA    | 0.01818  | 0.008444 | 0.001631 | 0.034729 | 0.031309 | 0.260984 |
| Operations and Procedures  | Endoscopic extirpation of lesion of colon                           | T | 378957 | 14469  | 364632 | 0.907 | -0.09769 | 0.045583 | 0.829    | 0.992    | 0.032108 | 0.266718 |
| Metabolic                  | Type 2 diabetes (HES and self-reported)                             | T | 378957 | 17351  | 361750 | 0.915 | -0.08892 | 0.04152  | 0.843    | 0.992    | 0.032223 | 0.26675  |
| Other                      | DIED                                                                | T | 378957 | 10919  | 368182 | 1.11  | 0.102585 | 0.047948 | 1.01     | 1.22     | 0.032395 | 0.267262 |
| Cardiovascular             | Triple heart bypass (self-reported)                                 | T | 378957 | 526    | 378575 | 0.536 | -0.62438 | 0.292561 | 0.302    | 0.95     | 0.032827 | 0.268929 |
| Operations and Procedures  | Unilateral excision of adnexa of uterus                             | T | 378957 | 1862   | 377239 | 0.748 | -0.29084 | 0.136358 | 0.577    | 0.977    | 0.032932 | 0.268929 |
| Cardiovascular             | Heart arrhythmia (HES and self-reported)                            | T | 378957 | 21190  | 357911 | 0.923 | -0.08051 | 0.037736 | 0.857    | 0.993    | 0.032883 | 0.268929 |
| Summary                    | Abnormal findings on diagnostic imaging (HES)                       | T | 378957 | 8914   | 370187 | 1.12  | 0.111812 | 0.052469 | 1.01     | 1.24     | 0.033088 | 0.269283 |
| Operations and Procedures  | Total excision of spleen                                            | T | 378957 | 281    | 378820 | 0.344 | -1.06733 | 0.503383 | 0.128    | 0.922    | 0.033979 | 0.275604 |
| Gynaecology and Obstetrics | Bilateral oophorectomy (self-reported)                              | T | 378957 | 15863  | 363238 | 0.911 | -0.09274 | 0.04393  | 0.836    | 0.993    | 0.034768 | 0.278705 |
| Operations and Procedures  | Therapeutic transluminal operations on vein                         | T | 378957 | 314    | 378787 | 1.63  | 0.488236 | 0.231382 | 1.04     | 2.56     | 0.034851 | 0.278705 |
| Operations and Procedures  | Facilitating operations NOC                                         | T | 378957 | 2533   | 376568 | 0.788 | -0.23857 | 0.112906 | 0.631    | 0.983    | 0.034603 | 0.278705 |
| Medication                 | Calcium                                                             | T | 377706 | 25583  | 352267 | 1.07  | 0.068979 | 0.032737 | 1        | 1.14     | 0.035111 | 0.278705 |
| Digestive system           | Infective/hepatitis (HES and self-reported)                         | T | 378957 | 1240   | 377861 | 0.692 | -0.36754 | 0.174109 | 0.492    | 0.974    | 0.034777 | 0.278705 |
| Musculoskeletal            | Polymyalgia rheumatica (HES and self-reported)                      | T | 378957 | 1540   | 375561 | 1.28  | 0.244822 | 0.116152 | 1.02     | 1.6      | 0.03505  | 0.278705 |
| Respiratory                | Copd/Exacerbation NI HES SPIROMETRY                                 | T | 25076  | 2309   | 22801  | 1.25  | 0.219775 | 0.104337 | 1.02     | 1.53     | 0.035171 | 0.278705 |
| Medication                 | Antispasmodics in combination with analgesics                       | T | 378957 | 607    | 378494 | 1.45  | 0.371449 | 0.176832 | 1.03     | 2.05     | 0.035679 | 0.280781 |
| Medication                 | Tetracyclines                                                       | T | 378957 | 2224   | 376877 | 1.23  | 0.209763 | 0.099933 | 1.01     | 1.5      | 0.035814 | 0.280781 |
| Operations and Procedures  | Cruciate ligament surgery (self-reported)                           | T | 378957 | 1888   | 377213 | 0.752 | -0.28546 | 0.13606  | 0.756    | 0.981    | 0.035899 | 0.280781 |
| Operations and Procedures  | Other open operations on peritoneum                                 | T | 378957 | 2184   | 376917 | 1.23  | 0.209911 | 0.100011 | 1.01     | 1.5      | 0.035828 | 0.280781 |
| Digestive system           | Other disorders of peritoneum (HES)                                 | T | 378957 | 2824   | 376277 | 1.2   | 0.186437 | 0.088968 | 1.01     | 1.43     | 0.036123 | 0.281615 |
| Operations and Procedures  | Prosthesis of lens                                                  | T | 378957 | 17908  | 361193 | 1.08  | 0.080538 | 0.038485 | 1.01     | 1.17     | 0.036373 | 0.282652 |
| Summary                    | Diseases of myoneural junction and muscle (HES)                     | T | 378957 | 482    | 378619 | 1.5   | 0.407278 | 0.194996 | 1.03     | 2.2      | 0.03674  | 0.283673 |
| Summary                    | Mal neo of central nervous system (cancer register)                 | T | 378957 | 562    | 378539 | 1.46  | 0.380876 | 0.182333 | 1.02     | 2.09     | 0.036716 | 0.283673 |
| Medication                 | Multivitamins combinations                                          | T | 378957 | 19000  | 360101 | 0.921 | -0.08274 | 0.039692 | 0.852    | 0.995    | 0.037103 | 0.284651 |
| Medication                 | High ceiling diuretics                                              | T | 378957 | 3930   | 375171 | 0.83  | -0.18668 | 0.089505 | 0.696    | 0.989    | 0.03701  | 0.284651 |
| Neurosciences              | Hip pain for 3 months vs no pain                                    | T | 362543 | 32691  | 329991 | 0.938 | -0.06351 | 0.030546 | 0.884    | 0.996    | 0.037616 | 0.287671 |
| Operations and Procedures  | Transluminal operations on aorta                                    | T | 378957 | 858    | 378243 | 0.638 | -0.44898 | 0.216353 | 0.418    | 0.975    | 0.037965 | 0.28942  |
| Operations and Procedures  | Other destruction of lesion of skin of other site                   | T | 378957 | 282    | 378819 | 1.66  | 0.505731 | 0.243893 | 1.03     | 2.67     | 0.038119 | 0.289623 |
| Other                      | Overall acceleration average                                        | T | 81434  | NA     | NA     | NA    | -0.0371  | 0.017905 | -0.0722  | -0.00201 | 0.038232 | 0.289623 |
| Gynaecology and Obstetrics | Termination of pregnancy top (self-reported)                        | T | 378957 | 945    | 378156 | 0.662 | -0.41211 | 0.199295 | 0.448    | 0.979    | 0.038655 | 0.290997 |
| Biological assays          | Mean sphericed cell volume                                          |   |        |        |        |       |          |          |          |          |          |          |

|                            |                                                                    |   |        |       |        |       |          |          |          |           |          |          |
|----------------------------|--------------------------------------------------------------------|---|--------|-------|--------|-------|----------|----------|----------|-----------|----------|----------|
| Symptoms                   | Other abnormal immunological findings in serum (HES)               | T | 378957 | 247   | 378854 | 1.68  | 0.518015 | 0.258987 | 1.01     | 2.79      | 0.045484 | 0.314127 |
| Summary                    | Number of self reported non cancer illnesses                       | T | 378896 | NA    | NA     | NA    | 0.016614 | 0.008313 | 0.000321 | 0.032906  | 0.045649 | 0.314195 |
| Summary                    | HESCH Mental and behavioural disorders (HES)                       | T | 378957 | 29106 | 349995 | 0.938 | -0.06429 | 0.032198 | 0.88     | 0.999     | 0.045873 | 0.314835 |
| Operations and Procedures  | Diagnostic endoscopic examination of ileum                         | T | 378957 | 590   | 378511 | 0.583 | -0.53956 | 0.270639 | 0.343    | 0.991     | 0.046189 | 0.315816 |
| Operations and Procedures  | Other operations on cervix uteri                                   | T | 378957 | 247   | 378854 | 1.68  | 0.516008 | 0.258929 | 1.01     | 2.78      | 0.046278 | 0.315816 |
| Operations and Procedures  | Endoscopic ultrasound examination of bile duct                     | T | 378957 | 228   | 378873 | 1.7   | 0.532746 | 0.267443 | 1.01     | 2.88      | 0.046482 | 0.31592  |
| Other                      | Townsend deprivation index at recruitment                          | T | 378505 | NA    | NA     | NA    | -0.01646 | 0.008272 | -0.03268 | -0.00025  | 0.046555 | 0.31592  |
| NA                         | NSTEMI                                                             | T | 378957 | 4419  | 374682 | 0.847 | -0.16653 | 0.038341 | 0.718    | 0.998     | 0.047005 | 0.316995 |
| Cardiovascular             | Leg claudication intermittent claudication (HES and self-reported) | T | 378957 | 2468  | 376633 | 0.795 | -0.22976 | 0.115729 | 0.633    | 0.997     | 0.047109 | 0.316995 |
| Haematology                | Anaemia (HES and self-reported)                                    | T | 378957 | 17268 | 361833 | 0.921 | -0.08214 | 0.04135  | 0.849    | 0.999     | 0.046992 | 0.316995 |
| Medication                 | Corticosteroids                                                    | T | 378957 | 4111  | 374990 | 1.16  | 0.14828  | 0.075021 | 1        | 1.34      | 0.048096 | 0.319816 |
| Operations and Procedures  | Reconstruction of femoral artery                                   | T | 378957 | 231   | 378870 | 0.316 | -1.15115 | 0.581343 | 0.101    | 0.988     | 0.047686 | 0.319816 |
| Operations and Procedures  | Plastic operations on penis                                        | T | 378957 | 394   | 378707 | 1.53  | 0.425779 | 0.215355 | 1        | 2.33      | 0.04803  | 0.319816 |
| Digestive system           | Anal problem (HES and self-reported)                               | T | 378957 | 23889 | 355212 | 0.933 | -0.06981 | 0.035355 | 0.87     | 0.999     | 0.048324 | 0.319816 |
| Digestive system           | Haemochromatosis (HES and self-reported)                           | T | 378957 | 635   | 378466 | 1.42  | 0.349445 | 0.176659 | 1        | 2.01      | 0.04792  | 0.319816 |
| Musculoskeletal            | Fracture tibia (HES and self-reported)                             | T | 378957 | 1942  | 377159 | 1.23  | 0.209621 | 0.106119 | 1        | 1.52      | 0.04823  | 0.319816 |
| Digestive system           | Other diseases of biliary tract (HES)                              | T | 378957 | 1752  | 377349 | 1.24  | 0.218904 | 0.110992 | 1        | 1.55      | 0.048582 | 0.32023  |
| Medication                 | Dopaminergic agents                                                | T | 378957 | 1188  | 377913 | 0.71  | -0.34296 | 0.174283 | 0.504    | 0.999     | 0.04909  | 0.32023  |
| Neurosciences              | Back pain for 3 months vs no pain                                  | T | 341405 | 65312 | 276219 | 0.957 | -0.04442 | 0.022597 | 0.915    | 1         | 0.049327 | 0.32023  |
| Cancer                     | Mal neo pancreas (cancer register)                                 | T | 378957 | 463   | 378638 | 1.48  | 0.389615 | 0.19868  | 1        | 2.18      | 0.049877 | 0.32023  |
| Operations and Procedures  | Connection between lacrimal apparatus and nose                     | T | 378957 | 711   | 378390 | 0.626 | -0.46857 | 0.238969 | 0.392    | 1         | 0.049901 | 0.32023  |
| Operations and Procedures  | Transluminal operations on femoral artery                          | T | 378957 | 1076  | 378025 | 0.695 | -0.36381 | 0.185607 | 0.483    | 1         | 0.049982 | 0.32023  |
| Operations and Procedures  | Diagnostic imaging procedures                                      | T | 378957 | 15463 | 363638 | 1.08  | 0.079648 | 0.040625 | 1        | 1.17      | 0.049928 | 0.32023  |
| Infectious disease         | Whooping cough pertussis (HES and self-reported)                   | T | 378957 | 415   | 378686 | 1.5   | 0.405456 | 0.206649 | 1        | 2.25      | 0.049757 | 0.32023  |
| Musculoskeletal            | Fracture radius (HES and self-reported)                            | T | 378957 | 5082  | 374019 | 0.859 | -0.15199 | 0.077528 | 0.738    | 1         | 0.049936 | 0.32023  |
| Musculoskeletal            | Fracture upper limb shoulder (HES and self-reported)               | T | 378957 | 10515 | 368586 | 0.901 | -0.10471 | 0.053165 | 0.811    | 0.999     | 0.048899 | 0.32023  |
| Biological assays          | Monocyte percentage                                                | T | 367073 | NA    | NA     | NA    | 0.016266 | 0.008445 | 7.30E-05 | 0.033179  | 0.048994 | 0.32023  |
| Biological assays          | Neutrophil percentage                                              | T | 367073 | NA    | NA     | NA    | -0.01664 | 0.008445 | -0.03319 | -8.83E-05 | 0.048786 | 0.32023  |
| Genitourinary              | Other female pelvic inflammatory diseases (HES)                    | T | 378957 | 2493  | 376608 | 1.2   | 0.185294 | 0.09486  | 0.999    | 1.45      | 0.050778 | 0.324458 |
| Metabolic                  | Diabetes (HES and self-reported)                                   | T | 378957 | 15907 | 363194 | 0.919 | -0.08422 | 0.043139 | 0.845    | 1         | 0.050911 | 0.324458 |
| Eye                        | Other disorders of conjunctiva (HES)                               | T | 378957 | 672   | 378429 | 0.621 | -0.47709 | 0.245877 | 0.383    | 1         | 0.052317 | 0.327857 |
| Musculoskeletal            | Seropositive rheumatoid arthritis (HES)                            | T | 378957 | 529   | 378572 | 1.44  | 0.365721 | 0.188327 | 0.997    | 2.09      | 0.052144 | 0.327857 |
| Cardiovascular             | Mitral valve repair replacement (self-reported)                    | T | 378957 | 354   | 378747 | 0.476 | -0.7422  | 0.38193  | 0.225    | 1.01      | 0.05198  | 0.327857 |
| Operations and Procedures  | Operations on spinal nerve root                                    | T | 378957 | 2302  | 376799 | 0.794 | -0.23057 | 0.118505 | 0.629    | 1         | 0.051698 | 0.327857 |
| Operations and Procedures  | Correction of deformity of eyelid                                  | T | 378957 | 816   | 378285 | 1.35  | 0.30179  | 0.155486 | 0.997    | 1.83      | 0.052266 | 0.327857 |
| Operations and Procedures  | Transluminal balloon angioplasty of coronary artery                | T | 378957 | 2913  | 376188 | 0.816 | -0.20285 | 0.104571 | 0.665    | 1         | 0.052397 | 0.327857 |
| Gynaecology and Obstetrics | Ovarian problem (HES and self-reported)                            | T | 378957 | 4956  | 374145 | 0.859 | -0.15222 | 0.078391 | 0.736    | 1         | 0.052155 | 0.327857 |
| Medication                 | Uterotronics                                                       | T | 378957 | 6031  | 373070 | 0.872 | -0.13645 | 0.070563 | 0.76     | 1         | 0.053145 | 0.329    |
| Cardiovascular             | Atrioventricular and left bundle branch block (HES)                | T | 378957 | 3286  | 375815 | 0.829 | -0.18776 | 0.0972   | 0.685    | 1         | 0.053399 | 0.329    |
| Symptoms                   | Retention of urine (HES)                                           | T | 378957 | 6149  | 372952 | 1.13  | 0.120846 | 0.062553 | 0.998    | 1.28      | 0.053374 | 0.329    |
| Operations and Procedures  | Other therapeutic transluminal operations on vein                  | T | 378957 | 1371  | 377730 | 1.27  | 0.230828 | 0.12307  | 0.997    | 1.61      | 0.053102 | 0.329    |
| Operations and Procedures  | Diagnostic endoscopic examination of urethra                       | T | 378957 | 369   | 378732 | 1.53  | 0.426426 | 0.220249 | 0.995    | 2.36      | 0.052804 | 0.329    |
| Musculoskeletal            | Sciatica (HES and self-reported)                                   | T | 378957 | 5455  | 373646 | 0.866 | -0.14422 | 0.074535 | 0.748    | 1         | 0.053005 | 0.329    |
| Operations and Procedures  | Preprosthetic oral surgery                                         | T | 378957 | 274   | 378827 | 1.62  | 0.483331 | 0.250713 | 0.992    | 2.65      | 0.053877 | 0.331093 |
| Cardiovascular             | Essential hypertension (HES and self-reported)                     | T | 378957 | 71076 | 308025 | 0.958 | -0.04289 | 0.022298 | 0.917    | 1         | 0.054442 | 0.333715 |
| Haematology                | Neutropenilymphopenia (HES and self-reported)                      | T | 378957 | 2972  | 376129 | 1.18  | 0.167753 | 0.087353 | 0.997    | 1.4       | 0.054806 | 0.335094 |
| Musculoskeletal            | Osteopenia (HES and self-reported)                                 | T | 378957 | 990   | 378111 | 1.32  | 0.27393  | 0.143064 | 0.994    | 1.74      | 0.055526 | 0.338636 |
| Medication                 | Antifungals for systemic use                                       | T | 378957 | 843   | 378258 | 1.35  | 0.296396 | 0.155163 | 0.992    | 1.82      | 0.056104 | 0.340221 |
| Cardiovascular             | Atrial fibrillation and flutter (HES)                              | T | 378957 | 13484 | 365617 | 0.914 | -0.0897  | 0.046951 | 0.834    | 1         | 0.056076 | 0.340221 |
| Digestive system           | Ventral hernia (HES)                                               | T | 378957 | 3093  | 376008 | 1.18  | 0.163764 | 0.085816 | 0.996    | 1.39      | 0.05635  | 0.340221 |
| Other                      | Poisoning by narcotics and psychodysleptics (HES)                  | T | 378957 | 598   | 378503 | 0.597 | -0.51641 | 0.270597 | 0.351    | 1.01      | 0.056339 | 0.340221 |
| Summary                    | Disorders of conjunctiva (HES)                                     | T | 378957 | 908   | 378193 | 0.679 | -0.38653 | 0.203048 | 0.456    | 1.01      | 0.05696  | 0.34304  |
| Eye                        | Other cataract (HES)                                               | T | 378957 | 13094 | 366007 | 1.09  | 0.084144 | 0.044316 | 0.997    | 1.19      | 0.057599 | 0.344321 |
| Cancer                     | Breast cancer (self-reported)                                      | T | 378957 | 8389  | 370712 | 0.893 | -0.11354 | 0.0598   | 0.794    | 1         | 0.057601 | 0.344321 |
| Metabolic                  | Type 1 diabetes (HES and self-reported)                            | T | 378957 | 2663  | 376438 | 0.812 | -0.20789 | 0.109392 | 0.656    | 1.01      | 0.057377 | 0.344321 |
| Digestive system           | Cholecystitis (HES)                                                | T | 378957 | 2442  | 376659 | 1.2   | 0.181884 | 0.095971 | 0.994    | 1.45      | 0.058065 | 0.346231 |
| Summary                    | Nutritional anaemias (HES)                                         | T | 378957 | 7757  | 371344 | 0.889 | -0.11731 | 0.061934 | 0.788    | 1         | 0.058218 | 0.346231 |
| Metabolic                  | Hypofunction and other disorders of pituitary gland (HES)          | T | 378957 | 359   | 378742 | 0.485 | -0.72277 | 0.381855 | 0.23     | 1.03      | 0.058386 | 0.346434 |
| Symptoms                   | Pain in throat and chest (HES)                                     | T | 378957 | 28963 | 350138 | 0.941 | -0.06094 | 0.032235 | 0.883    | 1         | 0.058698 | 0.347426 |
| Metabolic                  | Disorders of mineral metabolism (HES)                              | T | 378957 | 1975  | 377126 | 1.22  | 0.199657 | 0.106135 | 0.992    | 1.5       | 0.05995  | 0.353967 |
| Musculoskeletal            | Dorsalgia (HES)                                                    | T | 378957 | 13010 | 366091 | 0.915 | -0.08936 | 0.047541 | 0.833    | 1         | 0.060145 | 0.354251 |
| Haematology                | Other anaemias (HES)                                               | T | 378957 | 10478 | 368623 | 0.905 | -0.09936 | 0.053021 | 0.816    | 1         | 0.06093  | 0.357242 |
| Operations and Procedures  | Excision of salivary gland                                         | T | 378957 | 935   | 378166 | 0.689 | -0.37293 | 0.19913  | 0.466    | 1.02      | 0.061097 | 0.357242 |
| ENT                        | Speech reception threshold SRT estimate left                       | T | 114644 | NA    | NA     | NA    | 0.02801  | 0.014949 | -0.00129 | 0.057309  | 0.060968 | 0.357242 |
| Gynaecology and Obstetrics | Age started hormone replacement therapy HRT                        | T | 71364  | NA    | NA     | NA    | 0.036159 | 0.019336 | -0.00174 | 0.074057  | 0.061481 | 0.358612 |
| Medication                 | Ace inhibitors combinations                                        | T | 378957 | 54539 | 324562 | 0.955 | -0.04621 | 0.024734 | 0.91     | 1         | 0.061704 | 0.359048 |
| Operations and Procedures  | Therapeutic endoscopic operations on peritoneum                    | T | 378957 | 1599  | 377502 | 1.24  | 0.217605 | 0.116577 | 0.989    | 1.56      | 0.061955 | 0.359638 |
| Eye                        | Disorders of orbit (HES)                                           | T | 378957 | 250   | 378851 | 0.392 | -0.9368  | 0.50387  | 0.146    | 1.05      | 0.062997 | 0.364809 |
| Medication                 | Diuretics and potassium sparing agents in combination              | T | 378957 | 27954 | 351147 | 0.941 | -0.06117 | 0.03296  | 0.882    | 1         | 0.063477 | 0.366703 |
| Summary                    | Mental disorders due to psychoactive sub (HES)                     | T | 378957 | 14024 | 365077 | 0.918 | -0.0858  | 0.046307 | 0.838    | 1         | 0.063896 | 0.368241 |
| Summary                    | HESCH Diseases of the genitourinary system (HES)                   | T | 378957 | 91318 | 287783 | 1.04  | 0.036098 | 0.019539 | 0.998    | 1.08      | 0.064682 | 0.371719 |
| Musculoskeletal            | Other necrotizing vasculopathies (HES)                             | T | 378957 | 542   | 378559 | 1.42  | 0.347538 | 0.18822  | 0.999    | 2.05      | 0.064828 | 0.371719 |
| Operations and Procedures  | Cardioverter defibrillator introduced through the vein             | T | 378957 | 599   | 378502 | 0.617 | -0.48291 | 0.26183  | 0.369    | 1.03      | 0.065129 | 0.371719 |
| Gynaecology and Obstetrics | Breast fibroadenoma (HES and self-reported)                        | T | 378957 | 1450  | 377651 | 0.753 | -0.28337 | 0.153568 | 0.557    | 1.02      | 0.065    | 0.371719 |
| Musculoskeletal            | Disorders of patella (HES)                                         | T | 378957 | 841   | 378260 | 1.33  | 0.2849   | 0.155182 | 0.981    | 1.8       | 0.066371 | 0.371878 |
| Musculoskeletal            | Internal derangement of knee (HES)                                 | T | 378957 | 13926 | 365175 | 0.919 | -0.0845  | 0.045918 | 0.84     | 1.01      | 0.06572  | 0.371878 |
| Other                      | Poisoning antiepileptic hypotonic antiparkinsonism drugs (HES)     | T | 378957 | 851   | 378250 | 0.677 | -0.38991 | 0.211642 | 0.447    | 1.03      | 0.065432 | 0.371878 |
| Gynaecology and Obstetrics | Hysterectomy (self-reported)                                       | T | 378957 | 37549 | 341552 | 0.946 | -0.05546 | 0.030167 | 0.892    | 1         | 0.066014 | 0.371878 |
| Operations and Procedures  | Lipoma removed excision of lipoma (self-reported)                  | T | 378957 | 600   | 378501 | 1.39  | 0.329357 | 0.179368 | 0.978    | 1.98      | 0.066326 | 0.371878 |
| Operations and Procedures  | Other biops of skin                                                | T | 378957 | 1597  | 377504 | 1.24  | 0.214022 | 0.116483 | 0.986    | 1.56      | 0.066157 | 0.371878 |
| Operations and Procedures  | Other open repair of ligament                                      | T | 378957 | 420   | 378681 | 0.539 | -0.61893 | 0.337135 | 0.278    | 1.04      | 0.066379 | 0.371878 |
| Musculoskeletal            | Fracture forearm wrist (HES and self-reported)                     | T | 378957 | 8702  | 370399 | 0.898 | -0.10712 | 0.058302 | 0.801    | 1.01      | 0.066175 | 0.371878 |
| Operations and Procedures  | Operations on hydrocele sac                                        | T | 378957 | 1029  | 378072 | 1.3   | 0.262267 | 0.142968 | 0.982    | 1.72      | 0.066588 | 0.372182 |
| Operations and Procedures  | Diagnostic endoscopic examination of knee joint                    | T | 378957 | 3016  | 376085 | 0.829 | -0.18765 | 0.102555 | 0.678    | 1.01      | 0.067283 | 0.375198 |
| Operations and Procedures  | Bone and intramedullary fixation                                   | T | 378957 | 2523  | 376578 | 0.814 | -0.20577 | 0.112614 | 0.653    | 1.02      | 0.067666 | 0.376462 |
| Operations and Procedures  | Opening of abdomen                                                 | T | 378957 | 940   | 378161 | 1.31  | 0.270455 | 0.148482 | 0.98     | 1.75      | 0.068536 | 0.380261 |
| Neurosciences              | Benign essential tremor (HES and self-reported)                    | T | 378957 | 270   | 378831 | 0.44  | -0.82182 | 0.451395 | 0.181    | 1.06      | 0.068665 | 0.380261 |
| Immunology                 | Other erythematous conditions (HES)                                | T | 378957 | 481   | 378620 | 1.43  | 0.360511 | 0.198365 | 0.972    | 2.12      | 0.069154 | 0.382089 |
| Other                      | Pack years                                                         | T | 110892 | NA    | NA     | NA    | 0.0281   | 0.015488 | -0.05845 | 0.00226   |          |          |

|                            |                                                                      |   |        |       |        |       |          |          |          |          |          |          |
|----------------------------|----------------------------------------------------------------------|---|--------|-------|--------|-------|----------|----------|----------|----------|----------|----------|
| Genitourinary              | Other disorders of urethra (HES)                                     | T | 378957 | 692   | 378409 | 1.35  | 0.298163 | 0.169298 | 0.967    | 1.88     | 0.078208 | 0.401714 |
| Operations and Procedures  | Arthroscopy nos (self-reported)                                      | T | 378957 | 8377  | 370724 | 0.901 | -0.10462 | 0.059279 | 0.802    | 1.01     | 0.077582 | 0.401714 |
| Operations and Procedures  | Percutaneous transluminal balloon                                    | T | 378957 | 5594  | 373507 | 0.879 | -0.12912 | 0.073259 | 0.761    | 1.01     | 0.07798  | 0.401714 |
| Neurosciences              | Maximum digits remembered correctly                                  | T | 116599 | NA    | NA     | NA    | 0.026116 | 0.014825 | -0.00294 | 0.055173 | 0.07813  | 0.401714 |
| Operations and Procedures  | Knee replacement revision (self-reported)                            | T | 378957 | 4614  | 374487 | 0.868 | -0.141   | 0.080256 | 0.742    | 1.02     | 0.078938 | 0.403043 |
| Respiratory                | Bring up phlegm sputum mucus on most days                            | T | 95656  | 8125  | 87571  | 0.898 | -0.10793 | 0.061417 | 0.796    | 1.01     | 0.078855 | 0.403043 |
| Operations and Procedures  | Opening into gastrointestinal tract                                  | T | 378957 | 207   | 378894 | 0.36  | -1.02185 | 0.058176 | 0.115    | 1.13     | 0.078984 | 0.403043 |
| Infectious disease         | Hivaid (HES and self-reported)                                       | T | 378957 | 309   | 378792 | 1.53  | 0.427575 | 0.243532 | 0.951    | 2.47     | 0.079136 | 0.403043 |
| ENT                        | Hearing aid user                                                     | T | 230464 | 11351 | 219204 | 1.09  | 0.083814 | 0.04785  | 0.99     | 1.19     | 0.079843 | 0.405678 |
| Operations and Procedures  | Diagnostic microendoscopic examination of larynx                     | T | 378957 | 246   | 378855 | 0.415 | -0.88059 | 0.053822 | 0.154    | 1.11     | 0.080494 | 0.405678 |
| Operations and Procedures  | Repair of recurrent incisional hernia                                | T | 378957 | 225   | 378876 | 1.62  | 0.48286  | 0.276264 | 0.943    | 2.79     | 0.080496 | 0.405678 |
| Immuno-inflammation        | Connective tissue disorder (HES and self-reported)                   | T | 378957 | 2304  | 376797 | 1.19  | 0.172594 | 0.098676 | 0.979    | 1.44     | 0.080274 | 0.405678 |
| Genitourinary              | Polycystic kidney (HES and self-reported)                            | T | 378957 | 1630  | 374741 | 1.22  | 0.202406 | 0.115768 | 0.976    | 1.54     | 0.080399 | 0.405678 |
| Eye                        | Other serious eye condition                                          | T | 124323 | 6929  | 117447 | 0.892 | -0.11433 | 0.065466 | 0.785    | 1.01     | 0.080737 | 0.406046 |
| Haematology                | Pancytopenia (HES and self-reported)                                 | T | 378957 | 406   | 378695 | 1.46  | 0.375034 | 0.214998 | 0.955    | 2.22     | 0.081097 | 0.407006 |
| ENT                        | Dental tooth surgery (self-reported)                                 | T | 378957 | 999   | 378102 | 1.29  | 0.250928 | 0.144097 | 0.969    | 1.7      | 0.081618 | 0.408769 |
| Operations and Procedures  | Excision of nail                                                     | T | 378957 | 608   | 378493 | 1.37  | 0.315157 | 0.181903 | 0.959    | 1.96     | 0.083176 | 0.415706 |
| Operations and Procedures  | Other total prosthetic replacement of other joint                    | T | 378957 | 332   | 378769 | 0.516 | -0.66128 | 0.382188 | 0.244    | 1.09     | 0.083588 | 0.416903 |
| Summary                    | Urticaria and erythema (HES)                                         | T | 378957 | 948   | 378153 | 1.29  | 0.256553 | 0.148443 | 0.966    | 1.73     | 0.083936 | 0.41691  |
| Operations and Procedures  | Gestational age                                                      | T | 378957 | 395   | 378706 | 1.46  | 0.376727 | 0.218781 | 0.951    | 2.23     | 0.083786 | 0.41691  |
| Summary                    | Neurotic stress related and somatoform disorders (HES)               | T | 378957 | 6748  | 372353 | 0.892 | -0.1144  | 0.066302 | 0.783    | 1.02     | 0.084447 | 0.41783  |
| Operations and Procedures  | Drainage of organ NOC                                                | T | 378957 | 2627  | 376474 | 1.17  | 0.160691 | 0.093136 | 0.978    | 1.41     | 0.084468 | 0.41783  |
| Immuno-inflammation        | Other disorders of skin and subcutaneous tissue (HES)                | T | 378957 | 5075  | 374026 | 1.13  | 0.118107 | 0.068626 | 0.984    | 1.29     | 0.085247 | 0.42082  |
| Haematology                | Agranulocytosis (HES)                                                | T | 378957 | 2906  | 376195 | 1.17  | 0.152938 | 0.088921 | 0.979    | 1.39     | 0.085443 | 0.420924 |
| Genitourinary              | Noninflammatory ovary fallop (HES)                                   | T | 378957 | 4666  | 374435 | 0.871 | -0.13763 | 0.08022  | 0.745    | 1.02     | 0.086232 | 0.423947 |
| Cancer                     | Mal neo oesophagus (cancer register)                                 | T | 378957 | 516   | 378585 | 0.618 | -0.48188 | 0.281219 | 0.356    | 1.07     | 0.086613 | 0.424715 |
| Operations and Procedures  | Obliteration of cavity of organ NOC                                  | T | 378957 | 637   | 378464 | 0.656 | -0.4212  | 0.246044 | 0.405    | 1.06     | 0.086918 | 0.424715 |
| Digestive system           | Bowel intestinal perforation (HES and self-reported)                 | T | 378957 | 387   | 378714 | 1.46  | 0.376307 | 0.21982  | 0.947    | 2.24     | 0.086917 | 0.424715 |
| Operations and Procedures  | Suture of skin of head or neck                                       | T | 378957 | 774   | 378327 | 0.685 | -0.37849 | 0.221468 | 0.444    | 1.06     | 0.087447 | 0.426435 |
| Operations and Procedures  | Operations on vitreous body                                          | T | 378957 | 3853  | 375248 | 1.14  | 0.132621 | 0.0778   | 0.98     | 1.33     | 0.088261 | 0.427847 |
| Infectious disease         | Helicobacter pylori (HES and self-reported)                          | T | 378957 | 1773  | 377328 | 0.79  | -0.23621 | 0.13857  | 0.602    | 1.04     | 0.088269 | 0.427847 |
| Biological assays          | Mean reticulocyte volume                                             | T | 361630 | NA    | NA     | NA    | -0.01451 | 0.008512 | -0.0312  | 0.00217  | 0.08817  | 0.427847 |
| Genitourinary              | Calculus of kidney and ureter (HES)                                  | T | 378957 | 4404  | 374697 | 0.868 | -0.14114 | 0.083106 | 0.738    | 1.02     | 0.089447 | 0.432686 |
| Medication                 | Androgens                                                            | T | 378957 | 555   | 378546 | 0.632 | -0.45842 | 0.270961 | 0.372    | 1.08     | 0.090678 | 0.436887 |
| Metabolic                  | Other disorders of thyroid (HES)                                     | T | 378957 | 357   | 378744 | 0.546 | -0.60543 | 0.357782 | 0.271    | 1.1      | 0.090612 | 0.436887 |
| Family history             | Lung cancer (family history)                                         | T | 378957 | NA    | NA     | NA    | -0.01402 | 0.008301 | -0.03029 | 0.002249 | 0.091202 | 0.437992 |
| Eye                        | Intra ocular pressure corneal compensated right                      | T | 81144  | NA    | NA     | NA    | -0.02994 | 0.017729 | -0.06469 | 0.00481  | 0.091271 | 0.437992 |
| Summary                    | Suppurative and necrotic conditions of lower respiratory tract (HES) | T | 378957 | 346   | 378755 | 1.48  | 0.388889 | 0.23069  | 0.939    | 2.32     | 0.091833 | 0.438039 |
| Infectious disease         | Other septicaemia (HES)                                              | T | 378957 | 3387  | 375714 | 1.15  | 0.14004  | 0.08303  | 0.978    | 1.35     | 0.091676 | 0.438039 |
| Operations and Procedures  | Barium meal barium swallow (self-reported)                           | T | 378957 | 221   | 378880 | 1.59  | 0.465761 | 0.276433 | 0.927    | 2.74     | 0.092008 | 0.438039 |
| ENT                        | Mouth ulcers                                                         | T | 377502 | 38476 | 339170 | 1.05  | 0.045694 | 0.027084 | 0.993    | 1.1      | 0.091574 | 0.438039 |
| Operations and Procedures  | Plastic operations on external ear                                   | T | 378957 | 299   | 378802 | 0.5   | -0.69376 | 0.412523 | 0.223    | 1.12     | 0.092616 | 0.440061 |
| Digestive system           | Gastritis and duodenitis (HES)                                       | T | 378957 | 26187 | 352914 | 0.945 | -0.05672 | 0.033858 | 0.884    | 1.01     | 0.093872 | 0.441914 |
| Operations and Procedures  | Oesophageal fundoplication hiatus hernia surgery (self-reported)     | T | 378957 | 906   | 378195 | 0.716 | -0.33368 | 0.199236 | 0.485    | 1.06     | 0.093976 | 0.441914 |
| Cancer                     | Other types of non Hodgkin s lymphoma (cancer register)              | T | 378957 | 408   | 378693 | 1.43  | 0.359856 | 0.214952 | 0.94     | 2.18     | 0.094106 | 0.441914 |
| Operations and Procedures  | Other excision of adnexa of uterus                                   | T | 378957 | 224   | 378877 | 1.59  | 0.462928 | 0.276488 | 0.924    | 2.73     | 0.094069 | 0.441914 |
| Operations and Procedures  | Radiology procedures                                                 | T | 378957 | 30410 | 348691 | 1.05  | 0.050432 | 0.030085 | 0.992    | 1.12     | 0.093676 | 0.441914 |
| Musculoskeletal            | Fracture hand (HES and self-reported)                                | T | 378957 | 1148  | 377953 | 0.746 | -0.29272 | 0.174366 | 0.53     | 1.05     | 0.093197 | 0.441914 |
| Digestive system           | Oesophagitis (HES)                                                   | T | 378957 | 8251  | 370850 | 1.1   | 0.091925 | 0.054951 | 0.984    | 1.22     | 0.094359 | 0.44224  |
| Operations and Procedures  | Other blood transfusion                                              | T | 378957 | 4631  | 374470 | 0.874 | -0.1343  | 0.08048  | 0.747    | 1.02     | 0.095182 | 0.444428 |
| Mental health              | Obsessive compulsive disorder ocd (HES and self-reported)            | T | 378957 | 208   | 378893 | 1.61  | 0.478178 | 0.286733 | 0.92     | 2.83     | 0.09538  | 0.444428 |
| Neurosciences              | Prospective memory result                                            | T | 126215 | NA    | NA     | NA    | -0.02375 | 0.014233 | -0.05164 | 0.00415  | 0.095228 | 0.444428 |
| Summary                    | Mycoses (HES)                                                        | T | 378957 | 2468  | 376633 | 1.17  | 0.160429 | 0.096341 | 0.972    | 1.42     | 0.095867 | 0.444978 |
| Infectious disease         | Candidiasis (HES)                                                    | T | 378957 | 1983  | 377118 | 1.19  | 0.177657 | 0.106627 | 0.969    | 1.47     | 0.095683 | 0.444978 |
| Gynaecology and Obstetrics | Haemorrhage in early pregnancy (HES)                                 | T | 378957 | 836   | 378265 | 0.706 | -0.34783 | 0.209062 | 0.469    | 1.06     | 0.096156 | 0.445461 |
| Operations and Procedures  | Puncture of joint                                                    | T | 378957 | 10120 | 368981 | 0.914 | -0.08943 | 0.053809 | 0.823    | 1.02     | 0.096497 | 0.446184 |
| Musculoskeletal            | Soft tissue disorders related to use overuse and pressure (HES)      | T | 378957 | 1500  | 377601 | 0.781 | -0.24655 | 0.148489 | 0.584    | 1.05     | 0.096839 | 0.446203 |
| Genitourinary              | Female genital prolapse (HES)                                        | T | 378957 | 10411 | 368690 | 1.09  | 0.082564 | 0.049731 | 0.985    | 1.12     | 0.096872 | 0.446203 |
| Cardiovascular             | Leg artery angioplasty stent (self-reported)                         | T | 378957 | 443   | 378658 | 0.603 | -0.50596 | 0.305665 | 0.331    | 1.1      | 0.097866 | 0.448445 |
| Eye                        | Macular degeneration                                                 | T | 124323 | 2870  | 121506 | 1.16  | 0.14882  | 0.08982  | 0.973    | 1.38     | 0.097547 | 0.448445 |
| Gynaecology and Obstetrics | Endometriosis (HES and self-reported)                                | T | 378957 | 5960  | 373141 | 0.89  | -0.11684 | 0.070598 | 0.775    | 1.02     | 0.097917 | 0.448445 |
| Cardiovascular             | Cerebral infarction (HES)                                            | T | 378957 | 2917  | 376184 | 0.844 | -0.16996 | 0.102811 | 0.69     | 1.03     | 0.098314 | 0.449407 |
| Haematology                | Other diseases of blood and blood forming organs (HES)               | T | 378957 | 563   | 378538 | 1.36  | 0.310096 | 0.18797  | 0.943    | 1.97     | 0.099002 | 0.451695 |
| Operations and Procedures  | Other reconstruction of joint                                        | T | 378957 | 2374  | 376727 | 0.83  | -0.18692 | 0.113477 | 0.664    | 1.04     | 0.099513 | 0.45317  |
| Respiratory                | CopdExacerbation GOLD2orHigher                                       | T | 8822   | 486   | 8345   | 1.41  | 0.342845 | 0.208473 | 0.936    | 2.12     | 0.100661 | 0.454806 |
| Summary                    | Ocular musculoskeletal movement (HES)                                | T | 378957 | 2672  | 376429 | 1.16  | 0.151585 | 0.092422 | 0.971    | 1.39     | 0.100977 | 0.456386 |
| Cardiovascular             | Ischaemic stroke (HES and self-reported)                             | T | 378957 | 2968  | 376133 | 0.846 | -0.16709 | 0.101802 | 0.693    | 1.03     | 0.100734 | 0.456386 |
| Cancer                     | Bowens disease (HES and self-reported)                               | T | 378957 | 617   | 378484 | 1.34  | 0.294181 | 0.179312 | 0.944    | 1.91     | 0.100878 | 0.456386 |
| Summary                    | Neoplasms BIN (cancer register)                                      | T | 378957 | 45225 | 333876 | 0.958 | -0.04288 | 0.026237 | 0.91     | 1.01     | 0.102195 | 0.461026 |
| Operations and Procedures  | Other open operations on bile duct                                   | T | 378957 | 1260  | 377841 | 1.24  | 0.214768 | 0.131632 | 0.958    | 1.6      | 0.102768 | 0.462744 |
| Operations and Procedures  | Artificial opening into stomach                                      | T | 378957 | 356   | 378745 | 0.558 | -0.58333 | 0.357786 | 0.277    | 1.13     | 0.10302  | 0.462824 |
| Digestive system           | Pyloric stenosis (HES and self-reported)                             | T | 378957 | 250   | 378851 | 1.54  | 0.43448  | 0.266605 | 0.916    | 2.6      | 0.10317  | 0.462824 |
| Summary                    | Disorders of synovium and tendon (HES)                               | T | 378957 | 8361  | 370740 | 0.908 | -0.096   | 0.058977 | 0.809    | 1.02     | 0.103589 | 0.462857 |
| Summary                    | HESCH Diseases of the nervous system (HES)                           | T | 378957 | 36198 | 342903 | 0.954 | -0.04683 | 0.028813 | 0.902    | 1.01     | 0.10409  | 0.462857 |
| Symptoms                   | Hyperhidrosis (HES)                                                  | T | 378957 | 544   | 378557 | 0.644 | -0.44026 | 0.27091  | 0.379    | 1.09     | 0.104138 | 0.462857 |
| Operations and Procedures  | Cardiac pacemaker system introduced through vein                     | T | 378957 | 2286  | 376815 | 0.827 | -0.18978 | 0.116531 | 0.658    | 1.04     | 0.10341  | 0.462857 |
| Operations and Procedures  | Other drainage of peritoneal cavity                                  | T | 378957 | 2011  | 377090 | 1.19  | 0.17242  | 0.106059 | 0.965    | 1.46     | 0.104012 | 0.462857 |
| Mental health              | Nervous breakdown (HES and self-reported)                            | T | 378957 | 629   | 378472 | 0.671 | -0.39902 | 0.246072 | 0.414    | 1.09     | 0.104902 | 0.465394 |
| Operations and Procedures  | Ankle surgery (self-reported)                                        | T | 378957 | 1003  | 378098 | 0.74  | -0.3005  | 0.18562  | 0.515    | 1.07     | 0.105468 | 0.465409 |
| Operations and Procedures  | Operations on nasolacrimal duct                                      | T | 378957 | 416   | 378685 | 1.42  | 0.347948 | 0.214852 | 0.929    | 2.16     | 0.105345 | 0.465409 |
| Operations and Procedures  | Total prosthetic replacement of hip joint using cement               | T | 378957 | 4901  | 374200 | 0.881 | -0.12668 | 0.078252 | 0.756    | 1.03     | 0.105485 | 0.465409 |
| Summary                    | Viral hepatitis (HES)                                                | T | 378957 | 525   | 378576 | 0.635 | -0.45416 | 0.280982 | 0.366    | 1.1      | 0.10602  | 0.466914 |
| Biological assays          | Basophil percentage                                                  | T | 367073 | NA    | NA     | NA    | 0.013616 | 0.008444 | -0.00293 | 0.030166 | 0.106849 | 0.469707 |
| Medication                 | Hormonal contraceptives for systemic use                             | T | 378957 | 5576  | 373525 | 1.12  | 0.109933 | 0.068283 | 0.976    | 1.28     | 0.107406 | 0.469946 |
| Cancer                     | Mal melanoma of skin (cancer register)                               | T | 378957 | 2611  | 376490 | 0.84  | -0.174   | 0.108231 | 0.68     | 1.04     | 0.107901 | 0.469946 |
| Summary                    | Melanoma and other mal neo of skin (cancer register)                 | T | 378957 | 2611  | 376490 | 0.84  | -0.174   | 0.108231 | 0.68     | 1.04     | 0.107901 | 0.469946 |
| Operations and Procedures  | Abdominal excision of uterus                                         | T | 378957 | 9231  | 369870 | 0.913 | -0.09106 | 0.05667  | 0.817    | 1.02     | 0.108074 | 0.469946 |
| Biological assays          | Sodium in urine                                                      | T | 367322 | NA    | NA     | NA    | -0.01357 | 0.008442 | -0.03012 | 0.002976 | 0.107939 | 0.469946 |
| Respiratory                | FEV1 FVC ratio strict                                                | T | 221584 | NA    | NA     |       |          |          |          |          |          |          |

|                            |                                                                     |   |        |       |        |       |          |          |          |          |          |          |
|----------------------------|---------------------------------------------------------------------|---|--------|-------|--------|-------|----------|----------|----------|----------|----------|----------|
| Operations and Procedures  | Placement of prosthesis in organ NOC                                | T | 378957 | 3165  | 375936 | 0.857 | -0.15392 | 0.0981   | 0.707    | 1.04     | 0.116639 | 0.482602 |
| Immuno-inflammation        | Psoriasis (HES and self-reported)                                   | T | 378957 | 5583  | 373518 | 1.11  | 0.103893 | 0.066301 | 0.974    | 1.26     | 0.117117 | 0.483108 |
| Mental health              | Other anxiety disorders (HES)                                       | T | 378957 | 5413  | 373688 | 0.891 | -0.11559 | 0.074003 | 0.771    | 1.03     | 0.118291 | 0.483647 |
| Digestive system           | Other disorders of gingiva and edentulous alveolar ridge (HES)      | T | 378957 | 283   | 378818 | 0.525 | -0.64416 | 0.412777 | 0.234    | 1.18     | 0.118631 | 0.483647 |
| Medication                 | Drugs used in addictive disorders                                   | T | 378957 | 648   | 378453 | 1.32  | 0.279801 | 0.178977 | 0.931    | 1.88     | 0.117975 | 0.483647 |
| Operations and Procedures  | Excision of tonsil                                                  | T | 378957 | 1168  | 377933 | 0.765 | -0.26822 | 0.171978 | 0.546    | 1.07     | 0.118854 | 0.483647 |
| Operations and Procedures  | Curettage of lesion of skin                                         | T | 378957 | 1798  | 377313 | 1.19  | 0.174532 | 0.111565 | 0.957    | 1.48     | 0.117725 | 0.483647 |
| Operations and Procedures  | Other closed reduction of fracture of bone                          | T | 378957 | 1496  | 377605 | 0.793 | -0.23164 | 0.148516 | 0.593    | 1.06     | 0.118836 | 0.483647 |
| Digestive system           | Other abdominal problem (HES and self-reported)                     | T | 378957 | 39890 | 339211 | 0.958 | -0.04333 | 0.027723 | 0.907    | 1.01     | 0.118096 | 0.483647 |
| Musculoskeletal            | Dupuytren's contracture (HES and self-reported)                     | T | 378957 | 3300  | 375801 | 1.14  | 0.132378 | 0.08468  | 0.967    | 1.35     | 0.117989 | 0.483647 |
| Mental health              | Ever highly irritable argumentative for 2 days                      | T | 123697 | 22263 | 101496 | 0.942 | -0.06008 | 0.038647 | 0.873    | 1.02     | 0.120012 | 0.487536 |
| Summary                    | HESCH Endocrine nutritional and metabolic diseases BIN (HES)        | T | 378957 | 66768 | 312333 | 0.966 | -0.03483 | 0.022446 | 0.924    | 1.01     | 0.120684 | 0.488825 |
| Immuno-inflammation        | Ulcer of lower limb (HES)                                           | T | 378957 | 989   | 378112 | 0.75  | -0.28821 | 0.185739 | 0.521    | 1.08     | 0.120735 | 0.488825 |
| Cardiovascular             | Varicose veins (HES and self-reported)                              | T | 378957 | 11798 | 367303 | 1.07  | 0.072134 | 0.046594 | 0.981    | 1.18     | 0.121586 | 0.491444 |
| Operations and Procedures  | Primary excision of lumbar intervertebral disc                      | T | 378957 | 1796  | 377305 | 0.813 | -0.20699 | 0.133791 | 0.625    | 1.06     | 0.121846 | 0.49167  |
| Genitourinary              | Kidney stone/ureter stone/bladder stone (HES and self-reported)     | T | 378957 | 6694  | 372407 | 0.903 | -0.10243 | 0.066318 | 0.793    | 1.03     | 0.122466 | 0.493278 |
| Digestive system           | Dyspepsia indigestion (HES and self-reported)                       | T | 378957 | 11162 | 367939 | 0.924 | -0.07863 | 0.050934 | 0.837    | 1.02     | 0.122654 | 0.493278 |
| Cardiovascular             | Angiogram not coronary (self-reported)                              | T | 378957 | 345   | 378756 | 0.576 | -0.55155 | 0.357909 | 0.286    | 1.16     | 0.123307 | 0.495078 |
| Operations and Procedures  | Other operations on urethra                                         | T | 378957 | 1489  | 377612 | 0.796 | -0.22846 | 0.148522 | 0.595    | 1.06     | 0.123988 | 0.496984 |
| Operations and Procedures  | Open drainage of bladder                                            | T | 378957 | 606   | 378495 | 1.32  | 0.279652 | 0.181946 | 0.926    | 1.89     | 0.124291 | 0.49737  |
| Medication                 | Psycholeptics and psychoanaesthetics in combination                 | T | 378957 | 12227 | 366874 | 0.928 | -0.07471 | 0.04868  | 0.844    | 1.02     | 0.124839 | 0.497969 |
| Operations and Procedures  | Other operations on mouth                                           | T | 378957 | 1260  | 377841 | 0.779 | -0.25009 | 0.162957 | 0.566    | 1.07     | 0.124854 | 0.497969 |
| Summary                    | Pulmonary heart disease and diseases of pulmonary circulation (HES) | T | 378957 | 3992  | 375109 | 1.13  | 0.118078 | 0.077074 | 0.968    | 1.31     | 0.125251 | 0.498155 |
| Summary                    | Diseases of veins lymphatic vessels (HES)                           | T | 378957 | 35400 | 343701 | 1.04  | 0.043231 | 0.028216 | 0.988    | 1.11     | 0.125479 | 0.498155 |
| Cancer                     | Rectal cancer (self-reported)                                       | T | 378957 | 274   | 378827 | 1.48  | 0.395159 | 0.257933 | 0.895    | 2.46     | 0.125518 | 0.498155 |
| Medication                 | Drugs for peptic ulcer and gastro oesophageal reflux disease/gord   | T | 378957 | 45634 | 333467 | 0.961 | -0.03996 | 0.026212 | 0.913    | 1.01     | 0.127369 | 0.501359 |
| Metabolic                  | Ovarian dysfunction (HES)                                           | T | 378957 | 239   | 378862 | 0.501 | -0.6905  | 0.452466 | 0.207    | 1.22     | 0.126989 | 0.501359 |
| Cancer                     | Neo of other sites (cancer register)                                | T | 378957 | 206   | 378895 | 0.463 | -0.77011 | 0.505091 | 0.172    | 1.25     | 0.127334 | 0.501359 |
| Operations and Procedures  | Therapeutic transluminal operations on other artery                 | T | 378957 | 774   | 378327 | 0.719 | -0.33029 | 0.216516 | 0.47     | 1.1      | 0.127145 | 0.501359 |
| Operations and Procedures  | Endovascular placement of stent                                     | T | 378957 | 370   | 378731 | 0.597 | -0.51526 | 0.33772  | 0.308    | 1.16     | 0.127083 | 0.501359 |
| Metabolic                  | Thyroid goitre (HES and self-reported)                              | T | 378957 | 1793  | 377308 | 0.817 | -0.20232 | 0.132798 | 0.63     | 1.06     | 0.127632 | 0.501575 |
| Operations and Procedures  | Artificial opening into jejunum                                     | T | 378957 | 294   | 378807 | 1.46  | 0.38031  | 0.250202 | 0.896    | 2.39     | 0.128508 | 0.504195 |
| Haematology                | Low platelets/platelet disorder (HES and self-reported)             | T | 378957 | 1618  | 377483 | 1.2   | 0.178629 | 0.118781 | 0.949    | 1.51     | 0.129657 | 0.507876 |
| Digestive system           | Unspecified abdominal hernia (HES)                                  | T | 378957 | 276   | 378825 | 0.535 | -0.62466 | 0.4129   | 0.238    | 1.2      | 0.130318 | 0.508303 |
| Metabolic                  | Thyroid surgery (self-reported)                                     | T | 378957 | 586   | 378515 | 1.32  | 0.279733 | 0.184943 | 0.921    | 1.9      | 0.130399 | 0.508303 |
| Operations and Procedures  | Primary open reduction of traumatic dislocation of joint            | T | 378957 | 347   | 378754 | 1.43  | 0.357339 | 0.236226 | 0.9      | 2.27     | 0.130356 | 0.508303 |
| Neurosciences              | Other nervous system in diseases classified elsewhere (HES)         | T | 378957 | 960   | 378141 | 0.752 | -0.28451 | 0.18882  | 0.52     | 1.09     | 0.131861 | 0.510906 |
| Operations and Procedures  | Examination of bile duct and pancreatic duct                        | T | 378957 | 2192  | 376909 | 1.17  | 0.154228 | 0.102342 | 0.955    | 1.43     | 0.131815 | 0.510906 |
| Cardiovascular             | Transient ischaemic attack/tia (HES and self-reported)              | T | 378957 | 3570  | 375531 | 1.13  | 0.122925 | 0.081591 | 0.964    | 1.33     | 0.131915 | 0.510906 |
| Digestive system           | Oesophagitis/barretts oesophagus (HES and self-reported)            | T | 378957 | 10521 | 368580 | 1.08  | 0.074728 | 0.049266 | 0.978    | 1.19     | 0.131663 | 0.510906 |
| Gynaecology and Obstetrics | Preterm delivery (HES)                                              | T | 378957 | 602   | 378499 | 1.32  | 0.276417 | 0.183988 | 0.919    | 1.89     | 0.133003 | 0.512728 |
| Operations and Procedures  | Packing of cavity of nose                                           | T | 378957 | 1016  | 378085 | 1.24  | 0.218481 | 0.145432 | 0.936    | 1.65     | 0.133024 | 0.512728 |
| Infectious disease         | Herpes simplex (HES and self-reported)                              | T | 378957 | 373   | 378728 | 0.602 | -0.50749 | 0.337608 | 0.311    | 1.17     | 0.132793 | 0.512728 |
| Digestive system           | Other diseases of intestine (HES)                                   | T | 378957 | 13086 | 366015 | 0.932 | -0.07072 | 0.047136 | 0.85     | 1.02     | 0.133516 | 0.513332 |
| Cardiovascular             | Mean carotid IMT intima medial thickness at 150 degrees             | T | 1843   | NA    | NA     | NA    | 0.186925 | 0.124614 | -0.05732 | 0.431168 | 0.133607 | 0.513332 |
| Operations and Procedures  | Diagnostic endos exam of lwr resp trct rigid brnchscope             | T | 378957 | 452   | 378649 | 1.37  | 0.314941 | 0.210077 | 0.908    | 2.07     | 0.133831 | 0.513374 |
| Medication                 | Ace inhibitors plain                                                | T | 378957 | 38569 | 340532 | 0.958 | -0.04251 | 0.028393 | 0.907    | 1.01     | 0.134387 | 0.514358 |
| Musculoskeletal            | Fractured broken bones in last 5 years                              | T | 376884 | 36458 | 340570 | 1.04  | 0.041639 | 0.027828 | 0.987    | 1.1      | 0.134582 | 0.514358 |
| Cardiovascular             | Cholesterol lowering medication                                     | T | 376081 | 64923 | 311299 | 0.966 | -0.03507 | 0.023445 | 0.922    | 1.01     | 0.134728 | 0.514358 |
| Biological assays          | Lymphocyte percentage                                               | T | 367073 | NA    | NA     | NA    | 0.012624 | 0.008445 | -0.00393 | 0.029176 | 0.134965 | 0.514474 |
| Cardiovascular             | Coronary angioplasty ptca stent (self-reported)                     | T | 378957 | 3922  | 375179 | 0.878 | -0.13038 | 0.087284 | 0.74     | 1.04     | 0.135254 | 0.514734 |
| Eye                        | LogMAR final right                                                  | T | 83968  | NA    | NA     | NA    | 0.025952 | 0.017423 | -0.0082  | 0.060101 | 0.136346 | 0.518072 |
| Musculoskeletal            | Psoriatic arthropathy (HES and self-reported)                       | T | 378957 | 1087  | 378014 | 1.24  | 0.211764 | 0.142422 | 0.935    | 1.63     | 0.137049 | 0.519923 |
| Neurosciences              | Alzheimer s disease (HES)                                           | T | 378957 | 359   | 378742 | 1.41  | 0.341188 | 0.230595 | 0.895    | 2.21     | 0.13898  | 0.525593 |
| Mental health              | Risk taking                                                         | T | 365508 | 96122 | 269526 | 1.03  | 0.02895  | 0.01956  | 0.991    | 1.07     | 0.138865 | 0.525593 |
| ENT                        | Suppurative and unspecified otitis media (HES)                      | T | 378957 | 700   | 378401 | 1.29  | 0.25666  | 0.173699 | 0.92     | 1.82     | 0.139511 | 0.52595  |
| Operations and Procedures  | Other bowel surgery (self-reported)                                 | T | 378957 | 2282  | 376819 | 0.842 | -0.17187 | 0.116291 | 0.67     | 1.06     | 0.139424 | 0.52595  |
| Medication                 | Potassium sparing agents                                            | T | 378957 | 950   | 378151 | 0.757 | -0.27833 | 0.188901 | 0.523    | 1.1      | 0.140643 | 0.525982 |
| Infectious disease         | Streptococcal septicemia (HES)                                      | T | 378957 | 235   | 378866 | 0.514 | -0.6654  | 0.452066 | 0.212    | 1.25     | 0.141048 | 0.525982 |
| Gynaecology and Obstetrics | Abnormalities of forces of labour (HES)                             | T | 378957 | 405   | 378696 | 0.636 | -0.45327 | 0.307324 | 0.348    | 1.16     | 0.140243 | 0.525982 |
| Operations and Procedures  | Liver surgery (self-reported)                                       | T | 378957 | 301   | 378800 | 1.44  | 0.367984 | 0.249977 | 0.885    | 2.36     | 0.141001 | 0.525982 |
| Operations and Procedures  | Other upper digestive tract                                         | T | 378957 | 488   | 378613 | 1.35  | 0.297405 | 0.201858 | 0.906    | 2        | 0.140661 | 0.525982 |
| Operations and Procedures  | Branch of external carotid artery                                   | T | 378957 | 271   | 378830 | 1.46  | 0.3811   | 0.258119 | 0.883    | 2.43     | 0.139823 | 0.525982 |
| Operations and Procedures  | Bilateral excision of adnexa of uterus                              | T | 378957 | 8743  | 370358 | 0.918 | -0.08525 | 0.057888 | 0.82     | 1.03     | 0.140834 | 0.525982 |
| Operations and Procedures  | Gallstones removed (self-reported)                                  | T | 378957 | 315   | 378786 | 1.43  | 0.357432 | 0.243108 | 0.888    | 2.3      | 0.141492 | 0.526823 |
| Operations and Procedures  | High cost other cardiovascular drugs                                | T | 378957 | 535   | 378566 | 1.33  | 0.285506 | 0.194461 | 0.909    | 1.95     | 0.142053 | 0.528095 |
| Family history             | Stroke (family history - father)                                    | T | 343458 | 51292 | 292300 | 0.964 | -0.03639 | 0.024821 | 0.918    | 1.01     | 0.142628 | 0.529416 |
| Family history             | Parkinson s disease (family history - father)                       | T | 338597 | 8344  | 330385 | 0.918 | -0.08575 | 0.058596 | 0.818    | 1.03     | 0.143344 | 0.530972 |
| Operations and Procedures  | Placement of stent in organ NOC                                     | T | 378957 | 1320  | 377781 | 1.21  | 0.18956  | 0.129576 | 0.938    | 1.56     | 0.143488 | 0.530972 |
| Operations and Procedures  | Other operations on outlet of male bladder                          | T | 378957 | 6418  | 372683 | 0.906 | -0.09926 | 0.067962 | 0.793    | 1.03     | 0.144139 | 0.532563 |
| Haematology                | Other aplastic anaemias (HES)                                       | T | 378957 | 409   | 378692 | 1.38  | 0.319799 | 0.219484 | 0.895    | 2.12     | 0.145102 | 0.532852 |
| Cardiovascular             | Phlebitis and thrombophlebitis (HES)                                | T | 378957 | 3502  | 375599 | 1.13  | 0.119861 | 0.082193 | 0.96     | 1.32     | 0.144762 | 0.532852 |
| Musculoskeletal            | Pagets disease (HES and self-reported)                              | T | 378957 | 272   | 378829 | 0.548 | -0.60195 | 0.412969 | 0.244    | 1.23     | 0.144946 | 0.532852 |
| Musculoskeletal            | Systemic lupus erythematosissle (HES and self-reported)             | T | 378957 | 547   | 378554 | 1.33  | 0.283607 | 0.194371 | 0.907    | 1.94     | 0.144537 | 0.532852 |
| Eye                        | Disorders of globe (HES)                                            | T | 378957 | 389   | 378712 | 1.38  | 0.320108 | 0.219823 | 0.895    | 2.12     | 0.145336 | 0.532899 |
| Operations and Procedures  | Reconstruction of breast                                            | T | 378957 | 1391  | 377710 | 0.802 | -0.22111 | 0.152011 | 0.595    | 1.08     | 0.145788 | 0.533744 |
| Symptoms                   | Abnormalities of heart beat (HES)                                   | T | 378957 | 7716  | 371385 | 0.915 | -0.08911 | 0.061339 | 0.811    | 1.03     | 0.146301 | 0.533999 |
| ENT                        | Toothache                                                           | T | 377502 | 15330 | 362316 | 1.06  | 0.060128 | 0.041382 | 0.979    | 1.15     | 0.146225 | 0.533999 |
| Gynaecology and Obstetrics | Cone biopsy (self-reported)                                         | T | 378957 | 3152  | 375949 | 0.868 | -0.14121 | 0.097341 | 0.717    | 1.05     | 0.146868 | 0.535257 |
| Genitourinary              | Scrotal problem not cancer (HES and self-reported)                  | T | 378957 | 1382  | 377719 | 1.2   | 0.185123 | 0.127756 | 0.937    | 1.55     | 0.147329 | 0.536126 |
| Biological assays          | Lymphocyte count                                                    | T | 367067 | NA    | NA     | NA    | 0.012206 | 0.008441 | -0.00434 | 0.028751 | 0.148153 | 0.538312 |
| Cardiovascular             | Rheumatic tricuspid valve diseases (HES)                            | T | 378957 | 262   | 378839 | 1.47  | 0.383673 | 0.266211 | 0.871    | 2.47     | 0.149518 | 0.539259 |
| Immuno-inflammation        | Atrophic disorders of skin (HES)                                    | T | 378957 | 2542  | 376559 | 1.15  | 0.137638 | 0.095495 | 0.952    | 1.38     | 0.149494 | 0.539259 |
| Operations and Procedures  | Endoscopic of lower bowel                                           | T | 378957 | 3536  | 375565 | 0.876 | -0.13265 | 0.091931 | 0.731    | 1.05     | 0.149036 | 0.539259 |
| Genitourinary              | Other renalkidney problem (HES and self-reported)                   | T | 378957 | 5423  | 373678 | 1.1   | 0.096813 | 0.061716 | 0.966    | 1.26     | 0.149533 | 0.539259 |
| Biological assays          | Basophil count                                                      | T | 367067 | NA    | NA     | NA    | 0.01215  | 0.008413 | -0.00434 | 0.028638 | 0.148663 | 0.539259 |
| ENT                        | Tinnitus/tinitis (HES and self-reported)                            | T | 378957 | 1088  | 378013 | 1.23  | 0.203095 | 0.14119  | 0.929    | 1.62     | 0.150307 | 0.540803 |
| Musculoskeletal            | Fracture ulna (HES and self-reported)                               | T | 378957 | 1643  | 37745  |       |          |          |          |          |          |          |

|                            |                                                                         |   |        |        |        |        |          |          |          |          |          |          |          |
|----------------------------|-------------------------------------------------------------------------|---|--------|--------|--------|--------|----------|----------|----------|----------|----------|----------|----------|
| Summary                    | Symptoms and signs involving speech and voice (HES)                     | T | 378957 | 2293   | 376808 | 0.852  | -0.1607  | 0.115585 | 0.679    | 1.07     | 0.164444 | 0.558322 |          |
| Digestive system           | Other functional intestinal disorders (HES)                             | T | 378957 | 10172  | 368929 | 0.929  | -0.07412 | 0.053381 | 0.836    | 1.03     | 0.164999 | 0.558322 |          |
| Gynaecology and Obstetrics | Medical abortion (HES)                                                  | T | 378957 | 998    | 378103 | 0.774  | -0.2557  | 0.184294 | 0.54     | 1.11     | 0.165305 | 0.558322 |          |
| Gynaecology and Obstetrics | Breast surgery (self-reported)                                          | T | 378957 | 1320   | 377781 | 0.806  | -0.21583 | 0.155514 | 0.594    | 1.09     | 0.165177 | 0.558322 |          |
| Operations and Procedures  | Hip surgery not replacement (self-reported)                             | T | 378957 | 1523   | 377578 | 1.18   | 0.168788 | 0.121094 | 0.934    | 1.5      | 0.163359 | 0.558322 |          |
| ENT                        | Tympanic membrane surgery ear drum repair (self-reported)               | T | 378957 | 602    | 378499 | 1.29   | 0.257477 | 0.184698 | 0.901    | 1.86     | 0.163304 | 0.558322 |          |
| Family history             | Alzheimer s disease dementia (family history - sibling)                 | T | 300905 | 1677   | 299352 | 0.827  | -0.18963 | 0.136644 | 0.633    | 1.08     | 0.165202 | 0.558322 |          |
| Operations and Procedures  | Therapeutic endoscopic operations on calculus of kidney                 | T | 378957 | 417    | 378684 | 0.654  | -0.42408 | 0.305785 | 0.359    | 1.19     | 0.165482 | 0.558322 |          |
| Operations and Procedures  | Diagnostic endoscopic examination of bladder                            | T | 378957 | 30109  | 348992 | 1.04   | 0.042698 | 0.030553 | 0.983    | 1.11     | 0.162252 | 0.558322 |          |
| Operations and Procedures  | High cost haematology and nutrition drugs                               | T | 378957 | 606    | 378495 | 1.29   | 0.255984 | 0.184678 | 0.899    | 1.86     | 0.165712 | 0.558322 |          |
| Operations and Procedures  | Injection of other substance into organ NOC                             | T | 378957 | 1838   | 377263 | 0.834  | -0.181   | 0.129555 | 0.647    | 1.08     | 0.162394 | 0.558322 |          |
| NA                         | Subarachnoid haemorrhage                                                | T | 378957 | 982    | 378119 | 1.23   | 0.208587 | 0.149801 | 0.918    | 1.65     | 0.163794 | 0.558322 |          |
| Neurosciences              | Meningitis (HES and self-reported)                                      | T | 378957 | 1714   | 377387 | 0.829  | -0.18778 | 0.13501  | 0.636    | 1.08     | 0.164277 | 0.558322 |          |
| Digestive system           | Diverticular diseasediverticulitis (HES and self-reported)              | T | 378957 | 26531  | 352570 | 0.954  | -0.04673 | 0.033521 | 0.894    | 1.02     | 0.163277 | 0.558322 |          |
| Neurosciences              | Polio poliomyelitis (HES and self-reported)                             | T | 378957 | 280    | 378821 | 0.588  | -0.53083 | 0.382952 | 0.278    | 1.25     | 0.165698 | 0.558322 |          |
| Digestive system           | Bowel intestinal infarction (HES and self-reported)                     | T | 378957 | 264    | 378837 | 0.564  | -0.57347 | 0.413106 | 0.251    | 1.27     | 0.165081 | 0.558322 |          |
| Summary                    | Other disorders of the skin and subcutaneous tissue (HES)               | T | 378957 | 14568  | 364533 | 1.06   | 0.058335 | 0.042222 | 0.976    | 1.15     | 0.167086 | 0.559042 |          |
| Symptoms                   | Abnormal serum enzyme levels (HES)                                      | T | 378957 | 226    | 378875 | 1.49   | 0.395794 | 0.285985 | 0.848    | 2.6      | 0.166368 | 0.559042 |          |
| Gynaecology and Obstetrics | Mastectomy (self-reported)                                              | T | 378957 | 3844   | 375257 | 0.886  | -0.12097 | 0.087551 | 0.746    | 1.05     | 0.167078 | 0.559042 |          |
| Operations and Procedures  | Haemorrhoidectomy piles surgery banding of piles (self-reported)        | T | 378957 | 6713   | 372388 | 1.09   | 0.084213 | 0.060893 | 0.965    | 1.23     | 0.166672 | 0.559042 |          |
| Family history             | Bowel cancer (family history - sibling)                                 | T | 301109 | 7001   | 294235 | 0.914  | -0.0895  | 0.064707 | 0.805    | 1.04     | 0.166615 | 0.559042 |          |
| Medication                 | Androgens and female sex hormones in combination                        | T | 378957 | 421    | 378680 | 0.656  | -0.4214  | 0.30576  | 0.36     | 1.19     | 0.168135 | 0.55941  |          |
| Eye                        | Retinal disorders in diseases classified elsewhere (HES)                | T | 378957 | 1229   | 378772 | 0.801  | -0.22192 | 0.161106 | 0.584    | 1.1      | 0.168357 | 0.55941  |          |
| Gynaecology and Obstetrics | Salpingectomy (self-reported)                                           | T | 378957 | 258    | 378843 | 0.565  | -0.57033 | 0.413332 | 0.251    | 1.27     | 0.167636 | 0.55941  |          |
| Operations and Procedures  | Operations on external nose                                             | T | 378957 | 3310   | 375791 | 1.12   | 0.116629 | 0.084627 | 0.952    | 1.33     | 0.168158 | 0.55941  |          |
| Mental health              | Depression (HES and self-reported)                                      | T | 378957 | 27882  | 351219 | 0.956  | -0.04487 | 0.032561 | 0.897    | 1.02     | 0.168174 | 0.55941  |          |
| Musculoskeletal            | Other systemic involvement of connective tissue (HES)                   | T | 378957 | 1710   | 377391 | 1.17   | 0.158198 | 0.115037 | 0.935    | 1.47     | 0.169071 | 0.561008 |          |
| Summary                    | Disorders of muscles (HES)                                              | T | 378957 | 1025   | 378076 | 0.781  | -0.24671 | 0.179866 | 0.549    | 1.11     | 0.170171 | 0.561663 |          |
| Genitourinary              | Pain with female genital (HES)                                          | T | 378957 | 3073   | 376028 | 0.873  | -0.13542 | 0.098588 | 0.72     | 1.06     | 0.169556 | 0.561663 |          |
| ENT                        | Loose teeth                                                             | T | 377502 | 15091  | 362555 | 0.942  | -0.06002 | 0.043762 | 0.864    | 1.03     | 0.170201 | 0.561663 |          |
| Digestive system           | Femoral hernia (HES and self-reported)                                  | T | 378957 | 643    | 378458 | 0.726  | -0.31981 | 0.233112 | 0.46     | 1.15     | 0.170086 | 0.561663 |          |
| Operations and Procedures  | Excision of vas deferens                                                | T | 378957 | 4286   | 374815 | 0.887  | -0.1194  | 0.08729  | 0.748    | 1.05     | 0.171369 | 0.564744 |          |
| Genitourinary              | Urethral stricture (HES)                                                | T | 378957 | 2967   | 376134 | 0.871  | -0.13762 | 0.100733 | 0.715    | 1.06     | 0.171891 | 0.566613 |          |
| Operations and Procedures  | Closed reduction of fracture of bone and external fixation              | T | 378957 | 391    | 378710 | 0.646  | -0.43757 | 0.320542 | 0.344    | 1.21     | 0.172224 | 0.566013 |          |
| Medication                 | Progestogens and estrogens in combination                               | T | 378957 | 8666   | 370435 | 1.08   | 0.074308 | 0.054616 | 0.968    | 1.2      | 0.173653 | 0.567844 |          |
| Operations and Procedures  | Exenteration of mastoid air cells                                       | T | 378957 | 445    | 378656 | 1.34   | 0.29162  | 0.214374 | 0.879    | 2.04     | 0.173724 | 0.567844 |          |
| Operations and Procedures  | Other operations on rectum                                              | T | 378957 | 894    | 378207 | 1.24   | 0.213246 | 0.156657 | 0.91     | 1.68     | 0.173443 | 0.567844 |          |
| Operations and Procedures  | Percutaneous puncture of kidney                                         | T | 378957 | 1437   | 377664 | 1.19   | 0.170905 | 0.125489 | 0.928    | 1.52     | 0.173227 | 0.567844 |          |
| Eye                        | Iritis (HES and self-reported)                                          | T | 378957 | 479    | 378622 | 1.32   | 0.279423 | 0.205714 | 0.884    | 1.98     | 0.174366 | 0.5684   |          |
| Neurosciences              | Meningioma benign meningial tumour (HES and self-reported)              | T | 378957 | 499    | 378602 | 0.692  | -0.36867 | 0.271325 | 0.406    | 1.18     | 0.174218 | 0.5684   |          |
| Medication                 | Antidepressants                                                         | T | 378957 | 29214  | 349887 | 0.958  | -0.04315 | 0.031841 | 0.9      | 1.02     | 0.175346 | 0.570822 |          |
| Digestive system           | Cysts of oral region (HES)                                              | T | 378957 | 377    | 378724 | 0.649  | -0.43303 | 0.320695 | 0.346    | 1.22     | 0.176922 | 0.5744   |          |
| Symptoms                   | Disturbances of skin sensation (HES)                                    | T | 378957 | 2617   | 376484 | 0.865  | -0.14534 | 0.107632 | 0.7      | 1.07     | 0.176906 | 0.5744   |          |
| Medication                 | Antipruritics incl antihistamines anaesthetics etc                      | T | 378957 | 592    | 378509 | 1.29   | 0.253218 | 0.187664 | 0.892    | 1.86     | 0.177236 | 0.574645 |          |
| Medication                 | Chemotherapeutics for topical use                                       | T | 378957 | 1020   | 378081 | 0.785  | -0.24237 | 0.179791 | 0.552    | 1.12     | 0.177632 | 0.575155 |          |
| Genitourinary              | Other abnormal uterine and vaginal bleeding (HES)                       | T | 378957 | 3736   | 375365 | 0.887  | -0.12006 | 0.08919  | 0.745    | 1.06     | 0.178267 | 0.576437 |          |
| Summary                    | Other bacterial diseases (HES)                                          | T | 378957 | 4393   | 374708 | 1.11   | 0.09993  | 0.0744   | 0.955    | 1.28     | 0.179227 | 0.577082 |          |
| Haematology                | Purpura and other haemorrhagic conditions (HES)                         | T | 378957 | 1530   | 377571 | 1.18   | 0.16348  | 0.121901 | 0.927    | 1.5      | 0.179891 | 0.577082 |          |
| Metabolic                  | Obesity (HES)                                                           | T | 378957 | 9864   | 369237 | 0.93   | -0.07248 | 0.053913 | 0.837    | 1.03     | 0.178809 | 0.577082 |          |
| Cancer                     | Bladder cancer (self-reported)                                          | T | 378957 | 892    | 378209 | 1.23   | 0.208456 | 0.15515  | 0.909    | 1.67     | 0.179087 | 0.577082 |          |
| Operations and Procedures  | Removal of mole skin lesion (self-reported)                             | T | 378957 | 5310   | 373791 | 1.1    | 0.0914   | 0.068107 | 0.959    | 1.25     | 0.179595 | 0.577082 |          |
| Musculoskeletal            | Back problem (HES and self-reported)                                    | T | 378957 | 11524  | 367577 | 0.935  | -0.06685 | 0.049833 | 0.848    | 1.03     | 0.179904 | 0.577082 |          |
| Musculoskeletal            | Fracture fibula (HES and self-reported)                                 | T | 378957 | 749    | 378352 | 1.25   | 0.225812 | 0.168918 | 0.9      | 1.75     | 0.181284 | 0.580736 |          |
| Medication                 | Antithrombotic agents                                                   | T | 378957 | 59142  | 319959 | 0.968  | -0.03209 | 0.024033 | 0.924    | 1.02     | 0.181737 | 0.581077 |          |
| Medication                 | Paracetamol                                                             | T | 378957 | 374624 | 81842  | 292926 | 1.03     | 0.027078 | 0.020283 | 0.987    | 1.07     | 0.181873 | 0.581077 |
| Genitourinary              | Anal fissure (HES and self-reported)                                    | T | 378957 | 269    | 378832 | 1.42   | 0.354143 | 0.265976 | 0.846    | 2.4      | 0.183029 | 0.583996 |          |
| Cardiovascular             | Carotid artery surgery endarterectomy (self-reported)                   | T | 378957 | 226    | 378875 | 0.548  | -0.6017  | 0.452496 | 0.226    | 1.33     | 0.183607 | 0.585065 |          |
| Operations and Procedures  | Renal kidney transplant (self-reported)                                 | T | 378957 | 252    | 378849 | 1.44   | 0.365637 | 0.275282 | 0.84     | 2.47     | 0.184104 | 0.585874 |          |
| Family history             | Father s age at death                                                   | T | 278443 | NA     | NA     | NA     | 0.012808 | 0.009662 | -0.00613 | 0.031746 | 0.184969 | 0.58785  |          |
| Operations and Procedures  | Hand finger surgery (self-reported)                                     | T | 378957 | 1664   | 377437 | 0.835  | -0.18046 | 0.136264 | 0.639    | 1.09     | 0.185395 | 0.588417 |          |
| Operations and Procedures  | Extirpation of lesion of bone                                           | T | 378957 | 466    | 378635 | 0.689  | -0.37249 | 0.281419 | 0.397    | 1.2      | 0.185636 | 0.588417 |          |
| Musculoskeletal            | Osteonecrosis (HES)                                                     | T | 378957 | 512    | 378589 | 1.3    | 0.2661   | 0.201556 | 0.879    | 1.94     | 0.18676  | 0.590426 |          |
| Immuno-inflammation        | Chronic skin ulcers (HES and self-reported)                             | T | 378957 | 1331   | 377770 | 0.816  | -0.20292 | 0.153674 | 0.604    | 1.1      | 0.186674 | 0.590426 |          |
| Family history             | Bowel cancer (family history)                                           | T | 378957 | NA     | NA     | NA     | -0.01092 | 0.008285 | -0.02716 | 0.005318 | 0.187452 | 0.591837 |          |
| Eye                        | Other strabismus (HES)                                                  | T | 378957 | 823    | 378278 | 1.24   | 0.213913 | 0.162385 | 0.901    | 1.7      | 0.187732 | 0.591946 |          |
| Neurosciences              | Other disorders of brain (HES)                                          | T | 378957 | 1438   | 377663 | 1.18   | 0.16504  | 0.125448 | 0.922    | 1.51     | 0.188307 | 0.592162 |          |
| Operations and Procedures  | Repair of other hernia of abdominal wall                                | T | 378957 | 1344   | 377757 | 1.19   | 0.170118 | 0.129375 | 0.92     | 1.53     | 0.188538 | 0.592162 |          |
| Infectious disease         | Measles morbillivirus (HES and self-reported)                           | T | 378957 | 1296   | 377805 | 1.19   | 0.170411 | 0.129521 | 0.92     | 1.53     | 0.188274 | 0.592162 |          |
| Gynaecology and Obstetrics | Labour and delivery complicated by umbilical cord complications (HES)   | T | 378957 | 570    | 378531 | 1.28   | 0.249095 | 0.189656 | 0.885    | 1.86     | 0.189048 | 0.59299  |          |
| Operations and Procedures  | Colposcopy biopsy (self-reported)                                       | T | 378957 | 1641   | 377460 | 0.835  | -0.18053 | 0.137682 | 0.637    | 1.09     | 0.189786 | 0.593239 |          |
| Operations and Procedures  | Attention to prosthesis in organ NOC                                    | T | 378957 | 2929   | 376172 | 1.13   | 0.117824 | 0.089848 | 0.943    | 1.34     | 0.189735 | 0.593239 |          |
| Neurosciences              | Acute infective polyneuritisgullainbarre syndro (HES and self-reported) | T | 378957 | 290    | 378811 | 1.4    | 0.337535 | 0.257469 | 0.846    | 2.32     | 0.189866 | 0.593239 |          |
| Operations and Procedures  | Release of entrapment of peripheral nerve at other site                 | T | 378957 | 778    | 378323 | 1.24   | 0.218322 | 0.166629 | 0.897    | 1.72     | 0.19012  | 0.593263 |          |
| Gynaecology and Obstetrics | Cervical polyps removed (self-reported)                                 | T | 378957 | 370    | 378731 | 1.35   | 0.301486 | 0.230359 | 0.861    | 2.12     | 0.190613 | 0.593812 |          |
| Operations and Procedures  | Plastic excision of skin of head or neck                                | T | 378957 | 208    | 378893 | 1.48   | 0.389393 | 0.297645 | 0.824    | 2.65     | 0.190789 | 0.593812 |          |
| ENT                        | Sinus surgery (self-reported)                                           | T | 378957 | 1301   | 377800 | 1.19   | 0.170534 | 0.130482 | 0.918    | 1.53     | 0.191229 | 0.594414 |          |
| Operations and Procedures  | Other diagnostic imaging of genitourinary system                        | T | 378957 | 209    | 378892 | 1.48   | 0.388667 | 0.297612 | 0.823    | 2.64     | 0.191569 | 0.594703 |          |
| Summary                    | HEsCH Diseases of the eye and adnexa (HES)                              | T | 378957 | 35574  | 343527 | 1.04   | 0.037109 | 0.028493 | 0.981    | 1.1      | 0.192784 | 0.595406 |          |
| Immuno-inflammation        | Lichen planus (HES)                                                     | T | 378957 | 501    | 378600 | 0.702  | -0.35384 | 0.271311 | 0.412    | 1.19     | 0.192176 | 0.595406 |          |
| Symptoms                   | Voice disturbances (HES)                                                | T | 378957 | 934    | 378167 | 0.782  | -0.24618 | 0.18892  | 0.54     | 1.13     | 0.192544 | 0.595406 |          |
| Operations and Procedures  | Plastic operations on cornea                                            | T | 378957 | 258    | 378843 | 0.584  | -0.53842 | 0.413245 | 0.26     | 1.31     | 0.19261  | 0.595406 |          |
| Family history             | High blood pressure (family history - sibling)                          | T | 300905 | 61052  | 239977 | 0.97   | -0.03071 | 0.023592 | 0.926    | 1.02     | 0.193063 | 0.595504 |          |
| Operations and Procedures  | Diagnostic imaging of chest                                             | T | 378957 | 2157   | 376944 | 1.15   | 0.135762 | 0.104384 | 0.933    | 1.41     | 0.193396 | 0.595768 |          |
| Medication                 | Selective calcium channel blockers with mainly vascular effects         | T | 378957 | 24151  | 354950 | 0.955  | -0.04555 | 0.035094 | 0.892    | 1.02     | 0.194295 | 0.59618  |          |
| Cardiovascular             | Other diseases of pericardium (HES)                                     | T | 378957 | 973    | 378128 | 0.789  | -0.23707 | 0.182837 | 0.551    | 1.13     | 0.194767 | 0.59618  |          |
| Cancer                     | Lymphoid leukaemia (cancer register)                                    | T | 378957 | 519    | 378582 | 0.712  | -0.34007 | 0.262276 | 0.426    | 1.19     | 0.19476  | 0.59618  |          |
| Operations and Procedures  | Microscopically controlled excision of lesion of skin                   | T | 378957 | 920    | 378181 | 1.22   | 0.19881  | 0.153216 | 0.903    | 1.65     | 0.194431 | 0.59618  |          |
| Operations and Procedures  | Excision of other fascia                                                | T | 378957 | 2947   | 376154 | 1.12   | 0.116946 |          |          |          |          |          |          |

|                            |                                                                        |   |        |       |        |       |          |          |          |          |          |          |
|----------------------------|------------------------------------------------------------------------|---|--------|-------|--------|-------|----------|----------|----------|----------|----------|----------|
| ENT                        | Disorders of vestibular function (HES)                                 | T | 378957 | 871   | 378230 | 1.22  | 0.200361 | 0.158482 | 0.896    | 1.67     | 0.206139 | 0.60782  |
| Operations and Procedures  | Therapeutic endoscopic operations on cavity of other joint             | T | 378957 | 583   | 378518 | 1.27  | 0.240993 | 0.190763 | 0.876    | 1.85     | 0.206476 | 0.60809  |
| Operations and Procedures  | Diagnostic endoscopic examination of mediastinum                       | T | 378957 | 587   | 378514 | 1.27  | 0.239974 | 0.190794 | 0.875    | 1.85     | 0.208478 | 0.613216 |
| Genitourinary              | Excessive frequent and irregular menstruation (HES)                    | T | 378957 | 11974 | 367127 | 0.939 | -0.06246 | 0.049899 | 0.852    | 1.04     | 0.210683 | 0.618192 |
| Digestive system           | Abdominal hernia (HES and self-reported)                               | T | 378957 | 20644 | 358457 | 1.05  | 0.045974 | 0.036725 | 0.974    | 1.13     | 0.210618 | 0.618192 |
| Summary                    | Infections sexual mode of transmission (HES)                           | T | 378957 | 253   | 378848 | 0.597 | -0.51592 | 0.143316 | 0.266    | 1.34     | 0.211939 | 0.621121 |
| Summary                    | Obesity and other hyperalimentionation (HES)                           | T | 378957 | 9921  | 369180 | 0.935 | -0.06689 | 0.053635 | 0.842    | 1.04     | 0.212348 | 0.621189 |
| Respiratory                | Pleural plaque (HES)                                                   | T | 378957 | 645   | 378456 | 1.25  | 0.227069 | 0.182124 | 0.878    | 1.79     | 0.212478 | 0.621189 |
| Family history             | Stroke (family history - sibling)                                      | T | 300905 | 9517  | 291512 | 0.933 | -0.06888 | 0.055299 | 0.838    | 1.04     | 0.212945 | 0.621799 |
| Cancer                     | Mal neo bladder (cancer register)                                      | T | 378957 | 919   | 378182 | 1.21  | 0.190607 | 0.153484 | 0.896    | 1.63     | 0.214286 | 0.624958 |
| Operations and Procedures  | Appendicectomy (self-reported)                                         | T | 378957 | 45428 | 333673 | 1.03  | 0.031515 | 0.025392 | 0.982    | 1.08     | 0.214561 | 0.625003 |
| Medication                 | Cardiac stimulants excl cardiac glycosides                             | T | 378957 | 304   | 378797 | 0.641 | -0.44436 | 0.358494 | 0.318    | 1.29     | 0.215157 | 0.625048 |
| Summary                    | Symptoms circulatory and respiratory systems (HES)                     | T | 378957 | 45652 | 334449 | 0.968 | -0.03216 | 0.026022 | 0.92     | 1.02     | 0.216562 | 0.625048 |
| Musculoskeletal            | Other joint disorders (HES)                                            | T | 378957 | 11928 | 367173 | 0.941 | -0.06048 | 0.048937 | 0.855    | 1.04     | 0.216484 | 0.625048 |
| Musculoskeletal            | Systemic lupus erythematosus (HES)                                     | T | 378957 | 324   | 378777 | 1.36  | 0.308692 | 0.249493 | 0.835    | 2.22     | 0.215984 | 0.625048 |
| Operations and Procedures  | Reconstruction of breast using abdominal flap                          | T | 378957 | 275   | 378826 | 0.623 | -0.47338 | 0.383152 | 0.294    | 1.32     | 0.216652 | 0.625048 |
| Operations and Procedures  | Injection into varicose vein of leg                                    | T | 378957 | 823   | 378278 | 1.23  | 0.203299 | 0.164392 | 0.888    | 1.69     | 0.216207 | 0.625048 |
| Operations and Procedures  | Other excision of testis                                               | T | 378957 | 508   | 378593 | 1.29  | 0.254381 | 0.205623 | 0.862    | 1.93     | 0.216043 | 0.625048 |
| Respiratory                | Pneumothorax (HES and self-reported)                                   | T | 378957 | 906   | 378195 | 1.21  | 0.194233 | 0.156599 | 0.893    | 1.65     | 0.214859 | 0.625048 |
| Haematology                | Aplastic anaemia (HES and self-reported)                               | T | 378957 | 429   | 378672 | 1.31  | 0.270422 | 0.219184 | 0.853    | 2.01     | 0.217291 | 0.626141 |
| Operations and Procedures  | Other operations on mastoid                                            | T | 378957 | 342   | 378759 | 1.35  | 0.29889  | 0.24242  | 0.838    | 2.17     | 0.217598 | 0.626277 |
| Summary                    | Congenital malformations of the circulatory system (HES)               | T | 378957 | 1083  | 378018 | 1.19  | 0.176928 | 0.143746 | 0.9      | 1.58     | 0.218382 | 0.627742 |
| Digestive system           | Other disorders of teeth and supporting structures (HES)               | T | 378957 | 2410  | 376691 | 1.13  | 0.122087 | 0.0993   | 0.93     | 1.37     | 0.218889 | 0.627742 |
| Operations and Procedures  | Manipulation of rectum                                                 | T | 378957 | 1760  | 377341 | 1.15  | 0.141996 | 0.11548  | 0.919    | 1.45     | 0.21884  | 0.627742 |
| Respiratory                | Pulmonary oedema (HES)                                                 | T | 378957 | 428   | 378673 | 0.698 | -0.35916 | 0.293056 | 0.393    | 1.24     | 0.220356 | 0.631121 |
| Genitourinary              | Polyp of female genital tract (HES)                                    | T | 378957 | 9793  | 369308 | 1.06  | 0.06291  | 0.051404 | 0.963    | 1.18     | 0.221015 | 0.631121 |
| Operations and Procedures  | Pituitary surgery (self-reported)                                      | T | 378957 | 215   | 378886 | 0.575 | -0.5535  | 0.452583 | 0.237    | 1.4      | 0.221338 | 0.631121 |
| Operations and Procedures  | Other operations on breast                                             | T | 378957 | 910   | 378191 | 0.794 | -0.23127 | 0.189123 | 0.548    | 1.15     | 0.221377 | 0.631121 |
| Operations and Procedures  | Open drainage of peritonem                                             | T | 378957 | 297   | 378804 | 1.37  | 0.314985 | 0.25728  | 0.828    | 2.27     | 0.220843 | 0.631121 |
| Medication                 | Progestogens                                                           | T | 378957 | 2010  | 377091 | 1.14  | 0.131908 | 0.108237 | 0.923    | 1.41     | 0.22296  | 0.631144 |
| Cardiovascular             | Arterial embolism and thrombosis (HES)                                 | T | 378957 | 839   | 378262 | 0.784 | -0.24372 | 0.199577 | 0.53     | 1.16     | 0.222026 | 0.631144 |
| Musculoskeletal            | Other disorders of muscle (HES)                                        | T | 378957 | 806   | 378295 | 0.781 | -0.24763 | 0.203423 | 0.524    | 1.16     | 0.223481 | 0.631144 |
| Gynaecology and Obstetrics | Long labour (HES)                                                      | T | 378957 | 1773  | 377328 | 0.851 | -0.16097 | 0.131891 | 0.657    | 1.1      | 0.222283 | 0.631144 |
| Cancer                     | Cin pr cancer cells cervix (self-reported)                             | T | 378957 | 1313  | 377788 | 0.831 | -0.18529 | 0.152209 | 0.617    | 1.12     | 0.223478 | 0.631144 |
| Cardiovascular             | Blood pressure medication                                              | T | 376081 | 77608 | 298614 | 0.974 | -0.02635 | 0.021636 | 0.934    | 1.02     | 0.223189 | 0.631144 |
| Digestive system           | Oesophageal varices (HES and self-reported)                            | T | 378957 | 501   | 378600 | 1.29  | 0.250797 | 0.205493 | 0.859    | 1.92     | 0.222287 | 0.631144 |
| Other                      | Other substance abuse dependency (HES and self-reported)               | T | 378957 | 10328 | 368773 | 0.937 | -0.06456 | 0.053018 | 0.845    | 1.04     | 0.223351 | 0.631144 |
| Gynaecology and Obstetrics | Other disorders of amniotic fluid and membranes (HES)                  | T | 378957 | 236   | 378865 | 0.604 | -0.5042  | 0.414571 | 0.268    | 1.36     | 0.223909 | 0.631335 |
| Genitourinary              | Renal failure requiring dialysis (HES and self-reported)               | T | 378957 | 660   | 378441 | 0.759 | -0.27634 | 0.227301 | 0.486    | 1.18     | 0.224078 | 0.631335 |
| Operations and Procedures  | Excision or biopsy of lymph node                                       | T | 378957 | 6160  | 372941 | 0.921 | -0.08282 | 0.068293 | 0.805    | 1.05     | 0.225266 | 0.633955 |
| Mental health              | Mental and behavioural disorders due to use of tobacco (HES)           | T | 378957 | 10134 | 368967 | 0.937 | -0.0648  | 0.053495 | 0.844    | 1.04     | 0.225751 | 0.634579 |
| Gynaecology and Obstetrics | Other obstructed labour (HES)                                          | T | 378957 | 309   | 378792 | 1.36  | 0.304136 | 0.25136  | 0.828    | 2.22     | 0.226292 | 0.635358 |
| Neurosciences              | Anorexia/bulimia/other eating disorder (HES and self-reported)         | T | 378957 | 336   | 378765 | 1.34  | 0.293249 | 0.242737 | 0.833    | 2.16     | 0.227011 | 0.636635 |
| Neurosciences              | Other extrapyramidal and movement disorders (HES)                      | T | 378957 | 562   | 378539 | 0.743 | -0.29734 | 0.246484 | 0.458    | 1.2      | 0.227695 | 0.63671  |
| Genitourinary              | Tubulo interstitial nephritis not specified as acute or chronic (HES)  | T | 378957 | 837   | 378264 | 1.22  | 0.195764 | 0.162347 | 0.885    | 1.67     | 0.227882 | 0.63671  |
| Metabolic                  | Parathyroidectomy (self-reported)                                      | T | 378957 | 531   | 378570 | 0.736 | -0.30629 | 0.254123 | 0.447    | 1.21     | 0.228095 | 0.63671  |
| Respiratory                | Asbestosis (HES and self-reported)                                     | T | 378957 | 271   | 378830 | 0.63  | -0.4623  | 0.38345  | 0.297    | 1.34     | 0.227964 | 0.63671  |
| Gynaecology and Obstetrics | Placental disorders (HES)                                              | T | 378957 | 225   | 378876 | 1.41  | 0.345143 | 0.287568 | 0.804    | 2.48     | 0.230058 | 0.638396 |
| Medication                 | Immunosuppressants                                                     | T | 378957 | 3722  | 375379 | 1.1   | 0.096793 | 0.080816 | 0.94     | 1.29     | 0.231036 | 0.638396 |
| Family history             | Prostate cancer (family history - father)                              | T | 338597 | 25442 | 313287 | 0.96  | -0.04039 | 0.033765 | 0.899    | 1.03     | 0.231614 | 0.638396 |
| Cancer                     | Carc in situ of other sites (cancer register)                          | T | 378957 | 561   | 378540 | 0.744 | -0.2955  | 0.246691 | 0.459    | 1.21     | 0.230979 | 0.638396 |
| Operations and Procedures  | Other repair of bladder                                                | T | 378957 | 216   | 378885 | 1.43  | 0.355896 | 0.297301 | 0.797    | 2.56     | 0.231272 | 0.638396 |
| Operations and Procedures  | Operations on bursa                                                    | T | 378957 | 1825  | 377276 | 0.857 | -0.15425 | 0.128556 | 0.666    | 1.1      | 0.230196 | 0.638396 |
| Operations and Procedures  | Operations on sentinel lymph node                                      | T | 378957 | 1143  | 377958 | 0.82  | -0.19838 | 0.165421 | 0.593    | 1.13     | 0.23043  | 0.638396 |
| Operations and Procedures  | Minimal access to other body cavity                                    | T | 378957 | 8899  | 370202 | 1.07  | 0.064142 | 0.053406 | 0.96     | 1.18     | 0.229739 | 0.638396 |
| Metabolic                  | Insulin                                                                | T | 376081 | 3934  | 372288 | 0.902 | -0.10336 | 0.085971 | 0.762    | 1.07     | 0.229255 | 0.638396 |
| Digestive system           | Umbilical hernia (HES and self-reported)                               | T | 378957 | 3644  | 375457 | 0.898 | -0.10713 | 0.089536 | 0.754    | 1.07     | 0.231481 | 0.638396 |
| Immuno-inflammation        | Lichen planus (HES and self-reported)                                  | T | 378957 | 627   | 378474 | 0.756 | -0.27934 | 0.23321  | 0.479    | 1.19     | 0.230985 | 0.638396 |
| Neurosciences              | Stomach or abdominal pain                                              | T | 378087 | 37960 | 340271 | 1.03  | 0.032911 | 0.027555 | 0.979    | 1.09     | 0.232325 | 0.639624 |
| Summary                    | Other diseases of blood and blood forming organs (HES)                 | T | 378957 | 4191  | 374910 | 1.1   | 0.090819 | 0.076319 | 0.943    | 1.27     | 0.234047 | 0.639976 |
| Medication                 | Anticholinergic agents                                                 | T | 378957 | 240   | 378861 | 1.4   | 0.339689 | 0.285448 | 0.803    | 2.46     | 0.234039 | 0.639976 |
| Gynaecology and Obstetrics | Endometrial ablation (self-reported)                                   | T | 378957 | 1925  | 377176 | 1.14  | 0.130822 | 0.109829 | 0.919    | 1.41     | 0.233595 | 0.639976 |
| Operations and Procedures  | Other operations on spine                                              | T | 378957 | 4622  | 374479 | 0.91  | -0.09387 | 0.078881 | 0.78     | 1.06     | 0.234019 | 0.639976 |
| Metabolic                  | Hyperthyroidism/thyrotoxicosis (HES and self-reported)                 | T | 378957 | 4020  | 375081 | 0.904 | -0.10117 | 0.084885 | 0.765    | 1.07     | 0.233336 | 0.639976 |
| Genitourinary              | Nephritis (HES and self-reported)                                      | T | 378957 | 1824  | 377277 | 1.14  | 0.134426 | 0.112783 | 0.917    | 1.43     | 0.233301 | 0.639976 |
| Medication                 | Other sex hormones and modulators of the genital system                | T | 378957 | 368   | 378733 | 1.32  | 0.27996  | 0.236129 | 0.833    | 2.1      | 0.235771 | 0.641052 |
| Operations and Procedures  | Other operations on kidney                                             | T | 378957 | 281   | 378820 | 1.37  | 0.315466 | 0.265556 | 0.814    | 2.31     | 0.235031 | 0.641052 |
| Operations and Procedures  | Diagnostic endoscopic examination of peritoneum                        | T | 378957 | 4723  | 374378 | 0.911 | -0.09366 | 0.078972 | 0.78     | 1.06     | 0.235615 | 0.641052 |
| Gynaecology and Obstetrics | Polycystic ovaries/polycystic ovarian syndrome (HES and self-reported) | T | 378957 | 580   | 378521 | 0.752 | -0.28496 | 0.240245 | 0.457    | 1.2      | 0.23558  | 0.641052 |
| Gynaecology and Obstetrics | Cervical problem (HES and self-reported)                               | T | 378957 | 6385  | 372716 | 1.08  | 0.074536 | 0.062768 | 0.953    | 1.22     | 0.235041 | 0.641052 |
| ENT                        | Otalgia and effusion of ear (HES)                                      | T | 378957 | 479   | 378622 | 1.28  | 0.24817  | 0.209696 | 0.85     | 1.93     | 0.236623 | 0.642644 |
| Respiratory                | Unspecified chronic bronchitis (HES)                                   | T | 378957 | 243   | 378858 | 1.4   | 0.336797 | 0.285409 | 0.8      | 2.45     | 0.23798  | 0.644954 |
| Musculoskeletal            | Bone disorder (HES and self-reported)                                  | T | 378957 | 5041  | 374060 | 1.09  | 0.082728 | 0.070109 | 0.947    | 1.25     | 0.238009 | 0.644954 |
| Operations and Procedures  | Diagnostic imaging of genitourinary system                             | T | 378957 | 293   | 378808 | 1.37  | 0.31264  | 0.265387 | 0.813    | 2.3      | 0.238775 | 0.646302 |
| Musculoskeletal            | Fracture neck cervical fracture (HES and self-reported)                | T | 378957 | 345   | 378756 | 1.33  | 0.285278 | 0.242374 | 0.827    | 2.14     | 0.23919  | 0.646699 |
| Cardiovascular             | Multiple valve diseases (HES)                                          | T | 378957 | 1492  | 377609 | 1.16  | 0.145317 | 0.123787 | 0.907    | 1.47     | 0.240426 | 0.648909 |
| Medication                 | Other diagnostic agents                                                | T | 378957 | 392   | 378709 | 0.699 | -0.35876 | 0.306035 | 0.383    | 1.27     | 0.241085 | 0.648909 |
| Operations and Procedures  | Intramuscular injection                                                | T | 378957 | 1308  | 377793 | 0.835 | -0.18012 | 0.15364  | 0.618    | 1.13     | 0.24106  | 0.648909 |
| Musculoskeletal            | Fracture sternum (HES and self-reported)                               | T | 378957 | 240   | 378861 | 0.616 | -0.48508 | 0.413594 | 0.274    | 1.38     | 0.240864 | 0.648909 |
| Respiratory                | FEV1 FVC ratio                                                         | T | 286064 | NA    | NA     | NA    | 0.011224 | 0.009591 | -0.00757 | 0.030021 | 0.241888 | 0.650344 |
| Musculoskeletal            | Other joint disorder (HES and self-reported)                           | T | 378957 | 9807  | 369294 | 0.939 | -0.06315 | 0.054037 | 0.844    | 1.04     | 0.242533 | 0.651351 |
| Summary                    | Other congenital malformations of the digestive system (HES)           | T | 378957 | 632   | 378469 | 1.24  | 0.215383 | 0.184472 | 0.864    | 1.78     | 0.242983 | 0.651833 |
| Medication                 | Vitamin a and d incl combinations of the two                           | T | 378957 | 10919 | 368182 | 1.06  | 0.057015 | 0.048972 | 0.962    | 1.17     | 0.244328 | 0.653374 |
| Musculoskeletal            | Paget s disease of bone (HES)                                          | T | 378957 | 243   | 378858 | 0.618 | -0.48153 | 0.413515 | 0.275    | 1.39     | 0.244227 | 0.653374 |
| Eye                        | Corneal resistance factor right                                        | T | 81141  | NA    | NA     | NA    | -0.02064 | 0.017731 | -0.05539 | 0.014112 | 0.244371 | 0.653374 |
| Other                      | Sleep duration                                                         | T | 376654 | NA    | NA     | NA    | -0.00968 | 0.008334 | -0.02602 | 0.006651 | 0.245251 | 0.655    |
| Gynaecology and Obstetrics | Antepartum haemorrhage (HES)                                           | T | 378957 | 588   | 378513 | 1.25  | 0.219592 | 0.189747 | 0.859    | 1.81     | 0.247156 | 0.658627 |
| Operations and Procedures  | Other operations on anterior chamber of eye                            | T | 378957 | 405   | 378696 | 0.712 | -0.33954 | 0.29330  |          |          |          |          |



|                            |                                                                     |   |        |        |        |       |          |          |          |          |          |          |
|----------------------------|---------------------------------------------------------------------|---|--------|--------|--------|-------|----------|----------|----------|----------|----------|----------|
| Cardiovascular             | Heart failure (HES)                                                 | T | 378957 | 4854   | 374247 | 0.917 | -0.08626 | 0.077071 | 0.789    | 1.07     | 0.263035 | 0.677702 |
| Operations and Procedures  | Other operations on trabecular meshwork of eye                      | T | 378957 | 236    | 378865 | 0.629 | -0.46331 | 0.413747 | 0.28     | 1.42     | 0.262802 | 0.677702 |
| Summary                    | Other congenital malformations (HES)                                | T | 378957 | 615    | 378486 | 1.23  | 0.209381 | 0.187468 | 0.854    | 1.78     | 0.264044 | 0.67819  |
| Cardiovascular             | Varicose veins of lower extremities (HES)                           | T | 378957 | 9985   | 369116 | 1.06  | 0.056751 | 0.050874 | 0.958    | 1.17     | 0.264632 | 0.67819  |
| Gynaecology and Obstetrics | Myomectomy fibroids removed (self-reported)                         | T | 378957 | 2071   | 377030 | 1.13  | 0.119245 | 0.106761 | 0.914    | 1.39     | 0.264021 | 0.67819  |
| Operations and Procedures  | Operations on omentum                                               | T | 378957 | 1948   | 377153 | 0.871 | -0.13844 | 0.123969 | 0.683    | 1.11     | 0.264212 | 0.67819  |
| Operations and Procedures  | Other primary fusion of other joint                                 | T | 378957 | 1462   | 377639 | 0.851 | -0.16093 | 0.144215 | 0.642    | 1.13     | 0.264456 | 0.67819  |
| Medication                 | Opioids                                                             | T | 378957 | 102262 | 276839 | 1.02  | 0.020977 | 0.108818 | 0.984    | 1.06     | 0.264972 | 0.67834  |
| Eye                        | Diabetic eye disease (HES and self-reported)                        | T | 378957 | 1737   | 377364 | 0.865 | -0.14555 | 0.130747 | 0.669    | 1.12     | 0.265613 | 0.679259 |
| Respiratory                | Pneumothorax (HES)                                                  | T | 378957 | 762    | 378339 | 1.21  | 0.189347 | 0.171084 | 0.864    | 1.69     | 0.268402 | 0.682816 |
| Gynaecology and Obstetrics | Spontaneous abortion (HES)                                          | T | 378957 | 1258   | 377843 | 0.841 | -0.17352 | 0.157102 | 0.618    | 1.14     | 0.26937  | 0.682816 |
| Operations and Procedures  | Muscle soft tissue surgery (self-reported)                          | T | 378957 | 10926  | 368175 | 1.06  | 0.053969 | 0.048743 | 0.959    | 1.16     | 0.268201 | 0.682816 |
| Operations and Procedures  | Arteriovenous shunt                                                 | T | 378957 | 297    | 378804 | 0.673 | -0.39598 | 0.358608 | 0.333    | 1.36     | 0.269504 | 0.682816 |
| Cardiovascular             | Heart valve problemheart murmur (HES and self-reported)             | T | 378957 | 7532   | 371569 | 0.934 | -0.0678  | 0.061321 | 0.829    | 1.05     | 0.268894 | 0.682816 |
| Cardiovascular             | Arterial embolism (HES and self-reported)                           | T | 378957 | 762    | 378339 | 0.795 | -0.22943 | 0.207801 | 0.529    | 1.19     | 0.269555 | 0.682816 |
| Eye                        | Optic neuritis (HES and self-reported)                              | T | 378957 | 206    | 378895 | 0.606 | -0.50142 | 0.452872 | 0.249    | 1.47     | 0.268212 | 0.682816 |
| Musculoskeletal            | Fracture face orbit eye socket (HES and self-reported)              | T | 378957 | 477    | 378624 | 0.741 | -0.29994 | 0.271516 | 0.435    | 1.26     | 0.269291 | 0.682816 |
| Other                      | Getting up in morning                                               | T | 377919 | NA     | NA     | NA    | -0.00921 | 0.008331 | -0.02554 | 0.007116 | 0.268977 | 0.682816 |
| Operations and Procedures  | Other operations on blood vessel                                    | T | 378957 | 317    | 378784 | 0.689 | -0.37211 | 0.338425 | 0.355    | 1.34     | 0.27154  | 0.687122 |
| Summary                    | Urolithiasis (HES)                                                  | T | 378957 | 5984   | 373117 | 0.927 | -0.07621 | 0.069365 | 0.809    | 1.06     | 0.271907 | 0.687328 |
| Operations and Procedures  | Autonomic cardiovascular testing                                    | T | 378957 | 235    | 378866 | 0.636 | -0.4531  | 0.413683 | 0.283    | 1.43     | 0.273391 | 0.690355 |
| Gynaecology and Obstetrics | Mammoplasty cosmetic operation on breast (self-reported)            | T | 378957 | 2699   | 376402 | 0.892 | -0.11389 | 0.104085 | 0.728    | 1.09     | 0.273884 | 0.690876 |
| Operations and Procedures  | Extirpation of lesion of conjunctiva                                | T | 378957 | 351    | 378750 | 0.704 | -0.35045 | 0.321034 | 0.375    | 1.32     | 0.275004 | 0.692498 |
| Operations and Procedures  | Destruction of lesion of cervix uteri                               | T | 378957 | 2136   | 376965 | 0.879 | -0.12902 | 0.118212 | 0.697    | 1.11     | 0.275102 | 0.692498 |
| Summary                    | Coagulation defects purpura and other haemorrhagic conditions (HES) | T | 378957 | 2426   | 376675 | 1.11  | 0.108133 | 0.09929  | 0.917    | 1.35     | 0.276126 | 0.69435  |
| Cancer                     | Non melanoma skin cancer (self-reported)                            | T | 378957 | 550    | 378551 | 0.765 | -0.26755 | 0.246623 | 0.472    | 1.24     | 0.277981 | 0.695385 |
| Operations and Procedures  | Bone surgery joint surgery (self-reported)                          | T | 378957 | 3136   | 375965 | 0.901 | -0.10438 | 0.096206 | 0.746    | 1.09     | 0.277935 | 0.695385 |
| Summary                    | Mal neo of digestive organs (cancer register)                       | T | 378957 | 5957   | 373144 | 1.07  | 0.070511 | 0.064848 | 0.945    | 1.22     | 0.276893 | 0.695385 |
| Genitourinary              | Kidney nephropathy (HES and self-reported)                          | T | 378957 | 417    | 378684 | 1.28  | 0.243551 | 0.224219 | 0.822    | 1.98     | 0.277381 | 0.695385 |
| Gynaecology and Obstetrics | Dysmenorrhoea dysmenorrhoea (HES and self-reported)                 | T | 378957 | 1606   | 377495 | 0.862 | -0.14866 | 0.13691  | 0.659    | 1.13     | 0.277547 | 0.695385 |
| Genitourinary              | Inflammatory disease of uterus except cervix (HES)                  | T | 378957 | 260    | 378841 | 0.66  | -0.4153  | 0.383443 | 0.311    | 1.4      | 0.27877  | 0.696636 |
| Operations and Procedures  | Sampling of lymph nodes                                             | T | 378957 | 2952   | 376149 | 0.898 | -0.1072  | 0.099153 | 0.74     | 1.09     | 0.279609 | 0.698008 |
| Operations and Procedures  | Other cardiac pacemaker system                                      | T | 378957 | 1141   | 377960 | 0.839 | -0.17601 | 0.163389 | 0.609    | 1.16     | 0.28136  | 0.701652 |
| Operations and Procedures  | Removal of products of delivered uterus                             | T | 378957 | 339    | 378762 | 0.707 | -0.34687 | 0.322269 | 0.376    | 1.33     | 0.281772 | 0.701713 |
| Immuno-inflammation        | Eczemadermatitis (HES and self-reported)                            | T | 378957 | 11296  | 367805 | 1.05  | 0.051437 | 0.047807 | 0.959    | 1.16     | 0.281967 | 0.701713 |
| Summary                    | Intestinal infectious diseases (HES)                                | T | 378957 | 8022   | 371079 | 1.06  | 0.060429 | 0.056433 | 0.951    | 1.19     | 0.284251 | 0.70321  |
| Mental health              | Specific personality disorders (HES)                                | T | 378957 | 293    | 378808 | 0.681 | -0.38453 | 0.358693 | 0.337    | 1.38     | 0.283702 | 0.70321  |
| Symptoms                   | Somnolence stupor and coma (HES)                                    | T | 378957 | 636    | 378465 | 0.784 | -0.24351 | 0.227436 | 0.502    | 1.22     | 0.28432  | 0.70321  |
| Symptoms                   | Enlarged lymph nodes (HES)                                          | T | 378957 | 2200   | 376901 | 1.12  | 0.11622  | 0.104247 | 0.911    | 1.37     | 0.284285 | 0.70321  |
| Operations and Procedures  | Other caesarian delivery                                            | T | 378957 | 1946   | 377155 | 0.875 | -0.13354 | 0.124379 | 0.686    | 1.12     | 0.282982 | 0.70321  |
| Digestive system           | Inguinal hernia (HES and self-reported)                             | T | 378957 | 15351  | 363750 | 1.05  | 0.045485 | 0.042467 | 0.963    | 1.14     | 0.28413  | 0.70321  |
| Mental health              | Happiness                                                           | T | 125989 | NA     | NA     | NA    | 0.015309 | 0.014312 | -0.01274 | 0.043361 | 0.284783 | 0.703633 |
| Respiratory                | Pneumonia due to Streptococcus pneumoniae (HES)                     | T | 378957 | 234    | 378867 | 0.643 | -0.44216 | 0.413736 | 0.286    | 1.45     | 0.285199 | 0.703939 |
| Cardiovascular             | Complications and ill defined descriptions of heart disease (HES)   | T | 378957 | 3773   | 375328 | 0.911 | -0.09327 | 0.087427 | 0.767    | 1.08     | 0.286069 | 0.705135 |
| Respiratory                | Asthma (HES)                                                        | T | 378957 | 23838  | 355263 | 0.964 | -0.03705 | 0.034744 | 0.9      | 1.03     | 0.286269 | 0.705135 |
| Operations and Procedures  | Operations on nipple                                                | T | 378957 | 610    | 378491 | 0.78  | -0.24818 | 0.233391 | 0.494    | 1.23     | 0.287615 | 0.707727 |
| Operations and Procedures  | Ultrasound scan (self-reported)                                     | T | 378957 | 230    | 378871 | 0.644 | -0.43963 | 0.413833 | 0.286    | 1.45     | 0.288088 | 0.708167 |
| Operations and Procedures  | Other operations on anterior abdominal wall                         | T | 378957 | 600    | 378501 | 1.22  | 0.202115 | 0.190611 | 0.842    | 1.78     | 0.288893 | 0.708199 |
| Operations and Procedures  | Revisional decompression operations on lumbar spine                 | T | 378957 | 287    | 378814 | 0.684 | -0.38046 | 0.358804 | 0.338    | 1.38     | 0.288979 | 0.708199 |
| Operations and Procedures  | Other open operations on intra articular structure                  | T | 378957 | 1473   | 377628 | 0.859 | -0.15149 | 0.142818 | 0.65     | 1.14     | 0.288812 | 0.708199 |
| Medication                 | Omeprazole e.g Zanol                                                | T | 374624 | 22414  | 352354 | 0.963 | -0.03809 | 0.036039 | 0.897    | 1.03     | 0.290565 | 0.711353 |
| Respiratory                | Pneumonitis due to solids and liquids (HES)                         | T | 378957 | 560    | 378541 | 1.23  | 0.208124 | 0.197626 | 0.836    | 1.81     | 0.292286 | 0.71484  |
| Operations and Procedures  | Other puncture of liver                                             | T | 378957 | 403    | 378698 | 1.27  | 0.241532 | 0.22961  | 0.812    | 2        | 0.292834 | 0.715165 |
| Cardiovascular             | Subarachnoid haemorrhage (HES and self-reported)                    | T | 378957 | 936    | 378165 | 1.18  | 0.164491 | 0.156429 | 0.868    | 1.6      | 0.293013 | 0.715165 |
| Operations and Procedures  | Excision of organ NOC                                               | T | 378957 | 1832   | 377269 | 1.13  | 0.119041 | 0.113355 | 0.902    | 1.41     | 0.293641 | 0.715383 |
| Respiratory                | Chronic obstructive airways disease (HES and self-reported)         | T | 378957 | 8796   | 370305 | 1.06  | 0.057312 | 0.054581 | 0.952    | 1.18     | 0.293666 | 0.715383 |
| Summary                    | Acute upper respiratory infections (HES)                            | T | 378957 | 2654   | 376447 | 0.895 | -0.1105  | 0.105387 | 0.728    | 1.1      | 0.2944   | 0.71565  |
| Operations and Procedures  | Other operations on tonsil                                          | T | 378957 | 503    | 378598 | 0.76  | -0.27506 | 0.26231  | 0.454    | 1.27     | 0.294357 | 0.71565  |
| Genitourinary              | Pyelonephritis (HES and self-reported)                              | T | 378957 | 1141   | 377960 | 1.16  | 0.14879  | 0.142288 | 0.878    | 1.53     | 0.295675 | 0.718025 |
| Musculoskeletal            | Scoliosis (HES and self-reported)                                   | T | 378957 | 1135   | 377966 | 0.843 | -0.1706  | 0.163306 | 0.612    | 1.16     | 0.296169 | 0.718501 |
| Respiratory                | Pleural plaques not known asbestosis (HES and self-reported)        | T | 378957 | 690    | 378411 | 1.21  | 0.187007 | 0.179189 | 0.849    | 1.71     | 0.296658 | 0.718963 |
| Operations and Procedures  | Dilation of organ NOC                                               | T | 378957 | 512    | 378589 | 0.767 | -0.26495 | 0.254186 | 0.466    | 1.26     | 0.297257 | 0.719691 |
| Summary                    | Other soft tissue disorders (HES)                                   | T | 378957 | 25100  | 354001 | 1.04  | 0.034416 | 0.033057 | 0.97     | 1.1      | 0.297834 | 0.720364 |
| Operations and Procedures  | Other leg region                                                    | T | 378957 | 287    | 378814 | 0.689 | -0.37313 | 0.358797 | 0.341    | 1.39     | 0.298363 | 0.720919 |
| Operations and Procedures  | Operations on urethral orifice                                      | T | 378957 | 464    | 378637 | 0.754 | -0.28223 | 0.271674 | 0.443    | 1.28     | 0.298873 | 0.721428 |
| Respiratory                | Pleural effusion (HES)                                              | T | 378957 | 4725   | 374376 | 1.08  | 0.075045 | 0.072419 | 0.935    | 1.24     | 0.300079 | 0.723614 |
| Summary                    | Schizophrenia schizotypal and delusional disorders (HES)            | T | 378957 | 899    | 378202 | 0.823 | -0.19514 | 0.189029 | 0.568    | 1.19     | 0.301919 | 0.723782 |
| Infectious disease         | Bacterial agents as the cause of diseases (HES)                     | T | 378957 | 7935   | 371166 | 1.06  | 0.058725 | 0.056899 | 0.949    | 1.19     | 0.302028 | 0.723782 |
| Neurosciences              | Epilepsy (HES)                                                      | T | 378957 | 3387   | 375714 | 1.09  | 0.08803  | 0.085332 | 0.924    | 1.29     | 0.302252 | 0.723782 |
| Operations and Procedures  | Knee surgery not replacement (self-reported)                        | T | 378957 | 12555  | 366546 | 0.952 | -0.04944 | 0.04776  | 0.867    | 1.05     | 0.300549 | 0.723782 |
| ENT                        | Rhinoplasty nose surgery (self-reported)                            | T | 378957 | 2193   | 376908 | 0.887 | -0.11947 | 0.115692 | 0.707    | 1.11     | 0.301748 | 0.723782 |
| Operations and Procedures  | Other excision of right hemicolon                                   | T | 378957 | 1421   | 377680 | 0.86  | -0.1504  | 0.145728 | 0.647    | 1.14     | 0.302037 | 0.723782 |
| Operations and Procedures  | Attention to skin expander in subcutaneous tissue                   | T | 378957 | 431    | 378670 | 0.748 | -0.29089 | 0.281953 | 0.43     | 1.3      | 0.302192 | 0.723782 |
| Respiratory                | Pyothorax (HES)                                                     | T | 378957 | 288    | 378813 | 1.31  | 0.273698 | 0.26551  | 0.781    | 2.21     | 0.302616 | 0.723934 |
| ENT                        | Thyroiditis (HES and self-reported)                                 | T | 378957 | 442    | 378659 | 1.25  | 0.225591 | 0.219035 | 0.816    | 1.92     | 0.303043 | 0.724237 |
| Infectious disease         | Herpesviral (HES)                                                   | T | 378957 | 232    | 378869 | 0.654 | -0.42414 | 0.413783 | 0.291    | 1.47     | 0.305352 | 0.729032 |
| Operations and Procedures  | Excision of lung                                                    | T | 378957 | 810    | 378291 | 1.19  | 0.170411 | 0.166528 | 0.856    | 1.64     | 0.30616  | 0.729644 |
| Operations and Procedures  | Other operations on delivered uterus                                | T | 378957 | 225    | 378876 | 1.36  | 0.305004 | 0.298175 | 0.756    | 2.43     | 0.306354 | 0.729644 |
| Operations and Procedures  | Therapeutic endoscopic operations on cavity of knee joint           | T | 378957 | 4112   | 374989 | 0.919 | -0.085   | 0.083122 | 0.78     | 1.08     | 0.306517 | 0.729644 |
| Medication                 | Antipsychotics                                                      | T | 378957 | 2920   | 376181 | 0.903 | -0.10181 | 0.099767 | 0.743    | 1.1      | 0.30748  | 0.730951 |
| Operations and Procedures  | Extirpation of lesion of vagina                                     | T | 378957 | 675    | 378426 | 0.801 | -0.22149 | 0.217123 | 0.524    | 1.23     | 0.307673 | 0.730951 |
| Eye                        | Eye surgery (self-reported)                                         | T | 378957 | 3495   | 375606 | 0.912 | -0.09246 | 0.090817 | 0.763    | 1.09     | 0.308657 | 0.732495 |
| Operations and Procedures  | Removal of repair material from skin                                | T | 378957 | 460    | 378641 | 0.759 | -0.27616 | 0.271585 | 0.446    | 1.29     | 0.309235 | 0.732495 |
| Medication                 | Folic acid or Folate Vit B9                                         | T | 376892 | 8174   | 368862 | 0.942 | -0.05997 | 0.058953 | 0.839    | 1.06     | 0.309036 | 0.732495 |
| Operations and Procedures  | Other operations on eyelid                                          | T | 378957 | 931    | 378170 | 0.831 | -0.18565 | 0.182953 | 0.58     | 1.19     | 0.310227 | 0.734123 |
| Digestive system           | Gastroenteritis/dysentery (HES and self-reported)                   | T | 378957 | 8121   | 370980 | 1.06  | 0.056788 | 0.056183 | 0.948    | 1.18     | 0.312123 | 0.737885 |
| Digestive system           | Fissure and fistula of anal and rectal regions (HES)                | T | 378957 | 2863   | 376238 | 1.1   | 0.093474 | 0.092612 | 0.916    | 1.32     | 0.312828 | 0.738559 |
| Operations and Procedures  | Therapeutic spinal puncture                                         | T | 378957 | 253    | 378848 | 1.33  | 0.287431 | 0.285    | 0.762    | 2.3      |          |          |

|                            |                                                                  |   |        |        |        |       |          |          |          |          |          |          |
|----------------------------|------------------------------------------------------------------|---|--------|--------|--------|-------|----------|----------|----------|----------|----------|----------|
| Summary                    | Disorders of vitreous body and globe (HES)                       | T | 378957 | 1565   | 377536 | 1.13  | 0.117966 | 0.121105 | 0.887    | 1.43     | 0.330018 | 0.755305 |
| Operations and Procedures  | Ct scan (self-reported)                                          | T | 378957 | 307    | 378794 | 0.719 | -0.32977 | 0.338535 | 0.37     | 1.4      | 0.33     | 0.755305 |
| Gynaecology and Obstetrics | Miscarriage (HES and self-reported)                              | T | 378957 | 1976   | 377125 | 0.888 | -0.11878 | 0.121978 | 0.699    | 1.13     | 0.330152 | 0.755305 |
| Summary                    | Infectious arthropathies (HES)                                   | T | 378957 | 428    | 378673 | 1.24  | 0.217938 | 0.224061 | 0.802    | 1.93     | 0.330715 | 0.755875 |
| Summary                    | General symptoms and signs (HES)                                 | T | 378957 | 41556  | 337545 | 0.974 | -0.02617 | 0.02694  | 0.924    | 1.03     | 0.331371 | 0.756657 |
| Digestive system           | Other diseases of jaws (HES)                                     | T | 378957 | 301    | 378800 | 1.29  | 0.257174 | 0.265152 | 0.769    | 2.17     | 0.332029 | 0.757551 |
| Operations and Procedures  | Abdominal pelvic adhesion surgery (self-reported)                | T | 378957 | 1192   | 377909 | 1.14  | 0.135277 | 0.139631 | 0.871    | 1.51     | 0.332633 | 0.757551 |
| Musculoskeletal            | Myositisomyopathy (HES and self-reported)                        | T | 378957 | 338    | 378763 | 0.733 | -0.31115 | 0.321207 | 0.39     | 1.37     | 0.332706 | 0.757551 |
| Operations and Procedures  | Inguinal femoral hernia repair (self-reported)                   | T | 378957 | 12611  | 366490 | 1.05  | 0.044741 | 0.046243 | 0.955    | 1.14     | 0.333285 | 0.758153 |
| Gynaecology and Obstetrics | Breast cyst abscess removal (self-reported)                      | T | 378957 | 3620   | 375481 | 1.08  | 0.080134 | 0.082931 | 0.921    | 1.27     | 0.333904 | 0.758844 |
| ENT                        | Other diseases of inner ear (HES)                                | T | 378957 | 734    | 378367 | 0.818 | -0.20063 | 0.207779 | 0.545    | 1.23     | 0.334245 | 0.758903 |
| Operations and Procedures  | Primary repair of tendon                                         | T | 378957 | 2574   | 376527 | 0.902 | -0.10286 | 0.106612 | 0.732    | 1.11     | 0.334654 | 0.759116 |
| Operations and Procedures  | Fusion of joint of toe                                           | T | 378957 | 3193   | 375908 | 0.913 | -0.09138 | 0.094784 | 0.758    | 1.1      | 0.334986 | 0.759155 |
| ENT                        | Labyrinthitis (HES and self-reported)                            | T | 378957 | 839    | 378262 | 0.831 | -0.18517 | 0.192463 | 0.57     | 1.21     | 0.335599 | 0.760714 |
| Medication                 | Other systemic drugs for obstructive airway diseases             | T | 378957 | 21417  | 357684 | 1.03  | 0.0342   | 0.035574 | 0.965    | 1.11     | 0.33636  | 0.760837 |
| Operations and Procedures  | Other diagnostic tests                                           | T | 378957 | 994    | 378107 | 0.845 | -0.16792 | 0.174826 | 0.6      | 1.19     | 0.336819 | 0.761116 |
| Operations and Procedures  | Excision of ganglion                                             | T | 378957 | 2429   | 376672 | 1.1   | 0.095975 | 0.100186 | 0.904    | 1.34     | 0.33808  | 0.762579 |
| Musculoskeletal            | Osteomyelitis (HES and self-reported)                            | T | 378957 | 1062   | 378039 | 0.85  | -0.16279 | 0.169851 | 0.609    | 1.19     | 0.337844 | 0.762579 |
| Genitourinary              | Other noninflammatory disorders of vagina (HES)                  | T | 378957 | 1392   | 377709 | 0.87  | -0.13947 | 0.145937 | 0.653    | 1.16     | 0.339229 | 0.763628 |
| Operations and Procedures  | Exploration of vagina                                            | T | 378957 | 1868   | 377233 | 0.887 | -0.11946 | 0.125067 | 0.694    | 1.13     | 0.339496 | 0.763628 |
| Neurosciences              | Multiple sclerosis (HES and self-reported)                       | T | 378957 | 1635   | 377466 | 1.12  | 0.114791 | 0.120128 | 0.886    | 1.42     | 0.339287 | 0.763628 |
| Musculoskeletal            | Acquired deformities of musculoskeletal (HES)                    | T | 378957 | 329    | 378772 | 1.28  | 0.244685 | 0.256602 | 0.772    | 2.11     | 0.340306 | 0.763947 |
| Operations and Procedures  | Fixation of mandible                                             | T | 378957 | 258    | 378843 | 0.694 | -0.36571 | 0.383372 | 0.327    | 1.47     | 0.340118 | 0.763947 |
| Neurosciences              | Paraplegia (HES and self-reported)                               | T | 378957 | 312    | 378789 | 0.724 | -0.32254 | 0.338448 | 0.373    | 1.41     | 0.340589 | 0.763947 |
| Operations and Procedures  | Excision of haemorrhoid                                          | T | 378957 | 2721   | 376380 | 1.09  | 0.09036  | 0.094932 | 0.909    | 1.32     | 0.341175 | 0.764549 |
| Digestive system           | Diseases of tongue (HES)                                         | T | 378957 | 1106   | 377995 | 1.15  | 0.137649 | 0.145035 | 0.864    | 1.52     | 0.342582 | 0.766277 |
| Gynaecology and Obstetrics | Cervical polyps (HES and self-reported)                          | T | 378957 | 3066   | 376035 | 1.09  | 0.08488  | 0.089424 | 0.914    | 1.3      | 0.342525 | 0.766277 |
| Medication                 | Low ceiling diuretics thiazides                                  | T | 378957 | 23557  | 355544 | 0.967 | -0.03333 | 0.035192 | 0.903    | 1.04     | 0.343648 | 0.766684 |
| Medication                 | Anti acne preparations for topical use                           | T | 378957 | 1608   | 377493 | 0.879 | -0.12898 | 0.136324 | 0.673    | 1.15     | 0.344073 | 0.766684 |
| Operations and Procedures  | Lung removal pneumonectomy lobectomy (self-reported)             | T | 378957 | 614    | 378487 | 1.2   | 0.180299 | 0.190575 | 0.824    | 1.74     | 0.344107 | 0.766684 |
| Operations and Procedures  | Biopsy (self-reported)                                           | T | 378957 | 275    | 378826 | 0.712 | -0.3397  | 0.358997 | 0.352    | 1.44     | 0.344016 | 0.766684 |
| Musculoskeletal            | Arthritis of first carpometacarpal joint (HES)                   | T | 378957 | 1179   | 377922 | 0.86  | -0.15063 | 0.159338 | 0.629    | 1.18     | 0.344481 | 0.766964 |
| Cardiovascular             | Other acute ischaemic heart diseases (HES)                       | T | 378957 | 1278   | 377823 | 1.14  | 0.128358 | 0.136022 | 0.871    | 1.48     | 0.345339 | 0.768164 |
| Operations and Procedures  | Reconstruction of nipple and areola                              | T | 378957 | 637    | 378464 | 0.811 | -0.20937 | 0.222271 | 0.525    | 1.25     | 0.346217 | 0.769407 |
| Medication                 | Drugs for constipation                                           | T | 378957 | 6110   | 372991 | 0.938 | -0.06351 | 0.06804  | 0.821    | 1.07     | 0.350581 | 0.770323 |
| Mental health              | Reaction to severe stress and adjustment disorders (HES)         | T | 378957 | 481    | 378620 | 0.783 | -0.24407 | 0.26256  | 0.468    | 1.31     | 0.352597 | 0.770323 |
| Respiratory                | Chronic diseases of tonsils and adenoids (HES)                   | T | 378957 | 904    | 378197 | 0.84  | -0.17411 | 0.185996 | 0.584    | 1.21     | 0.349237 | 0.770323 |
| Digestive system           | Vascular disorders of intestine (HES)                            | T | 378957 | 936    | 378165 | 0.845 | -0.16837 | 0.180188 | 0.594    | 1.2      | 0.350089 | 0.770323 |
| Digestive system           | Other inflammatory liver diseases (HES)                          | T | 378957 | 623    | 378478 | 0.809 | -0.21181 | 0.227508 | 0.518    | 1.26     | 0.351847 | 0.770323 |
| Immuno-inflammation        | Other epidermal thickening (HES)                                 | T | 378957 | 608    | 378493 | 1.19  | 0.177149 | 0.190582 | 0.822    | 1.73     | 0.352623 | 0.770323 |
| Musculoskeletal            | Shoulder lesions (HES)                                           | T | 378957 | 836    | 370765 | 1.05  | 0.051621 | 0.05538  | 0.945    | 1.17     | 0.351273 | 0.770323 |
| Gynaecology and Obstetrics | False labour (HES)                                               | T | 378957 | 973    | 378128 | 1.15  | 0.143961 | 0.154015 | 0.854    | 1.56     | 0.349933 | 0.770323 |
| Cancer                     | Basal cell carcinoma (self-reported)                             | T | 378957 | 3552   | 375549 | 1.08  | 0.077179 | 0.082933 | 0.918    | 1.27     | 0.352048 | 0.770323 |
| Family history             | Stroke (family history - mother)                                 | T | 378957 | 49690  | 307839 | 0.977 | -0.02337 | 0.025064 | 0.93     | 1.03     | 0.351118 | 0.770323 |
| Other                      | Wheeze or whistling in the chest in last year                    | T | 378957 | 77179  | 294800 | 0.981 | -0.01961 | 0.020922 | 0.941    | 1.02     | 0.348591 | 0.770323 |
| Operations and Procedures  | Other adjustment to muscle of eye                                | T | 378957 | 211    | 378890 | 1.34  | 0.289903 | 0.309934 | 0.728    | 2.45     | 0.349598 | 0.770323 |
| Operations and Procedures  | Total excision of bladder                                        | T | 378957 | 315    | 378786 | 1.27  | 0.241167 | 0.256971 | 0.769    | 2.11     | 0.347988 | 0.770323 |
| Operations and Procedures  | Introduction of substance into skin                              | T | 378957 | 217    | 378884 | 0.679 | -0.38665 | 0.41416  | 0.302    | 1.53     | 0.350523 | 0.770323 |
| Operations and Procedures  | Excision of muscle                                               | T | 378957 | 476    | 378625 | 0.783 | -0.24419 | 0.262544 | 0.468    | 1.31     | 0.352325 | 0.770323 |
| Medication                 | Multivitamins minerals                                           | T | 378957 | 81736  | 295300 | 0.981 | -0.01895 | 0.020391 | 0.943    | 1.02     | 0.352705 | 0.770323 |
| ENT                        | Chronic laryngitis (HES and self-reported)                       | T | 378957 | 1014   | 378087 | 0.85  | -0.16283 | 0.174758 | 0.603    | 1.2      | 0.351485 | 0.770323 |
| Anthropometry              | Total tissue fat percentage                                      | T | 4100   | NA     | NA     | NA    | 0.080301 | 0.086035 | -0.08833 | 0.248929 | 0.350639 | 0.770323 |
| Biological assays          | Haemoglobin concentration                                        | T | 367722 | NA     | NA     | NA    | 0.007927 | 0.008438 | -0.00861 | 0.024465 | 0.374518 | 0.770323 |
| Cardiovascular             | Congenital malformations of cardiac septa (HES)                  | T | 378957 | 521    | 378580 | 1.21  | 0.190591 | 0.205245 | 0.809    | 1.81     | 0.353094 | 0.770474 |
| Haematology                | Other disorders of white blood cells (HES)                       | T | 378957 | 309    | 378792 | 0.731 | -0.31361 | 0.338494 | 0.376    | 1.42     | 0.354198 | 0.770789 |
| Musculoskeletal            | Enthesopathies of lower limb excluding foot (HES)                | T | 378957 | 393    | 378708 | 0.762 | -0.27198 | 0.293381 | 0.429    | 1.35     | 0.353893 | 0.770789 |
| Operations and Procedures  | Stomach surgery (self-reported)                                  | T | 378957 | 2197   | 376904 | 0.898 | -0.10794 | 0.116392 | 0.715    | 1.13     | 0.353738 | 0.770789 |
| Digestive system           | Sclerosing cholangitis (HES and self-reported)                   | T | 378957 | 454    | 378647 | 1.22  | 0.202254 | 0.218872 | 0.797    | 1.88     | 0.355447 | 0.772112 |
| ENT                        | Tonsillitis (HES and self-reported)                              | T | 378957 | 3534   | 375567 | 0.921 | -0.08271 | 0.089477 | 0.773    | 1.1      | 0.355303 | 0.772112 |
| Metabolic                  | Other nontoxic goitre (HES)                                      | T | 378957 | 1508   | 377593 | 0.879 | -0.12941 | 0.140227 | 0.667    | 1.16     | 0.356071 | 0.772727 |
| Mental health              | Other mental disorders due to brain damage (HES)                 | T | 378957 | 212    | 378889 | 1.33  | 0.284753 | 0.309935 | 0.724    | 2.44     | 0.358226 | 0.775147 |
| Symptoms                   | Unspecified urinary incontinence (HES)                           | T | 378957 | 2162   | 376939 | 1.1   | 0.097315 | 0.105896 | 0.896    | 1.36     | 0.358113 | 0.775147 |
| Operations and Procedures  | Other operations on palate                                       | T | 378957 | 1051   | 378050 | 0.854 | -0.15829 | 0.172229 | 0.609    | 1.2      | 0.358064 | 0.775147 |
| Musculoskeletal            | Fracture shoulder scapula (HES and self-reported)                | T | 378957 | 2722   | 376379 | 0.91  | -0.09484 | 0.103273 | 0.743    | 1.11     | 0.358453 | 0.775147 |
| Digestive system           | Inguinal hernia (HES)                                            | T | 378957 | 14392  | 364709 | 1.04  | 0.040212 | 0.043831 | 0.955    | 1.13     | 0.358908 | 0.775434 |
| Operations and Procedures  | Vaginal operations to support outlet of female bladder           | T | 378957 | 3234   | 375867 | 0.917 | -0.0863  | 0.094129 | 0.763    | 1.1      | 0.35924  | 0.775456 |
| Operations and Procedures  | Other total prosthetic replacement of knee joint                 | T | 378957 | 844    | 378257 | 0.841 | -0.17334 | 0.189325 | 0.58     | 1.22     | 0.359895 | 0.776175 |
| Cardiovascular             | Other conduction disorders (HES)                                 | T | 378957 | 1981   | 377120 | 0.896 | -0.11011 | 0.120534 | 0.707    | 1.13     | 0.360989 | 0.777838 |
| Medication                 | Low ceiling diuretics etac thiazides                             | T | 378957 | 1449   | 377652 | 1.12  | 0.114893 | 0.126452 | 0.876    | 1.44     | 0.363569 | 0.778777 |
| Neurosciences              | Transient cerebral ischaemic attacks and related syndromes (HES) | T | 378957 | 2348   | 376753 | 1.1   | 0.092282 | 0.101804 | 0.898    | 1.34     | 0.364689 | 0.778777 |
| Cardiovascular             | Other pulmonary heart diseases (HES)                             | T | 378957 | 745    | 378356 | 1.17  | 0.157586 | 0.173533 | 0.833    | 1.64     | 0.363823 | 0.778777 |
| Digestive system           | Other diseases of gallbladder (HES)                              | T | 378957 | 1619   | 377482 | 1.12  | 0.109754 | 0.120937 | 0.888    | 1.41     | 0.364125 | 0.778777 |
| Musculoskeletal            | Ankylosing spondylitis (HES)                                     | T | 378957 | 573    | 378528 | 1.2   | 0.178265 | 0.197443 | 0.812    | 1.76     | 0.366594 | 0.778777 |
| Symptoms                   | Flatulence and related conditions (HES)                          | T | 378957 | 1544   | 377557 | 0.882 | -0.12541 | 0.138834 | 0.672    | 1.16     | 0.366382 | 0.778777 |
| Cancer                     | Rodent ulcer (self-reported)                                     | T | 378957 | 540    | 378561 | 1.2   | 0.183215 | 0.201367 | 0.809    | 1.78     | 0.362898 | 0.778777 |
| Operations and Procedures  | Incision of breast                                               | T | 378957 | 615    | 378486 | 0.814 | -0.20592 | 0.227665 | 0.521    | 1.27     | 0.365728 | 0.778777 |
| Operations and Procedures  | Operations on turbinate of nose                                  | T | 378957 | 2985   | 376116 | 1.09  | 0.082769 | 0.091485 | 0.908    | 1.3      | 0.365609 | 0.778777 |
| Operations and Procedures  | Repair of vault of vagina                                        | T | 378957 | 1192   | 377949 | 1.14  | 0.129768 | 0.142568 | 0.861    | 1.51     | 0.362705 | 0.778777 |
| Operations and Procedures  | Other operations on soft tissue                                  | T | 378957 | 1277   | 377824 | 1.13  | 0.122782 | 0.135825 | 0.866    | 1.48     | 0.36601  | 0.778777 |
| Respiratory                | Bronchiectasis (HES and self-reported)                           | T | 378957 | 2109</ |        |       |          |          |          |          |          |          |

|                            |                                                               |   |        |        |        |       |          |          |          |          |          |          |
|----------------------------|---------------------------------------------------------------|---|--------|--------|--------|-------|----------|----------|----------|----------|----------|----------|
| Operations and Procedures  | Excision of sigmoid colon                                     | T | 378957 | 638    | 378463 | 0.822 | -0.19653 | 0.222149 | 0.532    | 1.27     | 0.376327 | 0.78129  |
| Operations and Procedures  | Other operations on bladder                                   | T | 378957 | 1638   | 377463 | 1.11  | 0.105353 | 0.120183 | 0.878    | 1.41     | 0.3807   | 0.78129  |
| Operations and Procedures  | Debridement and irrigation of joint                           | T | 378957 | 1526   | 377575 | 0.885 | -0.12218 | 0.138865 | 0.674    | 1.16     | 0.378924 | 0.78129  |
| Medication                 | Aspirin                                                       | T | 374624 | 52613  | 322155 | 0.978 | -0.02187 | 0.024968 | 0.932    | 1.03     | 0.381177 | 0.78129  |
| Mental health              | Schizophrenia (HES and self-reported)                         | T | 378957 | 686    | 378415 | 1.17  | 0.161122 | 0.184126 | 0.819    | 1.69     | 0.38154  | 0.78129  |
| Respiratory                | Empyema (HES and self-reported)                               | T | 378957 | 299    | 378802 | 1.26  | 0.232536 | 0.265236 | 0.75     | 2.12     | 0.380642 | 0.78129  |
| Mental health              | Postnatal depression (HES and self-reported)                  | T | 378957 | 311    | 378790 | 1.26  | 0.227559 | 0.257128 | 0.759    | 2.08     | 0.376155 | 0.78129  |
| Musculoskeletal            | Other fractures (HES and self-reported)                       | T | 378957 | 5304   | 373797 | 1.06  | 0.060394 | 0.069001 | 0.928    | 1.22     | 0.381431 | 0.78129  |
| Musculoskeletal            | L1 L4 BMD bone mineral density                                | T | 4083   | NA     | NA     | NA    | -0.0763  | 0.086238 | -0.24541 | 0.09282  | 0.376562 | 0.78129  |
| Family history             | Mother's age at death                                         | T | 222989 | NA     | NA     | NA    | 0.009536 | 0.010759 | -0.01155 | 0.030623 | 0.375435 | 0.78129  |
| Musculoskeletal            | Muscle/soft tissue problem (HES and self-reported)            | T | 378957 | 32458  | 346643 | 1.03  | 0.025706 | 0.029489 | 0.968    | 1.09     | 0.38336  | 0.783968 |
| Medication                 | Other cardiac preparations                                    | T | 378957 | 50254  | 328847 | 1.02  | 0.021302 | 0.024547 | 0.974    | 1.07     | 0.385497 | 0.787002 |
| NA                         | Intracerebral haemorrhage                                     | T | 378957 | 792    | 378309 | 0.843 | -0.17021 | 0.196112 | 0.574    | 1.24     | 0.385447 | 0.787002 |
| Digestive system           | Rectal prolapse (HES and self-reported)                       | T | 378957 | 1030   | 378071 | 1.14  | 0.129783 | 0.149702 | 0.849    | 1.53     | 0.385975 | 0.787311 |
| Gynaecology and Obstetrics | Unilateral oophorectomy (self-reported)                       | T | 378957 | 2254   | 376847 | 1.09  | 0.08998  | 0.103952 | 0.882    | 1.34     | 0.386715 | 0.787855 |
| Operations and Procedures  | Fixation of rectum for prolapse                               | T | 378957 | 293    | 378808 | 0.746 | -0.29319 | 0.338842 | 0.384    | 1.45     | 0.386896 | 0.787855 |
| Symptoms                   | Haemorrhage from respiratory passages (HES)                   | T | 378957 | 4000   | 375101 | 1.07  | 0.068452 | 0.079209 | 0.917    | 1.25     | 0.387478 | 0.788374 |
| Operations and Procedures  | Diagnostic imaging of digestive tract                         | T | 378957 | 243    | 378858 | 0.718 | -0.33134 | 0.383697 | 0.338    | 1.52     | 0.387835 | 0.788434 |
| Summary                    | HESCH Diseases of the skin and subcutaneous tissue (HES)      | T | 378957 | 37154  | 341947 | 1.02  | 0.023919 | 0.027826 | 0.97     | 1.08     | 0.390017 | 0.791503 |
| Operations and Procedures  | Other repair of prolapse of vagina                            | T | 378957 | 7298   | 371803 | 1.05  | 0.051352 | 0.059719 | 0.936    | 1.18     | 0.389845 | 0.791503 |
| Operations and Procedures  | Other operations on fallopian tube                            | T | 378957 | 950    | 378151 | 0.856 | -0.15598 | 0.181581 | 0.599    | 1.22     | 0.39033  | 0.791503 |
| Summary                    | Behav syn assoc with phys disturb and phys fact (HES)         | T | 378957 | 424    | 378677 | 1.22  | 0.19517  | 0.229356 | 0.775    | 1.91     | 0.394798 | 0.795294 |
| Digestive system           | Umbilical hernia (HES)                                        | T | 378957 | 3437   | 375664 | 0.926 | -0.07706 | 0.090975 | 0.775    | 1.11     | 0.39699  | 0.795294 |
| Musculoskeletal            | Scoliosis (HES)                                               | T | 378957 | 942    | 378159 | 0.86  | -0.15074 | 0.177552 | 0.607    | 1.22     | 0.395887 | 0.795294 |
| Genitourinary              | Hydrocele and spermatocele (HES)                              | T | 378957 | 1221   | 377880 | 1.13  | 0.11889  | 0.139844 | 0.856    | 1.48     | 0.395234 | 0.795294 |
| Gynaecology and Obstetrics | Unspecified maternal hypertension (HES)                       | T | 378957 | 540    | 378561 | 1.19  | 0.171951 | 0.20308  | 0.798    | 1.77     | 0.397152 | 0.795294 |
| Medication                 | Antiepileptics                                                | T | 378957 | 6896   | 372205 | 0.947 | -0.05412 | 0.063918 | 0.836    | 1.07     | 0.397113 | 0.795294 |
| Cancer                     | Car in situ other genital (cancer register)                   | T | 378957 | 466    | 378635 | 0.8   | -0.22315 | 0.262736 | 0.478    | 1.34     | 0.395696 | 0.795294 |
| Operations and Procedures  | Other therapeutic operations on oesophagus                    | T | 378957 | 331    | 378770 | 1.24  | 0.218118 | 0.256561 | 0.752    | 2.06     | 0.395236 | 0.795294 |
| Operations and Procedures  | Catheterisation of heart                                      | T | 378957 | 776    | 378325 | 1.16  | 0.146051 | 0.171056 | 0.828    | 1.62     | 0.393207 | 0.795294 |
| Operations and Procedures  | Primary excision of cervical intervertebral disc              | T | 378957 | 805    | 378296 | 0.846 | -0.16707 | 0.196002 | 0.576    | 1.24     | 0.393999 | 0.795294 |
| Gynaecology and Obstetrics | Uterine polyps (HES and self-reported)                        | T | 378957 | 8016   | 371085 | 1.05  | 0.048175 | 0.056808 | 0.939    | 1.17     | 0.396423 | 0.795294 |
| ENT                        | Vocal cord poly (HES and self-reported)                       | T | 378957 | 392    | 378709 | 0.779 | -0.24913 | 0.293404 | 0.439    | 1.39     | 0.395826 | 0.795294 |
| Cardiovascular             | Pericarditis (HES and self-reported)                          | T | 378957 | 1193   | 377908 | 0.875 | -0.13371 | 0.157431 | 0.643    | 1.19     | 0.395703 | 0.795294 |
| Immuno-inflammation        | Allergy to house dust mite (HES and self-reported)            | T | 378957 | 279    | 378822 | 1.26  | 0.232416 | 0.274489 | 0.737    | 2.16     | 0.397149 | 0.795294 |
| Cardiovascular             | QRS duration                                                  | T | 8938   | NA     | NA     | NA    | 0.048524 | 0.057018 | -0.06233 | 0.160279 | 0.394755 | 0.795294 |
| Medication                 | Antivertigo preparations                                      | T | 378957 | 1504   | 377597 | 1.11  | 0.106708 | 0.126288 | 0.869    | 1.43     | 0.398311 | 0.796593 |
| Gynaecology and Obstetrics | Ectopic pregnancy (HES)                                       | T | 378957 | 264    | 378837 | 0.739 | -0.30242 | 0.360181 | 0.365    | 1.5      | 0.401109 | 0.797912 |
| Symptoms                   | Cardiac murmurs and other cardiac sounds (HES)                | T | 378957 | 965    | 378136 | 1.14  | 0.130078 | 0.154641 | 0.841    | 1.54     | 0.400257 | 0.797912 |
| Operations and Procedures  | Other operations on retina                                    | T | 378957 | 498    | 378603 | 0.807 | -0.21418 | 0.254384 | 0.49     | 1.33     | 0.399819 | 0.797912 |
| Operations and Procedures  | Therapeutic transluminal operations on heart                  | T | 378957 | 862    | 378239 | 0.855 | -0.15647 | 0.186172 | 0.594    | 1.23     | 0.40066  | 0.797912 |
| Operations and Procedures  | Repair of recurrent inguinal hernia                           | T | 378957 | 1175   | 377926 | 1.13  | 0.118965 | 0.141286 | 0.854    | 1.49     | 0.39978  | 0.797912 |
| Digestive system           | Inflammatory bowel disease (HES and self-reported)            | T | 378957 | 4246   | 374855 | 1.07  | 0.064541 | 0.076864 | 0.917    | 1.24     | 0.401084 | 0.797912 |
| Musculoskeletal            | Spine BMD bone mineral density                                | T | 4100   | NA     | NA     | NA    | -0.07259 | 0.0863   | -0.24174 | 0.096561 | 0.400293 | 0.797912 |
| Symptoms                   | Unspecified haematuria (HES)                                  | T | 378957 | 14238  | 364863 | 1.04  | 0.036207 | 0.043183 | 0.953    | 1.13     | 0.401774 | 0.798576 |
| Digestive system           | Crohn s disease (HES)                                         | T | 378957 | 1547   | 377554 | 1.11  | 0.104036 | 0.124351 | 0.87     | 1.42     | 0.402797 | 0.79929  |
| Operations and Procedures  | Examination of organ NOC                                      | T | 378957 | 581    | 378520 | 1.18  | 0.165214 | 0.197353 | 0.801    | 1.74     | 0.402507 | 0.79929  |
| Medication                 | Vasodilators used in cardiac diseases                         | T | 378957 | 5385   | 373716 | 0.941 | -0.06079 | 0.072844 | 0.816    | 1.09     | 0.404009 | 0.800376 |
| Operations and Procedures  | Soft tissue operations on joint of toe                        | T | 378957 | 2721   | 376380 | 0.918 | -0.08558 | 0.102494 | 0.751    | 1.12     | 0.403718 | 0.800376 |
| Summary                    | Disorders of skin appendages (HES)                            | T | 378957 | 9390   | 369711 | 1.04  | 0.04392  | 0.052751 | 0.942    | 1.16     | 0.405068 | 0.800792 |
| Operations and Procedures  | Excision of other artery                                      | T | 378957 | 498    | 378603 | 1.19  | 0.174493 | 0.209641 | 0.789    | 1.8      | 0.405216 | 0.800792 |
| Operations and Procedures  | Other destruction of lesion of skin of head or neck           | T | 378957 | 325    | 378776 | 0.765 | -0.26774 | 0.321411 | 0.408    | 1.44     | 0.404836 | 0.800792 |
| Operations and Procedures  | Elective caesarean delivery                                   | T | 378957 | 1697   | 377404 | 1.11  | 0.10032  | 0.120658 | 0.873    | 1.4      | 0.405725 | 0.801141 |
| Summary                    | HESCH Chapter IX Diseases of the circulatory system BIN (HES) | T | 378957 | 117038 | 262063 | 0.985 | -0.01552 | 0.018743 | 0.949    | 1.02     | 0.407616 | 0.802272 |
| ENT                        | Perforation of tympanic membrane (HES)                        | T | 378957 | 870    | 378231 | 1.15  | 0.135699 | 0.164123 | 0.83     | 1.58     | 0.408343 | 0.802272 |
| Mental health              | Seen a psychiatrist for nerves anxiety tension or depression  | T | 377176 | 43632  | 333688 | 0.978 | -0.0218  | 0.026309 | 0.929    | 1.03     | 0.407366 | 0.802272 |
| Operations and Procedures  | Extrirpation of lesion of penis                               | T | 378957 | 221    | 378880 | 1.29  | 0.256084 | 0.309696 | 0.704    | 2.37     | 0.4083   | 0.802272 |
| Operations and Procedures  | Freeing of tendon                                             | T | 378957 | 652    | 378449 | 1.17  | 0.154845 | 0.187195 | 0.809    | 1.68     | 0.408311 | 0.802272 |
| Infectious disease         | Mumps epidemic parotitis (HES and self-reported)              | T | 378957 | 830    | 378271 | 1.15  | 0.136075 | 0.164347 | 0.83     | 1.58     | 0.407688 | 0.802272 |
| Eye                        | Corneal resistance factor left                                | T | 81021  | NA     | NA     | NA    | -0.01469 | 0.017774 | -0.04952 | 0.02015  | 0.408629 | 0.802272 |
| Medication                 | Antibiotics for topical use                                   | T | 378957 | 1432   | 377669 | 1.11  | 0.106756 | 0.130165 | 0.862    | 1.44     | 0.412127 | 0.803122 |
| Medication                 | Corticosteroids other combinations                            | T | 378957 | 9688   | 369413 | 1.04  | 0.041813 | 0.051814 | 0.942    | 1.15     | 0.41968  | 0.803122 |
| Summary                    | Other osteopathies (HES)                                      | T | 378957 | 2866   | 376235 | 0.921 | -0.08217 | 0.099805 | 0.757    | 1.12     | 0.410319 | 0.803122 |
| Summary                    | Congenital malformations of genital organs (HES)              | T | 378957 | 628    | 378473 | 0.836 | -0.17957 | 0.222194 | 0.541    | 1.29     | 0.418985 | 0.803122 |
| Eye                        | Disorders of refraction and accommodation (HES)               | T | 378957 | 1639   | 377462 | 1.1   | 0.097707 | 0.120161 | 0.871    | 1.4      | 0.416142 | 0.803122 |
| Respiratory                | Diseases of vocal cords and larynx (HES)                      | T | 378957 | 1561   | 377540 | 0.895 | -0.11095 | 0.137606 | 0.683    | 1.17     | 0.420064 | 0.803122 |
| Immuno-inflammation        | Cellulitis (HES)                                              | T | 378957 | 6570   | 372531 | 0.948 | -0.05317 | 0.065368 | 0.834    | 1.08     | 0.415995 | 0.803122 |
| Genitourinary              | Redundant prepuce phimosis and paraphimosis (HES)             | T | 378957 | 1890   | 377211 | 1.1   | 0.093442 | 0.114975 | 0.876    | 1.38     | 0.416381 | 0.803122 |
| Gynaecology and Obstetrics | Gestational hypertension with significant proteinuria (HES)   | T | 378957 | 289    | 378812 | 0.758 | -0.27767 | 0.339916 | 0.389    | 1.47     | 0.413991 | 0.803122 |
| Gynaecology and Obstetrics | Retained placenta and membranes without haemorrhage (HES)     | T | 378957 | 203    | 378898 | 0.715 | -0.33508 | 0.415398 | 0.317    | 1.61     | 0.419873 | 0.803122 |
| Medication                 | Throat preparations                                           | T | 378957 | 49826  | 329275 | 1.02  | 0.020159 | 0.024656 | 0.972    | 1.07     | 0.413566 | 0.803122 |
| Medication                 | Mydriatics and cycloplegics                                   | T | 378957 | 287    | 378814 | 1.25  | 0.221605 | 0.274272 | 0.729    | 2.14     | 0.419105 | 0.803122 |
| Gynaecology and Obstetrics | Gynaecological surgery (self-reported)                        | T | 378957 | 2168   | 376933 | 1.09  | 0.086545 | 0.105584 | 0.887    | 1.34     | 0.412397 | 0.803122 |
| Operations and Procedures  | Cystoscopy (self-reported)                                    | T | 378957 | 345    | 378756 | 0.779 | -0.24989 | 0.30668  | 0.427    | 1.42     | 0.415181 | 0.803122 |
| Operations and Procedures  | Operations on lower respiratory tract                         | T | 378957 | 209    | 378892 | 0.716 | -0.33421 | 0.414465 | 0.318    | 1.61     | 0.420038 | 0.803122 |
| Operations and Procedures  | Attention to artificial opening into ileum                    | T | 378957 | 998    | 378103 | 1.13  | 0.124342 | 0.152884 | 0.399    | 1.53     | 0.416041 | 0.803122 |
| Operations and Procedures  | Other exteriorisation of colon                                | T | 378957 | 934    | 378167 | 1.14  | 0.130043 | 0.158224 | 0.835    | 1.55     | 0.411141 | 0.803122 |
| Operations and Procedures  | Diagnostic endoscopic retrograde examination of bile duct     | T | 378957 | 309    | 378792 | 1.24  | 0.215174 | 0.264968 | 0.738    | 2.08     | 0.41675  | 0.803122 |
| Operations and Procedures  | Endoscopic ultrasound examination of pancreas                 | T | 378957 | 605    | 378496 | 1.17  | 0.158159 | 0.193799 | 0.801    | 1.71     | 0.414446 | 0.803122 |
| Operations and Procedures  | Other operations on vena cava                                 | T | 378957 | 207    | 378894 | 0.713 | -0.33851 | 0.414446 | 0.316    | 1.61     | 0.414052 | 0.803122 |
| Operations and Procedures  | Transplantation of kidney                                     | T | 378957 | 266    | 378835 | 1.26  | 0.233822 | 0.284642 | 0.723    | 2.21     | 0.411384 | 0.803122 |
| Operations and Procedures  | Other operations on nail bed                                  | T | 378957 | 686    | 378415 | 0.84  | -0.17414 | 0.212353 | 0.554    | 1.27     | 0.412201 | 0.803122 |
| Operations and Procedures  | Image controlled operations on abdominal cavity               | T | 378957 | 419    | 378682 | 1.2   | 0.185574 | 0.22942  | 0.768    | 1.89     | 0.418583 | 0.803122 |
| Operations and Procedures  | Biopsy of muscle                                              | T | 378957 | 421    | 378680 | 1.21  | 0.187043 | 0.229351 | 0.769    | 1.89     | 0.414767 | 0.803122 |
| Operations and Procedures  | Diagnostic endocrinology                                      | T | 378957 | 1212   | 378889 | 0.881 | -0.12686 | 0.157307 | 0.647    | 1.2      | 0.419989 | 0.803122 |
| Operations and Procedures  | Other operations on intervertebral disc                       | T | 378957 | 298    | 378803 | 0.759 | -0.27531 | 0.338683 | 0.391    | 1.47     | 0.416283 | 0.803122 |
| Operations and Procedures  | Anaesthetic without surgery                                   | T | 378957 | 299    | 378802 | 0.76  | -0.27404 | 0.33869  | 0.391    | 1.48     | 0.41844  | 0.803122 |
| NA                         | Stroke                                                        | T | 378957 | 8703   | 370398 | 0.955 | -0.0459  | 0.056857 | 0.854    | 1.07     | 0.419486 | 0.803122 |
| Cardiovascular             | Pericardial problem (HES and self-reported)                   | T |        |        |        |       |          |          |          |          |          |          |

|                            |                                                                     |   |        |       |        |       |          |          |          |          |          |          |
|----------------------------|---------------------------------------------------------------------|---|--------|-------|--------|-------|----------|----------|----------|----------|----------|----------|
| Operations and Procedures  | Other operations on vulva                                           | T | 378957 | 1300  | 377801 | 0.888 | -0.11879 | 0.150627 | 0.661    | 1.19     | 0.430331 | 0.806745 |
| Musculoskeletal            | Other rheumatoid arthritis (HES)                                    | T | 378957 | 3989  | 375112 | 1.06  | 0.06258  | 0.079423 | 0.911    | 1.24     | 0.430735 | 0.806875 |
| Digestive system           | Irritable bowel syndrome (HES and self-reported)                    | T | 378957 | 12379 | 366722 | 1.04  | 0.036314 | 0.046156 | 0.947    | 1.14     | 0.431426 | 0.807541 |
| Symptoms                   | Abnormalities of breathing (HES)                                    | T | 378957 | 8413  | 370688 | 0.956 | -0.0454  | 0.057866 | 0.853    | 1.07     | 0.432715 | 0.808614 |
| Medication                 | Hepatic and reticulo endothelial system                             | T | 378957 | 1728  | 377373 | 0.903 | -0.1017  | 0.129709 | 0.7      | 1.16     | 0.432636 | 0.808614 |
| Musculoskeletal            | Fracture thumb (HES and self-reported)                              | T | 378957 | 379   | 378722 | 0.794 | -0.23019 | 0.293959 | 0.447    | 1.41     | 0.433006 | 0.808614 |
| Operations and Procedures  | Excision of vulva                                                   | T | 378957 | 1147  | 377954 | 1.12  | 0.112538 | 0.143771 | 0.844    | 1.48     | 0.43377  | 0.809413 |
| Gynaecology and Obstetrics | Infections of genitourinary tract in pregnancy (HES)                | T | 378957 | 212   | 378889 | 1.28  | 0.243507 | 0.311363 | 0.693    | 2.35     | 0.434174 | 0.80954  |
| ENT                        | Other disorders of tympanic membrane (HES)                          | T | 378957 | 333   | 378768 | 1.22  | 0.200329 | 0.256463 | 0.739    | 2.02     | 0.434773 | 0.809949 |
| Neurosciences              | Parkinsons disease (HES and self-reported)                          | T | 378957 | 1191  | 377910 | 0.886 | -0.12149 | 0.15579  | 0.653    | 1.2      | 0.435507 | 0.81077  |
| Summary                    | Disorders of adult personality and behaviour (HES)                  | T | 378957 | 350   | 378751 | 0.788 | -0.23873 | 0.306594 | 0.432    | 1.44     | 0.43619  | 0.811414 |
| Medication                 | Antibesity preparations excl diet products                          | T | 378957 | 958   | 378143 | 0.871 | -0.13798 | 0.177427 | 0.615    | 1.23     | 0.436755 | 0.811839 |
| Summary                    | Abnormal findings on examination of blood without diagnosis (HES)   | T | 378957 | 7295  | 371806 | 1.05  | 0.046165 | 0.059543 | 0.932    | 1.18     | 0.438157 | 0.812897 |
| Mental health              | Recurrent depressive disorder (HES)                                 | T | 378957 | 679   | 378422 | 0.849 | -0.1642  | 0.212368 | 0.56     | 1.29     | 0.43942  | 0.812897 |
| Gynaecology and Obstetrics | Maternal care for other known or suspected fetal problems (HES)     | T | 378957 | 1716  | 377385 | 1.1   | 0.092721 | 0.120391 | 0.867    | 1.39     | 0.440044 | 0.812897 |
| Operations and Procedures  | Urethral stricture surgery dilatation (self-reported)               | T | 378957 | 205   | 378896 | 0.726 | -0.32003 | 0.414518 | 0.322    | 1.64     | 0.440087 | 0.812897 |
| Mental health              | Probable recurrent major depression severe 2                        | T | 54180  | 7072  | 47141  | 1.05  | 0.04991  | 0.064356 | 0.927    | 1.19     | 0.438026 | 0.812897 |
| Cancer                     | Mal neo stomach (cancer register)                                   | T | 378957 | 377   | 378724 | 1.21  | 0.187013 | 0.241897 | 0.775    | 1.94     | 0.439456 | 0.812897 |
| Operations and Procedures  | Exteriorisation of trachea                                          | T | 378957 | 817   | 378284 | 0.862 | -0.1485  | 0.192606 | 0.591    | 1.26     | 0.440699 | 0.812897 |
| Operations and Procedures  | Other repair of vagina                                              | T | 378957 | 332   | 378769 | 1.22  | 0.198051 | 0.256617 | 0.737    | 2.02     | 0.440246 | 0.812897 |
| Gynaecology and Obstetrics | Uterine problem (HES and self-reported)                             | T | 378957 | 29689 | 349412 | 1.02  | 0.024529 | 0.031746 | 0.963    | 1.09     | 0.439733 | 0.812897 |
| ENT                        | Speech reception threshold SRT estimate right                       | T | 114757 | NA    | NA     | NA    | 0.011547 | 0.014905 | -0.01767 | 0.040761 | 0.438529 | 0.812897 |
| Genitourinary              | Unspecified renal colic (HES)                                       | T | 378957 | 1752  | 377349 | 1.1   | 0.091235 | 0.118427 | 0.869    | 1.38     | 0.441069 | 0.812957 |
| Summary                    | Disorders of breast (HES)                                           | T | 378957 | 4857  | 374244 | 0.943 | -0.05853 | 0.076171 | 0.812    | 1.1      | 0.442236 | 0.813107 |
| Metabolic                  | Vitamin D deficiency (HES)                                          | T | 378957 | 359   | 378742 | 1.21  | 0.19115  | 0.248753 | 0.743    | 1.97     | 0.442231 | 0.813107 |
| Digestive system           | Other diseases of digestive system (HES)                            | T | 378957 | 8428  | 370673 | 0.957 | -0.0444  | 0.057756 | 0.854    | 1.07     | 0.442056 | 0.813107 |
| Musculoskeletal            | Disorders of continuity of bone (HES)                               | T | 378957 | 1398  | 377703 | 1.11  | 0.100789 | 0.131241 | 0.855    | 1.43     | 0.442506 | 0.813107 |
| Medication                 | Antiinflammatory agents                                             | T | 378957 | 18165 | 360936 | 0.97  | -0.03032 | 0.039503 | 0.898    | 1.05     | 0.442838 | 0.813107 |
| Summary                    | Hernia (HES)                                                        | T | 378957 | 42709 | 336392 | 1.02  | 0.020299 | 0.026485 | 0.969    | 1.07     | 0.443411 | 0.81327  |
| Musculoskeletal            | Prolapsed disclipped disc (HES and self-reported)                   | T | 378957 | 8220  | 370881 | 1.04  | 0.043001 | 0.056128 | 0.935    | 1.17     | 0.443602 | 0.81327  |
| Musculoskeletal            | Psoriatic and enteropathic arthropathies (HES)                      | T | 378957 | 650   | 378451 | 1.16  | 0.145149 | 0.190249 | 0.796    | 1.68     | 0.445496 | 0.813647 |
| Family history             | Alzheimer s disease dementia (family history - mother)              | T | 357389 | 29815 | 327714 | 0.976 | -0.02393 | 0.031341 | 0.918    | 1.04     | 0.44518  | 0.813647 |
| Operations and Procedures  | Other repair of peripheral nerve                                    | T | 378957 | 526   | 378575 | 0.828 | -0.18882 | 0.246758 | 0.51     | 1.34     | 0.444164 | 0.813647 |
| Operations and Procedures  | Shave biopsy of skin                                                | T | 378957 | 626   | 378475 | 1.16  | 0.145561 | 0.190436 | 0.796    | 1.68     | 0.444657 | 0.813647 |
| Eye                        | Retinal arteryvein occlusion (HES and self-reported)                | T | 378957 | 614   | 378487 | 0.844 | -0.16977 | 0.222364 | 0.546    | 1.3      | 0.445184 | 0.813647 |
| Genitourinary              | Glomerulonephritis (HES and self-reported)                          | T | 378957 | 1746  | 377355 | 1.09  | 0.089719 | 0.117705 | 0.869    | 1.38     | 0.445923 | 0.813809 |
| Operations and Procedures  | Transluminal operations on cerebral artery                          | T | 378957 | 1001  | 378100 | 1.12  | 0.117588 | 0.154474 | 0.831    | 1.52     | 0.44653  | 0.8143   |
| Operations and Procedures  | Open excision of prostate                                           | T | 378957 | 2046  | 377055 | 0.915 | -0.08905 | 0.117187 | 0.727    | 1.15     | 0.447341 | 0.815162 |
| Respiratory                | Cough on most days                                                  | T | 95656  | 13048 | 82648  | 0.964 | -0.03658 | 0.048219 | 0.877    | 1.06     | 0.448018 | 0.815163 |
| Digestive system           | Gastrointestinal bleeding (HES and self-reported)                   | T | 378957 | 8293  | 370808 | 0.957 | -0.04419 | 0.058206 | 0.854    | 1.07     | 0.447779 | 0.815163 |
| Neurosciences              | Mononeuropathy in diseases classified elsewhere (HES)               | T | 378957 | 205   | 378896 | 0.731 | -0.31399 | 0.414587 | 0.324    | 1.65     | 0.448831 | 0.815163 |
| Operations and Procedures  | Examination of oesophagus                                           | T | 378957 | 1296  | 378805 | 0.891 | -0.11522 | 0.152048 | 0.662    | 1.2      | 0.448567 | 0.815163 |
| Operations and Procedures  | Manipulation of spine                                               | T | 378957 | 218   | 378883 | 1.26  | 0.236369 | 0.30967  | 0.868    | 2.32     | 0.450562 | 0.817938 |
| Gynaecology and Obstetrics | Dilatation and curettage d c (self-reported)                        | T | 378957 | 21385 | 357716 | 1.03  | 0.027513 | 0.0365   | 0.957    | 1.1      | 0.450994 | 0.818106 |
| Operations and Procedures  | Extracorporeal fragmentation of calculus of ureter                  | T | 378957 | 563   | 378538 | 0.839 | -0.17588 | 0.233703 | 0.531    | 1.33     | 0.451715 | 0.818182 |
| Biological assays          | Urine albumin creatinine ratio                                      | T | 114243 | NA    | NA     | NA    | 0.011187 | 0.014856 | -0.01793 | 0.040305 | 0.451414 | 0.818182 |
| Medication                 | Antihypertensive preparations                                       | T | 378957 | 334   | 378767 | 1.21  | 0.190023 | 0.256478 | 0.731    | 2        | 0.458759 | 0.818629 |
| Summary                    | Deforming dorsopathies (HES)                                        | T | 378957 | 2539  | 376562 | 0.924 | -0.07881 | 0.10503  | 0.752    | 1.14     | 0.453036 | 0.818629 |
| Neurosciences              | Parkinson s disease (HES)                                           | T | 378957 | 1054  | 378047 | 0.884 | -0.12283 | 0.165668 | 0.639    | 1.22     | 0.458441 | 0.818629 |
| Neurosciences              | Migraine (HES)                                                      | T | 378957 | 2516  | 376585 | 0.925 | -0.07835 | 0.106105 | 0.751    | 1.14     | 0.460268 | 0.818629 |
| Eye                        | Other disorders of optic (HES)                                      | T | 378957 | 285   | 378816 | 0.776 | -0.25404 | 0.338935 | 0.399    | 1.51     | 0.453535 | 0.818629 |
| Cardiovascular             | Other disorders of arteries and arterioles (HES)                    | T | 378957 | 1296  | 378805 | 0.895 | -0.11128 | 0.150569 | 0.666    | 1.2      | 0.459884 | 0.818629 |
| Digestive system           | Peptic ulcer site unspecified (HES)                                 | T | 378957 | 370   | 378731 | 1.2   | 0.184853 | 0.24863  | 0.739    | 1.96     | 0.457187 | 0.818629 |
| Immuno-inflammation        | Corns and callosities (HES)                                         | T | 378957 | 257   | 378844 | 0.766 | -0.26654 | 0.359425 | 0.379    | 1.55     | 0.458353 | 0.818629 |
| Symptoms                   | Cough (HES)                                                         | T | 378957 | 2614  | 376487 | 1.07  | 0.071918 | 0.097434 | 0.888    | 1.3      | 0.46044  | 0.818629 |
| Symptoms                   | Headache (HES)                                                      | T | 378957 | 6991  | 372110 | 0.954 | -0.04757 | 0.063342 | 0.842    | 1.08     | 0.452653 | 0.818629 |
| Cancer                     | Malignant melanoma (self-reported)                                  | T | 378957 | 2994  | 376107 | 1.07  | 0.067409 | 0.090802 | 0.895    | 1.28     | 0.460266 | 0.818629 |
| Gynaecology and Obstetrics | Uterine surgery (self-reported)                                     | T | 378957 | 1594  | 377507 | 0.905 | -0.09956 | 0.134296 | 0.696    | 1.18     | 0.458496 | 0.818629 |
| Family history             | High blood pressure (family history - father)                       | T | 343458 | 74698 | 268894 | 0.984 | -0.01591 | 0.021463 | 0.944    | 1.03     | 0.458477 | 0.818629 |
| Operations and Procedures  | Repair of eardrum                                                   | T | 378957 | 1054  | 378047 | 1.12  | 0.118119 | 0.151064 | 0.832    | 1.5      | 0.459175 | 0.818629 |
| Operations and Procedures  | Excision of oesophagus and stomach                                  | T | 378957 | 219   | 378882 | 1.26  | 0.229921 | 0.309744 | 0.686    | 2.31     | 0.457909 | 0.818629 |
| Operations and Procedures  | Excision of ileum                                                   | T | 378957 | 732   | 378369 | 1.14  | 0.131969 | 0.178434 | 0.804    | 1.62     | 0.459544 | 0.818629 |
| Operations and Procedures  | Destruction of haemorrhoid                                          | T | 378957 | 5384  | 373717 | 1.05  | 0.051457 | 0.069405 | 0.919    | 1.21     | 0.458453 | 0.818629 |
| Operations and Procedures  | Other evacuation of contents of uterus                              | T | 378957 | 2583  | 376518 | 0.924 | -0.07903 | 0.107177 | 0.749    | 1.14     | 0.46091  | 0.818629 |
| Operations and Procedures  | Primary open reduction of intra articular fracture of bone          | T | 378957 | 292   | 378809 | 0.777 | -0.25172 | 0.338788 | 0.4      | 1.51     | 0.457488 | 0.818629 |
| Operations and Procedures  | Other interposition reconstruction of joint                         | T | 378957 | 307   | 378794 | 0.787 | -0.23981 | 0.321795 | 0.419    | 1.48     | 0.456134 | 0.818629 |
| Operations and Procedures  | Delivery of oral chemotherapy for neoplasm                          | T | 378957 | 560   | 378541 | 0.84  | -0.17392 | 0.233636 | 0.532    | 1.33     | 0.456638 | 0.818629 |
| Operations and Procedures  | Other destruction of lesion of organ NOC                            | T | 378957 | 2552  | 376549 | 0.925 | -0.07821 | 0.104954 | 0.753    | 1.14     | 0.456174 | 0.818629 |
| Respiratory                | Pleurisy (HES and self-reported)                                    | T | 378957 | 1687  | 377414 | 0.908 | -0.0964  | 0.130737 | 0.703    | 1.17     | 0.460919 | 0.818629 |
| Neurosciences              | Dementiaalzheimerscognitive impairment (HES and self-reported)      | T | 378957 | 906   | 378195 | 1.13  | 0.119318 | 0.160402 | 0.823    | 1.54     | 0.456956 | 0.818629 |
| Musculoskeletal            | Sclerodermasystemic sclerosis (HES and self-reported)               | T | 378957 | 201   | 378900 | 0.736 | -0.30698 | 0.414732 | 0.326    | 1.66     | 0.459186 | 0.818629 |
| Immuno-inflammation        | Cellulitis (HES and self-reported)                                  | T | 378957 | 6668  | 372433 | 0.953 | -0.04771 | 0.064738 | 0.84     | 1.08     | 0.461137 | 0.818629 |
| Neurosciences              | Incorect matches summed                                             | T | 378957 | NA    | NA     | NA    | -0.00621 | 0.00831  | -0.0225  | 0.010078 | 0.454968 | 0.818629 |
| Operations and Procedures  | Continuous infusion of therapeutic substance                        | T | 378957 | 8393  | 370708 | 0.958 | -0.0426  | 0.057953 | 0.855    | 1.07     | 0.462257 | 0.820131 |
| Medication                 | Stomatological preparations                                         | T | 378957 | 59623 | 319478 | 0.983 | -0.01696 | 0.023653 | 0.939    | 1.03     | 0.473298 | 0.821031 |
| Medication                 | Iron preparations                                                   | T | 378957 | 19982 | 359119 | 0.973 | -0.0277  | 0.037806 | 0.933    | 1.05     | 0.463792 | 0.821031 |
| Summary                    | Extrapyramidal and movement disorders (HES)                         | T | 378957 | 1814  | 377287 | 0.914 | -0.09013 | 0.124927 | 0.715    | 1.17     | 0.470621 | 0.821031 |
| Summary                    | Symptoms and signs involving the digestive system and abdomen (HES) | T | 378957 | 52090 | 327011 | 1.02  | 0.017657 | 0.024145 | 0.911    | 1.07     | 0.464598 | 0.821031 |
| Mental health              | Somatoform disorders (HES)                                          | T | 378957 | 381   | 378720 | 1.19  | 0.176518 | 0.241721 | 0.743    | 1.92     | 0.465235 | 0.821031 |
| Neurosciences              | Inflammatory polyneuropathy (HES)                                   | T | 378957 | 268   | 378833 | 1.23  | 0.207329 | 0.284593 | 0.704    | 2.15     | 0.466301 | 0.821031 |
| Neurosciences              | Hydrocephalus (HES)                                                 | T | 378957 | 402   | 378699 | 1.19  | 0.172602 | 0.235283 | 0.749    | 1.88     | 0.463197 | 0.821031 |
| Digestive system           | Gastric ulcer (HES)                                                 | T | 378957 | 3863  | 375238 | 0.94  | -0.06175 | 0.085461 | 0.795    | 1.11     | 0.469945 | 0.821031 |
| Digestive system           | Femoral hernia (HES)                                                | T | 378957 | 558   | 378543 | 0.845 | -0.16804 | 0.233687 | 0.535    | 1.34     | 0.472087 | 0.821031 |
| Immuno-inflammation        | Granulomatous disorders of skin and subcutaneous tissue (HES)       | T | 378957 | 534   | 378567 | 0.841 | -0.17296 | 0.239999 | 0.526    | 1.35     | 0.471126 | 0.821031 |
| Genitourinary              | Orchitis and epididymitis (HES)                                     | T | 378957 | 769   | 378332 | 0.866 | -0.144   | 0.199976 | 0.585    | 1.28     | 0.471477 | 0.821031 |
| Medication                 | Combinations of antibacterials                                      | T | 378957 | 595   | 378506 | 0.849 | -0.16342 | 0.227685 | 0.544    | 1.33     | 0.472906 | 0.821031 |
| ENT                        | Nasal sinus nose surgery (self-reported)                            | T | 378957 | 13231 | 365870 | 1.03  | 0.032384 | 0.044961 | 0.946    | 1.13     | 0.471359 | 0.821031 |
| Operations and Procedures  | Radical prostatectomy (self-reported)                               | T | 378957 | 1237  | 377864 | 0.896 | -0.10932 | 0.151257 | 0.666    | 1.21     |          |          |

|                            |                                                                  |   |        |       |        |       |          |          |          |          |          |          |
|----------------------------|------------------------------------------------------------------|---|--------|-------|--------|-------|----------|----------|----------|----------|----------|----------|
| Medication                 | Antimycotics for systemic use                                    | T | 378957 | 389   | 378712 | 1.19  | 0.170292 | 0.241596 | 0.738    | 1.9      | 0.480897 | 0.825245 |
| Operations and Procedures  | Nephrectomy kidney removed (self-reported)                       | T | 378957 | 1353  | 377748 | 1.1   | 0.093983 | 0.13346  | 0.846    | 1.43     | 0.481307 | 0.825245 |
| Cardiovascular             | Ecg electrocardiogram (self-reported)                            | T | 378957 | 201   | 378900 | 0.747 | -0.29229 | 0.41617  | 0.331    | 1.68     | 0.48084  | 0.825245 |
| Metabolic                  | Gestational diabetes (HES and self-reported)                     | T | 378957 | 363   | 378738 | 0.813 | -0.20747 | 0.294019 | 0.457    | 1.45     | 0.480424 | 0.825245 |
| Summary                    | Glaucoma (HES)                                                   | T | 378957 | 4048  | 375053 | 1.06  | 0.054909 | 0.07841  | 0.906    | 1.23     | 0.48375  | 0.825321 |
| Neurosciences              | Hemiplegia (HES)                                                 | T | 378957 | 1363  | 377738 | 1.1   | 0.093584 | 0.133451 | 0.845    | 1.43     | 0.483143 | 0.825321 |
| Family history             | Severe depression (family history - father)                      | T | 338597 | 12638 | 326091 | 1.03  | 0.032106 | 0.045647 | 0.944    | 1.13     | 0.481844 | 0.825321 |
| ENT                        | Hearing difficulty problems                                      | T | 363510 | 94775 | 268869 | 1.01  | 0.013761 | 0.019625 | 0.976    | 1.05     | 0.483189 | 0.825321 |
| Operations and Procedures  | Other open operations on uterus                                  | T | 378957 | 285   | 378816 | 0.788 | -0.2381  | 0.399141 | 0.405    | 1.53     | 0.482641 | 0.825321 |
| Neurosciences              | Neck or shoulder pain                                            | T | 378087 | 92289 | 285942 | 1.01  | 0.013574 | 0.019373 | 0.976    | 1.05     | 0.48351  | 0.825321 |
| Neurosciences              | Brain haemorrhage (HES and self-reported)                        | T | 378957 | 1057  | 378044 | 0.89  | -0.11632 | 0.16557  | 0.643    | 1.23     | 0.482327 | 0.825321 |
| Biological assays          | Neutrophil count                                                 | T | 367067 | NA    | NA     | NA    | -0.0059  | 0.008443 | -0.02245 | 0.010647 | 0.484565 | 0.826127 |
| Medication                 | Corticosteroids combinations with antiseptics                    | T | 378957 | 6117  | 372984 | 1.05  | 0.04513  | 0.064699 | 0.922    | 1.19     | 0.485464 | 0.826397 |
| Neurosciences              | Disorders of trigeminal nerve (HES)                              | T | 378957 | 419   | 378682 | 0.827 | -0.18947 | 0.272066 | 0.485    | 1.41     | 0.486174 | 0.826397 |
| Eye                        | Other disorders of eyelid (HES)                                  | T | 378957 | 5168  | 373933 | 1.05  | 0.048777 | 0.070139 | 0.915    | 1.2      | 0.486782 | 0.826397 |
| Gynaecology and Obstetrics | Hysteroscopy biopsy (self-reported)                              | T | 378957 | 1325  | 377776 | 1.1   | 0.093728 | 0.134775 | 0.843    | 1.43     | 0.48678  | 0.826397 |
| Operations and Procedures  | Excision of lesion of tissue of brain                            | T | 378957 | 434   | 378667 | 1.17  | 0.159478 | 0.229186 | 0.748    | 1.84     | 0.486525 | 0.826397 |
| Gynaecology and Obstetrics | Pelvic inflammatory disease pid (HES and self-reported)          | T | 378957 | 4037  | 375064 | 1.06  | 0.055189 | 0.079161 | 0.905    | 1.23     | 0.485699 | 0.826397 |
| Genitourinary              | Other disorders of breast (HES)                                  | T | 378957 | 1110  | 377991 | 0.894 | -0.11185 | 0.161484 | 0.652    | 1.23     | 0.488521 | 0.828147 |
| Operations and Procedures  | Oesophageal surgery (self-reported)                              | T | 378957 | 447   | 378654 | 0.833 | -0.18216 | 0.262897 | 0.498    | 1.4      | 0.488374 | 0.828147 |
| Operations and Procedures  | Transluminal operations on pulmonary artery                      | T | 378957 | 411   | 378690 | 0.823 | -0.1953  | 0.282177 | 0.473    | 1.43     | 0.488854 | 0.828147 |
| Musculoskeletal            | Fibromyalgia (HES and self-reported)                             | T | 378957 | 1223  | 377878 | 1.1   | 0.096563 | 0.139622 | 0.838    | 1.45     | 0.489188 | 0.828147 |
| Immuno-inflammation        | Psoriasis (HES)                                                  | T | 378957 | 2058  | 377043 | 1.08  | 0.075968 | 0.109932 | 0.87     | 1.34     | 0.489534 | 0.828151 |
| Symptoms                   | Pain (HES)                                                       | T | 378957 | 1292  | 377809 | 1.1   | 0.094147 | 0.136935 | 0.84     | 1.44     | 0.491751 | 0.831269 |
| Medication                 | Corticosteroids and anti-infectives in combination 1             | T | 378957 | 5806  | 373295 | 1.05  | 0.045609 | 0.066386 | 0.919    | 1.19     | 0.492067 | 0.831269 |
| Summary                    | Abn exm of fluids subst wo diag (HES)                            | T | 378957 | 1857  | 377244 | 1.08  | 0.078708 | 0.11475  | 0.864    | 1.35     | 0.492771 | 0.831292 |
| Neurosciences              | Posttraumatic stress disorder (HES and self-reported)            | T | 378957 | 723   | 378378 | 0.869 | -0.13988 | 0.203813 | 0.583    | 1.3      | 0.492522 | 0.831292 |
| Operations and Procedures  | Intubation of stomach                                            | T | 378957 | 329   | 378772 | 1.2   | 0.180853 | 0.264576 | 0.713    | 2.01     | 0.494255 | 0.833212 |
| Summary                    | Glucose regulation and pancreatic internal secretion (HES)       | T | 378957 | 831   | 378270 | 0.879 | -0.12921 | 0.189302 | 0.606    | 1.27     | 0.494898 | 0.833713 |
| Operations and Procedures  | Other operations on spermatic cord                               | T | 378957 | 598   | 378503 | 1.14  | 0.134617 | 0.197493 | 0.777    | 1.68     | 0.495474 | 0.8341   |
| Immuno-inflammation        | Urticaria (HES and self-reported)                                | T | 378957 | 530   | 378571 | 1.15  | 0.141841 | 0.209163 | 0.765    | 1.74     | 0.497684 | 0.837235 |
| ENT                        | Adenoid surgery adenoidectomy (self-reported)                    | T | 378957 | 2205  | 376896 | 1.07  | 0.070802 | 0.104761 | 0.874    | 1.32     | 0.499142 | 0.839102 |
| Operations and Procedures  | Extirpation of lesion of upper gastrointestinal tract            | T | 378957 | 1015  | 378086 | 1.11  | 0.104234 | 0.154509 | 0.82     | 1.5      | 0.499923 | 0.839829 |
| Operations and Procedures  | Therapeutic endoscopic operations on other joint structure       | T | 378957 | 4753  | 374348 | 1.05  | 0.049    | 0.07294  | 0.91     | 1.21     | 0.501718 | 0.842257 |
| Musculoskeletal            | Trunk BMD bone mineral density                                   | T | 4100   | NA    | NA     | NA    | -0.05782 | 0.086229 | -0.22683 | 0.111192 | 0.502538 | 0.843046 |
| Metabolic                  | Other disorders of pancreatic internal secretion (HES)           | T | 378957 | 829   | 378772 | 1.08  | -0.12678 | 0.18931  | 0.608    | 1.28     | 0.503066 | 0.843344 |
| Medication                 | Intestinal anti-infectives                                       | T | 378957 | 693   | 378408 | 0.87  | -0.13916 | 0.208001 | 0.579    | 1.31     | 0.503466 | 0.843428 |
| Eye                        | Retinal vascular occlusions (HES)                                | T | 378957 | 466   | 378635 | 0.845 | -0.16877 | 0.254716 | 0.513    | 1.39     | 0.507603 | 0.843952 |
| Digestive system           | Diseases of salivary glands (HES)                                | T | 378957 | 909   | 378192 | 0.887 | -0.11989 | 0.180231 | 0.623    | 1.26     | 0.505912 | 0.843952 |
| Operations and Procedures  | Hernia surgery (self-reported)                                   | T | 378957 | 2430  | 376671 | 1.07  | 0.066738 | 0.100815 | 0.877    | 1.3      | 0.507983 | 0.843952 |
| Operations and Procedures  | Other operations on ear                                          | T | 378957 | 414   | 378687 | 1.17  | 0.155914 | 0.235109 | 0.737    | 1.85     | 0.507229 | 0.843952 |
| Operations and Procedures  | Division of fascia                                               | T | 378957 | 394   | 378707 | 0.829 | -0.18805 | 0.28233  | 0.476    | 1.44     | 0.505381 | 0.843952 |
| Haematology                | Pernicious anaemia (HES and self-reported)                       | T | 378957 | 1499  | 377602 | 1.09  | 0.084974 | 0.128158 | 0.847    | 1.4      | 0.507304 | 0.843952 |
| Digestive system           | Ulcerative colitis (HES and self-reported)                       | T | 378957 | 3555  | 375546 | 0.943 | -0.05881 | 0.088811 | 0.792    | 1.12     | 0.507861 | 0.843952 |
| Cardiovascular             | Wolff parkinson white wppv syndrome (HES and self-reported)      | T | 378957 | 228   | 378873 | 1.23  | 0.205475 | 0.309292 | 0.67     | 2.25     | 0.506472 | 0.843952 |
| Cardiovascular             | Svt supraventricular tachycardia (HES and self-reported)         | T | 378957 | 2281  | 376820 | 0.929 | -0.07356 | 0.110926 | 0.748    | 1.15     | 0.507226 | 0.843952 |
| Musculoskeletal            | Fracture wrist colles fracture (HES and self-reported)           | T | 378957 | 3198  | 375903 | 0.94  | -0.06223 | 0.09385  | 0.782    | 1.13     | 0.507285 | 0.843952 |
| Family history             | High blood pressure (family history)                             | T | 378957 | NA    | NA     | NA    | 0.005533 | 0.008305 | -0.01075 | 0.021811 | 0.505304 | 0.843952 |
| Biological assays          | Microalbumin in urine                                            | T | 114244 | NA    | NA     | NA    | 0.009892 | 0.014859 | -0.01923 | 0.039016 | 0.505607 | 0.843952 |
| Summary                    | Mal neo of lip oral cavity and pharynx (cancer register)         | T | 378957 | 799   | 378302 | 0.881 | -0.12642 | 0.192659 | 0.604    | 1.29     | 0.511697 | 0.849061 |
| Operations and Procedures  | Diagnostic lower respiratory tract                               | T | 378957 | 4809  | 374292 | 0.951 | -0.05012 | 0.076393 | 0.819    | 1.11     | 0.511763 | 0.849061 |
| Operations and Procedures  | Diagnostic imaging of musculoskeletal system                     | T | 378957 | 820   | 378281 | 0.883 | -0.1241  | 0.189319 | 0.609    | 1.28     | 0.512126 | 0.849135 |
| Operations and Procedures  | Other non operations                                             | T | 378957 | 2978  | 376123 | 0.936 | -0.06639 | 0.10142  | 0.767    | 1.14     | 0.512737 | 0.849507 |
| Medication                 | Cicatrizants                                                     | T | 378957 | 2968  | 376133 | 0.938 | -0.06406 | 0.098027 | 0.774    | 1.14     | 0.513441 | 0.849536 |
| Genitourinary              | Female infertility (HES)                                         | T | 378957 | 923   | 378178 | 1.11  | 0.105418 | 0.161745 | 0.809    | 1.53     | 0.514559 | 0.849536 |
| Medication                 | Anti-inflammatory agents and anti-infectives in combination      | T | 378957 | 17347 | 361754 | 0.974 | -0.02627 | 0.040030 | 0.9      | 1.05     | 0.514527 | 0.849536 |
| Family history             | Lung cancer (family history - sibling)                           | T | 301109 | 6394  | 294842 | 0.958 | -0.04337 | 0.066525 | 0.841    | 1.09     | 0.514454 | 0.849536 |
| Operations and Procedures  | Other excision of bone                                           | T | 378957 | 3701  | 375400 | 0.945 | -0.05641 | 0.08662  | 0.798    | 1.12     | 0.51487  | 0.849536 |
| ENT                        | Sleep apnoea (HES and self-reported)                             | T | 378957 | 4559  | 374542 | 0.95  | -0.05105 | 0.078342 | 0.815    | 1.11     | 0.51467  | 0.849536 |
| Summary                    | Chronic lower respiratory diseases (HES)                         | T | 378957 | 30351 | 348750 | 1.02  | 0.01984  | 0.030514 | 0.961    | 1.08     | 0.515577 | 0.85012  |
| Eye                        | Other disorders of lens (HES)                                    | T | 378957 | 203   | 378898 | 1.23  | 0.210632 | 0.324557 | 0.653    | 2.33     | 0.516349 | 0.850229 |
| Operations and Procedures  | Primary repair of umbilical hernia                               | T | 378957 | 3099  | 376002 | 0.94  | -0.06178 | 0.095174 | 0.78     | 1.13     | 0.51624  | 0.850229 |
| Infectious disease         | Dermatophytosis (HES)                                            | T | 378957 | 227   | 378874 | 1.22  | 0.200454 | 0.309394 | 0.666    | 2.24     | 0.517055 | 0.850229 |
| Symptoms                   | General sensations and perceptions (HES)                         | T | 378957 | 472   | 378629 | 0.848 | -0.16503 | 0.254537 | 0.515    | 1.4      | 0.516754 | 0.850229 |
| Immuno-inflammation        | Decubitus ulcer (HES)                                            | T | 378957 | 840   | 378261 | 0.887 | -0.12045 | 0.186262 | 0.615    | 1.28     | 0.517855 | 0.850362 |
| Operations and Procedures  | Other operations on lip                                          | T | 378957 | 464   | 378637 | 1.16  | 0.144246 | 0.22357  | 0.745    | 1.79     | 0.518802 | 0.850362 |
| Operations and Procedures  | Harvest of tendon                                                | T | 378957 | 532   | 378569 | 0.856 | -0.15523 | 0.240012 | 0.535    | 1.37     | 0.517777 | 0.850362 |
| Eye                        | Diabetes related eye disease                                     | T | 124323 | 2369  | 122007 | 0.932 | -0.06989 | 0.108173 | 0.754    | 1.15     | 0.518241 | 0.850362 |
| Cardiovascular             | Pericardial effusion (HES and self-reported)                     | T | 378957 | 600   | 378501 | 0.866 | -0.14345 | 0.223944 | 0.56     | 1.34     | 0.518901 | 0.850362 |
| Mental health              | Phobic anxiety disorders (HES)                                   | T | 378957 | 527   | 378574 | 1.14  | 0.134661 | 0.209198 | 0.759    | 1.72     | 0.519767 | 0.850624 |
| Operations and Procedures  | Removal of rodent ulcer basal cell carcinoma bcc (self-reported) | T | 378957 | 957   | 378144 | 1.11  | 0.10071  | 0.156404 | 0.814    | 1.5      | 0.519635 | 0.850624 |
| Summary                    | Glomerular diseases (HES)                                        | T | 378957 | 1942  | 377159 | 1.07  | 0.07227  | 0.112618 | 0.862    | 1.34     | 0.521048 | 0.851564 |
| Cancer                     | Mal neo testis (cancer register)                                 | T | 378957 | 451   | 378650 | 1.16  | 0.147163 | 0.229264 | 0.739    | 1.82     | 0.520944 | 0.851564 |
| Summary                    | Other joint disorders (HES)                                      | T | 378957 | 35549 | 343552 | 0.982 | -0.01823 | 0.028742 | 0.928    | 1.04     | 0.525907 | 0.852572 |
| Respiratory                | Other interstitial pulmonary diseases (HES)                      | T | 378957 | 930   | 378171 | 1.11  | 0.102407 | 0.160138 | 0.809    | 1.52     | 0.522504 | 0.852572 |
| Genitourinary              | Unspecified renal failure (HES)                                  | T | 378957 | 1276  | 377825 | 1.09  | 0.087916 | 0.138274 | 0.833    | 1.43     | 0.5249   | 0.852572 |
| Symptoms                   | Fever of unknown origin (HES)                                    | T | 378957 | 3729  | 375372 | 1.05  | 0.052462 | 0.082269 | 0.897    | 1.24     | 0.523679 | 0.852572 |
| Medication                 | Muscle relaxants centrally acting agents                         | T | 378957 | 555   | 378546 | 0.861 | -0.14933 | 0.233659 | 0.545    | 1.36     | 0.522771 | 0.852572 |
| Operations and Procedures  | Excision of thyroid gland                                        | T | 378957 | 1898  | 377203 | 0.925 | -0.07743 | 0.122202 | 0.728    | 1.18     | 0.526336 | 0.852572 |
| Operations and Procedures  | Endoscopic extirpation of lesion of bladder                      | T | 378957 | 2389  | 376712 | 0.934 | -0.06847 | 0.108103 | 0.756    | 1.15     | 0.526504 | 0.852572 |
| Operations and Procedures  | Operations on prepuc                                             | T | 378957 | 2323  | 376778 | 1.07  | 0.066529 | 0.105032 | 0.87     | 1.31     | 0.52646  | 0.852572 |
| Operations and Procedures  | Split autograft of skin                                          | T | 378957 | 1318  | 377783 | 1.09  | 0.086765 | 0.135772 | 0.836    | 1.42     | 0.522791 | 0.852572 |
| Operations and Procedures  | Suture of skin of other site                                     | T | 378957 | 2266  | 376835 | 1.07  | 0.066928 | 0.105229 | 0.87     | 1.31     | 0.524761 | 0.852572 |
| Operations and Procedures  | Total prosthetic replacement of other joint not using cement     | T | 378957 | 305   | 378796 | 0.816 | -0.20374 | 0.321781 | 0.434    | 1.53     | 0.52662  | 0.852572 |
| Operations and Procedures  | High cost immunology drugs                                       | T | 378957 | 340   | 378761 | 1.18  | 0.163291 | 0.256372 | 0.712    | 1.95     | 0.524171 | 0.852572 |
| Gynaecology and Obstetrics | Breast disease not cancer (HES and self-reported)                | T | 378957 | 3704  | 375397 | 0.946 | -0.05501 | 0.086858 | 0.798    | 1.12     | 0.526508 | 0.852572 |
| Musculoskeletal            | Fracture lower leg ankle (HES and self-reported)                 | T | 378957 | 6609  | 372492 | 1.04  | 0.039757 | 0.062411 | 0.921    | 1.18     | 0.524113 | 0.852572 |
| Respiratory                | Pulmonary fibrosis (HES and self-reported)                       | T | 378957 | 789   | 378312 | 0.885 | -0.12164 | 0.192801 | 0.607    | 1.29     | 0.528093 | 0.854383 |
| Operations and Procedures  | Neurophysiological                                               |   |        |       |        |       |          |          |          |          |          |          |

|                            |                                                                         |   |        |        |          |       |          |          |          |          |          |          |
|----------------------------|-------------------------------------------------------------------------|---|--------|--------|----------|-------|----------|----------|----------|----------|----------|----------|
| Neurosciences              | Other mononeuropathies (HES)                                            | T | 378957 | 306    | 378795   | 0.823 | -0.1951  | 0.321731 | 0.438    | 1.55     | 0.544248 | 0.863129 |
| Operations and Procedures  | Other operations on anus                                                | T | 378957 | 1643   | 374558   | 0.923 | -0.07981 | 0.131829 | 0.713    | 1.2      | 0.544886 | 0.863573 |
| Cardiovascular             | Other cerebrovascular diseases (HES)                                    | T | 378957 | 2188   | 376913   | 0.934 | -0.06815 | 0.113049 | 0.748    | 1.17     | 0.546599 | 0.865182 |
| Genitourinary              | Other noninflammatory disorders of cervix uteri (HES)                   | T | 378957 | 1621   | 374780   | 1.08  | 0.073968 | 0.122791 | 0.846    | 1.37     | 0.546912 | 0.865182 |
| Family history             | Severe depression (family history)                                      | T | 378957 | NA     | NA       | NA    | 0.004998 | 0.008298 | -0.01127 | 0.021261 | 0.546979 | 0.865182 |
| Operations and Procedures  | Foot surgery (self-reported)                                            | T | 378957 | 7430   | 371671   | 1.04  | 0.035423 | 0.058938 | 0.923    | 1.16     | 0.547828 | 0.865956 |
| Operations and Procedures  | Bladder surgery (self-reported)                                         | T | 378957 | 2401   | 376700   | 1.06  | 0.060961 | 0.10164  | 0.871    | 1.3      | 0.548659 | 0.866432 |
| Neurosciences              | Diabetic neuropathylculers (HES and self-reported)                      | T | 378957 | 546    | 378555   | 0.869 | -0.14016 | 0.233803 | 0.55     | 1.37     | 0.548848 | 0.866432 |
| Operations and Procedures  | Photocoagulation of retina for detachment                               | T | 378957 | 972    | 378129   | 0.902 | -0.10327 | 0.17247  | 0.643    | 1.26     | 0.549319 | 0.866607 |
| Symptoms                   | Polyuria (HES)                                                          | T | 378957 | 3507   | 375594   | 1.05  | 0.050829 | 0.085049 | 0.891    | 1.24     | 0.550074 | 0.866693 |
| Symptoms                   | Dizziness and giddiness (HES)                                           | T | 378957 | 4147   | 374954   | 1.05  | 0.046967 | 0.078619 | 0.898    | 1.22     | 0.550243 | 0.866693 |
| Operations and Procedures  | Extirpation of lesion of other part of mouth                            | T | 378957 | 688    | 378413   | 0.883 | -0.124   | 0.208024 | 0.588    | 1.33     | 0.551111 | 0.867728 |
| Musculoskeletal            | Total BMD bone mineral density                                          | T | 4100   | NA     | NA       | NA    | -0.05126 | 0.086307 | -0.22042 | 0.117905 | 0.552587 | 0.869485 |
| Operations and Procedures  | Operations on other articular cartilage                                 | T | 378957 | 1114   | 377987   | 1.09  | 0.087564 | 0.147856 | 0.817    | 1.46     | 0.553698 | 0.870111 |
| Operations and Procedures  | Connection of organ NOC                                                 | T | 378957 | 354    | 378747   | 0.84  | -0.17407 | 0.293928 | 0.472    | 1.49     | 0.553707 | 0.870111 |
| Family history             | Lung cancer (family history - mother)                                   | T | 354043 | 14282  | 339899   | 1.03  | 0.02569  | 0.043486 | 0.942    | 1.12     | 0.554682 | 0.871075 |
| Metabolic                  | Thyroiditis (HES)                                                       | T | 378957 | 275    | 378826   | 1.18  | 0.167257 | 0.284452 | 0.677    | 2.06     | 0.556533 | 0.872844 |
| Symptoms                   | Unspecified jaundice (HES)                                              | T | 378957 | 839    | 378262   | 0.896 | -0.10952 | 0.186212 | 0.622    | 1.29     | 0.55643  | 0.872844 |
| Metabolic                  | Volume depletion (HES)                                                  | T | 378957 | 2592   | 376509   | 1.06  | 0.057628 | 0.098346 | 0.874    | 1.28     | 0.557896 | 0.874412 |
| Infectious disease         | Other bacterial intestinal infections (HES)                             | T | 378957 | 2315   | 376786   | 1.06  | 0.061103 | 0.104668 | 0.866    | 1.31     | 0.559372 | 0.875586 |
| Operations and Procedures  | Skin operation or plastic surgery (self-reported)                       | T | 378957 | 3215   | 375886   | 1.05  | 0.051809 | 0.088675 | 0.885    | 1.25     | 0.559501 | 0.875586 |
| Operations and Procedures  | Other operations on joint                                               | T | 378957 | 520    | 378581   | 0.869 | -0.14003 | 0.2401   | 0.543    | 1.39     | 0.559764 | 0.875631 |
| Summary                    | Diseases of oral cavity salivary glands and jaws (HES)                  | T | 378957 | 14224  | 364877   | 0.974 | -0.02583 | 0.044374 | 0.893    | 1.06     | 0.560486 | 0.876191 |
| Mental health              | Unspecified dementia (HES)                                              | T | 378957 | 432    | 378669   | 1.14  | 0.133366 | 0.229427 | 0.729    | 1.79     | 0.561038 | 0.876485 |
| Medication                 | Antiinflammatory and antirheumatic products non steroids                | T | 378957 | 86308  | 292793   | 0.988 | -0.01158 | 0.019967 | 0.951    | 1.03     | 0.561957 | 0.877352 |
| Mental health              | Probable Recurrent major depression severe 1                            | T | 91467  | 6715   | 84800    | 1.04  | 0.036918 | 0.063724 | 0.916    | 1.18     | 0.562359 | 0.877411 |
| Operations and Procedures  | Removal of benign skin lesion (self-reported)                           | T | 378957 | 629    | 378472   | 1.12  | 0.111884 | 0.193592 | 0.765    | 1.63     | 0.563308 | 0.877755 |
| Operations and Procedures  | Ventilation support                                                     | T | 378957 | 2964   | 376137   | 0.945 | -0.05627 | 0.097282 | 0.781    | 1.14     | 0.562962 | 0.877755 |
| Operations and Procedures  | Other operations on skin                                                | T | 378957 | 1061   | 378040   | 0.909 | -0.09556 | 0.165531 | 0.657    | 1.26     | 0.563748 | 0.877833 |
| Operations and Procedures  | Graft to organ NOC                                                      | T | 378957 | 624    | 378477   | 0.882 | -0.12522 | 0.21729  | 0.576    | 1.35     | 0.564424 | 0.878358 |
| Medication                 | Anti dementia drugs                                                     | T | 378957 | 2265   | 376836   | 0.938 | -0.06369 | 0.11102  | 0.755    | 1.17     | 0.566184 | 0.87996  |
| Cancer                     | Chronic lymphocytic (self-reported)                                     | T | 378957 | 244    | 378857   | 0.813 | -0.20645 | 0.359746 | 0.402    | 1.65     | 0.566052 | 0.87996  |
| Summary                    | Other viral diseases (HES)                                              | T | 378957 | 1781   | 377320   | 1.07  | 0.067407 | 0.118325 | 0.848    | 1.35     | 0.568898 | 0.880272 |
| Summary                    | Diseases of external ear (HES)                                          | T | 378957 | 1324   | 377777   | 1.08  | 0.076112 | 0.13572  | 0.827    | 1.41     | 0.574933 | 0.880272 |
| Summary                    | Lung diseases due to external agents (HES)                              | T | 378957 | 898    | 378203   | 1.1   | 0.092687 | 0.164176 | 0.795    | 1.51     | 0.572373 | 0.880272 |
| Summary                    | HESCH Diseases of the blood forming organ immune mech BIN (HES)         | T | 378957 | 22345  | 356756   | 0.92  | -0.02005 | 0.035664 | 0.914    | 1.05     | 0.574039 | 0.880272 |
| Eye                        | Disorders of vitreous body (HES)                                        | T | 378957 | 1246   | 378555   | 1.08  | 0.077935 | 0.138324 | 0.824    | 1.42     | 0.573147 | 0.880272 |
| Digestive system           | Dentofacial anomalies (HES)                                             | T | 378957 | 538    | 378563   | 1.13  | 0.118075 | 0.209111 | 0.747    | 1.7      | 0.572312 | 0.880272 |
| Digestive system           | Abscess of anal and rectal regions (HES)                                | T | 378957 | 1208   | 377893   | 1.09  | 0.081783 | 0.143444 | 0.819    | 1.44     | 0.568583 | 0.880272 |
| Genitourinary              | Other noninflammatory disorders of uterus except cervix (HES)           | T | 378957 | 4717   | 374384   | 0.958 | -0.04273 | 0.076311 | 0.825    | 1.11     | 0.57552  | 0.880272 |
| Gynaecology and Obstetrics | Single delivery by caesarean section (HES)                              | T | 378957 | 504    | 378597   | 0.871 | -0.13824 | 0.241675 | 0.542    | 1.4      | 0.567314 | 0.880272 |
| Symptoms                   | Faecal incontinence (HES)                                               | T | 378957 | 1634   | 374667   | 1.07  | 0.069634 | 0.12342  | 0.842    | 1.37     | 0.572615 | 0.880272 |
| Symptoms                   | Abnormalities of gait and mobility (HES)                                | T | 378957 | 1676   | 374725   | 0.93  | -0.07274 | 0.129793 | 0.721    | 1.2      | 0.5752   | 0.880272 |
| Symptoms                   | Other lack of coordination (HES)                                        | T | 378957 | 322    | 378779   | 1.16  | 0.150161 | 0.264679 | 0.692    | 1.95     | 0.570487 | 0.880272 |
| Medication                 | Hypnotics and sedatives                                                 | T | 378957 | 3007   | 376094   | 1.05  | 0.052088 | 0.091497 | 0.881    | 1.26     | 0.569159 | 0.880272 |
| Operations and Procedures  | Spine or back surgery (self-reported)                                   | T | 378957 | 4637   | 374464   | 1.04  | 0.041843 | 0.074042 | 0.902    | 1.21     | 0.571986 | 0.880272 |
| Family history             | Bowel cancer (family history - mother)                                  | T | 354043 | 17920  | 336261   | 0.978 | -0.02226 | 0.039607 | 0.905    | 1.06     | 0.574182 | 0.880272 |
| Gynaecology and Obstetrics | Ever had hysterectomy womb removed                                      | T | 180479 | 14618  | 165925   | 0.975 | -0.02546 | 0.04535  | 0.892    | 1.07     | 0.574516 | 0.880272 |
| Operations and Procedures  | Other operations on maxillary antrum                                    | T | 378957 | 2872   | 376229   | 0.946 | -0.05557 | 0.098927 | 0.779    | 1.15     | 0.574303 | 0.880272 |
| Operations and Procedures  | Removal of other substance from skin                                    | T | 378957 | 434    | 378667   | 0.862 | -0.14802 | 0.262962 | 0.515    | 1.44     | 0.573504 | 0.880272 |
| Operations and Procedures  | Diagnostic blood tests                                                  | T | 378957 | 378    | 378723   | 1.15  | 0.14205  | 0.248448 | 0.708    | 1.88     | 0.567491 | 0.880272 |
| Operations and Procedures  | Release of contracture of joint                                         | T | 378957 | 1613   | 374888   | 1.07  | 0.069683 | 0.123387 | 0.842    | 1.37     | 0.572242 | 0.880272 |
| Operations and Procedures  | Excision of lesion of organ NOC                                         | T | 378957 | 2108   | 376993   | 1.06  | 0.061904 | 0.109278 | 0.859    | 1.32     | 0.571065 | 0.880272 |
| Cardiovascular             | Hypertension (HES and self-reported)                                    | T | 378957 | 98025  | 281076   | 0.989 | -0.01107 | 0.019599 | 0.952    | 1.03     | 0.572307 | 0.880272 |
| Cardiovascular             | Pulse wave Arterial Stiffness index                                     | T | 124901 | NA     | NA       | NA    | 0.008098 | 0.014377 | -0.02008 | 0.036277 | 0.573228 | 0.880272 |
| Cardiovascular             | LV end systolic volume                                                  | T | 3764   | NA     | NA       | NA    | 0.050852 | 0.089794 | -0.12514 | 0.226847 | 0.571178 | 0.880272 |
| Cardiovascular             | LVEDVi                                                                  | T | 3760   | NA     | NA       | NA    | 0.051063 | 0.089766 | -0.12488 | 0.227005 | 0.569462 | 0.880272 |
| Other                      | Chest pain or discomfort                                                | T | 375050 | 59237  | 315955   | 0.987 | -0.0129  | 0.02311  | 0.943    | 1.03     | 0.576766 | 0.881575 |
| Neurosciences              | Other neurological problem (HES and self-reported)                      | T | 378957 | 8378   | 370723   | 1.03  | 0.031123 | 0.055814 | 0.925    | 1.15     | 0.577104 | 0.881575 |
| Cancer                     | Non hodgkins lymphoma (self-reported)                                   | T | 378957 | 719    | 378382   | 0.895 | -0.1113  | 0.200023 | 0.605    | 1.32     | 0.577902 | 0.882149 |
| Operations and Procedures  | General anaesthetic                                                     | T | 378957 | 13536  | 365565   | 0.975 | -0.02522 | 0.045365 | 0.892    | 1.07     | 0.578212 | 0.882149 |
| Summary                    | Viral infections of the central nervous system (HES)                    | T | 378957 | 233    | 378868   | 1.19  | 0.17129  | 0.309131 | 0.648    | 2.18     | 0.579509 | 0.882237 |
| Cancer                     | Large bowel cancer colorectal cancer (self-reported)                    | T | 378957 | 526    | 378575   | 1.12  | 0.116102 | 0.209321 | 0.745    | 1.69     | 0.579129 | 0.882237 |
| Cancer                     | Hodgkins lymphoma hodgkins disease (self-reported)                      | T | 378957 | 352    | 378749   | 1.15  | 0.141839 | 0.256132 | 0.698    | 1.9      | 0.579735 | 0.882237 |
| Operations and Procedures  | Other manipulation of joint                                             | T | 378957 | 2050   | 377051   | 1.06  | 0.060977 | 0.109957 | 0.857    | 1.32     | 0.579199 | 0.882237 |
| Operations and Procedures  | Open approach to contents of cranium                                    | T | 378957 | 800    | 378301   | 0.901 | -0.10452 | 0.189405 | 0.621    | 1.31     | 0.581048 | 0.883677 |
| Symptoms                   | Symptoms the circulatory and respiratory systems (HES)                  | T | 378957 | 1000   | 378101   | 1.09  | 0.085932 | 0.156181 | 0.802    | 1.48     | 0.582177 | 0.884662 |
| Other                      | Chest pain or discomfort walking normally                               | T | 58703  | 10166  | 48566    | 1.03  | 0.030971 | 0.056363 | 0.924    | 1.15     | 0.582664 | 0.884662 |
| Operations and Procedures  | Perineal operations for prolapse of rectum                              | T | 378957 | 257    | 378844   | 1.18  | 0.162551 | 0.295921 | 0.659    | 2.1      | 0.582797 | 0.884662 |
| Gynaecology and Obstetrics | Lumpectomy (self-reported)                                              | T | 378957 | 12746  | 366355   | 0.975 | -0.02581 | 0.047117 | 0.889    | 1.07     | 0.583811 | 0.884778 |
| Operations and Procedures  | Dupuytren's contracture surgery (self-reported)                         | T | 378957 | 409    | 378692   | 1.14  | 0.128882 | 0.235371 | 0.717    | 1.8      | 0.583987 | 0.884778 |
| Operations and Procedures  | Diagnostic endoscopic examination of fallopian tube                     | T | 378957 | 293    | 378808   | 1.17  | 0.155814 | 0.284799 | 0.669    | 2.04     | 0.584309 | 0.884778 |
| Operations and Procedures  | Approach to organ through artery                                        | T | 378957 | 284    | 378817   | 0.838 | -0.17637 | 0.322406 | 0.446    | 1.58     | 0.584343 | 0.884778 |
| Immuno-inflammation        | Other disorders involving the immune mechanism (HES)                    | T | 378957 | 290    | 378811   | 0.84  | -0.17424 | 0.322058 | 0.447    | 1.58     | 0.588491 | 0.886922 |
| Gynaecology and Obstetrics | Maternal care for known or suspected abnormality of pelvic organs (HES) | T | 378957 | 1384   | 377717   | 1.08  | 0.072463 | 0.134012 | 0.827    | 1.4      | 0.588699 | 0.886922 |
| Cardiovascular             | Aortic valve repair replacement (self-reported)                         | T | 378957 | 561    | 378540   | 0.884 | -0.1233  | 0.228031 | 0.565    | 1.38     | 0.588704 | 0.886922 |
| Operations and Procedures  | Secondary open reduction of fracture of bone                            | T | 378957 | 1013   | 378088   | 0.913 | -0.09105 | 0.167779 | 0.657    | 1.27     | 0.587364 | 0.886922 |
| Metabolic                  | Adrenocortical insufficiencyadison's disease (HES and self-reported)    | T | 378957 | 349    | 378752   | 0.853 | -0.15936 | 0.293983 | 0.479    | 1.52     | 0.587759 | 0.886922 |
| Musculoskeletal            | Ankylosing spondylitis (HES and self-reported)                          | T | 378957 | 1308   | 377793   | 0.923 | -0.07983 | 0.147362 | 0.692    | 1.23     | 0.588014 | 0.886922 |
| Digestive system           | Appendicitis (HES and self-reported)                                    | T | 378957 | 6308   | 372793   | 1.04  | 0.034785 | 0.063924 | 0.913    | 1.17     | 0.586331 | 0.886922 |
| Eye                        | Corneal hysteresis left                                                 | T | 81021  | NA     | NA       | NA    | 0.009649 | 0.01777  | -0.02518 | 0.044478 | 0.587141 | 0.886922 |
| Metabolic                  | Other disorders of adrenal gland (HES)                                  | T | 378957 | 431    | 378670   | 0.869 | -0.14065 | 0.262991 | 0.519    | 1.45     | 0.592795 | 0.887535 |
| Neurosciences              | Mononeuropathies of lower limb (HES)                                    | T | 378957 | 1479   | 377622   | 1.07  | 0.069095 | 0.129166 | 0.832    | 1.38     | 0.592697 | 0.887535 |
| Medication                 | Corticosteroids                                                         | T | 378957 | 6270   | 372831   | 1.04  | 0.034541 | 0.064192 | 0.913    | 1.17     | 0.590519 | 0.887535 |
| Cancer                     | Kidney renal cell cancer (self-reported)                                | T | 378957 | 493    | 378608   | 1.12  | 0.117163 | 0.218426 | 0.733    | 1.73     | 0.591684 | 0.887535 |
| Operations and Procedures  | Lymph node surgery (self-reported)                                      | T | 378957 | 763    | 378338   | 1.1   | 0.094261 | 0.175792 | 0.779    | 1.55     | 0.591817 | 0.887535 |
| Family history             | High blood pressure (family history - mother)                           | T | 357389 | 106967 | 250562   | 1.01  | 0.010064 | 0.018802 | 0.974    | 1.05     | 0.592476 | 0.887535 |
| Operations and Procedures  | Reconstruction of ossicular chain                                       | T | 378957 | 220    | 378881</ |       |          |          |          |          |          |          |

|                            |                                                                   |   |        |       |        |       |          |          |          |          |          |          |
|----------------------------|-------------------------------------------------------------------|---|--------|-------|--------|-------|----------|----------|----------|----------|----------|----------|
| Cardiovascular             | Rheumatic fever (HES and self-reported)                           | T | 378957 | 3026  | 376075 | 1.05  | 0.046865 | 0.09125  | 0.876    | 1.25     | 0.607536 | 0.895024 |
| Symptoms                   | Abnormal findings on diagnostic imaging of lung (HES)             | T | 378957 | 2263  | 376838 | 1.06  | 0.05397  | 0.105854 | 0.858    | 1.3      | 0.610155 | 0.897901 |
| Summary                    | Number of operations self reported                                | T | 378956 | NA    | NA     | NA    | -0.00423 | 0.008316 | -0.02053 | 0.012067 | 0.610754 | 0.898233 |
| Infectious disease         | Viral warts (HES)                                                 | T | 378957 | 643   | 378458 | 1.1   | 0.098314 | 0.193486 | 0.755    | 1.61     | 0.61137  | 0.898591 |
| Eye                        | Other disorders of eye and adnexa (HES)                           | T | 378957 | 430   | 378671 | 0.875 | -0.13342 | 0.262998 | 0.523    | 1.47     | 0.611954 | 0.898901 |
| Cardiovascular             | Gestational hypertension/preeclampsia (HES and self-reported)     | T | 378957 | 2534  | 376567 | 1.05  | 0.050561 | 0.099892 | 0.865    | 1.28     | 0.612747 | 0.899517 |
| Metabolic                  | Thyroid problem not cancer (HES and self-reported)                | T | 378957 | 1330  | 377771 | 1.07  | 0.068487 | 0.13582  | 0.821    | 1.4      | 0.61409  | 0.900794 |
| Cardiovascular             | Ventricular rate                                                  | T | 8940   | NA    | NA     | NA    | -0.02873 | 0.057027 | -0.14051 | 0.08304  | 0.614365 | 0.900794 |
| Musculoskeletal            | Osteomyelitis (HES)                                               | T | 378957 | 486   | 378615 | 0.883 | -0.12428 | 0.247138 | 0.544    | 1.43     | 0.615061 | 0.9009   |
| Operations and Procedures  | Other endoscopic removal of calculus from ureter                  | T | 378957 | 242   | 378859 | 0.835 | -0.18085 | 0.359763 | 0.412    | 1.69     | 0.615185 | 0.9009   |
| Digestive system           | Peritonitis (HES)                                                 | T | 378957 | 722   | 378379 | 1.1   | 0.092248 | 0.18387  | 0.765    | 1.57     | 0.615875 | 0.901363 |
| Respiratory                | Bronchiectasis (HES)                                              | T | 378957 | 1708  | 377393 | 0.938 | -0.06396 | 0.127862 | 0.73     | 1.21     | 0.616922 | 0.902342 |
| Operations and Procedures  | Operations on septum of nose                                      | T | 378957 | 4412  | 374689 | 0.961 | -0.03992 | 0.079885 | 0.822    | 1.12     | 0.617293 | 0.902342 |
| ENT                        | Acute nasopharyngitis (HES)                                       | T | 378957 | 356   | 378745 | 1.14  | 0.127071 | 0.256052 | 0.687    | 1.88     | 0.619703 | 0.902578 |
| Cancer                     | Larynx throat cancer (self-reported)                              | T | 378957 | 289   | 378812 | 1.15  | 0.141319 | 0.284183 | 0.66     | 2.01     | 0.618991 | 0.902578 |
| Operations and Procedures  | Other operations on varicose vein of leg                          | T | 378957 | 6971  | 372130 | 1.03  | 0.030515 | 0.06148  | 0.914    | 1.16     | 0.619655 | 0.902578 |
| Operations and Procedures  | Subcutaneous injection                                            | T | 378957 | 2578  | 376523 | 1.05  | 0.049001 | 0.098724 | 0.865    | 1.27     | 0.619655 | 0.902578 |
| Immuno-inflammation        | Allergy or anaphylactic reaction to drug (HES and self-reported)  | T | 378957 | 4200  | 374901 | 1.04  | 0.038755 | 0.077942 | 0.892    | 1.21     | 0.619028 | 0.902578 |
| Immuno-inflammation        | Rosacea (HES and self-reported)                                   | T | 378957 | 850   | 378251 | 0.913 | -0.09132 | 0.183223 | 0.637    | 1.31     | 0.618207 | 0.902578 |
| Operations and Procedures  | Other operations on amniotic cavity                               | T | 378957 | 308   | 378793 | 0.858 | -0.15262 | 0.308198 | 0.469    | 1.57     | 0.620462 | 0.903138 |
| Operations and Procedures  | Creation of artificial opening into ileum                         | T | 378957 | 1023  | 378078 | 1.08  | 0.076315 | 0.154439 | 0.797    | 1.46     | 0.621205 | 0.903568 |
| Operations and Procedures  | Instrumental correction of deformity of spine                     | T | 378957 | 342   | 378759 | 0.865 | -0.14489 | 0.294098 | 0.486    | 1.54     | 0.622258 | 0.903568 |
| Cardiovascular             | Primary hypertension I270                                         | T | 378957 | 416   | 378685 | 0.878 | -0.12985 | 0.263282 | 0.524    | 1.47     | 0.621884 | 0.903568 |
| Anthropometry              | VAT visceral adipose tissue mass                                  | T | 4051   | NA    | NA     | NA    | -0.04245 | 0.086141 | -0.21129 | 0.126385 | 0.622147 | 0.903568 |
| Symptoms                   | Elevated blood glucose level (HES)                                | T | 378957 | 625   | 378476 | 0.899 | -0.10592 | 0.217302 | 0.588    | 1.38     | 0.625959 | 0.904984 |
| Cancer                     | Mal neo kidney (cancer register)                                  | T | 378957 | 918   | 378183 | 0.918 | -0.08574 | 0.175108 | 0.651    | 1.29     | 0.624387 | 0.904984 |
| Operations and Procedures  | Operations on canthus                                             | T | 378957 | 1131  | 377970 | 1.07  | 0.072132 | 0.147842 | 0.804    | 1.44     | 0.625621 | 0.904984 |
| Operations and Procedures  | Excision of redundant skin of eyelid                              | T | 378957 | 1118  | 377983 | 1.07  | 0.072127 | 0.147914 | 0.804    | 1.44     | 0.625813 | 0.904984 |
| Operations and Procedures  | Other large intestine                                             | T | 378957 | 3469  | 375632 | 0.958 | -0.04339 | 0.088864 | 0.804    | 1.14     | 0.625379 | 0.904984 |
| Operations and Procedures  | Curettagge of uterus                                              | T | 378957 | 6842  | 372259 | 0.969 | -0.03153 | 0.064446 | 0.854    | 1.1      | 0.624656 | 0.904984 |
| Neurosciences              | Cranial nerve palsy (HES and self-reported)                       | T | 378957 | 1916  | 377185 | 1.06  | 0.055741 | 0.113909 | 0.846    | 1.32     | 0.624592 | 0.904984 |
| Cardiovascular             | Mean carotid intima medial thickness at 240 degrees               | T | 1843   | NA    | NA     | NA    | 0.061208 | 0.125737 | -0.18524 | 0.307653 | 0.626403 | 0.904984 |
| Biological assays          | Mean corpuscular haemoglobin                                      | T | 367719 | NA    | NA     | NA    | 0.004094 | 0.008416 | -0.0124  | 0.020589 | 0.626614 | 0.904984 |
| Symptoms                   | Symptoms and signs involving emotional state (HES)                | T | 378957 | 584   | 378517 | 1.1   | 0.099247 | 0.20468  | 0.739    | 1.65     | 0.627756 | 0.905173 |
| Operations and Procedures  | Other pericardial division of bone                                | T | 378957 | 263   | 378838 | 0.848 | -0.16461 | 0.339932 | 0.436    | 1.65     | 0.627668 | 0.905173 |
| Respiratory                | FEV1 FVC ratio ever smoked only                                   | T | 175212 | NA    | NA     | NA    | -0.00594 | 0.01226  | -0.02997 | 0.018086 | 0.627872 | 0.905173 |
| Operations and Procedures  | Other thoracic surgery (self-reported)                            | T | 378957 | 1195  | 377906 | 0.928 | -0.07437 | 0.15392  | 0.687    | 1.26     | 0.628974 | 0.906219 |
| Operations and Procedures  | Rectal or colon polypectomy (self-reported)                       | T | 378957 | 1567  | 377534 | 1.06  | 0.060805 | 0.126173 | 0.83     | 1.36     | 0.629862 | 0.906414 |
| Operations and Procedures  | Extirpation of lesion of palate                                   | T | 378957 | 297   | 378804 | 0.856 | -0.15524 | 0.321901 | 0.456    | 1.61     | 0.629631 | 0.906414 |
| Respiratory                | CopdMappingLoose primAndSec                                       | T | 244506 | 25872 | 218728 | 1.02  | 0.016771 | 0.034862 | 0.95     | 1.09     | 0.630458 | 0.90673  |
| Symptoms                   | Speech disturbances (HES)                                         | T | 378957 | 1366  | 377735 | 0.934 | -0.06856 | 0.143029 | 0.705    | 1.24     | 0.631676 | 0.90794  |
| Genitourinary              | Benign mammary dysplasia (HES)                                    | T | 378957 | 1624  | 374777 | 0.939 | -0.06265 | 0.131044 | 0.727    | 1.21     | 0.632578 | 0.908179 |
| Neurosciences              | Mean time to correctly identify matches                           | T | 376313 | NA    | NA     | NA    | 0.003984 | 0.008333 | -0.01235 | 0.020317 | 0.632596 | 0.908179 |
| Medication                 | Other drugs for obstructive airway diseases inhalants             | T | 378957 | 29711 | 349390 | 0.985 | -0.01483 | 0.03115  | 0.927    | 1.05     | 0.634119 | 0.909003 |
| Operations and Procedures  | Other autograft replacement of coronary artery                    | T | 378957 | 496   | 378605 | 0.892 | -0.11455 | 0.240587 | 0.556    | 1.43     | 0.633999 | 0.909003 |
| Operations and Procedures  | Preparation for external beam radiotherapy                        | T | 378957 | 655   | 378446 | 1.09  | 0.090491 | 0.190234 | 0.754    | 1.59     | 0.634302 | 0.909003 |
| Medication                 | Corticosteroids for systemic use plain                            | T | 378957 | 6943  | 372158 | 1.03  | 0.029059 | 0.061235 | 0.913    | 1.16     | 0.635107 | 0.909615 |
| Musculoskeletal            | Acquired deformities of fingers and toes (HES)                    | T | 378957 | 8762  | 370339 | 1.03  | 0.025882 | 0.054928 | 0.921    | 1.14     | 0.637501 | 0.910341 |
| Summary                    | In situ neo (cancer register)                                     | T | 378957 | 8358  | 370743 | 0.973 | -0.02707 | 0.057453 | 0.87     | 1.09     | 0.637503 | 0.910341 |
| Operations and Procedures  | Other operations on nose                                          | T | 378957 | 294   | 378807 | 0.859 | -0.15212 | 0.321957 | 0.457    | 1.61     | 0.636571 | 0.910341 |
| Operations and Procedures  | Harvest of random pattern flap of skin from limb                  | T | 378957 | 233   | 378868 | 0.844 | -0.16964 | 0.360023 | 0.417    | 1.71     | 0.637497 | 0.910341 |
| Medication                 | Vitamin B                                                         | T | 376892 | 15815 | 361221 | 0.98  | -0.01982 | 0.042051 | 0.903    | 1.06     | 0.637325 | 0.910341 |
| Genitourinary              | Glomerular disorders in diseases classified elsewhere (HES)       | T | 378957 | 293   | 378808 | 0.86  | -0.15098 | 0.321989 | 0.457    | 1.62     | 0.639149 | 0.910532 |
| Cancer                     | Carc in situ of skin (cancer register)                            | T | 378957 | 1157  | 377944 | 1.07  | 0.068721 | 0.146456 | 0.804    | 1.43     | 0.63891  | 0.910532 |
| Operations and Procedures  | Drainage of subdural space                                        | T | 378957 | 236   | 378865 | 0.845 | -0.16892 | 0.359986 | 0.417    | 1.71     | 0.638895 | 0.910532 |
| Digestive system           | Noninfective hepatitis (HES and self-reported)                    | T | 378957 | 1195  | 377906 | 1.07  | 0.068201 | 0.144777 | 0.806    | 1.42     | 0.638477 | 0.910532 |
| Cancer                     | Melanoma in situ (cancer register)                                | T | 378957 | 1026  | 378075 | 1.07  | 0.072263 | 0.154409 | 0.794    | 1.45     | 0.639787 | 0.910589 |
| Operations and Procedures  | Other graft of bone                                               | T | 378957 | 696   | 378405 | 1.09  | 0.087432 | 0.186911 | 0.757    | 1.57     | 0.639945 | 0.910589 |
| Summary                    | Other obstructive conditions not elsewhere classified (HES)       | T | 378957 | 1624  | 374777 | 0.94  | -0.06148 | 0.131618 | 0.727    | 1.22     | 0.640434 | 0.910747 |
| Summary                    | Other diseases of the digestive system (HES)                      | T | 378957 | 11473 | 367628 | 0.977 | -0.0228  | 0.049142 | 0.888    | 1.08     | 0.642657 | 0.912384 |
| Cardiovascular             | Cardiac arrest (HES)                                              | T | 378957 | 863   | 378238 | 1.08  | 0.077917 | 0.168445 | 0.777    | 1.5      | 0.643675 | 0.912384 |
| Cardiovascular             | Venous surgery procedures (self-reported)                         | T | 378957 | 246   | 378855 | 1.15  | 0.142603 | 0.308729 | 0.63     | 2.11     | 0.64415  | 0.912384 |
| Operations and Procedures  | Ercp endoscopic retrograde cholangiopancreatogram (self-reported) | T | 378957 | 341   | 378760 | 1.13  | 0.122058 | 0.264317 | 0.673    | 1.9      | 0.644236 | 0.912384 |
| Gynaecology and Obstetrics | Ever had stillbirth spontaneous miscarriage or termination        | T | 201175 | 64150 | 137096 | 1.01  | 0.011322 | 0.024397 | 0.964    | 1.06     | 0.6426   | 0.912384 |
| Operations and Procedures  | Other operations on pilonidal sinus                               | T | 378957 | 206   | 378895 | 1.17  | 0.158147 | 0.341226 | 0.6      | 2.29     | 0.64303  | 0.912384 |
| Medication                 | Laxatives e.g Dulcolax Senokot                                    | T | 374624 | 10818 | 363950 | 0.977 | -0.02348 | 0.050729 | 0.884    | 1.08     | 0.643427 | 0.912384 |
| Summary                    | Musculoskeletal system and connective tissue (HES)                | T | 378957 | 844   | 378257 | 1.08  | 0.077889 | 0.170605 | 0.774    | 1.51     | 0.647998 | 0.914    |
| Musculoskeletal            | Myositis (HES)                                                    | T | 378957 | 207   | 378894 | 0.838 | -0.17662 | 0.384714 | 0.394    | 1.78     | 0.646169 | 0.914    |
| Genitourinary              | Salpingitis and oophoritis (HES)                                  | T | 378957 | 472   | 378629 | 1.11  | 0.102117 | 0.223697 | 0.714    | 1.72     | 0.648033 | 0.914    |
| Operations and Procedures  | Destruction of lesion of retina                                   | T | 378957 | 2270  | 376831 | 0.951 | -0.05028 | 0.109778 | 0.767    | 1.18     | 0.646923 | 0.914    |
| Operations and Procedures  | Primary repair of femoral hernia                                  | T | 378957 | 527   | 378574 | 0.898 | -0.10707 | 0.233953 | 0.568    | 1.42     | 0.647161 | 0.914    |
| Operations and Procedures  | Adjustment to length of tendon                                    | T | 378957 | 2142  | 376959 | 0.95  | -0.05166 | 0.11304  | 0.761    | 1.19     | 0.64765  | 0.914    |
| Metabolic                  | Graves disease (HES and self-reported)                            | T | 378957 | 476   | 378625 | 0.893 | -0.11304 | 0.242757 | 0.55     | 1.45     | 0.647536 | 0.914    |
| Family history             | Bowel cancer (family history - father)                            | T | 338597 | 19587 | 319142 | 1.02  | 0.017031 | 0.03741  | 0.945    | 1.09     | 0.648918 | 0.914177 |
| Neurosciences              | Infection of nervous system (HES and self-reported)               | T | 378957 | 529   | 378572 | 0.899 | -0.10653 | 0.233865 | 0.568    | 1.42     | 0.64873  | 0.914177 |
| Medication                 | Other dermatological preparations                                 | T | 378957 | 20932 | 358169 | 1.02  | 0.016466 | 0.036339 | 0.947    | 1.09     | 0.650457 | 0.915423 |
| Digestive system           | Acute appendicitis (HES)                                          | T | 378957 | 629   | 376472 | 1.05  | 0.044499 | 0.098237 | 0.862    | 1.27     | 0.650562 | 0.915423 |
| Operations and Procedures  | Excision of dental lesion of jaw                                  | T | 378957 | 264   | 378477 | 1.09  | 0.089062 | 0.197016 | 0.743    | 1.61     | 0.651229 | 0.915826 |
| Eye                        | Disorders of lacrimal system (HES)                                | T | 378957 | 1950  | 377151 | 0.948 | -0.05328 | 0.118955 | 0.751    | 1.2      | 0.654244 | 0.917681 |
| Genitourinary              | Chronic renal failure (HES)                                       | T | 378957 | 4070  | 375031 | 0.964 | -0.03647 | 0.081608 | 0.822</  |          |          |          |

|                            |                                                                        |   |        |        |        |       |          |          |          |          |          |          |
|----------------------------|------------------------------------------------------------------------|---|--------|--------|--------|-------|----------|----------|----------|----------|----------|----------|
| Operations and Procedures  | Burrhole approach to contents of cranium                               | T | 378957 | 411    | 378690 | 1.11  | 0.101489 | 0.241304 | 0.69     | 1.78     | 0.674056 | 0.926706 |
| Metal                      | Lung cancer (self-reported)                                            | T | 378957 | 205    | 378896 | 0.851 | -0.16148 | 0.384862 | 0.4      | 1.81     | 0.674785 | 0.926711 |
| Metabolic                  | Hyperparathyroidism (HES and self-reported)                            | T | 378957 | 788    | 378313 | 1.08  | 0.073536 | 0.175658 | 0.763    | 1.52     | 0.675486 | 0.927206 |
| Cancer                     | Skin cancer (self-reported)                                            | T | 378957 | 1189   | 377912 | 1.06  | 0.059948 | 0.143531 | 0.801    | 1.41     | 0.676193 | 0.927647 |
| Metabolic                  | Thyrototoxicosis (HES)                                                 | T | 378957 | 1663   | 377438 | 0.948 | -0.05336 | 0.128837 | 0.736    | 1.22     | 0.678732 | 0.92822  |
| Mental health              | Sexual dysfunction not caused disorder or disease (HES)                | T | 378957 | 264    | 378837 | 0.871 | -0.13797 | 0.339516 | 0.448    | 1.69     | 0.684471 | 0.92822  |
| Neurosciences              | Nerve root and plexus disorders (HES)                                  | T | 378957 | 316    | 378785 | 1.12  | 0.112181 | 0.273616 | 0.654    | 1.91     | 0.681809 | 0.92822  |
| ENT                        | Other hearing loss (HES)                                               | T | 378957 | 2563   | 376538 | 0.959 | -0.04207 | 0.102976 | 0.784    | 1.17     | 0.682899 | 0.92822  |
| Cardiovascular             | Sequelae of cerebrovascular disease (HES)                              | T | 378957 | 1161   | 377940 | 1.06  | 0.060171 | 0.146349 | 0.797    | 1.41     | 0.680963 | 0.92822  |
| Cardiovascular             | Varicose veins of other sites (HES)                                    | T | 378957 | 460    | 378641 | 0.902 | -0.10358 | 0.254752 | 0.547    | 1.49     | 0.684305 | 0.92822  |
| Genitourinary              | Inflammatory diseases of prostate (HES)                                | T | 378957 | 1436   | 377665 | 0.944 | -0.05764 | 0.139499 | 0.718    | 1.24     | 0.67943  | 0.92822  |
| Medication                 | Agents against amoebiasis and other protozoal diseases                 | T | 378957 | 660    | 378441 | 0.918 | -0.08512 | 0.20818  | 0.611    | 1.38     | 0.682618 | 0.92822  |
| Medication                 | Corticosteroids and antiinfectives in combination 2                    | T | 378957 | 6221   | 372880 | 1.03  | 0.02647  | 0.064676 | 0.905    | 1.17     | 0.682342 | 0.92822  |
| Cardiovascular             | Pacemaker defibrillator insertion (self-reported)                      | T | 378957 | 680    | 378421 | 0.92  | -0.0829  | 0.204152 | 0.617    | 1.37     | 0.684702 | 0.92822  |
| Cancer                     | Hodgkin's disease (cancer register)                                    | T | 378957 | 245    | 378856 | 1.14  | 0.128321 | 0.308754 | 0.621    | 2.08     | 0.677697 | 0.92822  |
| Operations and Procedures  | Microsurgical repair of peripheral nerve                               | T | 378957 | 222    | 378879 | 1.14  | 0.132145 | 0.323858 | 0.605    | 2.15     | 0.683255 | 0.92822  |
| Operations and Procedures  | Other therapeutic endoscopic operations on larynx                      | T | 378957 | 206    | 378895 | 0.855 | -0.15686 | 0.384739 | 0.402    | 1.82     | 0.683499 | 0.92822  |
| Operations and Procedures  | Examination of sigmoid colon                                           | T | 378957 | 2690   | 376411 | 1.04  | 0.040163 | 0.09778  | 0.859    | 1.26     | 0.681256 | 0.92822  |
| Operations and Procedures  | Forceps cephalic delivery                                              | T | 378957 | 705    | 378396 | 1.08  | 0.076941 | 0.186088 | 0.75     | 1.56     | 0.679266 | 0.92822  |
| Operations and Procedures  | Exploration of other skin of head or neck                              | T | 378957 | 445    | 378656 | 1.1   | 0.097463 | 0.234731 | 0.696    | 1.75     | 0.677987 | 0.92822  |
| Operations and Procedures  | Release of fascia                                                      | T | 378957 | 204    | 378897 | 0.854 | -0.15747 | 0.384847 | 0.402    | 1.82     | 0.682413 | 0.92822  |
| Medication                 | Glucosamine                                                            | T | 377706 | 73561  | 304289 | 0.991 | -0.00876 | 0.021318 | 0.951    | 1.03     | 0.680989 | 0.92822  |
| Metabolic                  | Thyroid radioablation therapy (HES and self-reported)                  | T | 378957 | 2506   | 376595 | 0.959 | -0.04233 | 0.104055 | 0.782    | 1.18     | 0.684155 | 0.92822  |
| Metabolic                  | Disorder of adrenal gland (HES and self-reported)                      | T | 378957 | 470    | 378631 | 0.903 | -0.10239 | 0.247253 | 0.586    | 1.47     | 0.67878  | 0.92822  |
| Gynaecology and Obstetrics | Ovarian cyst or cysts (HES and self-reported)                          | T | 378957 | 6134   | 372967 | 0.973 | -0.02763 | 0.066755 | 0.853    | 1.11     | 0.678922 | 0.92822  |
| Medication                 | Antidiabetic agents peripherally acting                                | T | 378957 | 4727   | 374374 | 0.97  | -0.03075 | 0.07585  | 0.836    | 1.13     | 0.685179 | 0.928344 |
| Cardiovascular             | Carotid artery angioplasty stent (self-reported)                       | T | 378957 | 333    | 378768 | 0.888 | -0.11867 | 0.294382 | 0.499    | 1.58     | 0.686876 | 0.929076 |
| Gynaecology and Obstetrics | Ovarian tubal surgery (self-reported)                                  | T | 378957 | 1138   | 377963 | 0.939 | -0.06288 | 0.155938 | 0.692    | 1.27     | 0.686786 | 0.929076 |
| Summary                    | Neo of uncertain or unknown behaviour (cancer register)                | T | 378957 | 2117   | 376984 | 1.04  | 0.0439   | 0.108748 | 0.844    | 1.29     | 0.686445 | 0.929076 |
| Cancer                     | Carc in situ of other digestive organs (cancer register)               | T | 378957 | 262    | 378839 | 1.13  | 0.118501 | 0.295806 | 0.633    | 2.01     | 0.688711 | 0.931035 |
| Summary                    | Congenital malformations of the urinary system (HES)                   | T | 378957 | 821    | 378280 | 1.07  | 0.068802 | 0.173032 | 0.763    | 1.5      | 0.690906 | 0.932955 |
| Metabolic                  | Other hypothyroidism (HES)                                             | T | 378957 | 12869  | 366232 | 1.02  | 0.018198 | 0.045724 | 0.931    | 1.11     | 0.690639 | 0.932955 |
| Gynaecology and Obstetrics | Gestational hypertension without significant proteinuria (HES)         | T | 378957 | 427    | 378674 | 0.903 | -0.10177 | 0.256514 | 0.546    | 1.49     | 0.691562 | 0.933318 |
| Digestive system           | Irritable bowel syndrome (HES)                                         | T | 378957 | 5022   | 374079 | 0.971 | -0.02922 | 0.073818 | 0.84     | 1.12     | 0.69218  | 0.933629 |
| Musculoskeletal            | Other disorders of bone density and structure (HES)                    | T | 378957 | 998    | 378103 | 0.936 | -0.06602 | 0.167887 | 0.674    | 1.3      | 0.694147 | 0.933668 |
| Operations and Procedures  | Neurostimulation of peripheral nerve                                   | T | 378957 | 545    | 378556 | 0.914 | -0.08983 | 0.228082 | 0.585    | 1.43     | 0.6937   | 0.933668 |
| NA                         | Ischaemic stroke                                                       | T | 378957 | 3655   | 375446 | 0.966 | -0.03408 | 0.086557 | 0.816    | 1.15     | 0.69378  | 0.933668 |
| Genitourinary              | Erectile dysfunction impotence (HES and self-reported)                 | T | 378957 | 497    | 378604 | 0.909 | -0.09487 | 0.240583 | 0.568    | 1.46     | 0.693323 | 0.933668 |
| Musculoskeletal            | Fracture metatarsal (HES and self-reported)                            | T | 378957 | 436    | 378665 | 1.1   | 0.09245  | 0.23481  | 0.692    | 1.74     | 0.693787 | 0.933668 |
| Immuno-inflammation        | Other follicular disorders (HES)                                       | T | 378957 | 373    | 378728 | 1.11  | 0.100268 | 0.255788 | 0.67     | 1.83     | 0.695059 | 0.933852 |
| Medication                 | Decongestants and other nasal preparations for topical use             | T | 378957 | 33775  | 345326 | 0.989 | -0.01151 | 0.029345 | 0.933    | 1.05     | 0.694993 | 0.933852 |
| Medication                 | Hemorrhoids and anal fissures for topical use                          | T | 378957 | 11708  | 367393 | 1.02  | 0.018699 | 0.047852 | 0.928    | 1.12     | 0.695961 | 0.934543 |
| Anthropometry              | Visceral adipose tissue volume VAT                                     | T | 801    | NA     | NA     | NA    | -0.07798 | 0.199962 | -0.46991 | 0.313943 | 0.696545 | 0.934806 |
| Medication                 | Beta lactam antibacterials penicillins                                 | T | 378957 | 1102   | 377999 | 1.06  | 0.058641 | 0.150896 | 0.789    | 1.43     | 0.697556 | 0.935121 |
| Operations and Procedures  | Discectomy (self-reported)                                             | T | 378957 | 1381   | 377720 | 1.05  | 0.052281 | 0.134474 | 0.81     | 1.37     | 0.697438 | 0.935121 |
| Operations and Procedures  | Compensation for renal failure                                         | T | 378957 | 703    | 378398 | 0.925 | -0.07767 | 0.200136 | 0.625    | 1.37     | 0.697952 | 0.935131 |
| Medication                 | Angiotensin ii antagonists combinations                                | T | 378957 | 30598  | 348503 | 0.988 | -0.01207 | 0.031154 | 0.929    | 1.05     | 0.698554 | 0.935415 |
| Medication                 | Other gynecologicals                                                   | T | 378957 | 52465  | 326636 | 1.01  | 0.009265 | 0.02419  | 0.963    | 1.06     | 0.701697 | 0.935415 |
| Summary                    | Viral infections skin and mucous memb (HES)                            | T | 378957 | 1422   | 377679 | 1.05  | 0.050935 | 0.133293 | 0.81     | 1.37     | 0.702367 | 0.935415 |
| Summary                    | Bacterial viral and other infectious agents (HES)                      | T | 378957 | 11829  | 367272 | 1.02  | 0.018151 | 0.047689 | 0.927    | 1.12     | 0.703491 | 0.935415 |
| Metabolic                  | Deficiency of other B group vitamins (HES)                             | T | 378957 | 664    | 378437 | 1.08  | 0.073999 | 0.193361 | 0.737    | 1.57     | 0.701942 | 0.935415 |
| Gynaecology and Obstetrics | Other maternal diseases complicating pregnancy (HES)                   | T | 378957 | 1582   | 377519 | 0.951 | -0.05076 | 0.132682 | 0.733    | 1.23     | 0.702034 | 0.935415 |
| Symptoms                   | Localized swelling mass and lump of skin and subcutaneous tissue (HES) | T | 378957 | 1921   | 377180 | 0.955 | -0.04559 | 0.11967  | 0.756    | 1.21     | 0.703256 | 0.935415 |
| Symptoms                   | Symptoms cognitive functions and awareness (HES)                       | T | 378957 | 2889   | 376212 | 1.04  | 0.035812 | 0.094155 | 0.862    | 1.25     | 0.703681 | 0.935415 |
| Operations and Procedures  | Plastic repair of mitral valve                                         | T | 378957 | 528    | 378573 | 1.08  | 0.081239 | 0.213561 | 0.714    | 1.65     | 0.703648 | 0.935415 |
| Operations and Procedures  | Neuropsychology tests                                                  | T | 378957 | 256    | 378845 | 0.879 | -0.12901 | 0.339556 | 0.452    | 1.71     | 0.703988 | 0.935415 |
| Eye                        | Eye trauma (HES and self-reported)                                     | T | 378957 | 816    | 378285 | 1.07  | 0.066781 | 0.175496 | 0.758    | 1.51     | 0.703552 | 0.935415 |
| Neurosciences              | Trigeminal neuralgia (HES and self-reported)                           | T | 378957 | 464    | 378637 | 0.909 | -0.09553 | 0.247351 | 0.56     | 1.48     | 0.699331 | 0.935415 |
| Eye                        | Macular degeneration (HES and self-reported)                           | T | 378957 | 2130   | 376971 | 0.958 | -0.04304 | 0.112573 | 0.768    | 1.19     | 0.702226 | 0.935415 |
| Other                      | Morning evening person chronotype                                      | T | 338480 | NA     | NA     | NA    | -0.00336 | 0.008821 | -0.02065 | 0.013929 | 0.703201 | 0.935415 |
| Cardiovascular             | Mean carotid IMT intima medial thickness at 210 degrees                | T | 1850   | NA     | NA     | NA    | -0.04795 | 0.123983 | -0.29095 | 0.195061 | 0.698971 | 0.935415 |
| Cardiovascular             | Other lymphatic vessels and lymph nodes (HES)                          | T | 378957 | 601    | 378500 | 1.08  | 0.075959 | 0.200755 | 0.728    | 1.6      | 0.705159 | 0.935711 |
| Digestive system           | Other diseases of lip and oral mucosa (HES)                            | T | 378957 | 2606   | 376495 | 0.962 | -0.03891 | 0.102871 | 0.786    | 1.18     | 0.705275 | 0.935711 |
| Operations and Procedures  | Therapeutic endoscopic operations on uterus                            | T | 378957 | 6827   | 372274 | 0.976 | -0.02402 | 0.063521 | 0.862    | 1.11     | 0.705376 | 0.935711 |
| Genitourinary              | Cystic kidney disease (HES)                                            | T | 378957 | 414    | 378687 | 1.1   | 0.090913 | 0.241262 | 0.683    | 1.76     | 0.706305 | 0.936427 |
| Biological assays          | Nucleated red blood cell count                                         | T | 367058 | NA     | NA     | NA    | -0.00316 | 0.008418 | -0.01966 | 0.01334  | 0.707388 | 0.937347 |
| Musculoskeletal            | Fracture upper arm humerus elbow (HES and self-reported)               | T | 378957 | 3361   | 375740 | 0.967 | -0.03347 | 0.090218 | 0.81     | 1.15     | 0.71067  | 0.941179 |
| Cardiovascular             | Subarachnoid haemorrhage (HES)                                         | T | 378957 | 743    | 378358 | 1.07  | 0.067992 | 0.183752 | 0.747    | 1.53     | 0.711367 | 0.941584 |
| Neurosciences              | Multiple sclerosis (HES)                                               | T | 378957 | 1215   | 377886 | 1.05  | 0.052962 | 0.143401 | 0.796    | 1.4      | 0.711882 | 0.941653 |
| Respiratory                | Postprocedural respiratory disorders (HES)                             | T | 378957 | 334    | 378767 | 0.898 | -0.10778 | 0.294254 | 0.504    | 1.6      | 0.714155 | 0.941653 |
| Gynaecology and Obstetrics | Postpartum haemorrhage (HES)                                           | T | 378957 | 1204   | 377897 | 1.05  | 0.053222 | 0.144808 | 0.794    | 1.4      | 0.713218 | 0.941653 |
| Cancer                     | Cervical cancer (self-reported)                                        | T | 378957 | 1533   | 377568 | 1.05  | 0.04773  | 0.128253 | 0.815    | 1.35     | 0.712275 | 0.941653 |
| Operations and Procedures  | Colonoscopy sigmoidoscopy (self-reported)                              | T | 378957 | 7510   | 371591 | 0.978 | -0.02222 | 0.060548 | 0.869    | 1.1      | 0.713644 | 0.941653 |
| Summary                    | Had major operations                                                   | T | 173294 | 111364 | 62003  | 1.01  | 0.009582 | 0.026148 | 0.959    | 1.06     | 0.714041 | 0.941653 |
| Operations and Procedures  | Other examination of female genital tract                              | T | 378957 | 3998   | 375103 | 0.97  | -0.03043 | 0.083034 | 0.824    | 1.14     | 0.713988 | 0.941653 |
| Digestive system           | Unspecified appendicitis (HES)                                         | T | 378957 | 412    | 378689 | 0.908 | -0.09615 | 0.263275 | 0.542    | 1.52     | 0.714958 | 0.942196 |
| Medication                 | Calcium channel blockers and diuretics                                 | T | 378957 | 18780  | 360321 | 0.986 | -0.01411 | 0.038961 | 0.913    | 1.06     | 0.71719  | 0.942262 |
| Summary                    | HESCH Pregnancy childbirth and the puerperium (HES)                    | T | 378957 | 12811  | 366290 | 0.98  | -0.01974 | 0.054225 | 0.882    | 1.09     | 0.715883 | 0.942262 |
| Operations and Procedures  | Closure of cornea                                                      | T | 378957 | 204    | 378897 | 0.87  | -0.1397  | 0.384808 | 0.409    | 1.85     | 0.716571 | 0.942262 |
| Operations and Procedures  | Endoscopic retrograde placement of prosthesis in bile duct             | T | 378957 | 506    | 378541 | 1.08  | 0.075636 | 0.208942 | 0.716    | 1.62     | 0.717355 | 0.942262 |
| Operations and Procedures  | Other operations to facilitate delivery                                | T | 378957 | 2119   | 376982 | 0.959 | -0.04175 | 0.115202 | 0.765    | 1.2      | 0.717052 | 0.942262 |
| Cardiovascular             | Cardiac output                                                         | T | 3764   | NA     | NA     | NA    | 0.032491 | 0.089721 | -0.14336 | 0.208344 | 0.717254 | 0.942262 |
| Operations and Procedures  | Other operations on peripheral nerve                                   | T | 378957 | 2062   | 377039 | 0.959 | -0.04135 | 0.115085 | 0.766    | 1.2      | 0.719338 | 0.942938 |
| Operations and Procedures  | Other vaginal operations on uterus                                     | T | 378957 | 1552   | 377549 | 1.05  | 0.045384 | 0.126712 | 0.816    | 1.34     | 0.720218 | 0.942938 |
| Operations and Procedures  | Other route of administration of therapeutic substance                 | T | 378957 | 241    | 378860 | 0.879 | -0.12946 | 0.359784 | 0.434    | 1.78     | 0.718968 | 0.942938 |
| Operations and Procedures  | Immobilisation using plaster cast                                      | T | 378957 | 694    | 378407 | 1.07  | 0.068205 | 0.189962 | 0.738    | 1.55     | 0.71956  | 0.942938 |
| Operations and Procedures  | Biopsy of organ NOC                                                    | T | 378957 | 7160   | 371941 | 1.02  | 0.021675 | 0.060466 | 0.908    | 1.15     | 0.71999  | 0.942938 |
| Digestive system           | Colitistis crohns or ulcerative colitis (HES and self-reported)        | T | 378957 | 15433  | 363668 | 1.02  | 0.015101 | 0.041893 | 0.935    | 1        |          |          |



|                            |                                                              |   |        |        |        |       |          |          |          |          |          |          |
|----------------------------|--------------------------------------------------------------|---|--------|--------|--------|-------|----------|----------|----------|----------|----------|----------|
| ENT                        | Hear loss B                                                  | T | 120977 | NA     | NA     | NA    | 0.004957 | 0.014545 | -0.02355 | 0.033466 | 0.733226 | 0.949189 |
| Operations and Procedures  | Repair of diaphragmatic hernia                               | T | 378957 | 276    | 378825 | 0.898 | -0.10779 | 0.322328 | 0.477    | 1.69     | 0.738063 | 0.950291 |
| Metabolic                  | Thyroid radioablation therapy (self-reported)                | T | 378957 | 360    | 378741 | 0.91  | -0.0941  | 0.282759 | 0.523    | 1.58     | 0.739287 | 0.95085  |
| ENT                        | Chronic sinusitis (HES and self-reported)                    | T | 378957 | 4361   | 374740 | 0.974 | -0.02628 | 0.078934 | 0.834    | 1.14     | 0.739178 | 0.95085  |
| Summary                    | Oed prod and hyprtn dis in preg chldbrth (HES)               | T | 378957 | 1199   | 377902 | 0.952 | -0.04965 | 0.151531 | 0.707    | 1.28     | 0.743163 | 0.952697 |
| Neurosciences              | Other paralytic syndromes (HES)                              | T | 378957 | 334    | 378767 | 0.908 | -0.09678 | 0.29422  | 0.51     | 1.62     | 0.742207 | 0.952697 |
| Symptoms                   | Oedema (HES)                                                 | T | 378957 | 1490   | 377611 | 0.956 | -0.04449 | 0.135432 | 0.733    | 1.25     | 0.742518 | 0.952697 |
| Summary                    | Mal neo of mesothelial and soft tissue (cancer register)     | T | 378957 | 538    | 378563 | 0.928 | -0.075   | 0.228155 | 0.593    | 1.45     | 0.74237  | 0.952697 |
| Operations and Procedures  | Endoscopic operations to increase capacity of bladder        | T | 378957 | 1067   | 378034 | 0.948 | -0.05299 | 0.161504 | 0.691    | 1.3      | 0.742829 | 0.952697 |
| Operations and Procedures  | Other operations on penis                                    | T | 378957 | 452    | 378649 | 1.08  | 0.077189 | 0.234862 | 0.682    | 1.71     | 0.742417 | 0.952697 |
| Operations and Procedures  | Other operations on subcutaneous tissue                      | T | 378957 | 494    | 378607 | 0.924 | -0.07866 | 0.240375 | 0.577    | 1.48     | 0.743491 | 0.952697 |
| Summary                    | Delivery (HES)                                               | T | 378957 | 2450   | 376651 | 0.966 | -0.03445 | 0.107352 | 0.783    | 1.19     | 0.748261 | 0.95278  |
| Haematology                | Acute posthaemorrhagic anaemia (HES)                         | T | 378957 | 226    | 378875 | 1.11  | 0.103539 | 0.323725 | 0.588    | 2.09     | 0.749093 | 0.95278  |
| Genitourinary              | Vulvovaginal ulceration and inflammation (HES)               | T | 378957 | 202    | 378899 | 1.12  | 0.110329 | 0.341402 | 0.572    | 2.18     | 0.746571 | 0.95278  |
| Genitourinary              | Erosion and ectropion of cervix uteri (HES)                  | T | 378957 | 830    | 378271 | 0.943 | -0.05817 | 0.180933 | 0.662    | 1.35     | 0.747839 | 0.95278  |
| Genitourinary              | Menopausal and other perimenopausal disorders (HES)          | T | 378957 | 9413   | 369688 | 1.02  | 0.017315 | 0.053625 | 0.916    | 1.13     | 0.746785 | 0.95278  |
| Medication                 | Other antibacterials                                         | T | 378957 | 1343   | 377558 | 0.955 | -0.04586 | 0.143071 | 0.722    | 1.26     | 0.748576 | 0.95278  |
| Operations and Procedures  | Achilles tendon repair (self-reported)                       | T | 378957 | 613    | 378488 | 0.934 | -0.06813 | 0.212809 | 0.616    | 1.42     | 0.748847 | 0.95278  |
| Neurosciences              | Neck shoulder pain for 3 months vs no pain                   | T | 344799 | 58990  | 285942 | 1.01  | 0.00743  | 0.02319  | 0.963    | 1.05     | 0.748622 | 0.95278  |
| Operations and Procedures  | Other open operations on valve of heart                      | T | 378957 | 301    | 378800 | 0.905 | -0.09954 | 0.307443 | 0.496    | 1.65     | 0.746123 | 0.95278  |
| Operations and Procedures  | Diagnostic transluminal operations on coronary artery        | T | 378957 | 808    | 378293 | 0.942 | -0.05975 | 0.186415 | 0.654    | 1.36     | 0.748574 | 0.95278  |
| Operations and Procedures  | Diagnostic transluminal operations on vein                   | T | 378957 | 931    | 378170 | 1.05  | 0.053187 | 0.163886 | 0.765    | 1.45     | 0.745533 | 0.95278  |
| Operations and Procedures  | Diagnostic testing of genitourinary system                   | T | 378957 | 578    | 378523 | 1.07  | 0.067699 | 0.208791 | 0.711    | 1.61     | 0.745754 | 0.95278  |
| Eye                        | Retinal problem (HES and self-reported)                      | T | 378957 | 7219   | 371882 | 1.02  | 0.019224 | 0.060062 | 0.906    | 1.15     | 0.748918 | 0.95278  |
| Biological assays          | White blood cell leukocyte count                             | T | 367717 | NA     | NA     | NA    | 0.002733 | 0.008435 | -0.0138  | 0.019266 | 0.745932 | 0.95278  |
| Other                      | Snoring                                                      | T | 352620 | 131409 | 221344 | 0.994 | -0.00581 | 0.018225 | 0.959    | 1.03     | 0.74975  | 0.95282  |
| Gynaecology and Obstetrics | Fibrocystic disease (HES and self-reported)                  | T | 378957 | 1743   | 377358 | 0.961 | -0.03989 | 0.125136 | 0.752    | 1.23     | 0.749916 | 0.95282  |
| Medication                 | Vitamin B12 and folic acid                                   | T | 378957 | 8262   | 370839 | 0.982 | -0.01823 | 0.057815 | 0.877    | 1.1      | 0.752531 | 0.953127 |
| Medication                 | Thyroid preparations                                         | T | 378957 | 21493  | 357608 | 1.01  | 0.011406 | 0.036193 | 0.942    | 1.09     | 0.752664 | 0.953127 |
| Gynaecology and Obstetrics | Labour and delivery complicated by fetal stress (HES)        | T | 378957 | 3031   | 376070 | 1.03  | 0.029822 | 0.094742 | 0.856    | 1.24     | 0.752994 | 0.953127 |
| Mental health              | Probable recurrent major depression moderate                 | T | 58804  | 116977 | 47141  | 0.983 | -0.01701 | 0.054066 | 0.884    | 1.09     | 0.75304  | 0.953127 |
| Operations and Procedures  | Other therapeutic transluminal operations on coronary artery | T | 378957 | 858    | 378243 | 1.06  | 0.053583 | 0.170787 | 0.755    | 1.47     | 0.753718 | 0.953127 |
| Operations and Procedures  | Prosthetic replacement of head of femur using cement         | T | 378957 | 222    | 378879 | 0.893 | -0.11313 | 0.36043  | 0.441    | 1.81     | 0.753616 | 0.953127 |
| Respiratory                | Respiratory failure (HES and self-reported)                  | T | 378957 | 1951   | 377150 | 0.964 | -0.0371  | 0.118243 | 0.764    | 1.21     | 0.753713 | 0.953127 |
| Genitourinary              | Renalkidney failure (HES and self-reported)                  | T | 378957 | 8356   | 370745 | 1.02  | 0.017887 | 0.056279 | 0.912    | 1.14     | 0.750616 | 0.953127 |
| Musculoskeletal            | Fracture patella knee (HES and self-reported)                | T | 378957 | 515    | 378586 | 0.929 | -0.07349 | 0.233992 | 0.587    | 1.47     | 0.753463 | 0.953127 |
| Operations and Procedures  | Other operations on ventricle of brain                       | T | 378957 | 227    | 378874 | 0.894 | -0.1125  | 0.360157 | 0.441    | 1.81     | 0.754764 | 0.953764 |
| Respiratory                | GOLD tobinn                                                  | T | 18298  | NA     | NA     | NA    | -0.01153 | 0.036954 | -0.08396 | 0.060898 | 0.755014 | 0.953764 |
| Digestive system           | Intestinal malabsorption (HES)                               | T | 378957 | 1888   | 377213 | 0.964 | -0.03717 | 0.119728 | 0.762    | 1.22     | 0.756216 | 0.954269 |
| Genitourinary              | Neuromuscular dysfunction of bladder (HES)                   | T | 378957 | 1508   | 377593 | 1.04  | 0.040621 | 0.131059 | 0.806    | 1.35     | 0.756602 | 0.954269 |
| Operations and Procedures  | Operations on frontal sinus                                  | T | 378957 | 1944   | 377157 | 1.04  | 0.035805 | 0.115228 | 0.827    | 1.3      | 0.756003 | 0.954269 |
| Medication                 | Antiproliferatives                                           | T | 378957 | 2041   | 377060 | 0.965 | -0.03527 | 0.115111 | 0.77     | 1.21     | 0.759299 | 0.954769 |
| ENT                        | Otosclerosis (HES)                                           | T | 378957 | 275    | 378826 | 0.905 | -0.09935 | 0.322356 | 0.481    | 1.7      | 0.757926 | 0.954769 |
| Respiratory                | Chronic sinusitis (HES)                                      | T | 378957 | 2225   | 376876 | 0.967 | -0.03383 | 0.110955 | 0.778    | 1.2      | 0.760471 | 0.954769 |
| Immuno-inflammation        | Urticaria (HES)                                              | T | 378957 | 328    | 378773 | 1.09  | 0.084003 | 0.273388 | 0.636    | 1.86     | 0.758641 | 0.954769 |
| Immuno-inflammation        | Follicular cysts of skin and subcutaneous tissue (HES)       | T | 378957 | 7583   | 371518 | 1.02  | 0.018033 | 0.059164 | 0.907    | 1.14     | 0.760518 | 0.954769 |
| Symptoms                   | Malaise and fatigue (HES)                                    | T | 378957 | 2616   | 376485 | 1.03  | 0.030342 | 0.099569 | 0.848    | 1.25     | 0.760565 | 0.954769 |
| Digestive system           | Oesophageal stricture (HES and self-reported)                | T | 378957 | 1781   | 377320 | 1.04  | 0.036804 | 0.119943 | 0.82     | 1.31     | 0.758961 | 0.954769 |
| Cardiovascular             | Aortic aneurysm (HES and self-reported)                      | T | 378957 | 1220   | 377881 | 1.04  | 0.043481 | 0.142499 | 0.79     | 1.38     | 0.760267 | 0.954769 |
| Other                      | NumCigarettes                                                | T | 111849 | NA     | NA     | NA    | 0.004756 | 0.015477 | -0.02558 | 0.035091 | 0.758596 | 0.954769 |
| Gynaecology and Obstetrics | Cervix surgery (self-reported)                               | T | 378957 | 1570   | 377531 | 1.04  | 0.038526 | 0.127241 | 0.81     | 1.33     | 0.762059 | 0.955469 |
| Operations and Procedures  | Other therapeutic transluminal operations on heart           | T | 378957 | 1372   | 377729 | 0.958 | -0.04247 | 0.140413 | 0.728    | 1.26     | 0.762313 | 0.955469 |
| Metabolic                  | Parathyroid gland problem not cancer (HES and self-reported) | T | 378957 | 274    | 378827 | 1.09  | 0.089505 | 0.295471 | 0.613    | 1.95     | 0.761948 | 0.955469 |
| Medication                 | Digestives incl enzymes                                      | T | 378957 | 255    | 378846 | 1.1   | 0.093133 | 0.308479 | 0.6      | 2.01     | 0.76272  | 0.955482 |
| Summary                    | Influenza and pneumonia (HES)                                | T | 378957 | 9013   | 370088 | 0.984 | -0.01651 | 0.055066 | 0.883    | 1.1      | 0.7643   | 0.955507 |
| Cardiovascular             | Occlusion and stenosis not cerebral infarction (HES)         | T | 378957 | 928    | 378173 | 0.95  | -0.05172 | 0.172778 | 0.677    | 1.33     | 0.764696 | 0.955507 |
| Operations and Procedures  | Clearance of external auditory canal                         | T | 378957 | 325    | 378776 | 0.915 | -0.08851 | 0.294377 | 0.514    | 1.63     | 0.76367  | 0.955507 |
| Operations and Procedures  | Total excision of bone                                       | T | 378957 | 1188   | 377913 | 0.956 | -0.04497 | 0.150771 | 0.711    | 1.28     | 0.765516 | 0.955507 |
| Operations and Procedures  | Other open operations on joint                               | T | 378957 | 1273   | 377828 | 0.957 | -0.04363 | 0.145979 | 0.719    | 1.27     | 0.765047 | 0.955507 |
| Medication                 | Ranitidine e g Zantac                                        | T | 374624 | 7205   | 367563 | 0.982 | -0.0185  | 0.061906 | 0.869    | 1.11     | 0.765024 | 0.955507 |
| Digestive system           | Oesophageal disorder (HES and self-reported)                 | T | 378957 | 9080   | 370021 | 1.02  | 0.016207 | 0.054269 | 0.914    | 1.13     | 0.765214 | 0.955507 |
| Neurosciences              | Polyneuropathy in diseases classified elsewhere (HES)        | T | 378957 | 353    | 378748 | 0.919 | -0.08419 | 0.282866 | 0.528    | 1.6      | 0.765988 | 0.955601 |
| Musculoskeletal            | Muscle or soft tissue injuries (HES and self-reported)       | T | 378957 | 9386   | 369715 | 1.02  | 0.015801 | 0.053295 | 0.915    | 1.13     | 0.766861 | 0.956195 |
| Medication                 | Antifungals for topical use                                  | T | 378957 | 3710   | 375391 | 0.975 | -0.02522 | 0.085752 | 0.824    | 1.15     | 0.768705 | 0.957008 |
| Respiratory                | Other pleural conditions (HES)                               | T | 378957 | 242    | 378859 | 0.905 | -0.10009 | 0.339991 | 0.465    | 1.76     | 0.768452 | 0.957008 |
| Cardiovascular             | LVESVI                                                       | T | 3760   | NA     | NA     | NA    | 0.026442 | 0.089813 | -0.14959 | 0.202475 | 0.768439 | 0.957008 |
| Operations and Procedures  | Incision of capsule of lens                                  | T | 378957 | 1497   | 377604 | 0.961 | -0.03932 | 0.134397 | 0.739    | 1.25     | 0.76985  | 0.957013 |
| Anthropometry              | Abdominal subcutaneous adipose tissue volume ASAT            | T | 801    | NA     | NA     | NA    | 0.058453 | 0.199835 | -0.33322 | 0.450129 | 0.769901 | 0.957013 |
| Biological assays          | Mean corpuscular volume                                      | T | 367720 | NA     | NA     | NA    | 0.002468 | 0.008419 | -0.01403 | 0.01897  | 0.769429 | 0.957013 |
| Genitourinary              | Renal failure not requiring dialysis (HES and self-reported) | T | 378957 | 483    | 378618 | 0.932 | -0.07009 | 0.240482 | 0.582    | 1.49     | 0.770713 | 0.957528 |
| Summary                    | Other degenerative diseases of the nervous system (HES)      | T | 378957 | 907    | 378194 | 1.05  | 0.047765 | 0.166135 | 0.757    | 1.45     | 0.773725 | 0.958762 |
| Summary                    | Dermatitis and eczema (HES)                                  | T | 378957 | 2862   | 376239 | 0.972 | -0.02792 | 0.097624 | 0.803    | 1.18     | 0.774869 | 0.958762 |
| Infectious disease         | Zoster (HES)                                                 | T | 378957 | 425    | 378676 | 1.07  | 0.069363 | 0.241136 | 0.668    | 1.72     | 0.773613 | 0.958762 |
| Infectious disease         | Viral infection of unspecified site (HES)                    | T | 378957 | 1590   | 377511 | 1.04  | 0.036272 | 0.126977 | 0.808    | 1.33     | 0.77514  | 0.958762 |
| Eye                        | Other inflammation of eyelid (HES)                           | T | 378957 | 538    | 378563 | 1.06  | 0.060959 | 0.213397 | 0.7      | 1.61     | 0.77514  | 0.958762 |
| Cardiovascular             | Haemorrhoids (HES)                                           | T | 378957 | 21509  | 357592 | 1.01  | 0.01026  | 0.035885 | 0.942    | 1.08     | 0.774943 | 0.958762 |
| Eye                        | Squint correction (self-reported)                            | T | 378957 | 5064   | 374037 | 0.979 | -0.02099 | 0.073016 | 0.849    | 1.13     | 0.773757 | 0.958762 |
| Operations and Procedures  | Other operations on eye                                      | T | 378957 | 768    | 378333 | 1.05  | 0.05161  | 0.180877 | 0.739    | 1.5      | 0.775389 | 0.958762 |
| Operations and Procedures  | Release of organ NOC                                         | T | 378957 | 896    | 378205 | 0.951 | -0.0499  | 0.175123 | 0.675    | 1.34     | 0.775686 | 0.958762 |
| Medication                 | Vitamin C                                                    | T | 376892 | 32744  | 344292 | 1.01  | 0.00855  | 0.029535 | 0.952    | 1.07     | 0.772209 | 0.958762 |
| Metabolic                  | Deficiency of other nutrient elements (HES)                  | T | 378957 | 216    | 378885 | 0.904 | -0.10134 | 0.360498 | 0.446    | 1.83     | 0.778618 | 0.959796 |
| Mental health              | Schizophrenia (HES)                                          | T | 378957 | 496    | 378605 | 0.936 | -0.06584 | 0.240328 | 0.585    | 1.5      | 0.784126 | 0.959796 |
| Cardiovascular             | Hypertensive renal disease (HES)                             | T | 378957 | 1396   | 377705 | 1.04  | 0.037484 | 0.134569 | 0.798    | 1.35     | 0.780593 | 0.959796 |
| Respiratory                | Bacterial pneumonia (HES)                                    | T | 378957 | 433    | 378668 | 0.931 | -0.07194 | 0.255013 | 0.565    | 1.53     | 0.777869 | 0.959796 |
| Immuno-inflammation        | Rosacea (HES)                                                | T | 378957 | 277    | 378824 | 0.914 | -0.08941 | 0.322314 | 0.486    | 1.72     | 0.781475 | 0.959796 |
| Musculoskeletal            | Other acquired deformities of limbs (HES)                    | T | 378957 | 1540   | 377561 | 0.964 | -0.03653 | 0.132031 | 0.744    | 1.25     | 0.782045 | 0.959796 |
| Genitourinary              | Unspecified lump in breast (HES)                             | T | 378957 | 1403   | 377698 | 1.04  | 0.037211 | 0.13462  | 0.797    | 1.35     | 0.782226 | 0.959796 |
| Genitourinary              | Other noninflammatory disorders of vulva and perineum (HES)  | T | 378957 | 1719   | 377382 | 1.03  | 0.034338 | 0.121787 | 0.815    | 1.31     | 0.777983 | 0.959796 |
| Other</                    |                                                              |   |        |        |        |       |          |          |          |          |          |          |

|                            |                                                                          |   |        |        |        |       |          |          |          |          |          |          |
|----------------------------|--------------------------------------------------------------------------|---|--------|--------|--------|-------|----------|----------|----------|----------|----------|----------|
| Operations and Procedures  | Brain surgery (self-reported)                                            | T | 378957 | 1560   | 377541 | 1.03  | 0.033148 | 0.127966 | 0.804    | 1.33     | 0.795607 | 0.964093 |
| Musculoskeletal            | Fracture jaw (HES and self-reported)                                     | T | 378957 | 790    | 378311 | 1.05  | 0.046881 | 0.180805 | 0.735    | 1.49     | 0.795412 | 0.964093 |
| Immuno-inflammation        | Hyperthrophic disorders of skin (HES)                                    | T | 378957 | 1003   | 378098 | 1.04  | 0.041167 | 0.159747 | 0.762    | 1.43     | 0.796639 | 0.964479 |
| Operations and Procedures  | Excision of tendon                                                       | T | 378957 | 253    | 378848 | 1.08  | 0.07947  | 0.308517 | 0.591    | 1.98     | 0.796726 | 0.964479 |
| Immuno-inflammation        | Blistering/desquamating skin disorder (HES and self-reported)            | T | 378957 | 748    | 378533 | 1.05  | 0.047131 | 0.183704 | 0.731    | 1.5      | 0.797519 | 0.964954 |
| Infectious disease         | Viral agents as the cause of diseases classified to other chapters (HES) | T | 378957 | 505    | 378596 | 0.942 | -0.05991 | 0.234156 | 0.595    | 1.49     | 0.798065 | 0.96513  |
| Medication                 | Peripheral vasodilators                                                  | T | 378957 | 334    | 378767 | 1.07  | 0.064158 | 0.273295 | 0.624    | 1.82     | 0.814398 | 0.9652   |
| Summary                    | Disorders of thyroid gland (HES)                                         | T | 378957 | 15440  | 363661 | 0.99  | -0.0103  | 0.042451 | 0.911    | 1.08     | 0.808328 | 0.9652   |
| Summary                    | Organic including symptomatic mental disorders (HES)                     | T | 378957 | 1447   | 377654 | 1.03  | 0.023531 | 0.132398 | 0.797    | 1.34     | 0.805909 | 0.9652   |
| Summary                    | Other disorders of the nervous system (HES)                              | T | 378957 | 3742   | 375359 | 1.02  | 0.020741 | 0.083268 | 0.867    | 1.2      | 0.803291 | 0.9652   |
| Summary                    | Respiratory diseases interstitium (HES)                                  | T | 378957 | 1501   | 377600 | 0.969 | -0.03146 | 0.134349 | 0.745    | 1.26     | 0.81485  | 0.9652   |
| Summary                    | Inflammatory diseases of female pelvic organs (HES)                      | T | 378957 | 5417   | 373684 | 1.02  | 0.016903 | 0.069796 | 0.887    | 1.17     | 0.808646 | 0.9652   |
| Summary                    | Congenital malformations of the nervous system (HES)                     | T | 378957 | 249    | 378852 | 0.918 | -0.0851  | 0.339739 | 0.472    | 1.79     | 0.802213 | 0.9652   |
| Summary                    | Symptoms nervous and musculoskeletal systems (HES)                       | T | 378957 | 4763   | 374338 | 0.982 | -0.0181  | 0.07517  | 0.848    | 1.14     | 0.809702 | 0.9652   |
| Summary                    | Symptoms cognition perception emotional state (HES)                      | T | 378957 | 8138   | 370963 | 1.01  | 0.013745 | 0.057263 | 0.906    | 1.13     | 0.810303 | 0.9652   |
| Eye                        | Conjunctivitis (HES)                                                     | T | 378957 | 221    | 378880 | 0.914 | -0.0904  | 0.36034  | 0.451    | 1.85     | 0.801903 | 0.9652   |
| Respiratory                | Nasal polyp (HES)                                                        | T | 378957 | 2942   | 376159 | 0.976 | -0.0242  | 0.096413 | 0.808    | 1.18     | 0.801827 | 0.9652   |
| Immuno-inflammation        | Other dermatitis (HES)                                                   | T | 378957 | 1379   | 377722 | 0.968 | -0.03285 | 0.140378 | 0.735    | 1.27     | 0.814951 | 0.9652   |
| Musculoskeletal            | Polyarthrosis (HES)                                                      | T | 378957 | 3571   | 375530 | 0.98  | -0.02057 | 0.087157 | 0.826    | 1.16     | 0.813402 | 0.9652   |
| Genitourinary              | Inflammatory disorders of breast (HES)                                   | T | 378957 | 430    | 378671 | 0.939 | -0.06264 | 0.25511  | 0.57     | 1.55     | 0.806036 | 0.9652   |
| Gynaecology and Obstetrics | Maternal care fetal abnormality and damage (HES)                         | T | 378957 | 238    | 378863 | 0.922 | -0.08074 | 0.341038 | 0.473    | 1.8      | 0.812845 | 0.9652   |
| Symptoms                   | Abnormal involuntary movements (HES)                                     | T | 378957 | 819    | 378282 | 0.956 | -0.04519 | 0.183361 | 0.667    | 1.37     | 0.805344 | 0.9652   |
| Symptoms                   | Symptoms and signs concerning food and fluid intake (HES)                | T | 378957 | 5849   | 373252 | 1.02  | 0.01613  | 0.067062 | 0.891    | 1.16     | 0.80993  | 0.9652   |
| Gynaecology and Obstetrics | Vaginal prolapse colpo-suspension (self-reported)                        | T | 378957 | 3479   | 375622 | 0.979 | -0.02167 | 0.088467 | 0.823    | 1.16     | 0.8065   | 0.9652   |
| Eye                        | Retinal operation vitrectomy (self-reported)                             | T | 378957 | 2253   | 376848 | 0.974 | -0.02651 | 0.109207 | 0.786    | 1.21     | 0.808168 | 0.9652   |
| Operations and Procedures  | Male circumcision (self-reported)                                        | T | 378957 | 3497   | 375604 | 1.02  | 0.020506 | 0.08753  | 0.86     | 1.21     | 0.814771 | 0.9652   |
| Gynaecology and Obstetrics | Ovarian cyst removal surgery (self-reported)                             | T | 378957 | 4517   | 374584 | 0.982 | -0.01864 | 0.077352 | 0.843    | 1.14     | 0.809525 | 0.9652   |
| Operations and Procedures  | Prostate biopsy (self-reported)                                          | T | 378957 | 258    | 378843 | 0.924 | -0.07943 | 0.323119 | 0.49     | 1.74     | 0.805813 | 0.9652   |
| Operations and Procedures  | Other operations on rectum through anus                                  | T | 378957 | 648    | 378453 | 0.952 | -0.049   | 0.204238 | 0.638    | 1.42     | 0.810396 | 0.9652   |
| Operations and Procedures  | Dilation of anal sphincter                                               | T | 378957 | 444    | 378657 | 1.06  | 0.057297 | 0.240841 | 0.661    | 1.7      | 0.811955 | 0.9652   |
| Operations and Procedures  | Urinary diversion                                                        | T | 378957 | 327    | 378774 | 1.07  | 0.069769 | 0.273464 | 0.627    | 1.83     | 0.798621 | 0.9652   |
| Operations and Procedures  | Extirpation of scrotum                                                   | T | 378957 | 239    | 378862 | 1.08  | 0.077638 | 0.323468 | 0.573    | 2.04     | 0.810316 | 0.9652   |
| Operations and Procedures  | Surgical induction of labour                                             | T | 378957 | 2296   | 376805 | 0.974 | -0.02592 | 0.110718 | 0.784    | 1.21     | 0.814894 | 0.9652   |
| Operations and Procedures  | Exploration of other skin of other site                                  | T | 378957 | 4464   | 374637 | 0.981 | -0.01897 | 0.077855 | 0.842    | 1.14     | 0.807494 | 0.9652   |
| Operations and Procedures  | Rehabilitation for musculoskeletal disorders                             | T | 378957 | 364    | 378737 | 1.06  | 0.061768 | 0.255964 | 0.644    | 1.76     | 0.809312 | 0.9652   |
| Operations and Procedures  | Closed reduction of fracture of bone and internal fixation               | T | 378957 | 2838   | 376263 | 0.976 | -0.02452 | 0.097659 | 0.806    | 1.18     | 0.801789 | 0.9652   |
| Operations and Procedures  | Prosthetic replacement of other bone using cement                        | T | 378957 | 559    | 378542 | 1.05  | 0.051737 | 0.208975 | 0.699    | 1.59     | 0.804644 | 0.9652   |
| Operations and Procedures  | Injection of radiocontrast material                                      | T | 378957 | 1644   | 377457 | 1.03  | 0.030272 | 0.125997 | 0.805    | 1.32     | 0.810132 | 0.9652   |
| Operations and Procedures  | Radiotherapy delivery                                                    | T | 378957 | 2124   | 376977 | 0.973 | -0.02778 | 0.111802 | 0.781    | 1.21     | 0.803742 | 0.9652   |
| Operations and Procedures  | Laser therapy to organ NOC                                               | T | 378957 | 2987   | 376114 | 0.978 | -0.02231 | 0.094785 | 0.812    | 1.18     | 0.813957 | 0.9652   |
| Operations and Procedures  | Introduction of non removable material into organ NOC                    | T | 378957 | 611    | 378490 | 0.95  | -0.051   | 0.212925 | 0.626    | 1.44     | 0.810707 | 0.9652   |
| Digestive system           | Hepatitis (HES and self-reported)                                        | T | 378957 | 1662   | 377439 | 1.03  | 0.0312   | 0.125058 | 0.807    | 1.32     | 0.802987 | 0.9652   |
| Genitourinary              | Urinary frequency incontinence (HES and self-reported)                   | T | 378957 | 11734  | 367367 | 1.01  | 0.011688 | 0.047861 | 0.921    | 1.11     | 0.807073 | 0.9652   |
| ENT                        | Menieres disease (HES and self-reported)                                 | T | 378957 | 1305   | 377796 | 1.04  | 0.034761 | 0.13933  | 0.788    | 1.36     | 0.802981 | 0.9652   |
| Musculoskeletal            | Plantar fasciitis (HES and self-reported)                                | T | 378957 | 448    | 378653 | 1.06  | 0.057064 | 0.234671 | 0.668    | 1.68     | 0.807877 | 0.9652   |
| Cardiovascular             | Mitral regurgitation incompetence (HES and self-reported)                | T | 378957 | 2024   | 377077 | 0.973 | -0.02755 | 0.115254 | 0.776    | 1.22     | 0.81109  | 0.9652   |
| Other                      | Daytime dozing sleeping narcolepsy                                       | T | 377408 | NA     | NA     | NA    | 0.00203  | 0.008315 | -0.01427 | 0.018328 | 0.80715  | 0.9652   |
| Biological assays          | Eosinophil percentage                                                    | T | 367073 | NA     | NA     | NA    | -0.002   | 0.008444 | -0.01855 | 0.014552 | 0.812982 | 0.9652   |
| Cancer                     | Mal neo rectosigmoid (cancer register)                                   | T | 378957 | 343    | 378758 | 0.936 | -0.06589 | 0.283046 | 0.538    | 1.63     | 0.815925 | 0.965879 |
| Genitourinary              | Prostatitis (HES and self-reported)                                      | T | 378957 | 1555   | 377546 | 0.97  | -0.03068 | 0.132459 | 0.748    | 1.26     | 0.816852 | 0.966501 |
| Gynaecology and Obstetrics | Single spontaneous delivery (HES)                                        | T | 378957 | 1836   | 377265 | 1.03  | 0.027535 | 0.119818 | 0.813    | 1.3      | 0.81824  | 0.967478 |
| Symptoms                   | Abnormal blood pressure reading without diagnosis (HES)                  | T | 378957 | 2292   | 376809 | 1.02  | 0.024117 | 0.105756 | 0.833    | 1.26     | 0.819613 | 0.967478 |
| Operations and Procedures  | Fixation of retina                                                       | T | 378957 | 1034   | 378067 | 1.04  | 0.035198 | 0.154414 | 0.765    | 1.4      | 0.819686 | 0.967478 |
| Operations and Procedures  | Excision of pilonidal sinus                                              | T | 378957 | 253    | 378848 | 0.925 | -0.07773 | 0.339738 | 0.475    | 1.8      | 0.819019 | 0.967478 |
| Operations and Procedures  | Harvest of skin for graft                                                | T | 378957 | 2280   | 376821 | 1.02  | 0.02425  | 0.105806 | 0.833    | 1.26     | 0.818722 | 0.967478 |
| Operations and Procedures  | Other operations on internal nose                                        | T | 378957 | 2843   | 376258 | 1.02  | 0.021803 | 0.096073 | 0.847    | 1.23     | 0.82047  | 0.96793  |
| Operations and Procedures  | Excision of lesion of anus                                               | T | 378957 | 2708   | 376393 | 0.978 | -0.02252 | 0.099913 | 0.804    | 1.19     | 0.821676 | 0.968484 |
| ENT                        | Throat or larynx disorder (HES and self-reported)                        | T | 378957 | 3484   | 375617 | 0.98  | -0.01995 | 0.08853  | 0.824    | 1.17     | 0.821744 | 0.968484 |
| Genitourinary              | Other disorders of penis (HES)                                           | T | 378957 | 1896   | 377205 | 1.03  | 0.026298 | 0.11708  | 0.816    | 1.29     | 0.822279 | 0.968641 |
| Eye                        | Blindness and low vision (HES)                                           | T | 378957 | 805    | 378296 | 1.04  | 0.038139 | 0.178045 | 0.733    | 1.47     | 0.830386 | 0.971371 |
| Respiratory                | Chronic chinitis nasopharyngitis and pharyngitis (HES)                   | T | 378957 | 770    | 378331 | 0.96  | -0.04083 | 0.189544 | 0.662    | 1.39     | 0.829428 | 0.971371 |
| Respiratory                | Other chronic obstructive pulmonary disease (HES)                        | T | 378957 | 7608   | 371493 | 1.01  | 0.012753 | 0.059627 | 0.901    | 1.14     | 0.830645 | 0.971371 |
| Digestive system           | Other diseases of appendix (HES)                                         | T | 378957 | 242    | 378859 | 0.928 | -0.07425 | 0.339915 | 0.477    | 1.81     | 0.827083 | 0.971371 |
| Genitourinary              | Other congenital malformations of kidney (HES)                           | T | 378957 | 214    | 378887 | 0.926 | -0.07715 | 0.360552 | 0.457    | 1.88     | 0.830565 | 0.971371 |
| ENT                        | Ear surgery (self-reported)                                              | T | 378957 | 6011   | 373090 | 1.01  | 0.014546 | 0.06631  | 0.891    | 1.16     | 0.826369 | 0.971371 |
| Operations and Procedures  | Total excision of colon and rectum                                       | T | 378957 | 212    | 378889 | 1.08  | 0.073025 | 0.340854 | 0.552    | 2.1      | 0.830359 | 0.971371 |
| Operations and Procedures  | Excision of bone                                                         | T | 378957 | 3651   | 375450 | 1.02  | 0.018185 | 0.084374 | 0.863    | 1.2      | 0.829352 | 0.971371 |
| Operations and Procedures  | Other operations on tendon                                               | T | 378957 | 780    | 378321 | 0.96  | -0.04037 | 0.186449 | 0.666    | 1.38     | 0.828564 | 0.971371 |
| Operations and Procedures  | Other total prosthetic replacement of hip joint                          | T | 378957 | 1064   | 378037 | 0.966 | -0.03482 | 0.157848 | 0.709    | 1.32     | 0.825426 | 0.971371 |
| Operations and Procedures  | Approach through thoracic cavity                                         | T | 378957 | 602    | 378499 | 0.955 | -0.0461  | 0.212903 | 0.629    | 1.45     | 0.828563 | 0.971371 |
| ENT                        | Dentures                                                                 | T | 377502 | 63135  | 314511 | 0.995 | -0.00514 | 0.023401 | 0.95     | 1.04     | 0.826112 | 0.971371 |
| Eye                        | Glaucoma (HES and self-reported)                                         | T | 378957 | 6262   | 372839 | 0.986 | -0.01424 | 0.065242 | 0.868    | 1.12     | 0.827164 | 0.971371 |
| Neurosciences              | Fluid intelligence score                                                 | T | 184451 | NA     | NA     | NA    | 0.002543 | 0.011757 | -0.0205  | 0.025587 | 0.828735 | 0.971371 |
| Biological assays          | Potassium in urine                                                       | T | 367300 | NA     | NA     | NA    | -0.00182 | 0.008452 | -0.01839 | 0.014743 | 0.829212 | 0.971371 |
| Summary                    | Noninflammatory disorders of female genital tract (HES)                  | T | 378957 | 43955  | 335146 | 1.01  | 0.005846 | 0.027441 | 0.953    | 1.06     | 0.8313   | 0.971665 |
| Symptoms                   | Signs involving the nervous and musculoskeletal systems (HES)            | T | 378957 | 2611   | 376490 | 1.02  | 0.021051 | 0.099168 | 0.841    | 1.24     | 0.831894 | 0.971888 |
| Eye                        | Hordeolum and chalazion (HES)                                            | T | 378957 | 1665   | 377436 | 0.973 | -0.027   | 0.127797 | 0.758    | 1.25     | 0.832702 | 0.971889 |
| Haematology                | Myeloproliferative disorder (HES and self-reported)                      | T | 378957 | 455    | 378646 | 1.05  | 0.04958  | 0.234689 | 0.663    | 1.66     | 0.832685 | 0.971889 |
| Musculoskeletal            | Other osteochondropathies (HES)                                          | T | 378957 | 239    | 378862 | 0.931 | -0.07103 | 0.34003  | 0.478    | 1.81     | 0.834531 | 0.97214  |
| Genitourinary              | Unspecified nephritic syndrome (HES)                                     | T | 378957 | 244    | 378857 | 0.931 | -0.07135 | 0.339873 | 0.478    | 1.81     | 0.833711 | 0.97214  |
| ENT                        | Hearing difficulty problems with background noise                        | T | 371341 | 140624 | 230856 | 1     | 0.003673 | 0.017558 | 0.97     | 1.04     | 0.834277 | 0.97214  |
| Operations and Procedures  | Vaginal excision of uterus                                               | T | 378957 | 4716   | 374385 | 1.02  | 0.015632 | 0.074643 | 0.878    | 1.18     | 0.834117 | 0.97214  |
| Medication                 | Other beta lactam antibacterials                                         | T | 378957 | 374    | 378727 | 0.945 | -0.05678 | 0.272697 | 0.554    | 1.61     | 0.835057 | 0.972282 |
| Respiratory                | Pneumonia organism unspecified (HES)                                     | T | 378957 | 8203   | 378098 | 0.988 | -0.01182 | 0.057505 | 0.883    | 1.11     | 0.837091 | 0.973236 |
| Gynaecology and Obstetrics | Sterilisation (self-reported)                                            | T | 378957 | 16084  | 363017 | 1.01  | 0.008549 | 0.041751 | 0.929    | 1.09     | 0.837756 | 0.973236 |
| Operations and Procedures  | Fixation of bone of face                                                 | T | 378957 | 219    | 378882 | 1.07  | 0.069643 | 0.340675 | 0.55     | 2.09     | 0.838021 | 0.973236 |
| Metabolic                  | Parathyroid hyperplasia/adenoma (HES and self-reported)                  | T | 378957 | 419    | 378682 | 0.949 | -0.05249 | 0.255217 | 0.575    | 1.56     | 0.837059 | 0.973236 |
| Musculoskeletal            | Giant celltemporal arteritis (HES and self-reported)                     | T | 378957 | 395    | 378706 | 0.948 | -0.05379 | 0.263806 | 0.565    | 1.59     | 0.8383   | 0.973236 |
| Genitourinary              | Diabetic nephropathy (HES and self-reported)                             | T | 378957 | 242    | 378859 | 0.933 | -0       |          |          |          |          |          |

|                            |                                                                     |   |        |       |        |       |          |          |          |          |          |          |
|----------------------------|---------------------------------------------------------------------|---|--------|-------|--------|-------|----------|----------|----------|----------|----------|----------|
| Operations and Procedures  | Recession of muscle of eye                                          | T | 378957 | 270   | 378831 | 0.941 | -0.06065 | 0.322482 | 0.5      | 1.77     | 0.85082  | 0.975807 |
| Operations and Procedures  | Diagnostic fiberoptic endoscopic examination of oesophagus          | T | 378957 | 1468  | 376733 | 0.976 | -0.02403 | 0.135432 | 0.749    | 1.27     | 0.859148 | 0.975807 |
| Operations and Procedures  | Therapeutic fiberoptic gastrointestinal tract                       | T | 378957 | 1244  | 378857 | 0.973 | -0.02737 | 0.147545 | 0.729    | 1.3      | 0.852282 | 0.975807 |
| Operations and Procedures  | Other open operations on other artery                               | T | 378957 | 320   | 378781 | 0.944 | -0.05786 | 0.294472 | 0.53     | 1.68     | 0.844239 | 0.975807 |
| Operations and Procedures  | Diagnostic transluminal operations on other artery                  | T | 378957 | 397   | 378704 | 1.05  | 0.045669 | 0.255503 | 0.634    | 1.73     | 0.858141 | 0.975807 |
| Operations and Procedures  | Total excision of kidney                                            | T | 378957 | 1063  | 378038 | 0.97  | -0.03092 | 0.159595 | 0.709    | 1.33     | 0.846358 | 0.975807 |
| Operations and Procedures  | Diagnostic endoscopic examination of ureter                         | T | 378957 | 1627  | 374774 | 0.977 | -0.0237  | 0.128852 | 0.759    | 1.26     | 0.85409  | 0.975807 |
| Operations and Procedures  | Therapeutic endoscopic operations on pleura                         | T | 378957 | 310   | 378791 | 1.06  | 0.053653 | 0.283639 | 0.605    | 1.84     | 0.849968 | 0.975807 |
| Operations and Procedures  | Complex reconstruction of forefoot                                  | T | 378957 | 800   | 378301 | 0.966 | -0.03471 | 0.183553 | 0.674    | 1.38     | 0.850015 | 0.975807 |
| Operations and Procedures  | External resuscitation                                              | T | 378957 | 3496  | 375605 | 1.02  | 0.016051 | 0.086209 | 0.858    | 1.2      | 0.852297 | 0.975807 |
| Operations and Procedures  | Cytology of organ NOC                                               | T | 378957 | 2554  | 376547 | 0.981 | -0.01926 | 0.102928 | 0.802    | 1.2      | 0.851543 | 0.975807 |
| Mental health              | Ever unenthusiastic disinterested for a whole week                  | T | 121342 | 44857 | 76548  | 0.994 | -0.00575 | 0.030485 | 0.937    | 1.06     | 0.85038  | 0.975807 |
| Medication                 | Zinc                                                                | T | 377706 | 15460 | 362390 | 0.993 | -0.0075  | 0.042171 | 0.914    | 1.08     | 0.858665 | 0.975807 |
| Metabolic                  | Disorder of pituitary gland (HES and self-reported)                 | T | 378957 | 409   | 378692 | 1.05  | 0.047435 | 0.247946 | 0.645    | 1.7      | 0.848283 | 0.975807 |
| Digestive system           | Duodenal ulcer (HES and self-reported)                              | T | 378957 | 4066  | 375035 | 1.02  | 0.015891 | 0.081068 | 0.867    | 1.19     | 0.844597 | 0.975807 |
| Immuno-inflammation        | Lichen sclerosus (HES and self-reported)                            | T | 378957 | 542   | 378559 | 0.96  | -0.04109 | 0.222918 | 0.62     | 1.49     | 0.853745 | 0.975807 |
| Infectious disease         | Rubella german measles (HES and self-reported)                      | T | 378957 | 452   | 378649 | 0.957 | -0.04405 | 0.240798 | 0.597    | 1.53     | 0.854847 | 0.975807 |
| Cardiovascular             | Cardiac index during PWA                                            | T | 7999   | NA    | NA     | NA    | -0.01144 | 0.059948 | -0.12894 | 0.106056 | 0.848633 | 0.975807 |
| Haematology                | Vitamin B12 deficiency anaemia (HES)                                | T | 378957 | 809   | 378292 | 1.03  | 0.031107 | 0.178047 | 0.728    | 1.46     | 0.861308 | 0.977339 |
| Haematology                | Other coagulation defects (HES)                                     | T | 378957 | 874   | 378227 | 1.03  | 0.029809 | 0.170477 | 0.738    | 1.44     | 0.861193 | 0.977339 |
| Summary                    | Other and unspecified disorders of the circulatory system (HES)     | T | 378957 | 4939  | 374162 | 0.987 | -0.01278 | 0.073699 | 0.855    | 1.14     | 0.862729 | 0.977543 |
| Cardiovascular             | Varicose ulcer (HES and self-reported)                              | T | 378957 | 232   | 378869 | 0.943 | -0.05901 | 0.340233 | 0.484    | 1.84     | 0.862299 | 0.977543 |
| Symptoms                   | Nausea and vomiting (HES)                                           | T | 378957 | 10633 | 368468 | 0.991 | -0.00869 | 0.050798 | 0.897    | 1.1      | 0.86419  | 0.979226 |
| Summary                    | Visual disturbances and blindness (HES)                             | T | 378957 | 3428  | 375673 | 1.01  | 0.014786 | 0.087342 | 0.855    | 1.2      | 0.865573 | 0.979527 |
| Operations and Procedures  | Other urological surgery (self-reported)                            | T | 378957 | 990   | 378111 | 0.972 | -0.02814 | 0.16572  | 0.703    | 1.35     | 0.865187 | 0.979527 |
| Operations and Procedures  | Laparoscopy (self-reported)                                         | T | 378957 | 6734  | 372367 | 0.989 | -0.01074 | 0.063657 | 0.873    | 1.12     | 0.86599  | 0.979527 |
| Operations and Procedures  | Delivery of chemotherapy for neoplasm                               | T | 378957 | 7579  | 371522 | 1.01  | 0.009917 | 0.05899  | 0.9      | 1.13     | 0.866489 | 0.979527 |
| Cardiovascular             | LV ejection fraction                                                | T | 3764   | NA    | NA     | NA    | 0.015104 | 0.089733 | -0.16077 | 0.190979 | 0.866334 | 0.979527 |
| Immuno-inflammation        | Dermatitis due to substances taken internally (HES)                 | T | 378957 | 436   | 378665 | 1.04  | 0.040154 | 0.240942 | 0.649    | 1.67     | 0.867642 | 0.979911 |
| Operations and Procedures  | Other operations on heart                                           | T | 378957 | 733   | 378368 | 1.03  | 0.031165 | 0.186697 | 0.716    | 1.49     | 0.867427 | 0.979911 |
| Cardiovascular             | Diseases of capillaries (HES)                                       | T | 378957 | 604   | 378497 | 0.965 | -0.03516 | 0.212846 | 0.636    | 1.47     | 0.868789 | 0.980746 |
| Medication                 | Antipsoriatics for topical use                                      | T | 378957 | 1197  | 377904 | 1.02  | 0.023783 | 0.147664 | 0.767    | 1.37     | 0.872026 | 0.981755 |
| Operations and Procedures  | Total prosthetic knee joint not using cement                        | T | 378957 | 695   | 378406 | 1.03  | 0.030811 | 0.190054 | 0.711    | 1.5      | 0.871215 | 0.981755 |
| Eye                        | Ever had eye surgery                                                | T | 84638  | 6217  | 78456  | 0.989 | -0.01087 | 0.06688  | 0.868    | 1.13     | 0.870906 | 0.981755 |
| Mental health              | Mani/bipolar disorder/mania depression (HES and self-reported)      | T | 378957 | 1595  | 375506 | 1.02  | 0.020588 | 0.127911 | 0.794    | 1.31     | 0.871218 | 0.981755 |
| Musculoskeletal            | Fracture clavicle collar bone (HES and self-reported)               | T | 378957 | 1092  | 378009 | 0.975 | -0.0255  | 0.157712 | 0.716    | 1.33     | 0.871549 | 0.981755 |
| Eye                        | LogMAR final left                                                   | T | 83932  | NA    | NA     | NA    | -0.00281 | 0.017453 | -0.03702 | 0.031394 | 0.8719   | 0.981755 |
| Cardiovascular             | Cerebral aneurysm (HES and self-reported)                           | T | 378957 | 545   | 378556 | 1.04  | 0.034781 | 0.217897 | 0.676    | 1.59     | 0.873179 | 0.982479 |
| Musculoskeletal            | Spontaneous rupture of synovium and tendon (HES)                    | T | 378957 | 488   | 378613 | 0.964 | -0.03704 | 0.234263 | 0.609    | 1.53     | 0.874382 | 0.983374 |
| Medication                 | Other mineral supplements                                           | T | 378957 | 878   | 378223 | 0.973 | -0.02737 | 0.175286 | 0.69     | 1.37     | 0.875922 | 0.984442 |
| Musculoskeletal            | Rheumatoid arthritis (HES and self-reported)                        | T | 378957 | 6232  | 372869 | 0.99  | -0.01026 | 0.06586  | 0.87     | 1.13     | 0.876149 | 0.984442 |
| Cardiovascular             | Other arterial surgery revascularisation procedures (self-reported) | T | 378957 | 268   | 378833 | 0.952 | -0.0496  | 0.32252  | 0.506    | 1.79     | 0.877783 | 0.9849   |
| Operations and Procedures  | Opening of skin                                                     | T | 378957 | 3649  | 375452 | 0.987 | -0.01327 | 0.086046 | 0.834    | 1.17     | 0.877462 | 0.9849   |
| Cardiovascular             | Cardiomyopathy (HES and self-reported)                              | T | 378957 | 1272  | 37829  | 0.978 | -0.02227 | 0.144659 | 0.737    | 1.3      | 0.877658 | 0.9849   |
| Genitourinary              | Cystitis (HES)                                                      | T | 378957 | 2647  | 376454 | 0.985 | -0.01518 | 0.100966 | 0.808    | 1.2      | 0.880504 | 0.985821 |
| Gynaecology and Obstetrics | Maternal care for known or suspected malpresentation of fetus (HES) | T | 378957 | 990   | 378111 | 0.976 | -0.02477 | 0.164038 | 0.707    | 1.35     | 0.879966 | 0.985821 |
| Operations and Procedures  | Other operations on nail                                            | T | 378957 | 396   | 378705 | 1.04  | 0.03825  | 0.255439 | 0.63     | 1.71     | 0.880967 | 0.985821 |
| Neurosciences              | Chronic degenerative neurological problem (HES and self-reported)   | T | 378957 | 4087  | 375014 | 1.01  | 0.012176 | 0.08     | 0.865    | 1.18     | 0.879033 | 0.985821 |
| Musculoskeletal            | Fracture skull head (HES and self-reported)                         | T | 378957 | 2136  | 376965 | 0.983 | -0.01702 | 0.113026 | 0.788    | 1.23     | 0.880287 | 0.985821 |
| Respiratory                | FEV1 FVC ratio ever smoked only strict                              | T | 136671 | NA    | NA     | NA    | -0.00208 | 0.013909 | -0.02934 | 0.02518  | 0.88106  | 0.985821 |
| Operations and Procedures  | Extirpation of lesion of meninges of brain                          | T | 378957 | 289   | 378812 | 0.955 | -0.04581 | 0.307654 | 0.523    | 1.75     | 0.881623 | 0.985993 |
| Operations and Procedures  | Therapeutic endoscopic operations on ovary                          | T | 378957 | 717   | 378384 | 0.972 | -0.02868 | 0.193502 | 0.665    | 1.42     | 0.882189 | 0.986094 |
| Gynaecology and Obstetrics | Abnormal smear cervix (HES and self-reported)                       | T | 378957 | 1903  | 377198 | 1.02  | 0.017191 | 0.11634  | 0.81     | 1.28     | 0.882532 | 0.986094 |
| Medication                 | Bile therapy                                                        | T | 378957 | 233   | 378868 | 0.96  | -0.04111 | 0.340233 | 0.493    | 1.87     | 0.903829 | 0.98634  |
| Medication                 | Other agents acting on the renin angiotensin system                 | T | 378957 | 16224 | 362877 | 0.994 | -0.00561 | 0.041561 | 0.917    | 1.08     | 0.892561 | 0.98634  |
| Medication                 | Antiseptics and disinfectants                                       | T | 378957 | 239   | 378862 | 0.954 | -0.04686 | 0.340017 | 0.49     | 1.86     | 0.89039  | 0.98634  |
| Summary                    | Episodic and paroxysmal disorders (HES)                             | T | 378957 | 12991 | 366110 | 0.994 | -0.00651 | 0.045976 | 0.908    | 1.09     | 0.887481 | 0.98634  |
| Summary                    | Disorders of eyelid lacrimal system and orbit (HES)                 | T | 378957 | 8748  | 370353 | 0.993 | -0.00752 | 0.055606 | 0.89     | 1.11     | 0.892389 | 0.98634  |
| Summary                    | Other acute lower respiratory infections (HES)                      | T | 378957 | 7023  | 372078 | 1.01  | 0.007501 | 0.061692 | 0.893    | 1.14     | 0.903225 | 0.98634  |
| Summary                    | Infections of the skin and subcutaneous tissue (HES)                | T | 378957 | 9696  | 369405 | 0.993 | -0.00725 | 0.053019 | 0.895    | 1.1      | 0.891307 | 0.98634  |
| Metabolic                  | Disorders of porphyrin and bilirubin metabolism (HES)               | T | 378957 | 367   | 378734 | 0.967 | -0.03314 | 0.272771 | 0.567    | 1.65     | 0.90331  | 0.98634  |
| Neurosciences              | Other degenerative diseases of nervous system (HES)                 | T | 378957 | 567   | 378534 | 0.971 | -0.02909 | 0.217776 | 0.634    | 1.49     | 0.893748 | 0.98634  |
| ENT                        | Other disorders of ear (HES)                                        | T | 378957 | 566   | 378535 | 1.03  | 0.027551 | 0.213133 | 0.677    | 1.56     | 0.897148 | 0.98634  |
| Cardiovascular             | Subsequent myocardial infarction (HES)                              | T | 378957 | 663   | 378438 | 1.03  | 0.025302 | 0.196975 | 0.697    | 1.51     | 0.897792 | 0.98634  |
| Cardiovascular             | Endocarditis valve unspecified (HES)                                | T | 378957 | 363   | 378738 | 0.962 | -0.03854 | 0.272856 | 0.564    | 1.64     | 0.887686 | 0.98634  |
| Digestive system           | Ulcerative colitis (HES)                                            | T | 378957 | 2940  | 376161 | 0.989 | -0.01155 | 0.095533 | 0.82     | 1.19     | 0.903776 | 0.98634  |
| Musculoskeletal            | Postprocedural musculoskeletal disorders (HES)                      | T | 378957 | 412   | 378689 | 1.03  | 0.030481 | 0.24793  | 0.634    | 1.68     | 0.902153 | 0.98634  |
| Gynaecology and Obstetrics | Obstructed labour malpresentation of fetus (HES)                    | T | 378957 | 382   | 378719 | 0.963 | -0.03761 | 0.26512  | 0.573    | 1.62     | 0.887199 | 0.98634  |
| Symptoms                   | Other skin changes (HES)                                            | T | 378957 | 565   | 378536 | 1.03  | 0.02914  | 0.213143 | 0.676    | 1.56     | 0.903232 | 0.98634  |
| Symptoms                   | Abnormal findings in specimens from female genital organs (HES)     | T | 378957 | 1312  | 377789 | 1.02  | 0.019136 | 0.139568 | 0.775    | 1.34     | 0.890946 | 0.98634  |
| Medication                 | Sulfonamides and trimethoprim                                       | T | 378957 | 595   | 378506 | 0.971 | -0.02927 | 0.212914 | 0.64     | 1.47     | 0.890641 | 0.98634  |
| Medication                 | Hormone antagonists and related agents                              | T | 378957 | 2999  | 376102 | 1.01  | 0.01291  | 0.093154 | 0.844    | 1.22     | 0.889776 | 0.98634  |
| Medication                 | Antitubercular preparations                                         | T | 378957 | 4574  | 374527 | 0.989 | -0.01081 | 0.077135 | 0.85     | 1.15     | 0.888523 | 0.98634  |
| Medication                 | Chapter p Chapter X Diseases of the respiratory system BIN (HES)    | T | 378957 | 9049  | 370052 | 0.993 | -0.00698 | 0.054877 | 0.892    | 1.11     | 0.889762 | 0.98634  |
| Operations and Procedures  | Umbilical hernia repair (self-reported)                             | T | 378957 | 3357  | 375744 | 0.988 | -0.01256 | 0.089279 | 0.829    | 1.18     | 0.88811  | 0.98634  |
| Operations and Procedures  | Anal surgery (self-reported)                                        | T | 378957 | 2357  | 376744 | 1.01  | 0.013654 | 0.105125 | 0.825    | 1.25     | 0.896657 | 0.98634  |
| Operations and Procedures  | Laparotomy nos (self-reported)                                      | T | 378957 | 2106  | 376995 | 1.01  | 0.013537 | 0.111117 | 0.815    | 1.26     | 0.903035 | 0.98634  |
| Operations and Procedures  | Inguinal hernia repair (self-reported)                              | T | 378957 | 5531  | 373570 | 1.01  | 0.009895 | 0.068965 | 0.882    | 1.16     | 0.885916 | 0.98634  |
| Operations and Procedures  | Orchidopexy (self-reported)                                         | T | 378957 | 293   | 378808 | 0.962 | -0.03837 | 0.307742 | 0.526    | 1.76     | 0.900786 | 0.98634  |
| Family history             | Parkinson s disease (family history - sibling)                      | T | 301109 | 1576  | 299660 | 1.02  | 0.018105 | 0.127286 | 0.793    | 1.31     | 0.886892 | 0.98634  |
| Mental health              | Bipolar I Disorder                                                  | T | 91467  | 595   | 90920  | 0.97  | -0.03087 | 0.213524 | 0.638    | 1.47     | 0.885039 | 0.98634  |
| Cancer                     | Neo of urinary organs (cancer register)                             | T | 378957 | 723   | 378378 | 1.03  | 0.027067 | 0.186893 | 0.712    | 1.48     | 0.884847 | 0.98634  |
| Summary                    | Mal neo of thyroid and other endocrine glands (cancer register)     | T | 378957 | 468   | 378633 | 0.967 | -0.03304 | 0.240613 | 0.604    | 1.55     | 0.890767 | 0.98634  |
| Operations and Procedures  | Other operations on lacrimal apparatus                              | T | 378957 | 939   | 378162 | 0.98  | -0.02071 | 0.168074 | 0.705    | 1.36     | 0.901942 | 0.98634  |
| Operations and Procedures  | Incision of sclera                                                  | T | 378957 | 216   | 378885 | 1.05  | 0.044599 | 0.34082  | 0.536    | 2.04     | 0.895887 | 0.98634  |
| Operations and Procedures  | Microtherapeutic endoscopic operations on larynx                    | T | 378957 | 579   | 378522 | 0.972 | -0.02851 | 0.21762  | 0.634    | 1.49     | 0.895756 | 0.98634  |
| Operations and Procedures  | Diagnostic endoscopic examination of larynx                         | T | 378957 | 3294  | 375807 | 0.988 | -0.01206 | 0.090625 | 0.827    | 1.18     | 0.894104 | 0.98634  |
| Operations and Procedures  | Surgical removal of tooth                                           | T | 378957 | 5408  | 373693 | 0.991 | -0.00807 | 0.07063  | 0.863    | 1.14     | 0.901937 | 0.98634  |
| Operations and Procedures  | Emergency excision                                                  |   |        |       |        |       |          |          |          |          |          |          |

|                            |                                                                     |   |        |       |        |       |          |          |          |          |          |          |
|----------------------------|---------------------------------------------------------------------|---|--------|-------|--------|-------|----------|----------|----------|----------|----------|----------|
| Musculoskeletal            | Pyogenic arthritis (HES)                                            | T | 378957 | 335   | 378766 | 0.97  | -0.03028 | 0.28314  | 0.557    | 1.69     | 0.914833 | 0.987823 |
| Medication                 | Expectorants excl combinations with cough suppressants              | T | 378957 | 1117  | 377984 | 0.983 | -0.01719 | 0.155941 | 0.724    | 1.33     | 0.912207 | 0.987823 |
| Gynaecology and Obstetrics | Hysterectomy with oophorectomy (self-reported)                      | T | 378957 | 668   | 378433 | 1.02  | 0.021349 | 0.196978 | 0.694    | 1.5      | 0.916691 | 0.987823 |
| Gynaecology and Obstetrics | Intrauterine contraceptive device insertion removal (self-reported) | T | 378957 | 624   | 378477 | 0.978 | -0.0226  | 0.204647 | 0.655    | 1.46     | 0.912074 | 0.987823 |
| Operations and Procedures  | Excision of cervix uteri                                            | T | 378957 | 3167  | 375934 | 0.99  | -0.01002 | 0.091673 | 0.827    | 1.18     | 0.912927 | 0.987823 |
| Operations and Procedures  | Reduction of fracture of other bone of face                         | T | 378957 | 686   | 378415 | 1.02  | 0.021042 | 0.196672 | 0.695    | 1.5      | 0.914796 | 0.987823 |
| Operations and Procedures  | Other destruction of organ NOC                                      | T | 378957 | 2176  | 376925 | 0.988 | -0.01187 | 0.110415 | 0.796    | 1.23     | 0.913463 | 0.987823 |
| Immuno-inflammation        | Allergy or anaphylactic reaction to food (HES and self-reported)    | T | 378957 | 1833  | 377268 | 1.01  | 0.012876 | 0.11903  | 0.802    | 1.28     | 0.91386  | 0.987823 |
| Gynaecology and Obstetrics | Female infertility (HES and self-reported)                          | T | 378957 | 1328  | 377773 | 1.02  | 0.015452 | 0.140173 | 0.772    | 1.34     | 0.912225 | 0.987823 |
| Cardiovascular             | Hypertrophic cardiomyopathy hcm hcm (HES and self-reported)         | T | 378957 | 265   | 378836 | 1.04  | 0.034847 | 0.308225 | 0.566    | 1.89     | 0.90985  | 0.987823 |
| Cardiovascular             | P duration                                                          | T | 8938   | NA    | NA     | NA    | 0.006255 | 0.057058 | -0.10558 | 0.11809  | 0.912705 | 0.987823 |
| Gynaecology and Obstetrics | Multiple gestation (HES)                                            | T | 378957 | 258   | 378843 | 1.03  | 0.032816 | 0.309643 | 0.563    | 1.9      | 0.915599 | 0.987823 |
| Summary                    | Benign neo (cancer register)                                        | T | 378957 | 784   | 378317 | 0.981 | -0.01931 | 0.183531 | 0.685    | 1.41     | 0.916211 | 0.987823 |
| Neurosciences              | Pain all over the body                                              | T | 378957 | 5847  | 372384 | 0.993 | -0.00717 | 0.067985 | 0.869    | 1.13     | 0.915994 | 0.987823 |
| Symptoms                   | Rash and other nonspecific skin eruption (HES)                      | T | 378957 | 1635  | 374666 | 0.987 | -0.01333 | 0.12785  | 0.768    | 1.27     | 0.916948 | 0.988335 |
| Operations and Procedures  | Harvest of flap of skin and fascia                                  | T | 378957 | 546   | 378555 | 1.02  | 0.022555 | 0.217862 | 0.667    | 1.57     | 0.917542 | 0.988335 |
| Respiratory                | Status asthmaticus (HES)                                            | T | 378957 | 233   | 378868 | 0.966 | -0.03442 | 0.340185 | 0.496    | 1.88     | 0.919402 | 0.988551 |
| Gynaecology and Obstetrics | Coronary angiogram (self-reported)                                  | T | 378957 | 2517  | 376584 | 1.01  | 0.010367 | 0.10217  | 0.827    | 1.23     | 0.919179 | 0.988551 |
| Cancer                     | Mal neo cervix uteri (cancer register)                              | T | 378957 | 384   | 378717 | 0.973 | -0.02715 | 0.263748 | 0.58     | 1.63     | 0.91802  | 0.988551 |
| Gynaecology and Obstetrics | Cervical erosion (HES and self-reported)                            | T | 378957 | 898   | 378203 | 0.983 | -0.01723 | 0.170753 | 0.703    | 1.37     | 0.919611 | 0.988551 |
| Neurosciences              | Number of incorrect matches in round                                | T | 93547  | NA    | NA     | NA    | 0.00167  | 0.016368 | -0.03041 | 0.033751 | 0.918729 | 0.988551 |
| Medication                 | Antihypertensives and diuretics in combination                      | T | 378957 | 1142  | 377959 | 1.01  | 0.014457 | 0.150846 | 0.755    | 1.36     | 0.923646 | 0.988791 |
| Summary                    | Polyneuropathies and peripheral nervous system (HES)                | T | 378957 | 1669  | 377432 | 0.989 | -0.01104 | 0.125976 | 0.773    | 1.27     | 0.930196 | 0.988791 |
| Summary                    | Other disorders of ear (HES)                                        | T | 378957 | 4112  | 374989 | 0.992 | -0.0079  | 0.080459 | 0.847    | 1.16     | 0.92179  | 0.988791 |
| Summary                    | Chondropathies (HES)                                                | T | 378957 | 1094  | 378007 | 0.985 | -0.01472 | 0.155856 | 0.726    | 1.34     | 0.924745 | 0.988791 |
| ENT                        | Other disorders of external ear (HES)                               | T | 378957 | 883   | 378218 | 0.985 | -0.01504 | 0.172769 | 0.702    | 1.38     | 0.930643 | 0.988791 |
| Immuno-inflammation        | Pilonidal cyst (HES)                                                | T | 378957 | 452   | 378649 | 0.978 | -0.0225  | 0.247574 | 0.602    | 1.59     | 0.927597 | 0.988791 |
| Musculoskeletal            | Osteoporosis with pathological fracture (HES)                       | T | 378957 | 834   | 378267 | 1.02  | 0.016587 | 0.17546  | 0.721    | 1.43     | 0.924686 | 0.988791 |
| Genitourinary              | Obstructive and reflux uropathy (HES)                               | T | 378957 | 2412  | 376689 | 0.991 | -0.00933 | 0.105106 | 0.806    | 1.22     | 0.929301 | 0.988791 |
| Gynaecology and Obstetrics | Excessive vomiting in pregnancy (HES)                               | T | 378957 | 202   | 378899 | 0.965 | -0.03521 | 0.362019 | 0.475    | 1.96     | 0.922523 | 0.988791 |
| Operations and Procedures  | Testicular scrotal operation (self-reported)                        | T | 378957 | 2430  | 376671 | 0.99  | -0.0104  | 0.10602  | 0.804    | 1.22     | 0.921888 | 0.988791 |
| Cancer                     | Follicular (cancer register)                                        | T | 378957 | 389   | 378712 | 1.02  | 0.024253 | 0.255577 | 0.621    | 1.69     | 0.924399 | 0.988791 |
| Cancer                     | Carc in situ of breast (cancer register)                            | T | 378957 | 1900  | 377201 | 1.01  | 0.010787 | 0.11699  | 0.804    | 1.27     | 0.926539 | 0.988791 |
| Operations and Procedures  | Diagnostic retrograde exam pancreatic duct                          | T | 378957 | 208   | 378893 | 0.969 | -0.03109 | 0.360809 | 0.478    | 1.97     | 0.931327 | 0.988791 |
| Operations and Procedures  | Diagnostic imaging of heart                                         | T | 378957 | 1244  | 377857 | 0.987 | -0.01315 | 0.144707 | 0.743    | 1.31     | 0.927608 | 0.988791 |
| Operations and Procedures  | Diagnostic imaging of hepatobiliary system                          | T | 378957 | 861   | 378240 | 0.984 | -0.01593 | 0.175274 | 0.698    | 1.39     | 0.927598 | 0.988791 |
| Operations and Procedures  | Skeletal traction of bone                                           | T | 378957 | 210   | 378891 | 0.967 | -0.03379 | 0.360703 | 0.477    | 1.96     | 0.925364 | 0.988791 |
| Operations and Procedures  | Other external fixation of bone                                     | T | 378957 | 667   | 378434 | 0.983 | -0.01747 | 0.200302 | 0.654    | 1.46     | 0.930491 | 0.988791 |
| Operations and Procedures  | Approach to spine through back                                      | T | 378957 | 309   | 378792 | 1.03  | 0.025402 | 0.283615 | 0.588    | 1.79     | 0.928632 | 0.988791 |
| Medication                 | Vitamin E                                                           | T | 378957 | 11056 | 365980 | 1     | 0.004685 | 0.049357 | 0.912    | 1.11     | 0.924371 | 0.988791 |
| ENT                        | Otosclerosis (HES and self-reported)                                | T | 378957 | 416   | 378685 | 1.02  | 0.023399 | 0.247859 | 0.63     | 1.66     | 0.924789 | 0.988791 |
| Infectious disease         | Malaria (HES and self-reported)                                     | T | 378957 | 480   | 378621 | 0.979 | -0.02129 | 0.234334 | 0.618    | 1.55     | 0.927618 | 0.988791 |
| Digestive system           | Malabsorptioncoeliac disease (HES and self-reported)                | T | 378957 | 2523  | 376578 | 0.991 | -0.00931 | 0.102448 | 0.81     | 1.21     | 0.927619 | 0.988791 |
| Infectious disease         | Shingles (HES and self-reported)                                    | T | 378957 | 734   | 378367 | 0.983 | -0.017   | 0.189762 | 0.678    | 1.43     | 0.928597 | 0.988791 |
| Digestive system           | Bowel intestinal obstruction (HES and self-reported)                | T | 378957 | 3937  | 375164 | 0.993 | -0.0071  | 0.082213 | 0.845    | 1.17     | 0.931205 | 0.988791 |
| Neurosciences              | Benign neuroma (HES and self-reported)                              | T | 378957 | 590   | 378511 | 1.02  | 0.019567 | 0.208652 | 0.677    | 1.53     | 0.925285 | 0.988791 |
| Musculoskeletal            | Fracture head neck (HES and self-reported)                          | T | 378957 | 2134  | 376967 | 1.01  | 0.009965 | 0.111732 | 0.811    | 1.26     | 0.928937 | 0.988791 |
| Musculoskeletal            | OA under age 50                                                     | T | 326966 | 14899 | 312194 | 1     | 0.003707 | 0.042807 | 0.923    | 1.09     | 0.930991 | 0.988791 |
| Cardiovascular             | Cardiac index                                                       | T | 3764   | NA    | NA     | NA    | 0.00846  | 0.089808 | -0.16756 | 0.184485 | 0.924949 | 0.988791 |
| Eye                        | Other retinal disorders (HES)                                       | T | 378957 | 3106  | 375995 | 0.992 | -0.00777 | 0.091915 | 0.829    | 1.19     | 0.932615 | 0.989069 |
| Eye                        | Current eye infection                                               | T | 85144  | 898   | 84281  | 0.986 | -0.01442 | 0.171101 | 0.705    | 1.38     | 0.932821 | 0.989069 |
| Eye                        | Blepharitis eyelid infection (HES and self-reported)                | T | 378957 | 653   | 378448 | 0.983 | -0.01692 | 0.200416 | 0.664    | 1.46     | 0.932738 | 0.989069 |
| Summary                    | Atrophies affecting central nervous system (HES)                    | T | 378957 | 368   | 378733 | 1.02  | 0.022086 | 0.263882 | 0.609    | 1.71     | 0.933299 | 0.989141 |
| Eye                        | Glaucoma surgery trabeculectomy (self-reported)                     | T | 378957 | 535   | 378566 | 1.02  | 0.017795 | 0.218035 | 0.664    | 1.56     | 0.934953 | 0.989625 |
| Other                      | Chest pain or discomfort when walking uphill or hurrying            | T | 47239  | 12507 | 34751  | 0.996 | -0.00449 | 0.055227 | 0.893    | 1.11     | 0.935145 | 0.989625 |
| Operations and Procedures  | Extirpation of lesion of external ear                               | T | 378957 | 1684  | 377417 | 0.99  | -0.01011 | 0.125176 | 0.775    | 1.27     | 0.935616 | 0.989625 |
| Operations and Procedures  | Operations on aneurysm of cerebral artery                           | T | 378957 | 201   | 378900 | 1.03  | 0.029802 | 0.361012 | 0.508    | 2.09     | 0.934209 | 0.989625 |
| Operations and Procedures  | Other autograf of bone                                              | T | 378957 | 1078  | 378023 | 0.987 | -0.0127  | 0.157661 | 0.725    | 1.34     | 0.93581  | 0.989625 |
| Genitourinary              | Undescended testicle (HES and self-reported)                        | T | 378957 | 210   | 378891 | 0.972 | -0.02877 | 0.360858 | 0.479    | 1.97     | 0.936455 | 0.989873 |
| Digestive system           | Gingivitis and periodontal diseases (HES)                           | T | 378957 | 766   | 378335 | 0.986 | -0.0144  | 0.186536 | 0.684    | 1.42     | 0.93845  | 0.991547 |
| Medication                 | Angiotensin ii antagonists plain                                    | T | 378957 | 16106 | 362995 | 0.997 | -0.00277 | 0.041485 | 0.919    | 1.08     | 0.946694 | 0.991547 |
| Summary                    | Inflammatory diseases of the central nervous system (HES)           | T | 378957 | 536   | 378565 | 0.985 | -0.01555 | 0.222849 | 0.636    | 1.52     | 0.944364 | 0.991547 |
| Summary                    | HESCH Diseases of the respiratory system BIN (HES)                  | T | 378957 | 55412 | 323689 | 1     | 0.001763 | 0.023668 | 0.956    | 1.05     | 0.940612 | 0.991547 |
| Infectious disease         | Diarrhoea presumed infectious (HES)                                 | T | 378957 | 5076  | 374025 | 0.995 | -0.0048  | 0.072517 | 0.863    | 1.15     | 0.947254 | 0.991547 |
| Metabolic                  | Postprocedural endocrine and metabolic disorders (HES)              | T | 378957 | 1206  | 377895 | 0.99  | -0.00959 | 0.147684 | 0.742    | 1.32     | 0.948205 | 0.991547 |
| Respiratory                | Respiratory failure (HES)                                           | T | 378957 | 1845  | 377256 | 0.992 | -0.00837 | 0.119927 | 0.784    | 1.25     | 0.94439  | 0.991547 |
| Symptoms                   | Abdominal and pelvic pain (HES)                                     | T | 378957 | 28298 | 350803 | 1     | 0.002318 | 0.031773 | 0.942    | 1.07     | 0.941855 | 0.991547 |
| Medication                 | Direct acting antivirals                                            | T | 378957 | 823   | 378278 | 1.01  | 0.01333  | 0.177972 | 0.715    | 1.44     | 0.940296 | 0.991547 |
| Medication                 | Antifungives                                                        | T | 378957 | 4005  | 375096 | 0.994 | -0.0059  | 0.081884 | 0.847    | 1.17     | 0.942565 | 0.991547 |
| Operations and Procedures  | Elbow surgery (self-reported)                                       | T | 378957 | 2248  | 376853 | 1.01  | 0.007196 | 0.107972 | 0.815    | 1.24     | 0.946863 | 0.991547 |
| Operations and Procedures  | Bunion hallux valgus surgery (self-reported)                        | T | 378957 | 4996  | 374105 | 1.01  | 0.005282 | 0.072716 | 0.872    | 1.16     | 0.942097 | 0.991547 |
| Cancer                     | Mal neo larynx (cancer register)                                    | T | 378957 | 224   | 378877 | 1.02  | 0.023292 | 0.340653 | 0.525    | 2        | 0.945489 | 0.991547 |
| Cancer                     | Mal neo corpus uteri (cancer register)                              | T | 378957 | 1276  | 378225 | 1.01  | 0.009441 | 0.142262 | 0.764    | 1.33     | 0.947091 | 0.991547 |
| Operations and Procedures  | Operations on duct of breast                                        | T | 378957 | 761   | 378340 | 0.986 | -0.01417 | 0.1867   | 0.684    | 1.42     | 0.939497 | 0.991547 |
| Operations and Procedures  | Extirpation of lesion of lip                                        | T | 378957 | 1563  | 377538 | 0.992 | -0.00841 | 0.130941 | 0.767    | 1.28     | 0.948772 | 0.991547 |
| Operations and Procedures  | Primary closed reduction of traumatic dislocation of joint          | T | 378957 | 775   | 378326 | 0.987 | -0.01275 | 0.186471 | 0.685    | 1.42     | 0.945468 | 0.991547 |
| Operations and Procedures  | Other operations on unspecified organ                               | T | 378957 | 2194  | 376907 | 1.01  | 0.007561 | 0.115471 | 0.804    | 1.26     | 0.947791 | 0.991547 |
| Neurosciences              | Peripheral neuropathy (HES and self-reported)                       | T | 378957 | 2013  | 377088 | 1.01  | 0.007683 | 0.113824 | 0.806    | 1.26     | 0.946187 | 0.991547 |
| Cardiovascular             | Lymphoedema (HES and self-reported)                                 | T | 378957 | 527   | 378574 | 0.984 | -0.01615 | 0.222971 | 0.636    | 1.52     | 0.942259 | 0.991547 |
| Respiratory                | Respiratory infection (HES and self-reported)                       | T | 378957 | 9656  | 369445 | 0.996 | -0.00378 | 0.053085 | 0.898    | 1.11     | 0.943265 | 0.991547 |
| Musculoskeletal            | Tennis elbow lateral epicondylitis (HES and self-reported)          | T | 378957 | 796   | 378305 | 1.01  | 0.012318 | 0.180717 | 0.71     | 1.44     | 0.945656 | 0.991547 |
| Musculoskeletal            | Housemaids knee prepatellar bursitis (HES and self-reported)        | T | 378957 | 300   | 378801 | 1.02  | 0.019566 | 0.294881 | 0.572    | 1.82     | 0.947096 | 0.991547 |
| Infectious disease         | Scarlet fever scarlatina (HES and self-reported)                    | T | 378957 | 435   | 378666 | 1.02  | 0.016838 | 0.241013 | 0.634    | 1.63     | 0.944303 | 0.991547 |
| Anthropometry              | Total thigh muscle volume                                           | T | 758    | NA    | NA     | NA    | -0.01302 | 0.202669 | -0.41026 | 0.384206 | 0.948758 | 0.991547 |
| Biological assays          | Eosinophil count                                                    | T | 367067 | NA    | NA     | NA    | -0.00064 | 0.008442 | -0.01719 | 0.015906 | 0.939498 | 0.991547 |
| Anthropometry              | Total trunk fat                                                     | T | 801    | NA    | NA     | NA    | 0.012628 | 0.19988  | -0.37914 | 0.404393 | 0.949626 | 0.992042 |
| Medication                 | Corticosteroids combinations with antibiotics                       | T | 378957 | 20857 | 358244 | 0.998 | -0.0022  | 0.036439 | 0.929    | 1.07     | 0.9519   | 0.992276 |
| Summary                    | Diseases of inner ear (HES)                                         | T | 378957 | 1848  | 377253 | 1.01  | 0.007106 | 0.119001 | 0.798    | 1.27     | 0.952385 | 0.992276 |

|                            |                                                                                     |   |        |       |        |       |           |          |          |         |          |          |
|----------------------------|-------------------------------------------------------------------------------------|---|--------|-------|--------|-------|-----------|----------|----------|---------|----------|----------|
| Eye                        | Corneal hysteresis right                                                            | T | 81141  | NA    | NA     | NA    | -0.00082  | 0.017724 | -0.03556 | 0.03392 | 0.963124 | 0.994359 |
| Summary                    | Papulogranulomatous disorders (HES)                                                 | T | 378957 | 2604  | 376497 | 0.996 | -0.00428  | 0.10141  | 0.816    | 1.21    | 0.966351 | 0.994377 |
| Medication                 | Aminoglycoside antibacterials                                                       | T | 378957 | 622   | 378479 | 1.01  | 0.008528  | 0.204404 | 0.676    | 1.51    | 0.966721 | 0.994377 |
| Medication                 | Antifungals                                                                         | T | 378957 | 1041  | 378060 | 0.993 | -0.00684  | 0.159626 | 0.726    | 1.36    | 0.965818 | 0.994377 |
| Eye                        | Eyelid surgery (self-reported)                                                      | T | 378957 | 269   | 378832 | 1.01  | 0.012972  | 0.308099 | 0.554    | 1.85    | 0.966416 | 0.994377 |
| Operations and Procedures  | Excision of rectum                                                                  | T | 378957 | 2290  | 376811 | 1     | 0.004267  | 0.106882 | 0.814    | 1.24    | 0.968155 | 0.995427 |
| Summary                    | HESCH Diseases of the ear and mastoid process (HES)                                 | T | 378957 | 8809  | 370292 | 0.998 | -0.00202  | 0.055265 | 0.896    | 1.11    | 0.97078  | 0.995576 |
| Respiratory                | Other disorders of nose and nasal sinuses (HES)                                     | T | 378957 | 5991  | 373110 | 1     | 0.002467  | 0.067155 | 0.879    | 1.14    | 0.970692 | 0.995576 |
| Symptoms                   | Other general symptoms and signs (HES)                                              | T | 378957 | 358   | 378743 | 0.99  | -0.01024  | 0.272887 | 0.58     | 1.69    | 0.970071 | 0.995576 |
| Operations and Procedures  | Breath tests                                                                        | T | 378957 | 412   | 378689 | 0.99  | -0.00967  | 0.255248 | 0.601    | 1.63    | 0.969793 | 0.995576 |
| Operations and Procedures  | Harvest of bone                                                                     | T | 378957 | 1453  | 377648 | 1     | 0.004922  | 0.134314 | 0.772    | 1.31    | 0.970767 | 0.995576 |
| Gynaecology and Obstetrics | Cervical intraepithelial neoplasia cin precancer (HES and self-reported)            | T | 378957 | 1670  | 377431 | 0.995 | -0.00476  | 0.125368 | 0.778    | 1.27    | 0.966966 | 0.995576 |
| Symptoms                   | Other abnormal findings in urine (HES)                                              | T | 378957 | 297   | 378804 | 1.01  | 0.010076  | 0.294931 | 0.567    | 1.8     | 0.972747 | 0.996745 |
| ENT                        | Nasal polyp surgery nasal polypectomy (self-reported)                               | T | 378957 | 1137  | 377964 | 1.01  | 0.005179  | 0.150877 | 0.748    | 1.35    | 0.972617 | 0.996745 |
| Operations and Procedures  | Vasectomy (self-reported)                                                           | T | 378957 | 9426  | 369675 | 1     | 0.001711  | 0.054668 | 0.9      | 1.12    | 0.97503  | 0.997565 |
| Operations and Procedures  | Other diagnostic imaging of vascular system                                         | T | 378957 | 2957  | 376144 | 0.997 | -0.00296  | 0.094059 | 0.829    | 1.2     | 0.974927 | 0.997565 |
| Operations and Procedures  | Diaphyseal division of bone                                                         | T | 378957 | 396   | 378705 | 0.992 | -0.00809  | 0.255565 | 0.601    | 1.64    | 0.974749 | 0.997565 |
| Operations and Procedures  | Other intravenous injection                                                         | T | 378957 | 5047  | 374054 | 0.998 | -0.00226  | 0.072731 | 0.865    | 1.15    | 0.975204 | 0.997565 |
| Gynaecology and Obstetrics | Maternal care for related to pregnancy (HES)                                        | T | 378957 | 1641  | 377460 | 1     | 0.003788  | 0.128065 | 0.781    | 1.29    | 0.976404 | 0.998104 |
| Symptoms                   | Gangrene (HES)                                                                      | T | 378957 | 510   | 378591 | 0.993 | -0.00662  | 0.228402 | 0.635    | 1.55    | 0.97686  | 0.998104 |
| Operations and Procedures  | Drainage through perineal region                                                    | T | 378957 | 1052  | 378049 | 1     | 0.004607  | 0.159648 | 0.735    | 1.37    | 0.976978 | 0.998104 |
| Digestive system           | Hiatus hernia (HES and self-reported)                                               | T | 378957 | 27678 | 351423 | 1     | 0.000911  | 0.032146 | 0.94     | 1.07    | 0.977388 | 0.998104 |
| Operations and Procedures  | Other excision of skin                                                              | T | 378957 | 205   | 378896 | 1.01  | 0.009782  | 0.360872 | 0.498    | 2.05    | 0.978375 | 0.998689 |
| Medication                 | Intestinal antiinflammatory agents                                                  | T | 378957 | 25513 | 353588 | 1     | 0.00072   | 0.033174 | 0.938    | 1.07    | 0.982676 | 0.999046 |
| Medication                 | Iv solution additives                                                               | T | 378957 | 936   | 378165 | 0.997 | -0.00309  | 0.168112 | 0.717    | 1.39    | 0.985322 | 0.999046 |
| Medication                 | Cardiac glycosides                                                                  | T | 378957 | 1042  | 378059 | 0.998 | -0.00194  | 0.158089 | 0.732    | 1.36    | 0.990194 | 0.999046 |
| Medication                 | Corticosteroids plain                                                               | T | 378957 | 34978 | 344123 | 1     | 0.000432  | 0.02875  | 0.946    | 1.06    | 0.988015 | 0.999046 |
| Summary                    | Disorders of choroid and retina (HES)                                               | T | 378957 | 6755  | 372346 | 1     | -0.0005   | 0.062572 | 0.884    | 1.13    | 0.993655 | 0.999046 |
| Summary                    | Diseases of appendix (HES)                                                          | T | 378957 | 3245  | 378556 | 0.999 | -0.00066  | 0.090279 | 0.837    | 1.19    | 0.994192 | 0.999046 |
| Summary                    | HESCH Congenital malformations and chromosomal abnormalities (HES)                  | T | 378957 | 4981  | 374120 | 0.999 | -0.00076  | 0.073033 | 0.866    | 1.15    | 0.991672 | 0.999046 |
| Mental health              | Bipolar affective disorder (HES)                                                    | T | 378957 | 888   | 378213 | 0.998 | -0.00175  | 0.172729 | 0.712    | 1.4     | 0.991899 | 0.999046 |
| Neurosciences              | Other headache syndromes (HES)                                                      | T | 378957 | 459   | 378642 | 0.996 | -0.0044   | 0.240677 | 0.621    | 1.6     | 0.985423 | 0.999046 |
| Neurosciences              | Other diseases of spinal cord (HES)                                                 | T | 378957 | 528   | 378573 | 1.01  | 0.005799  | 0.222933 | 0.65     | 1.56    | 0.979248 | 0.999046 |
| Neurosciences              | Other disorders of CNS (HES)                                                        | T | 378957 | 223   | 378878 | 1.01  | 0.006038  | 0.340478 | 0.516    | 1.96    | 0.985852 | 0.999046 |
| Respiratory                | Other diseases of upper respiratory tract (HES)                                     | T | 378957 | 650   | 378451 | 1     | 0.002444  | 0.20042  | 0.677    | 1.48    | 0.990269 | 0.999046 |
| Operations and Procedures  | Incisional hernia repair (self-reported)                                            | T | 378957 | 1461  | 377640 | 0.997 | -0.0026   | 0.134342 | 0.767    | 1.3     | 0.984569 | 0.999046 |
| Operations and Procedures  | Shoulder surgery (self-reported)                                                    | T | 378957 | 5679  | 373422 | 0.999 | -0.0011   | 0.068317 | 0.874    | 1.14    | 0.987117 | 0.999046 |
| Gynaecology and Obstetrics | Pelvic floor surgery (self-reported)                                                | T | 378957 | 271   | 378830 | 1.01  | 0.007805  | 0.308189 | 0.551    | 1.84    | 0.979795 | 0.999046 |
| Operations and Procedures  | Removal of malignant melanoma (self-reported)                                       | T | 378957 | 716   | 378385 | 0.998 | -0.00161  | 0.189868 | 0.688    | 1.45    | 0.993229 | 0.999046 |
| Cancer                     | Malignant thyroid gland (cancer register)                                           | T | 378957 | 431   | 378670 | 0.996 | -0.00387  | 0.247711 | 0.613    | 1.62    | 0.987523 | 0.999046 |
| Cancer                     | Benign neoplasm of meninges (cancer register)                                       | T | 378957 | 350   | 378751 | 0.994 | -0.00614  | 0.273033 | 0.582    | 1.7     | 0.982054 | 0.999046 |
| Operations and Procedures  | Excision of parathyroid gland                                                       | T | 378957 | 695   | 378406 | 0.996 | -0.00433  | 0.193221 | 0.682    | 1.45    | 0.982123 | 0.999046 |
| Operations and Procedures  | Drainage of middle ear                                                              | T | 378957 | 1751  | 377350 | 0.998 | -0.00221  | 0.123162 | 0.784    | 1.27    | 0.985709 | 0.999046 |
| Operations and Procedures  | Operations on unspecified nasal sinus                                               | T | 378957 | 717   | 378384 | 1     | 0.002253  | 0.193043 | 0.687    | 1.46    | 0.990689 | 0.999046 |
| Operations and Procedures  | Surgery on apex of tooth                                                            | T | 378957 | 1147  | 377954 | 1     | 0.003271  | 0.152392 | 0.744    | 1.35    | 0.982877 | 0.999046 |
| Operations and Procedures  | Extirpation of lesion of tongue                                                     | T | 378957 | 690   | 378411 | 0.996 | -0.00385  | 0.196577 | 0.678    | 1.46    | 0.984389 | 0.999046 |
| Operations and Procedures  | Other operations on scrotum                                                         | T | 378957 | 203   | 378898 | 1.01  | 0.007423  | 0.361088 | 0.496    | 2.04    | 0.983599 | 0.999046 |
| Operations and Procedures  | Biopsy of cervix uteri                                                              | T | 378957 | 1749  | 377352 | 1     | 0.001411  | 0.122625 | 0.787    | 1.27    | 0.990822 | 0.999046 |
| Operations and Procedures  | Other open operations on bone                                                       | T | 378957 | 605   | 378496 | 1     | 0.002241  | 0.208544 | 0.666    | 1.51    | 0.991427 | 0.999046 |
| Operations and Procedures  | Harvest of other tissue                                                             | T | 378957 | 784   | 378317 | 1     | 0.004346  | 0.183525 | 0.701    | 1.44    | 0.981108 | 0.999046 |
| Medication                 | Vitamin A                                                                           | T | 376892 | 7193  | 369843 | 1     | 0.000422  | 0.060985 | 0.888    | 1.13    | 0.994484 | 0.999046 |
| Medication                 | Selenium                                                                            | T | 377706 | 9070  | 368780 | 1     | 0.000621  | 0.054299 | 0.9      | 1.11    | 0.990871 | 0.999046 |
| Cardiovascular             | Subdural haemorrhage/haematoma (HES and self-reported)                              | T | 378957 | 380   | 378721 | 0.997 | -0.00258  | 0.263736 | 0.595    | 1.67    | 0.992195 | 0.999046 |
| Metabolic                  | Hypothyroidism/myxoedema (HES and self-reported)                                    | T | 378957 | 22541 | 356560 | 1     | 0.000279  | 0.035547 | 0.933    | 1.07    | 0.993744 | 0.999046 |
| Eye                        | Eye infection (HES and self-reported)                                               | T | 378957 | 2800  | 376301 | 1     | 0.001864  | 0.097243 | 0.828    | 1.21    | 0.984711 | 0.999046 |
| Immuno-inflammation        | Allergy/hypersensitivity/anaphylaxis (HES and self-reported)                        | T | 378957 | 3101  | 376000 | 0.998 | -0.0015   | 0.09281  | 0.832    | 1.2     | 0.98709  | 0.999046 |
| Immuno-inflammation        | Hayfever/allergic rhinitis (HES and self-reported)                                  | T | 378957 | 22257 | 356844 | 1     | -0.00032  | 0.035386 | 0.933    | 1.07    | 0.992811 | 0.999046 |
| Musculoskeletal            | Burns (HES and self-reported)                                                       | T | 378957 | 765   | 378336 | 1     | 0.001869  | 0.186544 | 0.695    | 1.44    | 0.992008 | 0.999046 |
| Immuno-inflammation        | Chronic fatigue syndrome (HES and self-reported)                                    | T | 378957 | 1921  | 377180 | 0.997 | -0.00273  | 0.11744  | 0.792    | 1.26    | 0.98146  | 0.999046 |
| Infectious disease         | Infectious mononucleosis/glandular fever/epstein-barr virus (HES and self-reported) | T | 378957 | 517   | 378584 | 0.996 | -0.00366  | 0.223039 | 0.644    | 1.54    | 0.98691  | 0.999046 |
| Musculoskeletal            | Fracture nose (HES and self-reported)                                               | T | 378957 | 1043  | 378058 | 0.997 | -0.00259  | 0.159672 | 0.729    | 1.36    | 0.987038 | 0.999046 |
| Summary                    | Other maternal disorders predominantly related to pregnancy (HES)                   | T | 378957 | 2789  | 376312 | 1     | -0.00038  | 0.100212 | 0.821    | 1.22    | 0.996992 | 0.999181 |
| Summary                    | Complications predominantly related to the puerperium (HES)                         | T | 378957 | 557   | 378544 | 1     | 0.000905  | 0.215503 | 0.657    | 1.53    | 0.996643 | 0.999181 |
| Immuno-inflammation        | Seborrheic keratosis (HES)                                                          | T | 378957 | 2813  | 376288 | 1     | -0.00031  | 0.096898 | 0.827    | 1.21    | 0.997472 | 0.999181 |
| Genitourinary              | Calculus of lower urinary tract (HES)                                               | T | 378957 | 726   | 378375 | 1     | -0.00039  | 0.189963 | 0.689    | 1.45    | 0.988351 | 0.999181 |
| Family history             | Parkinson's disease (family history - mother)                                       | T | 354043 | 5725  | 348456 | 1     | -0.0002   | 0.067791 | 0.875    | 1.14    | 0.997615 | 0.999181 |
| Operations and Procedures  | Other internal fixation of bone                                                     | T | 378957 | 5999  | 373102 | 1     | 0.000225  | 0.066589 | 0.878    | 1.14    | 0.997307 | 0.999181 |
| Operations and Procedures  | Diagnostic endoscopic examination of other joint                                    | T | 378957 | 560   | 378541 | 0.999 | -0.00067  | 0.217764 | 0.652    | 1.53    | 0.997554 | 0.999181 |
| Operations and Procedures  | Other methods of operation on organ NOC                                             | T | 378957 | 1830  | 377271 | 1     | -0.00038  | 0.120615 | 0.789    | 1.27    | 0.997494 | 0.999181 |
| Musculoskeletal            | BIN combined fractures                                                              | T | 378957 | 28020 | 351081 | 1     | -7.67E-05 | 0.031812 | 0.939    | 1.06    | 0.998076 | 0.999181 |
| Musculoskeletal            | Fracture pelvis (HES and self-reported)                                             | T | 378957 | 555   | 378546 | 1     | 0.0003    | 0.217799 | 0.653    | 1.53    | 0.998903 | 0.999318 |
| Summary                    | Demyelinating diseases of the central nervous system (HES)                          | T | 378957 | 1406  | 377695 | 1     | 2.26E-05  | 0.136707 | 0.765    | 1.31    | 0.999868 | 0.999868 |

Ordered by FDR. The category "Summary" indicates cases were anyone with admission for any code in the block. \* Lung function measures described as "strict" only include individuals with passed-QC spirometry (see reference 16 in the main manuscript). Strict measures were not included in Figure 1.
