# Supplementary material for: Pleiotropic associations of heterozygosity for the SERPINA1 Z allele in the UK Biobank
Source: PubMed Central journal article supplement (PMC8107350; doi:10.1183/23120541.00049-2021), 2021-05-10
Supplement: 00049-2021.TableS4.pdf [file 00049-2021.TableS4.pdf]

**Table S4. Interactions between the *SERPINA1* Z allele and smoking status or sex in UK Biobank participants**

| Interaction | Genetic model | FEV <sub>1</sub> (ml) |         |              | FEV <sub>1</sub> /FVC |        |                       | FVC (ml) |         |       | COPD |           |       |
|-------------|---------------|-----------------------|---------|--------------|-----------------------|--------|-----------------------|----------|---------|-------|------|-----------|-------|
|             |               | beta                  | se      | p            | beta                  | se     | p                     | beta     | se      | p     | OR   | 95% CI    | p     |
| Z*EVERSMK   | Heterozygous  | 20.782                | 9.107   | <b>0.022</b> | 0.0044                | 0.0011 | 1.06x10 <sup>-4</sup> | 6.587    | 10.899  | 0.546 | 1.31 | 1.10-1.58 | 0.003 |
| Z*EVERSMK   | Recessive     | 192.066               | 103.651 | 0.064        | 0.045                 | 0.013  | 5.06x10 <sup>-4</sup> | 60.088   | 124.033 | 0.628 | 1.46 | 0.51-4.28 | 0.484 |
| Z*sex       | Heterozygous  | 6.821                 | 9.13    | 0.455        | 0.0042                | 0.0011 | 0.00021               | -12.351  | 10.927  | 0.258 | 0.88 | 0.74-1.05 | 0.153 |
| Z*sex       | Recessive     | 57.606                | 100.578 | 0.567        | 0.026                 | 0.013  | 0.041                 | -18.799  | 120.356 | 0.876 | 1.18 | 0.41-3.34 | 0.755 |

Results are based on linear (or logistic, in the case of COPD) regression adjusting for sex, age, age<sup>2</sup>, height, ever-smoking, ancestry-based principal components, and genotyping array. The heterozygous or recessive genetic model was also included in the regression as shown. Males were coded as 1 and females as 2, so a positive interaction coefficient means there was a more positive coefficient in females compared to males and a negative interaction coefficient means there was a less positive coefficient in females compared to males. Ever-smoking status was coded 1 if the individual had ever-smoked and 2 if the individual had never smoked.
