# Supplementary material for: Pleiotropic associations of heterozygosity for the SERPINA1 Z allele in the UK Biobank
Source: PubMed Central journal article supplement (PMC8107350; doi:10.1183/23120541.00049-2021), 2021-05-10
Supplement: 00049-2021.TableS5.pdf [file 00049-2021.TableS5.pdf]

**Table S5. Association of heterozygosity for the *SERPINA1* Z allele with height and lung function in individuals aged 8, 15, and 24**

| Age (years) | Height (cm) |       |       |       | FEV <sub>1</sub> /FVC <sup>a</sup> |       |       |       |
|-------------|-------------|-------|-------|-------|------------------------------------|-------|-------|-------|
|             | N           | beta  | se    | p     | N                                  | beta  | se    | p     |
| <b>8</b>    | 5,162       | 0.064 | 0.385 | 0.869 | 4,838                              | 0.023 | 0.071 | 0.744 |
| <b>15</b>   | 4,023       | 0.452 | 0.512 | 0.378 | 2,930                              | 0.016 | 0.086 | 0.848 |
| <b>24</b>   | 2,766       | 0.493 | 0.558 | 0.376 | 2,131                              | 0.078 | 0.096 | 0.415 |

Data derived from study participants in the ALSPAC study. <sup>a</sup>Age, sex, and height adjusted Z scores
