# Supplementary material for: Pleiotropic associations of heterozygosity for the SERPINA1 Z allele in the UK Biobank
Source: PubMed Central journal article supplement (PMC8107350; doi:10.1183/23120541.00049-2021), 2021-05-10
Supplement: 00049-2021.TableS6.pdf [file 00049-2021.TableS6.pdf]

**Table S6. Association between the *SERPINA1* Z allele and lung function traits in UK Biobank male and female never- and ever-smokers**

| Genetic model | Subgroup             | FEV <sub>1</sub> (ml) |         |        | FEV <sub>1</sub> /FVC |         |                        | FVC (ml) |         |       | COPD               |                       |
|---------------|----------------------|-----------------------|---------|--------|-----------------------|---------|------------------------|----------|---------|-------|--------------------|-----------------------|
|               |                      | beta                  | se      | p      | beta                  | se      | p                      | beta     | se      | p     | OR (95% CI)        | p                     |
| Heterozygous  | Male never-smokers   | 17.013                | 11.346  | 0.134  | 0.00087               | 0.0012  | 0.478                  | 15.941   | 13.751  | 0.246 | 1.04 (0.84-1.28)   | 0.689                 |
|               | Female never-smokers | 20.493                | 6.251   | 0.001  | 0.0045                | 0.00086 | 1.75x10 <sup>-7</sup>  | 10.265   | 7.72    | 0.184 | 0.73 (0.59-0.91)   | 0.005                 |
|               | Male ever-smokers    | -13.986               | 11.327  | 0.217  | -0.0036               | 0.0013  | 7.55x10 <sup>-3</sup>  | 1.672    | 13.204  | 0.899 | 1.16 (1.01-1.33)   | 0.028                 |
|               | Female ever-smokers  | 9.974                 | 8.142   | 0.221  | 0.00027               | 0.0012  | 0.821                  | 9.896    | 9.682   | 0.307 | 1.16 (0.98-1.36)   | 0.081                 |
| Recessive     | Male never-smokers   | -184.651              | 111.011 | 0.096  | -0.033                | 0.012   | 6.81x10 <sup>-3</sup>  | -155.016 | 134.511 | 0.249 | 5.26 (1.46-14.78)  | 0.004                 |
|               | Female never-smokers | -158.256              | 67.643  | 0.019  | -0.034                | 0.0093  | 2.20x10 <sup>-4</sup>  | -55.679  | 83.539  | 0.505 | 6.28 (2.07-15.50)  | 2.65x10 <sup>-4</sup> |
|               | Male ever-smokers    | -422.885              | 133.09  | 0.0015 | -0.106                | 0.016   | 1.84x10 <sup>-11</sup> | -103.271 | 155.115 | 0.506 | 8.37 (3.01-21.51)  | 1.64x10 <sup>-5</sup> |
|               | Female ever-smokers  | -314.24               | 102.273 | 0.0021 | -0.05                 | 0.015   | 9.14x10 <sup>-4</sup>  | -258.857 | 121.59  | 0.033 | 10.77 (2.95-31.82) | 5.60x10 <sup>-5</sup> |

Results are based on linear (or logistic, in the case of COPD) regression adjusting for age, age<sup>2</sup>, height, ancestry-based principal components, and genotyping array. The heterozygous or recessive genetic model was also included in the regression as shown
