# Supplementary material for: Pleiotropic associations of heterozygosity for the SERPINA1 Z allele in the UK Biobank
Source: ERJ Open Res. 2021 May 10;7(2):00049-2021. doi: 10.1183/23120541.00049-2021 (PMC8107350; doi:10.1183/23120541.00049-2021)
Supplement: Supplementary file 4 [file 00049-2021.TableS3.pdf]

Table S3. Phenome-wide association study results for *SERPINA1* Z allele homozygosity in UK Biobank

| Category                  | Phenotype                                                              | Effect allele | N      | Cases | Controls | OR    | Beta      | SE       | L95       | U95       | P         | FDR       |
|---------------------------|------------------------------------------------------------------------|---------------|--------|-------|----------|-------|-----------|----------|-----------|-----------|-----------|-----------|
| Respiratory               | Alpha1 antitrypsin deficiency (HES and self-reported)                  | T             | 379101 | 223   | 378878   | 293   | 5.67848   | 0.260676 | 175       | 488       | 3.32E-105 | 7.90E-102 |
| Metabolic                 | Other metabolic disorders (HES)                                        | T             | 379101 | 309   | 378792   | 194   | 5.27007   | 0.262003 | 116       | 325       | 5.50E-90  | 6.55E-87  |
| Respiratory               | Emphysema (HES and self-reported)                                      | T             | 379101 | 1662  | 377439   | 52.5  | 3.96133   | 0.240719 | 32.8      | 84.2      | 7.56E-61  | 6.00E-58  |
| Respiratory               | Emphysema (HES)                                                        | T             | 379101 | 1571  | 377530   | 52.5  | 3.96161   | 0.245029 | 32.5      | 84.9      | 8.49E-59  | 5.06E-56  |
| Respiratory               | Chronic obstructive airways disease (COPD) (HES and self-reported)     | T             | 379101 | 8796  | 370305   | 13.3  | 2.59138   | 0.219958 | 8.67      | 20.5      | 4.87E-32  | 2.32E-29  |
| Respiratory               | Emphysemachronic bronchitis (HES and self-reported)                    | T             | 379101 | 6338  | 372763   | 13.9  | 2.62844   | 0.226642 | 8.88      | 21.6      | 4.25E-31  | 1.69E-28  |
| Respiratory               | COPDMappingStrict*                                                     | T             | 190073 | 16733 | 173340   | 13.2  | 2.57861   | 0.24978  | 8.08      | 21.5      | 5.52E-25  | 1.88E-22  |
| Respiratory               | COPDMappingLoose* primAndSec                                           | T             | 244600 | 25872 | 218728   | 8.81  | 2.17549   | 0.221711 | 5.7       | 13.6      | 9.97E-23  | 2.97E-20  |
| Respiratory               | FEV1 FVC ratio ever smoked only                                        | T             | 175269 | NA    | NA       | NA    | -1.1089   | 0.132374 | -1.36835  | -0.849447 | 5.43E-17  | 1.44E-14  |
| Respiratory               | FEV1 FVC ratio ever smoked only strict                                 | T             | 136716 | NA    | NA       | NA    | -1.15924  | 0.148963 | -1.45121  | -0.867273 | 7.14E-15  | 1.70E-12  |
| Summary                   | Chronic lower respiratory diseases (HES)                               | T             | 379101 | 30351 | 348750   | 4.36  | 1.47141   | 0.190988 | 3         | 6.33      | 1.32E-14  | 2.85E-12  |
| Respiratory               | FEV1 FVC ratio strict                                                  | T             | 221665 | NA    | NA       | NA    | -0.836435 | 0.111045 | -1.05408  | -0.618787 | 4.98E-14  | 9.88E-12  |
| Respiratory               | FEV1 FVC ratio                                                         | T             | 286167 | NA    | NA       | NA    | -0.706768 | 0.098487 | -0.899803 | -0.513733 | 7.17E-13  | 1.31E-10  |
| Respiratory               | Other chronic obstructive pulmonary disease (HES)                      | T             | 379101 | 7608  | 371493   | 7.23  | 1.97863   | 0.276163 | 4.21      | 12.4      | 7.79E-13  | 1.33E-10  |
| Medication                | Other drugs for obstructive airway diseases inhalants                  | T             | 379101 | 29711 | 349390   | 3.6   | 1.27976   | 0.199137 | 2.43      | 5.31      | 1.31E-10  | 2.07E-08  |
| Family history            | Chronic bronchitis emphysema (family history - sibling)                | T             | 301029 | 8228  | 292801   | 5.67  | 1.73432   | 0.272396 | 3.32      | 9.66      | 1.93E-10  | 2.87E-08  |
| Biological assays         | Haemoglobin concentration                                              | T             | 367863 | NA    | NA       | NA    | 0.518894  | 0.084205 | 0.353852  | 0.683936  | 7.17E-10  | 1.00E-07  |
| Respiratory               | FEV1 percent pred                                                      | T             | 285936 | NA    | NA       | NA    | -0.598007 | 0.098453 | -0.792774 | -0.40684  | 1.11E-09  | 1.47E-07  |
| Respiratory               | FEV1 percent pred strict                                               | T             | 221665 | NA    | NA       | NA    | -0.651361 | 0.11101  | -0.868941 | -0.433781 | 4.42E-09  | 5.54E-07  |
| Summary                   | HESCH Diseases of the respiratory system BIN (HES)                     | T             | 379101 | 55412 | 323689   | 2.85  | 1.04713   | 0.180357 | 2         | 4.06      | 6.40E-09  | 7.62E-07  |
| Medication                | Adrenergics inhalants                                                  | T             | 379101 | 26289 | 352812   | 3.35  | 1.2098    | 0.211356 | 2.22      | 5.07      | 1.04E-08  | 1.18E-06  |
| Respiratory               | Other respiratory problems (HES and self-reported)                     | T             | 379101 | 5684  | 373417   | 5.63  | 1.72865   | 0.31691  | 3.03      | 10.5      | 4.91E-08  | 5.31E-06  |
| Biological assays         | Haematocrit percentage                                                 | T             | 367863 | NA    | NA       | NA    | 0.455851  | 0.084203 | 0.290814  | 0.620888  | 6.17E-08  | 6.39E-06  |
| Respiratory               | Bring up phlegm sputum mucus on most days                              | T             | 95696  | 8125  | 87571    | 5.99  | 1.78964   | 0.337325 | 3.09      | 11.6      | 1.12E-07  | 1.11E-05  |
| Respiratory               | FEV1 ever smoked only                                                  | T             | 175269 | NA    | NA       | NA    | -0.700005 | 0.132125 | -0.95897  | -0.44104  | 1.17E-07  | 1.11E-05  |
| Other                     | Wheeze or whistling in the chest in last year                          | T             | 371979 | 77179 | 294800   | 2.49  | 0.913788  | 0.174916 | 1.77      | 3.51      | 1.75E-07  | 1.60E-05  |
| Respiratory               | Bronchiectasis (HES and self-reported)                                 | T             | 379101 | 2109  | 376992   | 8.57  | 2.14808   | 0.421477 | 3.75      | 19.6      | 3.46E-07  | 3.05E-05  |
| Respiratory               | PEF maximumValue                                                       | T             | 286167 | NA    | NA       | NA    | -0.494363 | 0.09839  | -0.687207 | -0.301519 | 5.05E-07  | 4.29E-05  |
| Medication                | Decongestants and other nasal preparations for topical use             | T             | 379101 | 33775 | 345326   | 2.75  | 1.0132    | 0.205968 | 1.84      | 4.12      | 8.69E-07  | 7.13E-05  |
| Operations and Procedures | Diagnostic imaging of chest                                            | T             | 379101 | 2157  | 376944   | 7.82  | 2.05652   | 0.420494 | 3.43      | 17.8      | 1.00E-06  | 7.97E-05  |
| Respiratory               | PEF maximumValue strict                                                | T             | 221665 | NA    | NA       | NA    | -0.532893 | 0.110972 | -0.750398 | -0.315388 | 1.57E-06  | 0.000121  |
| Respiratory               | Cough on most days                                                     | T             | 95696  | 13048 | 82648    | 4.65  | 1.53701   | 0.321706 | 2.48      | 8.74      | 1.77E-06  | 0.000132  |
| Respiratory               | Bronchiectasis (HES)                                                   | T             | 379101 | 1708  | 377393   | 8.78  | 2.17191   | 0.459648 | 3.56      | 21.6      | 2.30E-06  | 0.000166  |
| Medication                | Corticosteroids plain                                                  | T             | 379101 | 34978 | 344123   | 2.64  | 0.970822  | 0.205862 | 1.76      | 3.95      | 2.41E-06  | 0.000169  |
| Respiratory               | Respiratory disorders in diseases classified elsewhere (HES)           | T             | 379101 | 201   | 378900   | 28.2  | 3.33759   | 0.717081 | 6.9       | 115       | 3.25E-06  | 0.000221  |
| Respiratory               | Pleurisy (HES and self-reported)                                       | T             | 379101 | 1687  | 377414   | 8.21  | 2.10541   | 0.456218 | 3.36      | 20.1      | 3.93E-06  | 0.00026   |
| Haematology               | Other diseases of blood and blood forming organs (HES)                 | T             | 379101 | 563   | 378538   | 14.8  | 2.69252   | 0.586526 | 4.68      | 46.6      | 4.42E-06  | 0.000277  |
| Eye                       | Optic neuritis (HES and self-reported)                                 | T             | 379101 | 206   | 378895   | 26.9  | 3.29319   | 0.716627 | 6.61      | 110       | 4.32E-06  | 0.000277  |
| Respiratory               | FEV1 maximumValue                                                      | T             | 286167 | NA    | NA       | NA    | -0.449168 | 0.098291 | -0.641819 | -0.256517 | 4.88E-06  | 0.000298  |
| Respiratory               | FEV1 ever smoked only strict                                           | T             | 136716 | NA    | NA       | NA    | -0.663217 | 0.148727 | -0.954722 | -0.371712 | 8.22E-06  | 0.000489  |
| Operations and Procedures | Ureteric surgery (self-reported)                                       | T             | 379101 | 604   | 378497   | 13.4  | 2.59432   | 0.58543  | 4.25      | 42.2      | 9.36E-06  | 0.000544  |
| Medication                | Adrenergics for systemic use                                           | T             | 379101 | 22332 | 356769   | 2.83  | 1.04028   | 0.236892 | 1.78      | 4.5       | 1.13E-05  | 0.000639  |
| Respiratory               | FEV1 maximumValue strict                                               | T             | 221665 | NA    | NA       | NA    | -0.469259 | 0.110836 | -0.686498 | -0.25202  | 2.30E-05  | 0.001272  |
| Anthropometry             | Standing height                                                        | T             | 378247 | NA    | NA       | NA    | 0.344496  | 0.082736 | 0.182334  | 0.506658  | 3.13E-05  | 0.001694  |
| Biological assays         | Red blood cell erythrocyte count                                       | T             | 367863 | NA    | NA       | NA    | 0.337645  | 0.084064 | 0.17288   | 0.50241   | 5.91E-05  | 0.003125  |
| Biological assays         | Mean spheroid cell volume                                              | T             | 361769 | NA    | NA       | NA    | 0.337383  | 0.08503  | 0.170725  | 0.504041  | 7.25E-05  | 0.003754  |
| Digestive system          | Pancreatitis (HES and self-reported)                                   | T             | 379101 | 2304  | 376797   | 6.07  | 1.80395   | 0.456482 | 2.48      | 14.9      | 7.76E-05  | 0.003929  |
| Digestive system          | Pancreatic disease (HES and self-reported)                             | T             | 379101 | 2413  | 376688   | 5.79  | 1.75608   | 0.456633 | 2.37      | 14.2      | 0.00012   | 0.005891  |
| Respiratory               | Pneumonia (HES and self-reported)                                      | T             | 379101 | 13446 | 365655   | 2.98  | 1.09042   | 0.283694 | 1.71      | 5.19      | 0.000121  | 0.005891  |
| Summary                   | Other diseases of the respiratory system (HES)                         | T             | 379101 | 4856  | 374245   | 4.1   | 1.41056   | 0.390923 | 1.9       | 8.82      | 0.000308  | 0.013848  |
| Cardiovascular            | Other disorders of veins (HES)                                         | T             | 379101 | 415   | 378686   | 13.2  | 2.58366   | 0.715184 | 3.26      | 53.8      | 0.000303  | 0.013848  |
| Digestive system          | Acute pancreatitis (HES)                                               | T             | 379101 | 1763  | 377338   | 6.29  | 1.83819   | 0.508416 | 2.32      | 17        | 0.0003    | 0.013848  |
| Haematology               | Polycythemia vera (HES and self-reported)                              | T             | 379101 | 393   | 378708   | 13.3  | 2.58713   | 0.716571 | 3.26      | 54.1      | 0.000306  | 0.013848  |
| Biological assays         | Platelet count                                                         | T             | 367861 | NA    | NA       | NA    | -0.295484 | 0.084168 | -0.460453 | -0.130515 | 0.000447  | 0.019709  |
| Biological assays         | Platelet crit                                                          | T             | 367858 | NA    | NA       | NA    | -0.290828 | 0.08416  | -0.455782 | -0.125874 | 0.000549  | 0.023766  |
| Respiratory               | Other respiratory disorders (HES)                                      | T             | 379101 | 2907  | 376194   | 4.8   | 1.56886   | 0.457732 | 1.96      | 11.8      | 0.000609  | 0.025207  |
| Respiratory               | Respiratory failure (HES and self-reported)                            | T             | 379101 | 1951  | 377150   | 5.79  | 1.75557   | 0.511366 | 2.12      | 15.8      | 0.000597  | 0.025207  |
| Respiratory               | Spontaneous pneumothoraxrecurrent pneumothorax (HES and self-reported) | T             | 379101 | 1034  | 378067   | 7.46  | 2.00949   | 0.586653 | 2.36      | 23.6      | 0.000614  | 0.025207  |
| Haematology               | Myeloproliferative disorder (HES and self-reported)                    | T             | 379101 | 455   | 378646   | 11.6  | 2.44788   | 0.716259 | 2.84      | 47.1      | 0.000632  | 0.025495  |
| Medication                | Intestinal antiinflammatory agents                                     | T             | 379101 | 25513 | 353588   | 2.28  | 0.822325  | 0.241521 | 1.42      | 3.65      | 0.000662  | 0.026278  |
| Respiratory               | Asthma (HES and self-reported)                                         | T             | 379101 | 48549 | 330552   | 1.96  | 0.671757  | 0.200967 | 1.32      | 2.9       | 0.00083   | 0.032393  |
| Operations and Procedures | Excision of lesion of organ NOC                                        | T             | 379101 | 2108  | 376993   | 5.35  | 1.67746   | 0.507981 | 1.98      | 14.5      | 0.000959  | 0.036254  |
| Cardiovascular            | Cerebral aneurysm (HES and self-reported)                              | T             | 379101 | 545   | 378556   | 10.6  | 2.35938   | 0.714364 | 2.61      | 42.9      | 0.000957  | 0.036254  |
| Summary                   | Metabolic disorders (HES)                                              | T             | 379101 | 39911 | 339190   | 2.07  | 0.729215  | 0.221517 | 1.34      | 3.2       | 0.000995  | 0.036633  |
| Respiratory               | GOLD tobii                                                             | T             | 18309  | NA    | NA       | NA    | 0.989849  | 0.300819 | 0.400244  | 1.57945   | 0.001     | 0.036633  |
| Operations and Procedures | High cost neurology drugs                                              | T             | 379101 | 1209  | 377892   | 6.77  | 1.91178   | 0.584733 | 2.15      | 21.3      | 0.001077  | 0.038869  |
| Medication                | Calcium                                                                | T             | 379101 | 6050  | 373051   | 3.62  | 1.28717   | 0.394623 | 1.67      | 7.85      | 0.00107   | 0.039348  |
| Respiratory               | Pneumonia organism unspecified (HES)                                   | T             | 379101 | 8203  | 370898   | 3.09  | 1.12732   | 0.34749  | 1.56      | 6.1       | 0.001178  | 0.041245  |
| Cancer                    | Large bowel cancer colorectal cancer (self-reported)                   | T             | 379101 | 526   | 378575   | 10    | 2.30443   | 0.716816 | 2.46      | 40.8      | 0.001305  | 0.045041  |
| Cardiovascular            | Congenital malformations of cardiac septa (HES)                        | T             | 379101 | 521   | 378580   | 9.81  | 2.28345   | 0.713913 | 2.42      | 39.8      | 0.001381  | 0.04699   |
| Cardiovascular            | Other cerebrovascular diseases (HES)                                   | T             | 379101 | 2188  | 376913   | 5.09  | 1.62658   | 0.510896 | 1.87      | 13.8      | 0.001454  | 0.048747  |
| Cardiovascular            | Mitral valve prolapse (HES and self-reported)                          | T             | 379101 | 545   | 378556   | 9.68  | 2.26977   | 0.714999 | 2.38      | 39.3      | 0.001501  | 0.049635  |
| Medication                | Antacids                                                               | T             | 379101 | 6182  | 372919   | 3.45  | 1.23713   | 0.392166 | 1.6       | 7.43      | 0.001607  | 0.052421  |
| Other                     | Birth weight                                                           | T             | 215536 | NA    | NA       | NA    | -0.335143 | 0.108465 | -0.547734 | -0.122552 | 0.002002  | 0.064426  |
| Immuno-inflammation       | Chronic skin ulcers (HES and self-reported)                            | T             | 379101 | 1331  | 377770   | 6.08  | 1.80545   | 0.586385 | 1.93      | 19.2      | 0.002077  | 0.065949  |
| Cardiovascular            | High cholesterol (HES and self-reported)                               | T             | 379101 | 62396 | 316705   | 0.362 | -0.10528  | 0.334083 | 0.188     | 0.697     | 0.002374  | 0.074361  |
| Summary                   | Other diseases of pleura (HES)                                         | T             | 379101 | 6040  | 373061   | 3.21  | 1.16713   | 0.391468 | 1.49      | 6.92      | 0.002869  | 0.088574  |
| Respiratory               | FEV1 FVC ratio never smoked only strict                                | T             | 84281  | NA    | NA       | NA    | -0.495945 | 0.166538 | -0.822359 | -0.169531 | 0.002902  | 0.088574  |
| Summary                   | Influenza and pneumonia (HES)                                          | T             | 379101 | 9013  | 370088   | 2.8   | 1.03013   | 0.34725  | 1.42      | 5.53      | 0.003012  | 0.090748  |
| Operations and Procedures | Extripation of nail bed                                                | T             | 379101 | 679   | 378422   | 8.29  | 2.11473   | 0.713772 | 2.05      | 33.6      | 0.003049  | 0.090748  |
| Summary                   | Diseases of male genital organs (HES)                                  | T             | 379101 | 17819 | 361282   | 2.39  | 0.873052  | 0.296203 | 1.34      | 4.28      | 0.003204  | 0.094174  |
| Summary                   | Deforming dorsopathies (HES)                                           | T             | 379101 | 2539  | 376562   | 4.42  | 1.48584   | 0.509335 | 1.63      | 12        | 0.003532  | 0.102547  |
| Summary                   | Disorders of gallbladder biliary tract and pancreas (HES)              | T             | 379101 | 16365 | 362736   | 2.34  | 0.850561  | 0.292807 | 1.32      | 4.16      | 0.003674  | 0.105403  |
| Digestive system          | Liver failurecirrhosis (HES and self-reported)                         | T             | 379101 | 1525  | 377576   | 5.45  | 1.69614   | 0.585817 | 1.73      | 17.2      | 0.003787  | 0.107355  |
| Medication                | Other systemic drugs for obstructive airway diseases                   | T             | 379101 | 21417 | 357684   | 2.15  | 0.766109  | 0.265836 | 1.28      | 3.62      | 0.003953  | 0.108185  |
| Operations and Procedures | Diagnostic imaging procedures                                          | T             | 379101 | 15463 | 363638   | 2.32  | 0.843638  | 0.292428 | 1.31      | 4.12      | 0.003915  | 0.108185  |
| Musculoskeletal           | BMD Combined                                                           | T             | 338180 | NA    | NA       | NA    | -0.249095 | 0.086357 | -0.418354 | -0.079836 | 0.003921  | 0.108185  |
| Cardiovascular            | Subarachnoid haemorrhage (HES)                                         | T             | 379101 | 743   | 378358   | 7.78  | 2.05099   | 0.71369  | 1.92      | 31.5      | 0.004056  | 0.108504  |
| Medication                | Macrolides lincosamides and strept                                     |               |        |       |          |       |           |          |           |           |           |           |

|                           |                                                                      |   |        |        |        |       |           |          |           |           |          |          |
|---------------------------|----------------------------------------------------------------------|---|--------|--------|--------|-------|-----------|----------|-----------|-----------|----------|----------|
| NA                        | Pediatric asthma under16yo (self-reported)                           | T | 350577 | 15307  | 335270 | 2.17  | 0.776859  | 0.30488  | 1.2       | 3.95      | 0.010832 | 0.228235 |
| Cardiovascular            | Subarachnoid haemorrhage (HES and self-reported)                     | T | 379101 | 936    | 378165 | 6.06  | 1.80223   | 0.71331  | 1.5       | 24.5      | 0.011518 | 0.240567 |
| Symptoms                  | Voice disturbances (HES)                                             | T | 379101 | 934    | 378167 | 6.03  | 1.79672   | 0.713908 | 1.49      | 24.4      | 0.011844 | 0.245231 |
| Cardiovascular            | Atrial fibrillation (HES and self-reported)                          | T | 379101 | 2928   | 376173 | 3.62  | 1.28638   | 0.512621 | 1.33      | 9.89      | 0.012093 | 0.248225 |
| Operations and Procedures | Release of fascia                                                    | T | 379101 | 204    | 378897 | 12.3  | 2.51273   | 1.00666  | 1.72      | 88.7      | 0.012557 | 0.255536 |
| Haematology               | Acute posthaemorrhagic anaemia (HES)                                 | T | 379101 | 226    | 378875 | 12    | 2.48906   | 1.00674  | 1.68      | 86.7      | 0.013421 | 0.270815 |
| NA                        | Subarachnoid haemorrhage                                             | T | 379101 | 982    | 378119 | 5.8   | 1.75793   | 0.713351 | 1.43      | 23.5      | 0.013727 | 0.274655 |
| Medication                | Blood glucose lowering drugs excl insulins                           | T | 379101 | 49513  | 329588 | 0.426 | -0.854162 | 0.35093  | 0.214     | 0.847     | 0.014933 | 0.28219  |
| Summary                   | Diseases of liver (HES)                                              | T | 379101 | 4603   | 374498 | 3.04  | 1.11156   | 0.465602 | 1.24      | 7.44      | 0.014894 | 0.28219  |
| Operations and Procedures | Incision of eyelid                                                   | T | 379101 | 241    | 378860 | 11.6  | 2.45288   | 1.0064   | 1.62      | 83.5      | 0.014798 | 0.28219  |
| Operations and Procedures | Diagnostic microendoscopic examination of larynx                     | T | 379101 | 246    | 378855 | 11.7  | 2.46335   | 1.00757  | 1.63      | 84.6      | 0.014492 | 0.28219  |
| Operations and Procedures | Diagnostic echocardiography                                          | T | 379101 | 8855   | 370246 | 2.45  | 0.898065  | 0.367569 | 1.19      | 5.05      | 0.014556 | 0.28219  |
| Respiratory               | Pneumothorax (HES and self-reported)                                 | T | 379101 | 906    | 378195 | 5.69  | 1.73951   | 0.714283 | 1.4       | 23.1      | 0.014878 | 0.28219  |
| Biological assays         | Reticulocyte percentage                                              | T | 361768 | NA     | NA     | NA    | -0.208663 | 0.085114 | -0.375487 | -0.041839 | 0.014224 | 0.28219  |
| Operations and Procedures | Incision of sclera                                                   | T | 379101 | 216    | 378885 | 11.6  | 2.45135   | 1.00848  | 1.61      | 83.8      | 0.015069 | 0.282507 |
| Other                     | DIED                                                                 | T | 379101 | 10919  | 368182 | 2.34  | 0.849427  | 0.350112 | 1.18      | 4.64      | 0.01526  | 0.283852 |
| Genitourinary             | Hyperplasia of prostate (HES)                                        | T | 379101 | 10244  | 368857 | 2.44  | 0.891336  | 0.369212 | 1.18      | 5.03      | 0.015772 | 0.291104 |
| Neurosciences             | Back pain for 3 months vs no pain                                    | T | 341531 | 65312  | 276219 | 0.494 | -0.704411 | 0.29296  | 0.278     | 0.878     | 0.016196 | 0.296643 |
| Genitourinary             | Prostate problem not cancer (HES and self-reported)                  | T | 379101 | 11913  | 367188 | 2.33  | 0.847397  | 0.353098 | 1.17      | 4.66      | 0.016164 | 0.298079 |
| Digestive system          | Other diseases of pancreas (HES)                                     | T | 379101 | 1002   | 378099 | 5.44  | 1.69393   | 0.713639 | 1.34      | 22        | 0.017613 | 0.306861 |
| Immuno-inflammation       | Ulcer of lower limb (HES)                                            | T | 379101 | 989    | 378112 | 5.45  | 1.69496   | 0.715154 | 1.34      | 22.1      | 0.017785 | 0.306861 |
| Family history            | Chronic bronchitis emphysema (family history - mother)               | T | 357529 | 20553  | 336976 | 1.96  | 0.671889  | 0.282553 | 1.13      | 3.41      | 0.01741  | 0.306861 |
| Operations and Procedures | Other operations on peripheral nerve                                 | T | 379101 | 2062   | 377039 | 4     | 1.38601   | 0.584192 | 1.27      | 12.6      | 0.017667 | 0.306861 |
| Operations and Procedures | Secondary open reduction of fracture of bone                         | T | 379101 | 1013   | 378088 | 5.49  | 1.70272   | 0.713669 | 1.36      | 22.2      | 0.017039 | 0.306861 |
| Operations and Procedures | Harvest of random pattern flap of skin from limb                     | T | 379101 | 233    | 378868 | 10.9  | 2.38973   | 1.0073   | 1.52      | 78.6      | 0.017672 | 0.306861 |
| Eye                       | LogMAR final right                                                   | T | 84003  | NA     | NA     | NA    | -0.400333 | 0.168893 | -0.731363 | -0.069303 | 0.017772 | 0.306861 |
| Infectious disease        | Bacterial agents as the cause of diseases (HES)                      | T | 379101 | 7935   | 371166 | 2.51  | 0.920608  | 0.389321 | 1.17      | 5.39      | 0.018047 | 0.309136 |
| Immuno-inflammation       | Nail disorders (HES)                                                 | T | 379101 | 1050   | 378051 | 5.33  | 1.67291   | 0.713216 | 1.32      | 21.6      | 0.018997 | 0.32079  |
| NA                        | Adult only asthma over16yo (self-reported)                           | T | 367188 | 31918  | 335270 | 1.79  | 0.583046  | 0.248518 | 1.1       | 2.92      | 0.018972 | 0.32079  |
| Summary                   | HESCH Certain infectious and parasitic diseases BIN (HES)            | T | 379101 | 26714  | 352387 | 1.83  | 0.603365  | 0.259367 | 1.1       | 3.04      | 0.020003 | 0.330736 |
| Operations and Procedures | Percutaneous examination of bile duct                                | T | 379101 | 260    | 378841 | 10.4  | 2.34286   | 1.00659  | 1.45      | 74.9      | 0.019937 | 0.330736 |
| Cardiovascular            | Cholesterol lowering medication                                      | T | 376222 | 64923  | 311299 | 0.507 | -0.67952  | 0.291517 | 0.286     | 0.897     | 0.019755 | 0.330736 |
| Operations and Procedures | Plastic operations on cornea                                         | T | 379101 | 258    | 378843 | 10.3  | 2.33678   | 1.006    | 1.44      | 74.3      | 0.020188 | 0.331498 |
| Neurosciences             | Parkinson's disease (HES)                                            | T | 379101 | 1054   | 378047 | 5.25  | 1.65783   | 0.71687  | 1.29      | 21.4      | 0.020745 | 0.332122 |
| Respiratory               | Pleural effusion (HES)                                               | T | 379101 | 4725   | 374376 | 2.89  | 1.06222   | 0.458139 | 1.18      | 7.1       | 0.020419 | 0.332122 |
| Cardiovascular            | Varicose vein surgery (self-reported)                                | T | 379101 | 15382  | 363719 | 2.08  | 0.732684  | 0.316653 | 1.12      | 3.87      | 0.020677 | 0.332122 |
| Operations and Procedures | Extirpation of scrotum                                               | T | 379101 | 239    | 378862 | 10.3  | 2.33475   | 1.00989  | 1.43      | 74.7      | 0.020784 | 0.332122 |
| Operations and Procedures | Recession of muscle of eye                                           | T | 379101 | 270    | 378831 | 10.2  | 2.32123   | 1.0059   | 1.42      | 73.2      | 0.021021 | 0.333667 |
| Medication                | Lipid modifying agents combinations                                  | T | 379101 | 72923  | 306178 | 0.54  | -0.616855 | 0.268589 | 0.319     | 0.914     | 0.021639 | 0.341205 |
| Operations and Procedures | Other diagnostic tests                                               | T | 379101 | 994    | 378107 | 5.08  | 1.62578   | 0.714074 | 1.25      | 20.6      | 0.0228   | 0.357155 |
| Summary                   | Symptoms and signs involving the skin and subcutaneous tissue (HES)  | T | 379101 | 6510   | 372591 | 2.56  | 0.941261  | 0.417373 | 1.13      | 5.81      | 0.024121 | 0.366279 |
| Cardiovascular            | Nonrheumatic mitral valve disorders (HES)                            | T | 379101 | 2168   | 376933 | 3.75  | 1.32291   | 0.586669 | 1.19      | 11.9      | 0.024137 | 0.366279 |
| Digestive system          | Other diseases of jaws (HES)                                         | T | 379101 | 301    | 378800 | 9.7   | 2.27191   | 1.00577  | 1.35      | 69.6      | 0.023892 | 0.366279 |
| ENT                       | Dental tooth surgery (self-reported)                                 | T | 379101 | 999    | 378102 | 4.99  | 1.60748   | 0.71365  | 1.23      | 20.2      | 0.024292 | 0.366279 |
| Operations and Procedures | Operations on canthus                                                | T | 379101 | 1131   | 377970 | 5.02  | 1.61357   | 0.713849 | 1.24      | 20.3      | 0.023798 | 0.366279 |
| Respiratory               | Pleural effusion (HES and self-reported)                             | T | 379101 | 4887   | 374214 | 2.81  | 1.03192   | 0.458172 | 1.14      | 6.89      | 0.024306 | 0.366279 |
| Mental health             | Mental and behavioural disorders due to use of alcohol (HES)         | T | 379101 | 4907   | 374194 | 2.81  | 1.03424   | 0.460887 | 1.14      | 6.94      | 0.024831 | 0.366955 |
| Operations and Procedures | Excision of gall bladder                                             | T | 379101 | 12079  | 367022 | 2.18  | 0.77793   | 0.366656 | 1.1       | 4.29      | 0.024826 | 0.366955 |
| Operations and Procedures | Revisional decompression operations on lumbar spine                  | T | 379101 | 287    | 378814 | 9.54  | 2.25594   | 1.00626  | 1.33      | 68.6      | 0.024967 | 0.366955 |
| Musculoskeletal           | Bursitis (HES and self-reported)                                     | T | 379101 | 2169   | 376932 | 3.71  | 1.31186   | 0.584149 | 1.18      | 11.7      | 0.024719 | 0.366955 |
| Operations and Procedures | Harvest of other multiple tissue                                     | T | 379101 | 281    | 378820 | 9.47  | 2.24849   | 1.00681  | 1.32      | 68.2      | 0.025531 | 0.372233 |
| Musculoskeletal           | Scoliosis (HES and self-reported)                                    | T | 379101 | 1135   | 377966 | 4.93  | 1.5954    | 0.7149   | 1.21      | 20        | 0.025639 | 0.372233 |
| Cardiovascular            | Other venous/lymphatic disease (HES and self-reported)               | T | 379101 | 1107   | 377994 | 4.9   | 1.58949   | 0.713202 | 1.21      | 19.8      | 0.025836 | 0.372816 |
| Operations and Procedures | Removal of epididymal cyst (self-reported)                           | T | 379101 | 269    | 378832 | 9.28  | 2.22828   | 1.00716  | 1.29      | 66.8      | 0.026937 | 0.38594  |
| Biological assays         | High light scatter reticulocyte count                                | T | 361768 | NA     | NA     | NA    | -0.188124 | 0.085104 | -0.354928 | -0.02132  | 0.027069 | 0.38594  |
| Summary                   | Congenital malformations of the circulatory system (HES)             | T | 379101 | 1083   | 378018 | 4.83  | 1.57402   | 0.712897 | 1.19      | 19.5      | 0.02725  | 0.386205 |
| Respiratory               | Pyothorax (HES)                                                      | T | 379101 | 288    | 378813 | 9.01  | 2.19815   | 1.00651  | 1.25      | 64.8      | 0.028967 | 0.407326 |
| Operations and Procedures | Anaesthetic without surgery                                          | T | 379101 | 299    | 378802 | 8.99  | 2.19586   | 1.00618  | 1.25      | 64.6      | 0.029083 | 0.407326 |
| Summary                   | Diseases of arteries arterioles and capillaries (HES)                | T | 379101 | 6751   | 372350 | 2.51  | 0.918419  | 0.421749 | 1.1       | 5.73      | 0.029433 | 0.409819 |
| Operations and Procedures | Liver surgery (self-reported)                                        | T | 379101 | 301    | 378800 | 8.86  | 2.18191   | 1.00581  | 1.23      | 63.6      | 0.030059 | 0.416105 |
| Operations and Procedures | Therapeutic endoscopic operations on pleura                          | T | 379101 | 310    | 378791 | 8.8   | 2.17437   | 1.00652  | 1.22      | 63.3      | 0.030751 | 0.423219 |
| Respiratory               | Empyema (HES and self-reported)                                      | T | 379101 | 299    | 378802 | 8.73  | 2.16647   | 1.00641  | 1.21      | 62.7      | 0.031345 | 0.428925 |
| Digestive system          | Incisional hernia (HES and self-reported)                            | T | 379101 | 307    | 378794 | 8.69  | 2.16257   | 1.00593  | 1.21      | 62.4      | 0.03157  | 0.429531 |
| Metabolic                 | Disorders of lipoprotein metabolism and other lipidaemias (HES)      | T | 379101 | 32636  | 346465 | 0.374 | -0.984125 | 0.45975  | 0.152     | 0.92      | 0.032309 | 0.435566 |
| Operations and Procedures | Gallstones removed (self-reported)                                   | T | 379101 | 315    | 378786 | 8.61  | 2.15332   | 1.00743  | 1.2       | 62        | 0.032562 | 0.435566 |
| Mental health             | Postnatal depression (HES and self-reported)                         | T | 379101 | 311    | 378790 | 8.68  | 2.16119   | 1.01061  | 1.2       | 62.9      | 0.032477 | 0.435566 |
| Neurosciences             | Parkinson's disease (HES and self-reported)                          | T | 379101 | 1191   | 377910 | 4.61  | 1.52717   | 0.716688 | 1.13      | 18.8      | 0.0331   | 0.440285 |
| Respiratory               | Unspecified acute lower respiratory infection (HES)                  | T | 379101 | 6878   | 372223 | 2.44  | 0.890133  | 0.418963 | 1.07      | 5.54      | 0.033619 | 0.440342 |
| Operations and Procedures | External resuscitation                                               | T | 379101 | 3496   | 375605 | 2.98  | 1.09119   | 0.513711 | 1.09      | 8.15      | 0.033659 | 0.440342 |
| Other                     | Alcohol dependency (HES and self-reported)                           | T | 379101 | 5185   | 373916 | 2.67  | 0.980374  | 0.460919 | 1.08      | 6.58      | 0.03342  | 0.440342 |
| Operations and Procedures | Examination of oesophagus                                            | T | 379101 | 1296   | 377805 | 4.5   | 1.50464   | 0.714182 | 1.11      | 18.3      | 0.035134 | 0.457129 |
| Family history            | Chronic bronchitis emphysema (family history)                        | T | 379101 | NA     | NA     | NA    | 0.174729  | 0.083176 | 0.011703  | 0.337755  | 0.035667 | 0.461543 |
| Medication                | Antipsoritics for topical use                                        | T | 379101 | 1197   | 377904 | 4.42  | 1.48526   | 0.713443 | 1.09      | 17.9      | 0.037358 | 0.473287 |
| Cancer                    | Skin cancer (self-reported)                                          | T | 379101 | 1189   | 377912 | 4.43  | 1.48877   | 0.714906 | 1.09      | 18        | 0.037299 | 0.473287 |
| Cardiovascular            | Leg claudication intermittent claudication (HES and self-reported)   | T | 379101 | 2468   | 376633 | 3.43  | 1.23195   | 0.590667 | 1.08      | 10.9      | 0.037006 | 0.473287 |
| Other                     | Pack years                                                           | T | 110918 | NA     | NA     | NA    | -0.406884 | 0.195458 | -0.789982 | -0.023786 | 0.03737  | 0.473287 |
| Summary                   | Other acute lower respiratory infections (HES)                       | T | 379101 | 7023   | 372078 | 2.38  | 0.86796   | 0.418913 | 1.05      | 5.41      | 0.038271 | 0.479601 |
| Cardiovascular            | Aortic aneurysm and dissection (HES)                                 | T | 379101 | 1199   | 377902 | 4.46  | 1.49575   | 0.721875 | 1.08      | 18.4      | 0.038262 | 0.479601 |
| Operations and Procedures | Other operations on blood vessel                                     | T | 379101 | 317    | 378784 | 8     | 2.07943   | 1.00733  | 1.11      | 57.6      | 0.038989 | 0.486041 |
| Neurosciences             | Alzheimer's disease (HES)                                            | T | 379101 | 359    | 378742 | 7.94  | 2.07186   | 1.01005  | 1.1       | 57.5      | 0.040243 | 0.496675 |
| Cardiovascular            | Endocarditis valve unspecified (HES)                                 | T | 379101 | 363    | 378738 | 7.88  | 2.06459   | 1.00659  | 1.1       | 56.7      | 0.04026  | 0.496675 |
| Family history            | Heart disease (family history - father)                              | T | 343592 | 109130 | 234462 | 0.657 | -0.419799 | 0.205104 | 0.44      | 0.982     | 0.040681 | 0.49673  |
| Cardiovascular            | Aortic aneurysm (HES and self-reported)                              | T | 379101 | 1220   | 377881 | 4.38  | 1.47773   | 0.721841 | 1.06      | 18        | 0.040641 | 0.49673  |
| Summary                   | HESCH Endocrine nutritional and metabolic diseases BIN (HES)         | T | 379101 | 66768  | 312333 | 1.51  | 0.410243  | 0.209979 | 1.02      | 2.23      | 0.041228 | 0.500838 |
| Operations and Procedures | Partial excision of liver                                            | T | 379101 | 334    | 378767 | 7.75  | 2.04763   | 1.00633  | 1.08      | 55.7      | 0.041877 | 0.503578 |
| Metabolic                 | Thyroid problem not cancer (HES and self-reported)                   | T | 379101 | 1330   | 377771 | 4.29  | 1.45545   | 0.715232 | 1.06      | 17.4      | 0.041857 | 0.503578 |
| Digestive system          | Peptic ulcer site unspecified (HES)                                  | T | 379101 | 370    | 378731 | 7.66  | 2.03622   | 1.00834  | 1.06      | 55.3      | 0.043448 | 0.519843 |
| Operations and Procedures | Other excision of appendix                                           | T | 379101 | 1270   | 377831 | 4.21  | 1.43746   | 0.712959 | 1.04      | 17        | 0.04378  | 0.5212   |
| Summary                   | Suppurative and necrotic conditions of lower respiratory tract (HES) | T | 379101 | 346    | 378755 | 7.57  | 2.0246    | 1.00617  | 1.05      | 54.4      | 0.044201 | 0.523478 |
| Digestive system          | Cholelithiasis (H                                                    |   |        |        |        |       |           |          |           |           |          |          |

|                            |                                                                           |   |        |        |        |       |           |          |           |          |          |          |
|----------------------------|---------------------------------------------------------------------------|---|--------|--------|--------|-------|-----------|----------|-----------|----------|----------|----------|
| Symptoms                   | Ascites (HES)                                                             | T | 379101 | 1446   | 377655 | 3.8   | 1.33473   | 0.713333 | 0.939     | 15.4     | 0.061329 | 0.637662 |
| Digestive system           | Liver/biliary/pancreas problem (HES and self-reported)                    | T | 379101 | 4283   | 374818 | 2.59  | 0.951177  | 0.508218 | 0.956     | 7.01     | 0.061263 | 0.637662 |
| Infectious disease         | Zoster (HES)                                                              | T | 379101 | 425    | 378676 | 6.55  | 1.87905   | 1.00584  | 0.912     | 47       | 0.061742 | 0.639316 |
| Biological assays          | Immature reticulocyte fraction                                            | T | 361768 | NA     | NA     | NA    | -0.158043 | 0.084985 | -0.324614 | 0.008528 | 0.062935 | 0.648694 |
| Operations and Procedures  | Incision of capsule of lens                                               | T | 379101 | 1497   | 377604 | 3.75  | 1.32261   | 0.715894 | 0.923     | 15.3     | 0.064675 | 0.660909 |
| Mental health              | Ever unenthusiastic/disinterested for a whole week                        | T | 121405 | 44857  | 76548  | 0.583 | -0.539354 | 0.291694 | 0.329     | 1.03     | 0.064452 | 0.660909 |
| Medication                 | Corticosteroids combinations with antibiotics                             | T | 379101 | 20857  | 358244 | 1.71  | 0.536403  | 0.291184 | 0.966     | 3.03     | 0.065454 | 0.666006 |
| Operations and Procedures  | Image controlled operations on abdominal cavity                           | T | 379101 | 419    | 378682 | 6.34  | 1.84663   | 1.00527  | 0.884     | 45.5     | 0.066217 | 0.670905 |
| Digestive system           | Unspecified appendicitis (HES)                                            | T | 379101 | 412    | 378689 | 6.26  | 1.8336    | 1.00541  | 0.872     | 44.9     | 0.068192 | 0.682461 |
| Medication                 | Hormone antagonists and related agents                                    | T | 379101 | 2999   | 376102 | 2.93  | 1.07612   | 0.589661 | 0.923     | 9.32     | 0.068004 | 0.682461 |
| Medication                 | Vitamin B                                                                 | T | 377036 | 15815  | 361221 | 0.164 | -1.80782  | 0.992391 | 0.0234    | 1.15     | 0.068504 | 0.682461 |
| Infectious disease         | Whooping cough pertussis (HES and self-reported)                          | T | 379101 | 415    | 378686 | 6.25  | 1.83319   | 1.00581  | 0.871     | 44.9     | 0.068365 | 0.682461 |
| Musculoskeletal            | Soft tissue disorders related to use overuse and pressure (HES)           | T | 379101 | 1500   | 377601 | 3.63  | 1.28852   | 0.712902 | 0.897     | 14.7     | 0.070696 | 0.695564 |
| Digestive system           | Bile duct disease (HES and self-reported)                                 | T | 379101 | 13856  | 365245 | 1.87  | 0.625991  | 0.3463   | 0.949     | 3.69     | 0.070661 | 0.695564 |
| Cardiovascular             | Primary hypertension I270                                                 | T | 379101 | 416    | 378685 | 6.18  | 1.82191   | 1.00683  | 0.859     | 44.5     | 0.070366 | 0.695564 |
| Family history             | High blood pressure (family history - father)                             | T | 343592 | 74698  | 268894 | 0.649 | -0.431596 | 0.239398 | 0.406     | 1.04     | 0.071414 | 0.698221 |
| Operations and Procedures  | Diagnostic endoscopic examination of lower bowel                          | T | 379101 | 29456  | 349645 | 0.44  | -0.820414 | 0.455291 | 0.18      | 1.07     | 0.071552 | 0.698221 |
| ENT                        | Nasalsinus disorder (HES and self-reported)                               | T | 379101 | 11324  | 367777 | 1.93  | 0.656002  | 0.364601 | 0.943     | 3.94     | 0.071982 | 0.699548 |
| Cardiovascular             | Other aneurysm (HES)                                                      | T | 379101 | 436    | 378665 | 6.09  | 1.80716   | 1.00664  | 0.847     | 43.8     | 0.072616 | 0.702843 |
| Mental health              | Overall health rating                                                     | T | 377441 | NA     | NA     | NA    | 0.149492  | 0.083363 | -0.0139   | 0.312884 | 0.072931 | 0.703031 |
| Musculoskeletal            | Fractured broken bones in last 5 years                                    | T | 377028 | 36458  | 340570 | 1.54  | 0.430829  | 0.24123  | 0.959     | 2.47     | 0.074105 | 0.70316  |
| Operations and Procedures  | Other operations on sympathetic nerve                                     | T | 379101 | 470    | 378631 | 6.04  | 1.79767   | 1.00501  | 0.842     | 43.3     | 0.073663 | 0.70316  |
| Operations and Procedures  | Other operations on maxillary antrum                                      | T | 379101 | 2872   | 376229 | 2.85  | 1.04613   | 0.584105 | 0.906     | 8.94     | 0.073295 | 0.70316  |
| Digestive system           | Gall bladder disease (HES and self-reported)                              | T | 379101 | 13958  | 365143 | 1.86  | 0.618528  | 0.346352 | 0.941     | 3.66     | 0.074126 | 0.70316  |
| Summary                    | Disorders of sclera cornea iris and ciliary body (HES)                    | T | 379101 | 1464   | 377637 | 3.56  | 1.27061   | 0.713108 | 0.881     | 14.4     | 0.074784 | 0.70526  |
| Operations and Procedures  | Removal of repair material from skin                                      | T | 379101 | 460    | 378641 | 5.99  | 1.78979   | 1.00503  | 0.835     | 42.9     | 0.074939 | 0.70526  |
| Respiratory                | Other disorders of nose and nasal sinuses (HES)                           | T | 379101 | 5991   | 373110 | 2.25  | 0.81111   | 0.456263 | 0.92      | 5.5      | 0.075449 | 0.707259 |
| Neurosciences              | Hip pain for 3 months vs no pain                                          | T | 362682 | 32691  | 329991 | 0.478 | -0.737719 | 0.418358 | 0.211     | 1.09     | 0.077839 | 0.726799 |
| Operations and Procedures  | Other operations on internal nose                                         | T | 379101 | 2843   | 376258 | 2.8   | 1.03058   | 0.585191 | 0.89      | 8.82     | 0.078221 | 0.727517 |
| Summary                    | Bacterial viral and other infectious agents (HES)                         | T | 379101 | 11829  | 367272 | 1.9   | 0.642204  | 0.365104 | 0.929     | 3.89     | 0.078584 | 0.727522 |
| Summary                    | Noninflammatory disorders of female genital tract (HES)                   | T | 379101 | 43955  | 335146 | 0.534 | -0.626863 | 0.357043 | 0.265     | 1.08     | 0.079138 | 0.727522 |
| Musculoskeletal            | Other deforming dorsopathies (HES)                                        | T | 379101 | 1558   | 377543 | 3.5   | 1.25329   | 0.713777 | 0.864     | 14.2     | 0.079112 | 0.727522 |
| Eye                        | Retinal vascular occlusions (HES)                                         | T | 379101 | 466    | 378635 | 5.84  | 1.76482   | 1.00688  | 0.812     | 42       | 0.079643 | 0.727528 |
| Operations and Procedures  | Removal of other substance from skin                                      | T | 379101 | 434    | 378667 | 5.82  | 1.76109   | 1.00511  | 0.811     | 41.7     | 0.07975  | 0.727528 |
| Summary                    | Had major operations                                                      | T | 173367 | 111364 | 62003  | 1.6   | 0.469253  | 0.268941 | 0.944     | 2.71     | 0.081017 | 0.736262 |
| Gynaecology and Obstetrics | Uterine problem (HES and self-reported)                                   | T | 379101 | 29689  | 349412 | 0.447 | -0.805553 | 0.463947 | 0.18      | 1.11     | 0.08251  | 0.746984 |
| Digestive system           | Other diseases of gallbladder (HES)                                       | T | 379101 | 1619   | 377482 | 3.43  | 1.23335   | 0.713363 | 0.848     | 13.9     | 0.083822 | 0.755986 |
| Operations and Procedures  | Ventilation support                                                       | T | 379101 | 2964   | 376137 | 2.75  | 1.01216   | 0.586358 | 0.872     | 8.68     | 0.084316 | 0.75757  |
| Operations and Procedures  | Total prosthetic replacement of hip joint using cement                    | T | 379101 | 4901   | 374200 | 2.42  | 0.885797  | 0.513827 | 0.886     | 6.64     | 0.084723 | 0.758362 |
| Haematology                | Diseases of spleen (HES)                                                  | T | 379101 | 463    | 378638 | 5.63  | 1.72816   | 1.00506  | 0.785     | 40.4     | 0.085529 | 0.762717 |
| Genitourinary              | Renal failure not requiring dialysis (HES and self-reported)              | T | 379101 | 483    | 378618 | 5.62  | 1.72568   | 1.00557  | 0.783     | 40.3     | 0.08614  | 0.765297 |
| Digestive system           | Other diseases of anus and rectum (HES)                                   | T | 379101 | 21218  | 357883 | 0.368 | -0.999652 | 0.583888 | 0.117     | 1.16     | 0.086885 | 0.768643 |
| Respiratory                | FEV1 FVC ratio never smoked only                                          | T | 109851 | NA     | NA     | NA    | -0.25205  | 0.147349 | -0.540854 | 0.036754 | 0.087162 | 0.768643 |
| Summary                    | HESCH Diseases of the blood forming organ immune mech BIN (HES)           | T | 379101 | 22345  | 356756 | 1.64  | 0.497231  | 0.291836 | 0.928     | 2.91     | 0.088418 | 0.771145 |
| Operations and Procedures  | Operations on turbinate of nose                                           | T | 379101 | 2985   | 376116 | 2.71  | 0.99654   | 0.584497 | 0.862     | 8.52     | 0.088203 | 0.771145 |
| Operations and Procedures  | Primary fusion of other joint of spine                                    | T | 379101 | 465    | 378636 | 5.55  | 1.71407   | 1.00521  | 0.774     | 39.8     | 0.088159 | 0.771145 |
| Symptoms                   | Rash and other nonspecific skin eruption (HES)                            | T | 379101 | 1635   | 377466 | 3.35  | 1.20988   | 0.712829 | 0.829     | 13.6     | 0.089642 | 0.771305 |
| Operations and Procedures  | Diagnostic lower respiratory tract                                        | T | 379101 | 4809   | 374292 | 2.38  | 0.865439  | 0.509684 | 0.875     | 6.45     | 0.089509 | 0.771305 |
| Operations and Procedures  | Other diagnostic imaging of vascular system                               | T | 379101 | 2957   | 376144 | 2.7   | 0.994041  | 0.585014 | 0.858     | 8.51     | 0.089286 | 0.771305 |
| Biological assays          | Microalbumin in urine                                                     | T | 114296 | NA     | NA     | NA    | -0.235276 | 0.138657 | -0.507044 | 0.036492 | 0.089732 | 0.771305 |
| Respiratory                | Nasal polyp (HES)                                                         | T | 379101 | 2942   | 376159 | 2.69  | 0.990506  | 0.585259 | 0.855     | 8.48     | 0.090565 | 0.773486 |
| Biological assays          | White blood cell leukocyte count                                          | T | 367858 | NA     | NA     | NA    | -0.142424 | 0.084172 | -0.307402 | 0.022554 | 0.090635 | 0.773486 |
| Other                      | Getting up in morning                                                     | T | 378063 | NA     | NA     | NA    | -0.14059  | 0.083349 | -0.303954 | 0.022774 | 0.09165  | 0.779351 |
| Neurosciences              | Hip pain                                                                  | T | 378231 | 48240  | 329991 | 0.59  | -0.527772 | 0.314409 | 0.319     | 1.09     | 0.093227 | 0.788288 |
| Genitourinary              | Enlarged prostate (HES and self-reported)                                 | T | 379101 | 13062  | 366039 | 1.86  | 0.620536  | 0.369825 | 0.901     | 3.84     | 0.093363 | 0.788288 |
| Cardiovascular             | Leg artery angioplasty stent (self-reported)                              | T | 379101 | 443    | 378658 | 5.43  | 1.69178   | 1.01059  | 0.749     | 39.4     | 0.09412  | 0.788362 |
| Operations and Procedures  | Other operations on retina                                                | T | 379101 | 498    | 378603 | 5.37  | 1.67998   | 1.0063   | 0.746     | 38.6     | 0.095027 | 0.788362 |
| Medication                 | Glucosamine                                                               | T | 377850 | 73561  | 304289 | 0.665 | -0.407606 | 0.243785 | 0.413     | 1.07     | 0.094526 | 0.788362 |
| Cardiovascular             | Angina (HES and self-reported)                                            | T | 379101 | 20423  | 358678 | 0.374 | -0.984646 | 0.588132 | 0.118     | 1.18     | 0.094093 | 0.788362 |
| Eye                        | Iritis (HES and self-reported)                                            | T | 379101 | 479    | 378622 | 5.35  | 1.67786   | 1.00487  | 0.747     | 38.4     | 0.094972 | 0.788362 |
| Digestive system           | Other diseases of liver (HES)                                             | T | 379101 | 3122   | 375979 | 2.64  | 0.970318  | 0.584492 | 0.839     | 8.3      | 0.096893 | 0.797605 |
| Operations and Procedures  | Other operations on fallopian tube                                        | T | 379101 | 950    | 378151 | 5.45  | 1.6949    | 1.02089  | 0.736     | 40.3     | 0.096871 | 0.797605 |
| Biological assays          | Reticulocyte count                                                        | T | 361768 | NA     | NA     | NA    | -0.14122  | 0.085132 | -0.308078 | 0.025638 | 0.097146 | 0.797605 |
| Symptoms                   | Other symptoms and signs involving the digestive system and abdomen (HES) | T | 379101 | 13806  | 365295 | 0.193 | -1.64394  | 0.992317 | 0.0276    | 1.35     | 0.097587 | 0.798468 |
| Symptoms                   | Nausea and vomiting (HES)                                                 | T | 379101 | 10633  | 368468 | 1.9   | 0.640931  | 0.388402 | 0.887     | 4.06     | 0.098907 | 0.80123  |
| Medication                 | Antiinflammatory and antirheumatic products non steroids                  | T | 379101 | 86308  | 292793 | 0.69  | -0.370769 | 0.224347 | 0.445     | 1.07     | 0.098401 | 0.80123  |
| Neurosciences              | Peripheral nerve disorder (HES and self-reported)                         | T | 379101 | 16736  | 362365 | 0.309 | -1.17361  | 0.711969 | 0.0766    | 1.25     | 0.09927  | 0.80123  |
| Digestive system           | Anal problem (HES and self-reported)                                      | T | 379101 | 23889  | 355212 | 0.434 | -0.835548 | 0.506408 | 0.161     | 1.17     | 0.099854 | 0.80123  |
| Neurosciences              | Knee pain for 3 months vs no pain                                         | T | 354701 | 62522  | 292179 | 0.644 | -0.439752 | 0.267054 | 0.382     | 1.09     | 0.099624 | 0.801367 |
| Summary                    | Symptoms nervous and musculoskeletal systems (HES)                        | T | 379101 | 4763   | 374338 | 2.29  | 0.830502  | 0.508365 | 0.847     | 6.21     | 0.102328 | 0.802491 |
| Cardiovascular             | Angina pectoris (HES)                                                     | T | 379101 | 16491  | 362610 | 0.311 | -1.16808  | 0.714789 | 0.0766    | 1.26     | 0.102224 | 0.802491 |
| Musculoskeletal            | Other necrotizing vasculopathies (HES)                                    | T | 379101 | 542    | 378559 | 5.19  | 1.64674   | 1.00651  | 0.722     | 37.3     | 0.101823 | 0.802491 |
| Cancer                     | Rodent ulcer (self-reported)                                              | T | 379101 | 540    | 378561 | 5.19  | 1.64728   | 1.00617  | 0.723     | 37.3     | 0.101593 | 0.802491 |
| Operations and Procedures  | Blood withdrawal                                                          | T | 379101 | 3031   | 376070 | 2.6   | 0.956402  | 0.584281 | 0.828     | 8.18     | 0.101654 | 0.802491 |
| Metabolic                  | Thyroid goitre (HES and self-reported)                                    | T | 379101 | 1793   | 377308 | 3.22  | 1.16923   | 0.714835 | 0.793     | 13.1     | 0.101911 | 0.802491 |
| Biological assays          | Mean corpuscular haemoglobin                                              | T | 367860 | NA     | NA     | NA    | 0.137148  | 0.083983 | -0.027459 | 0.301755 | 0.10246  | 0.802491 |
| Respiratory                | FEV1 never smoked only strict                                             | T | 84281  | NA     | NA     | NA    | -0.272768 | 0.166279 | -0.598675 | 0.053139 | 0.100917 | 0.802491 |
| Operations and Procedures  | Rectal sigmoid resection (self-reported)                                  | T | 379101 | 534    | 378567 | 5.15  | 1.63941   | 1.0054   | 0.718     | 37       | 0.102974 | 0.803872 |
| Symptoms                   | Gangrene (HES)                                                            | T | 379101 | 510    | 378591 | 5.14  | 1.63675   | 1.00567  | 0.716     | 36.9     | 0.103626 | 0.806319 |
| Eye                        | Hordeolum and chalazion (HES)                                             | T | 379101 | 1665   | 377436 | 3.18  | 1.15741   | 0.712234 | 0.787     | 12.9     | 0.104397 | 0.807043 |
| Medication                 | Drugs affecting bone structure and mineralization                         | T | 379101 | 7218   | 371883 | 2.13  | 0.755425  | 0.464743 | 0.856     | 5.29     | 0.104063 | 0.807043 |
| Eye                        | Intra ocular pressure Goldmann correlated right                           | T | 81176  | NA     | NA     | NA    | -0.273691 | 0.169056 | -0.605041 | 0.057659 | 0.105461 | 0.81263  |
| Immuno-inflammation        | Granulomatous disorders of skin and subcutaneous tissue (HES)             | T | 379101 | 534    | 378567 | 5.04  | 1.61809   | 1.00479  | 0.704     | 36.1     | 0.107315 | 0.8229   |
| Gynaecology and Obstetrics | Uterine polypectomy uterine polyps removed (self-reported)                | T | 379101 | 529    | 378572 | 5.08  | 1.62446   | 1.00923  | 0.702     | 36.7     | 0.107485 | 0.8229   |
| Cardiovascular             | Other peripheral vascular diseases (HES)                                  | T | 379101 | 3304   | 375797 | 2.56  | 0.941595  | 0.586937 | 0.812     | 8.1      | 0.108658 | 0.828805 |
| Musculoskeletal            | Osteoporosis without pathological fracture (HES)                          | T | 379101 | 5396   | 373705 | 2.28  | 0.823023  | 0.514668 | 0.831     | 6.24     | 0.109791 | 0.828805 |
| Gynaecology and Obstetrics | Medical abortion (HES)                                                    | T | 379101 | 998    | 378103 | 5.14  | 1.63664   | 1.02385  | 0.691     | 38.2     | 0.109927 | 0.828805 |
| Other                      | Chest pain or discomfort when walking uphill or hurrying                  | T | 47258  | 12507  | 34751  | 2.15  | 0.765793  | 0.480095 | 0.839     | 5.51     | 0.110693 | 0.828805 |
| Operations and Procedures  | Diagnostic endoscopic examination of larynx                               | T | 379101 |        |        |       |           |          |           |          |          |          |

|                            |                                                                   |   |        |        |        |          |           |          |           |           |           |          |
|----------------------------|-------------------------------------------------------------------|---|--------|--------|--------|----------|-----------|----------|-----------|-----------|-----------|----------|
| Operations and Procedures  | Prosthetic replacement of other bone using cement                 | T | 379101 | 559    | 378542 | 4.63     | 1.53302   | 1.00617  | 0.645     | 33.3      | 0.127603  | 0.88619  |
| Immuno-inflammation        | Cellulitis (HES and self-reported)                                | T | 379101 | 6668   | 372433 | 2        | 0.693277  | 0.456408 | 0.818     | 4.89      | 0.128766  | 0.891255 |
| Eye                        | Other disorders of cornea (HES)                                   | T | 379101 | 582    | 378519 | 4.59     | 1.52448   | 1.00507  | 0.641     | 32.9      | 0.129319  | 0.892056 |
| Cardiovascular             | Diastolic blood pressure mean                                     | T | 357246 | NA     | NA     | NA       | 0.129927  | 0.085729 | -0.038101 | 0.297955  | 0.129631  | 0.892056 |
| Summary                    | HESCH Congen malfor deform and chrom abnormalities (HES)          | T | 379101 | 4981   | 374120 | 2.15     | 0.765167  | 0.507369 | 0.795     | 5.81      | 0.131527  | 0.89221  |
| Operations and Procedures  | Endoscopic ultrasound examination of pancreas                     | T | 379101 | 605    | 378496 | 4.57     | 1.51947   | 1.00507  | 0.637     | 32.8      | 0.130584  | 0.89221  |
| Operations and Procedures  | Excision of nail                                                  | T | 379101 | 608    | 378493 | 4.56     | 1.51693   | 1.00466  | 0.636     | 32.7      | 0.131069  | 0.89221  |
| Operations and Procedures  | Injection of other substance into organ NOC                       | T | 379101 | 1838   | 377263 | 2.93     | 1.07611   | 0.713389 | 0.725     | 11.9      | 0.131439  | 0.89221  |
| Immuno-inflammation        | Allergy or anaphylactic reaction to food (HES and self-reported)  | T | 379101 | 1833   | 377268 | 2.93     | 1.0757    | 0.713014 | 0.725     | 11.9      | 0.131383  | 0.89221  |
| Medication                 | Iron                                                              | T | 377850 | 11432  | 366418 | 0.226    | -1.48783  | 0.991979 | 0.0323    | 1.58      | 0.13365   | 0.901475 |
| Cardiovascular             | Mitral valve disease (HES and self-reported)                      | T | 379101 | 3385   | 375716 | 2.41     | 0.880128  | 0.586735 | 0.763     | 7.62      | 0.133603  | 0.901475 |
| Operations and Procedures  | Urethral catheterisation of bladder                               | T | 379101 | 10309  | 368792 | 1.79     | 0.584905  | 0.39091  | 0.834     | 3.86      | 0.134585  | 0.905217 |
| Infectious disease         | Other septicaemia (HES)                                           | T | 379101 | 3387   | 375714 | 2.39     | 0.872661  | 0.610408 | 0.76      | 7.54      | 0.135883  | 0.90991  |
| Mental health              | Probable recurrent major depression moderate                      | T | 58838  | 11697  | 47141  | 0.403    | -0.90992  | 0.610408 | 0.122     | 1.33      | 0.136047  | 0.90991  |
| Other                      | Snoring                                                           | T | 352753 | 131409 | 221344 | 1.3      | 0.264232  | 0.178399 | 0.918     | 1.85      | 0.138572  | 0.913961 |
| Operations and Procedures  | Lung removal pneumonectomy lobectomy (self-reported)              | T | 379101 | 614    | 378487 | 4.44     | 1.49109   | 1.00585  | 0.619     | 31.9      | 0.138228  | 0.913961 |
| Operations and Procedures  | Diagnostic endoscopic examination of ileum                        | T | 379101 | 590    | 378511 | 4.45     | 1.49319   | 1.00462  | 0.621     | 31.9      | 0.137194  | 0.913961 |
| Eye                        | Retinal arteryvein occlusion (HES and self-reported)              | T | 379101 | 614    | 378487 | 4.45     | 1.49307   | 1.0063   | 0.619     | 32        | 0.137881  | 0.913961 |
| Cardiovascular             | Pericardial effusion (HES and self-reported)                      | T | 379101 | 600    | 378501 | 4.43     | 1.48919   | 1.00543  | 0.618     | 31.8      | 0.138568  | 0.913961 |
| Operations and Procedures  | Introduction of non removable material into organ NOC             | T | 379101 | 611    | 378490 | 4.44     | 1.4896    | 1.00701  | 0.616     | 31.9      | 0.139077  | 0.914758 |
| Symptoms                   | Hepatomegaly and splenomegaly (HES)                               | T | 379101 | 590    | 378511 | 4.41     | 1.48395   | 1.00563  | 0.614     | 31.7      | 0.140039  | 0.918548 |
| Operations and Procedures  | High cost immunosuppressant drugs                                 | T | 379101 | 602    | 378499 | 4.4      | 1.48072   | 1.00483  | 0.613     | 31.5      | 0.140588  | 0.919615 |
| Genitourinary              | Diseases of Bartholin's gland (HES)                               | T | 379101 | 665    | 378436 | 4.39     | 1.47931   | 1.00932  | 0.607     | 31.7      | 0.142744  | 0.93116  |
| Summary                    | Diabetes mellitus (HES)                                           | T | 379101 | 17982  | 361119 | 0.425    | -0.856221 | 0.585735 | 0.135     | 1.34      | 0.143799  | 0.935479 |
| Haematology                | Anaemia in chronic diseases classified elsewhere (HES)            | T | 379101 | 657    | 378444 | 4.33     | 1.46447   | 1.00553  | 0.603     | 31        | 0.145279  | 0.94134  |
| Musculoskeletal            | Psoriatic and enteropathic arthropathies (HES)                    | T | 379101 | 650    | 378451 | 4.31     | 1.46181   | 1.0046   | 0.602     | 30.9      | 0.145637  | 0.94134  |
| Operations and Procedures  | Excision of organ NOC                                             | T | 379101 | 1832   | 377269 | 2.82     | 1.03636   | 0.712657 | 0.697     | 11.4      | 0.145886  | 0.94134  |
| Infectious disease         | Candidiasis (HES)                                                 | T | 379101 | 1983   | 377118 | 2.8      | 1.0283    | 0.713094 | 0.691     | 11.3      | 0.149295  | 0.956511 |
| ENT                        | Tonsillectomy adenoids (self-reported)                            | T | 379101 | 59321  | 319780 | 0.682    | -0.383031 | 0.265451 | 0.405     | 1.15      | 0.149036  | 0.956511 |
| Operations and Procedures  | Open drainage of bladder                                          | T | 379101 | 606    | 378495 | 4.26     | 1.44876   | 1.00505  | 0.594     | 30.5      | 0.14945   | 0.956511 |
| Digestive system           | Haemochromatosis (HES and self-reported)                          | T | 379101 | 635    | 378466 | 4.26     | 1.44989   | 1.00681  | 0.592     | 30.7      | 0.149844  | 0.956511 |
| Operations and Procedures  | Excision of dental lesion of jaw                                  | T | 379101 | 624    | 378477 | 4.2      | 1.43608   | 1.00454  | 0.587     | 30.1      | 0.152837  | 0.970413 |
| Operations and Procedures  | Excision of sigmoid colon                                         | T | 379101 | 638    | 378463 | 4.22     | 1.43868   | 1.00539  | 0.587     | 30.2      | 0.152437  | 0.970413 |
| Summary                    | Other congenital malformations of the digestive system (HES)      | T | 379101 | 632    | 378469 | 4.19     | 1.43164   | 1.00495  | 0.584     | 30        | 0.154276  | 0.976945 |
| Operations and Procedures  | Suture of organ NOC                                               | T | 379101 | 640    | 378461 | 4.16     | 1.42615   | 1.00454  | 0.581     | 29.8      | 0.155693  | 0.983302 |
| Immuno-inflammation        | Pruritus (HES)                                                    | T | 379101 | 705    | 378396 | 4.16     | 1.42475   | 1.00459  | 0.58      | 29.8      | 0.156121  | 0.983397 |
| Gynaecology and Obstetrics | Mastectomy (self-reported)                                        | T | 379101 | 3844   | 375257 | 2.31     | 0.835868  | 0.591352 | 0.724     | 7.35      | 0.157513  | 0.987445 |
| Musculoskeletal            | Grip strength maximumValue                                        | T | 378322 | NA     | NA     | NA       | -0.117497 | 0.083142 | -0.280455 | 0.045461  | 0.157593  | 0.987445 |
| Summary                    | HESCH Diseases of the eye and adnexa (HES)                        | T | 379101 | 35574  | 343527 | 1.44     | 0.362717  | 0.257085 | 0.868     | 2.38      | 0.158279  | 0.98914  |
| Operations and Procedures  | Other operations on spermatic cord                                | T | 379101 | 598    | 378503 | 4.14     | 1.42065   | 1.00905  | 0.573     | 29.9      | 0.159158  | 0.98952  |
| Operations and Procedures  | Other large intestine                                             | T | 379101 | 3469   | 375632 | 2.28     | 0.822278  | 0.58406  | 0.724     | 7.15      | 0.159171  | 0.98952  |
| Respiratory                | Pleural plaque (HES)                                              | T | 379101 | 645    | 378456 | 4.11     | 1.4135    | 1.01329  | 0.564     | 30        | 0.163026  | 0.995679 |
| Eye                        | Eye surgery (self-reported)                                       | T | 379101 | 3495   | 375606 | 2.26     | 0.815711  | 0.583944 | 0.72      | 7.1       | 0.162444  | 0.995679 |
| Neurosciences              | Stomach abdominal pain for 3 months vs no pain                    | T | 357806 | 17535  | 340271 | 0.443    | -0.814884 | 0.584247 | 0.141     | 1.39      | 0.163089  | 0.995679 |
| Operations and Procedures  | Freeing of tendon                                                 | T | 379101 | 652    | 378449 | 4.08     | 1.40662   | 1.00453  | 0.57      | 29.2      | 0.16143   | 0.995679 |
| Neurosciences              | Back pain                                                         | T | 378231 | 102012 | 276219 | 0.753    | -0.284297 | 0.202874 | 0.506     | 1.12      | 0.16111   | 0.995679 |
| Metabolic                  | Type 2 diabetes (HES and self-reported)                           | T | 379101 | 17351  | 361750 | 0.441    | -0.819551 | 0.58602  | 0.14      | 1.39      | 0.161962  | 0.995679 |
| Gynaecology and Obstetrics | Vaginal prolapseuterine prolapse (HES and self-reported)          | T | 379101 | 11476  | 367625 | 0.243    | -1.41275  | 1.00829  | 0.0337    | 1.76      | 0.161174  | 0.995679 |
| Medication                 | Stomatological preparations                                       | T | 379101 | 59623  | 319478 | 0.914    | -0.089727 | 0.243209 | 0.568     | 1.47      | 0.171282  | 0.998648 |
| Medication                 | Drugs for peptic ulcer and gastro oesophageal reflux disease gord | T | 379101 | 45634  | 333467 | 1.18     | 0.16366   | 0.248861 | 0.723     | 1.92      | 0.1510771 | 0.998648 |
| Medication                 | Drugs for functional gastrointestinal disorders                   | T | 379101 | 3769   | 375332 | 0.752    | -0.284907 | 1.00434  | 0.105     | 5.38      | 0.176658  | 0.998648 |
| Medication                 | Propulsives                                                       | T | 379101 | 1384   | 377717 | 2.06     | 0.72186   | 1.00443  | 0.287     | 14.7      | 0.172339  | 0.998648 |
| Medication                 | Antiemetics and antinauseants                                     | T | 379101 | 234    | 378867 | 0.000121 | -9.01858  | 197.217  | 1.62E-172 | 9.07E+163 | 0.963526  | 0.998648 |
| Medication                 | Bile therapy                                                      | T | 379101 | 233    | 378868 | 0.00012  | -9.02821  | 194.156  | 6.46E-170 | 2.23E+161 | 0.962912  | 0.998648 |
| Medication                 | Drugs for constipation                                            | T | 379101 | 6110   | 372991 | 0.46     | -0.777074 | 1.00437  | 0.0642    | 3.29      | 0.439113  | 0.998648 |
| Medication                 | Intestinal antinfectives                                          | T | 379101 | 693    | 378408 | 0.000103 | -9.18444  | 120.214  | 4.82E-107 | 2.19E+98  | 0.9391    | 0.998648 |
| Medication                 | Antipropulsives                                                   | T | 379101 | 2041   | 377060 | 8.91E-05 | -9.32607  | 73.2745  | 3.78E-67  | 2.10E+58  | 0.988722  | 0.998648 |
| Medication                 | Antibesity preparations excl diet products                        | T | 379101 | 958    | 378143 | 7.51E-05 | -9.49719  | 120.415  | 2.38E-107 | 2.37E+98  | 0.937135  | 0.998648 |
| Medication                 | Digestives incl enzymes                                           | T | 379101 | 255    | 378846 | 9.96E-05 | -9.21478  | 197.598  | 6.30E-173 | 1.57E+164 | 0.962805  | 0.998648 |
| Medication                 | Multivitamins combinations                                        | T | 379101 | 19000  | 360101 | 1.03     | 0.028753  | 0.388049 | 0.481     | 2.2       | 0.940935  | 0.998648 |
| Medication                 | Vitamin a and d incl combinations of the two                      | T | 379101 | 10919  | 368182 | 0.522    | -0.650789 | 0.715904 | 0.128     | 2.12      | 0.363327  | 0.998648 |
| Medication                 | Vitamin b1 plain and in combination with vitamin b6 and b12       | T | 379101 | 3169   | 375932 | 6.20E-05 | -9.68835  | 73.1822  | 3.15E-67  | 1.22E+58  | 0.894678  | 0.998648 |
| Medication                 | Ascorbic acid vitamin c incl combinations                         | T | 379101 | 6192   | 372909 | 1.81     | 0.592913  | 0.507561 | 0.669     | 4.89      | 0.242742  | 0.998648 |
| Medication                 | Other plain vitamin preparations                                  | T | 379101 | 4840   | 374261 | 4.11E-05 | -10.0997  | 72.8733  | 3.83E-67  | 4.41E+57  | 0.889772  | 0.998648 |
| Medication                 | Other mineral supplements                                         | T | 379101 | 878    | 378223 | 8.93E-05 | -9.32369  | 117.648  | 6.41E-105 | 1.24E+96  | 0.936833  | 0.998648 |
| Medication                 | Antithrombotic agents                                             | T | 379101 | 59142  | 319959 | 0.812    | -0.208092 | 0.255159 | 0.493     | 1.34      | 0.414764  | 0.998648 |
| Medication                 | Antifibrinolytics                                                 | T | 379101 | 502    | 378599 | 8.14E-05 | -9.41629  | 176.66   | 3.42E-155 | 1.93E+146 | 0.957491  | 0.998648 |
| Medication                 | Iron preparations                                                 | T | 379101 | 19982  | 359119 | 0.824    | -0.193824 | 0.417581 | 0.363     | 1.87      | 0.642534  | 0.998648 |
| Medication                 | Vitamin b12 and folic acid                                        | T | 379101 | 8262   | 370839 | 0.343    | -1.06999  | 1.00387  | 0.048     | 2.45      | 0.286485  | 0.998648 |
| Medication                 | Irrigating solutions                                              | T | 379101 | 1449   | 377652 | 5.24E-05 | -9.85731  | 118.734  | 4.47E-106 | 6.13E+96  | 0.933836  | 0.998648 |
| Medication                 | I v solution additives                                            | T | 379101 | 936    | 378165 | 8.36E-05 | -9.38894  | 117.979  | 3.14E-105 | 2.23E+96  | 0.93657   | 0.998648 |
| Medication                 | Cardiac glycosides                                                | T | 379101 | 1042   | 378059 | 2.56     | 0.941801  | 1.00876  | 0.355     | 18.5      | 0.350498  | 0.998648 |
| Medication                 | Antiarrhythmics class i and iii                                   | T | 379101 | 1297   | 377804 | 2.05     | 0.717523  | 1.00513  | 0.286     | 14.7      | 0.475315  | 0.998648 |
| Medication                 | Cardiac stimulants excl cardiac glycosides                        | T | 379101 | 304    | 378797 | 8.27E-05 | -9.40081  | 196.614  | 3.60E-172 | 1.90E+163 | 0.961865  | 0.998648 |
| Medication                 | Vasodilators used in cardiac diseases                             | T | 379101 | 5385   | 373716 | 3.75E-05 | -10.1915  | 69.8383  | 1.34E-64  | 1.05E+55  | 0.883977  | 0.998648 |
| Medication                 | Other cardiac preparations                                        | T | 379101 | 50254  | 328847 | 0.812    | -0.208005 | 0.266936 | 0.481     | 1.37      | 0.435844  | 0.998648 |
| Medication                 | Adiadrenergic agents centrally acting                             | T | 379101 | 1115   | 377986 | 6.65E-05 | -9.61791  | 119.382  | 1.60E-106 | 2.77E+97  | 0.935788  | 0.998648 |
| Medication                 | Adiadrenergic agents peripherally acting                          | T | 379101 | 4727   | 374374 | 1.69     | 0.522233  | 0.588188 | 0.532     | 5.34      | 0.374612  | 0.998648 |
| Medication                 | Antihypertensives and diuretics in combination                    | T | 379101 | 1142   | 377959 | 6.48E-05 | -9.64448  | 119.41   | 1.47E-106 | 2.85E+97  | 0.935627  | 0.998648 |
| Medication                 | Low ceiling diuretics thiazides                                   | T | 379101 | 23557  | 355544 | 1.04     | 0.041959  | 0.349333 | 0.526     | 2.07      | 0.904395  | 0.998648 |
| Medication                 | Low ceiling diuretics excl thiazides                              | T | 379101 | 1449   | 377652 | 1.83     | 0.602175  | 1.00549  | 0.254     | 13.1      | 0.549247  | 0.998648 |
| Medication                 | High ceiling diuretics                                            | T | 379101 | 3930   | 375171 | 2.19     | 0.784943  | 0.582729 | 0.693     | 6.93      | 0.181361  | 0.998648 |
| Medication                 | Potassium sparing agents                                          | T | 379101 | 950    | 378151 | 7.25E-05 | -9.53198  | 118.63   | 7.59E-106 | 6.92E+96  | 0.935959  | 0.998648 |
| Medication                 | Diuretics and potassium sparing agents in combination             | T | 379101 | 27954  | 351147 | 1.2      | 0.181227  | 0.307636 | 0.656     | 2.19      | 0.555798  | 0.998648 |
| Medication                 | Peripheral vasodilators                                           | T | 379101 | 334    | 378767 | 8.08E-05 | -9.42343  | 197.871  | 2.99E-173 | 2.18E+164 | 0.962016  | 0.998648 |
| Medication                 | Hemorrhoids and anal fissures for topical use                     | T | 379101 | 11708  | 367393 | 0.681    | -0.383599 | 0.58506  | 0.216     | 2.14      | 0.512045  | 0.998648 |
| Medication                 | Beta blocking agents                                              | T | 379101 | 27196  | 351905 | 0.986    | -0.01435  | 0.332678 | 0.514     | 1.89      | 0.965595  | 0.998648 |
| Medication                 | Beta blocking agents and thiazides                                | T | 379101 | 27196  | 3519   |          |           |          |           |           |           |          |

|            |                                                                       |   |        |       |        |          |           |          |           |           |          |          |
|------------|-----------------------------------------------------------------------|---|--------|-------|--------|----------|-----------|----------|-----------|-----------|----------|----------|
| Medication | Estrogens                                                             | T | 379101 | 10090 | 369011 | 0.85     | -0.162924 | 0.590095 | 0.267     | 2.7       | 0.782473 | 0.998648 |
| Medication | Progestogens                                                          | T | 379101 | 2010  | 377091 | 1.64     | 0.4943    | 1.01399  | 0.225     | 12        | 0.625918 | 0.998648 |
| Medication | Androgens and female sex hormones in combination                      | T | 379101 | 421   | 378680 | 5.85E-05 | -9.74627  | 194.714  | 1.06E-170 | 3.24E+161 | 0.960079 | 0.998648 |
| Medication | Progestogens and estrogens in combination                             | T | 379101 | 8666  | 370435 | 0.326    | -1.11978  | 1.00927  | 0.0451    | 2.36      | 0.267215 | 0.998648 |
| Medication | Other sex hormones and modulators of the genital system               | T | 379101 | 368   | 378733 | 9.92E-05 | -9.21842  | 177.305  | 1.18E-155 | 8.35E+146 | 0.958535 | 0.998648 |
| Medication | Urologicals                                                           | T | 379101 | 6031  | 373070 | 3.00E-05 | -10.4132  | 72.4913  | 5.91E-67  | 1.53E+57  | 0.885779 | 0.998648 |
| Medication | Drugs used in benign prostatic hypertrophy                            | T | 379101 | 6797  | 372304 | 0.359    | -1.02343  | 1.00917  | 0.0497    | 2.6       | 0.310522 | 0.998648 |
| Medication | Corticosteroids for systemic use plain                                | T | 379101 | 6943  | 372158 | 1.16     | 0.147556  | 0.584069 | 0.369     | 3.64      | 0.800551 | 0.998648 |
| Medication | Thyroid preparations                                                  | T | 379101 | 21493 | 357608 | 0.915    | -0.089022 | 0.392721 | 0.424     | 1.98      | 0.820673 | 0.998648 |
| Medication | Antithyroid preparations                                              | T | 379101 | 334   | 378767 | 7.78E-05 | -9.46088  | 196.772  | 2.49E-172 | 2.44E+163 | 0.961652 | 0.998648 |
| Summary    | Intestinal infectious diseases (HES)                                  | T | 379101 | 8022  | 371079 | 1.37     | 0.318309  | 0.507756 | 0.508     | 3.72      | 0.53073  | 0.998648 |
| Summary    | Other bacterial diseases (HES)                                        | T | 379101 | 4393  | 374708 | 1.84     | 0.611209  | 0.585039 | 0.585     | 5.8       | 0.296147 | 0.998648 |
| Summary    | Infections sexual mode of transmission (HES)                          | T | 379101 | 253   | 378848 | 0.00011  | -9.11253  | 197.003  | 2.24E-172 | 5.43E+163 | 0.963106 | 0.998648 |
| Summary    | Viral infections of the central nervous system (HES)                  | T | 379101 | 233   | 378868 | 9.99E-05 | -9.21125  | 199.143  | 3.06E-174 | 3.26E+165 | 0.963108 | 0.998648 |
| Summary    | Viral infections skin and mucous memb (HES)                           | T | 379101 | 1422  | 377679 | 1.91     | 0.645779  | 1.00406  | 0.267     | 13.6      | 0.520115 | 0.998648 |
| Summary    | Viral hepatitis (HES)                                                 | T | 379101 | 525   | 378576 | 4.81E-05 | -9.94293  | 197.057  | 8.78E-173 | 2.63E+163 | 0.959758 | 0.998648 |
| Summary    | Other viral diseases (HES)                                            | T | 379101 | 1781  | 377320 | 1.53     | 0.426758  | 1.00391  | 0.214     | 11        | 0.670766 | 0.998648 |
| Summary    | Mycoses (HES)                                                         | T | 379101 | 2468  | 376633 | 2.22     | 0.798837  | 0.712946 | 0.55      | 8.99      | 0.262512 | 0.998648 |
| Summary    | Nutritional anaemias (HES)                                            | T | 379101 | 7757  | 371344 | 1.8      | 0.585498  | 0.456011 | 0.735     | 4.39      | 0.199158 | 0.998648 |
| Summary    | Haemolytic anaemias (HES)                                             | T | 379101 | 276   | 378825 | 9.25E-05 | -9.28837  | 197.535  | 6.62E-173 | 1.29E+164 | 0.962496 | 0.998648 |
| Summary    | Aplastic and other anaemias (HES)                                     | T | 379101 | 11319 | 367782 | 1.22     | 0.198057  | 0.45613  | 0.499     | 2.98      | 0.664134 | 0.998648 |
| Summary    | Coagulation defects purpura and other haemorrhagic conditions (HES)   | T | 379101 | 2426  | 376675 | 7.50E-05 | -9.49785  | 73.2987  | 3.03E-67  | 1.85E+58  | 0.896901 | 0.998648 |
| Summary    | Certain disorders involving the immune mechanism (HES)                | T | 379101 | 976   | 378125 | 6.70E-05 | -9.61048  | 120.765  | 1.07E-107 | 4.20E+98  | 0.936571 | 0.998648 |
| Summary    | Disorders of thyroid gland (HES)                                      | T | 379101 | 15440 | 363661 | 0.905    | -0.099705 | 0.459064 | 0.368     | 2.23      | 0.828059 | 0.998648 |
| Summary    | Glucose regulation and pancreatic internal secretion (HES)            | T | 379101 | 831   | 378270 | 8.33E-05 | -9.39351  | 119.694  | 1.08E-106 | 6.40E+97  | 0.937447 | 0.998648 |
| Summary    | Disorders of other endocrine glands (HES)                             | T | 379101 | 2354  | 376747 | 1.15     | 0.140199  | 1.00392  | 0.161     | 8.23      | 0.888935 | 0.998648 |
| Summary    | Other nutritional deficiencies (HES)                                  | T | 379101 | 1249  | 377852 | 5.56E-05 | -9.79699  | 120.802  | 8.25E-108 | 3.75E+98  | 0.935363 | 0.998648 |
| Summary    | Obesity and other hyperalimentation (HES)                             | T | 379101 | 9921  | 369180 | 1.1      | 0.094774  | 0.507518 | 0.407     | 2.97      | 0.851864 | 0.998648 |
| Summary    | Organic including symptomatic mental disorders (HES)                  | T | 379101 | 1447  | 377654 | 5.05E-05 | -9.89428  | 115.32   | 3.47E-103 | 7.33E+93  | 0.931627 | 0.998648 |
| Summary    | Mental disorders due to psychoactive sub (HES)                        | T | 379101 | 14024 | 365077 | 1.58     | 0.460355  | 0.366183 | 0.773     | 3.25      | 0.208691 | 0.998648 |
| Summary    | Schizophrenia schizotypal and delusional disorders (HES)              | T | 379101 | 899   | 378202 | 7.56E-05 | -9.48943  | 120.336  | 2.80E-107 | 2.05E+98  | 0.937146 | 0.998648 |
| Summary    | Mood affective disorders (HES)                                        | T | 379101 | 11549 | 367552 | 0.701    | -0.354542 | 0.583751 | 0.223     | 2.2       | 0.543617 | 0.998648 |
| Summary    | Neurotic stress related and somatoform disorders (HES)                | T | 379101 | 6748  | 372353 | 0.4      | -0.91529  | 1.00357  | 0.056     | 2.86      | 0.361752 | 0.998648 |
| Summary    | Behav syn assoc with phys disturb and phys fact (HES)                 | T | 379101 | 424   | 378677 | 5.92E-05 | -9.73418  | 197.241  | 7.54E-173 | 4.65E+163 | 0.960639 | 0.998648 |
| Summary    | Disorders of adult personality and behaviour (HES)                    | T | 379101 | 350   | 378751 | 7.12E-05 | -9.54961  | 196.777  | 2.28E-172 | 2.22E+163 | 0.961292 | 0.998648 |
| Summary    | Disorders of psychological development (HES)                          | T | 379101 | 287   | 378814 | 8.05E-05 | -9.4269   | 198.566  | 7.64E-174 | 8.49E+164 | 0.962135 | 0.998648 |
| Summary    | Inflammatory diseases of the central nervous system (HES)             | T | 379101 | 536   | 378565 | 4.52E-05 | -10.0052  | 199.594  | 5.71E-175 | 3.57E+165 | 0.96002  | 0.998648 |
| Summary    | Atrophies affecting central nervous system (HES)                      | T | 379101 | 368   | 378733 | 6.69E-05 | -9.61265  | 197.447  | 5.69E-173 | 7.86E+163 | 0.961171 | 0.998648 |
| Summary    | Other degenerative diseases of the nervous system (HES)               | T | 379101 | 907   | 378194 | 2.99     | 1.0953    | 1.00654  | 0.416     | 21.5      | 0.276516 | 0.998648 |
| Summary    | Demyelinating diseases of the central nervous system (HES)            | T | 379101 | 1406  | 377695 | 1.95     | 0.669318  | 1.00443  | 0.273     | 14        | 0.505178 | 0.998648 |
| Summary    | Episodic and paroxysmal disorders (HES)                               | T | 379101 | 12991 | 366110 | 1.02     | 0.019298  | 0.455708 | 0.417     | 2.49      | 0.966222 | 0.998648 |
| Summary    | Polynuropathies and peripheral nervous system (HES)                   | T | 379101 | 1669  | 377432 | 3.99E-05 | -10.1294  | 119.826  | 4.01E-107 | 3.97E+97  | 0.932632 | 0.998648 |
| Summary    | Diseases of myoneural junction and muscle (HES)                       | T | 379101 | 482   | 378619 | 5.07E-05 | -9.88982  | 199.215  | 1.35E-174 | 1.91E+165 | 0.960406 | 0.998648 |
| Summary    | Cerebral palsy and other paralytic syndromes (HES)                    | T | 379101 | 2036  | 377065 | 2.63     | 0.967368  | 0.713073 | 0.65      | 10.6      | 0.174902 | 0.998648 |
| Summary    | Other disorders of the nervous system (HES)                           | T | 379101 | 3742  | 375359 | 4.77E-05 | -9.95088  | 73.4486  | 1.44E-67  | 1.58E+58  | 0.892232 | 0.998648 |
| Summary    | Disorders of eyelid lacrimal system and orbit (HES)                   | T | 379101 | 8748  | 370353 | 0.938    | -0.063566 | 0.584387 | 0.299     | 2.95      | 0.913382 | 0.998648 |
| Summary    | Disorders of conjunctiva (HES)                                        | T | 379101 | 908   | 378193 | 7.52E-05 | -9.49577  | 120.518  | 1.95E-107 | 2.90E+98  | 0.937198 | 0.998648 |
| Summary    | Disorders of lens (HES)                                               | T | 379101 | 18482 | 360619 | 1.37     | 0.316731  | 0.352973 | 0.687     | 2.74      | 0.369546 | 0.998648 |
| Summary    | Disorders of choroid and retina (HES)                                 | T | 379101 | 6755  | 372346 | 1.15     | 0.14139   | 0.585728 | 0.365     | 3.63      | 0.809252 | 0.998648 |
| Summary    | Glaucoma (HES)                                                        | T | 379101 | 4048  | 375053 | 1.32     | 0.276403  | 0.714777 | 0.325     | 5.35      | 0.69898  | 0.998648 |
| Summary    | Disorders of vitreous body and globe (HES)                            | T | 379101 | 1565  | 377536 | 1.6      | 0.467832  | 1.00507  | 0.223     | 11.4      | 0.641593 | 0.998648 |
| Summary    | Ocular musculoskeletal movement (HES)                                 | T | 379101 | 2672  | 376429 | 0.969    | -0.031748 | 1.00412  | 0.135     | 6.93      | 0.974777 | 0.998648 |
| Summary    | Visual disturbances and blindness (HES)                               | T | 379101 | 3428  | 375673 | 0.777    | -0.25266  | 1.00368  | 0.109     | 5.55      | 0.801248 | 0.998648 |
| Summary    | Other disorders of eye and adnexa (HES)                               | T | 379101 | 876   | 378225 | 7.66E-05 | -9.47685  | 120.579  | 1.76E-107 | 3.34E+98  | 0.937355 | 0.998648 |
| Summary    | Diseases of external ear (HES)                                        | T | 379101 | 1324  | 377777 | 4.96E-05 | -9.91224  | 120.745  | 8.22E-108 | 2.99E+98  | 0.934573 | 0.998648 |
| Summary    | Diseases of middle ear and mastoid (HES)                              | T | 379101 | 2903  | 376198 | 0.934    | -0.067886 | 1.00366  | 0.131     | 6.68      | 0.946074 | 0.998648 |
| Summary    | Diseases of inner ear (HES)                                           | T | 379101 | 1848  | 377253 | 3.69E-05 | -10.2077  | 120.734  | 6.25E-108 | 2.18E+98  | 0.932621 | 0.998648 |
| Summary    | Other disorders of ear (HES)                                          | T | 379101 | 4112  | 374989 | 0.642    | -0.442865 | 1.00396  | 0.0898    | 4.59      | 0.659127 | 0.998648 |
| Summary    | Chronic rheumatic heart diseases (HES)                                | T | 379101 | 1969  | 377132 | 3.66E-05 | -10.2165  | 117.166  | 6.75E-105 | 1.98E+95  | 0.930515 | 0.998648 |
| Summary    | Hypertensive diseases (HES)                                           | T | 379101 | 70604 | 308497 | 0.922    | -0.08116  | 0.227978 | 0.59      | 1.44      | 0.721841 | 0.998648 |
| Summary    | Ischaemic heart diseases (HES)                                        | T | 379101 | 27652 | 351449 | 0.643    | -0.442215 | 0.39494  | 0.296     | 1.39      | 0.262841 | 0.998648 |
| Summary    | Pulmonary heart disease and diseases of pulmonary circulation (HES)   | T | 379101 | 3992  | 375109 | 2        | 0.693109  | 0.585203 | 0.635     | 6.3       | 0.236259 | 0.998648 |
| Summary    | Other forms of heart disease (HES)                                    | T | 379101 | 26042 | 353059 | 1.24     | 0.21531   | 0.30828  | 0.678     | 2.27      | 0.484912 | 0.998648 |
| Summary    | Diseases of veins lymphatic vessels (HES)                             | T | 379101 | 35400 | 343701 | 1.16     | 0.144423  | 0.273377 | 0.676     | 1.97      | 0.597296 | 0.998648 |
| Summary    | Other and unspecified disorders of the circulatory system (HES)       | T | 379101 | 4939  | 374162 | 1.64     | 0.494876  | 0.585308 | 0.521     | 5.17      | 0.397834 | 0.998648 |
| Summary    | Acute upper respiratory infections (HES)                              | T | 379101 | 2654  | 376447 | 6.94E-05 | -9.57562  | 73.4857  | 1.95E-67  | 2.48E+58  | 0.896324 | 0.998648 |
| Summary    | Other diseases of upper respiratory tract (HES)                       | T | 379101 | 13139 | 365962 | 1.44     | 0.367489  | 0.388204 | 0.675     | 3.09      | 0.343822 | 0.998648 |
| Summary    | Lung diseases due to external agents (HES)                            | T | 379101 | 898   | 378203 | 2.97     | 1.08955   | 1.00702  | 0.413     | 21.4      | 0.729271 | 0.998648 |
| Summary    | Respiratory diseases interstitium (HES)                               | T | 379101 | 1501  | 377600 | 1.81     | 0.593767  | 1.00568  | 0.252     | 13        | 0.554914 | 0.998648 |
| Summary    | Diseases of oral cavity salivary glands and jaws (HES)                | T | 379101 | 14224 | 364877 | 0.561    | -0.578788 | 0.583604 | 0.179     | 1.76      | 0.32132  | 0.998648 |
| Summary    | Diseases of oesophagus stomach and duodenum (HES)                     | T | 379101 | 55390 | 323711 | 1.1      | 0.098072  | 0.233605 | 0.698     | 1.74      | 0.674616 | 0.998648 |
| Summary    | Diseases of appendix (HES)                                            | T | 379101 | 3245  | 375856 | 1.61     | 0.473679  | 0.712504 | 0.397     | 6.49      | 0.506173 | 0.998648 |
| Summary    | Hernia (HES)                                                          | T | 379101 | 42709 | 336392 | 0.772    | -0.25931  | 0.294257 | 0.433     | 1.37      | 0.378191 | 0.998648 |
| Summary    | Noninfective enteritis and colitis (HES)                              | T | 379101 | 17546 | 361555 | 0.764    | -0.269145 | 0.455589 | 0.313     | 1.87      | 0.554679 | 0.998648 |
| Summary    | Other diseases of intestines (HES)                                    | T | 379101 | 59649 | 319452 | 0.739    | -0.301971 | 0.260069 | 0.444     | 1.23      | 0.245594 | 0.998648 |
| Summary    | Diseases of peritoneum (HES)                                          | T | 379101 | 3415  | 375686 | 1.61     | 0.475456  | 0.712552 | 0.398     | 6.5       | 0.504607 | 0.998648 |
| Summary    | Other diseases of the digestive system (HES)                          | T | 379101 | 11473 | 367628 | 1.17     | 0.154746  | 0.455791 | 0.478     | 2.85      | 0.734225 | 0.998648 |
| Summary    | Infections of the skin and subcutaneous tissue (HES)                  | T | 379101 | 9696  | 369405 | 1.37     | 0.314332  | 0.456004 | 0.56      | 3.35      | 0.490623 | 0.998648 |
| Summary    | Dermatitis and eczema (HES)                                           | T | 379101 | 2862  | 376239 | 1.94     | 0.660405  | 0.712521 | 0.479     | 7.82      | 0.354001 | 0.998648 |
| Summary    | Papulosquamous disorders (HES)                                        | T | 379101 | 2604  | 376497 | 1.05     | 0.048407  | 1.00391  | 0.147     | 7.51      | 0.961542 | 0.998648 |
| Summary    | Urticaria and erythema (HES)                                          | T | 379101 | 948   | 378153 | 7.16E-05 | -9.54463  | 120.976  | 7.55E-108 | 6.79E+98  | 0.937115 | 0.998648 |
| Summary    | Radiation related disorders of the skin and subcutaneous tissue (HES) | T | 379101 | 2288  | 376813 | 8.22E-05 | -9.40647  | 71.3925  | 1.39E-65  | 4.85E+56  | 0.895176 | 0.998648 |
| Summary    | Disorders of skin appendages (HES)                                    | T | 379101 | 9390  | 369711 | 0.869    | -0.140353 | 0.583669 | 0.277     | 2.73      | 0.809969 | 0.998648 |
| Summary    | Other disorders of the skin and subcutaneous tissue (HES)             | T | 379101 | 14568 | 364533 | 1.12     | 0.10986   | 0.417867 | 0.492     | 2.53      | 0.792623 | 0.998648 |
| Summary    | Infectious arthropathies (HES)                                        | T | 379101 | 428   | 378673 | 5.50E-05 | -9.8081   | 198.105  | 1.29E-173 | 2.35E+164 | 0.960513 | 0.998648 |
| Summary    | Inflammatory polyarthropathies (HES)                                  | T | 379101 | 17341 | 361760 | 0.957</  |           |          |           |           |          |          |

|                    |                                                                          |   |        |        |        |          |           |          |           |           |          |          |
|--------------------|--------------------------------------------------------------------------|---|--------|--------|--------|----------|-----------|----------|-----------|-----------|----------|----------|
| Summary            | Congenital malformations of eye ear face and neck (HES)                  | T | 379101 | 307    | 378794 | 7.79E-05 | -9.46057  | 198.918  | 3.71E-174 | 1.64E+165 | 0.962067 | 0.998648 |
| Summary            | Congenital malformations of genital organs (HES)                         | T | 379101 | 628    | 378473 | 0.00011  | -9.11309  | 120.445  | 3.29E-107 | 3.69E+98  | 0.939688 | 0.998648 |
| Summary            | Congenital malformations of the urinary system (HES)                     | T | 379101 | 821    | 378280 | 7.89E-05 | -9.44687  | 120.804  | 1.17E-107 | 5.34E+98  | 0.937669 | 0.998648 |
| Summary            | Congenital malformations musculoskeletal system (HES)                    | T | 379101 | 711    | 378390 | 3.73     | 1.3165    | 1.00481  | 0.521     | 26.7      | 0.190128 | 0.998648 |
| Summary            | Other congenital malformations (HES)                                     | T | 379101 | 615    | 378486 | 0.000108 | -9.13309  | 120.961  | 1.17E-107 | 9.95E+98  | 0.939814 | 0.998648 |
| Summary            | Symptoms circulatory and respiratory systems (HES)                       | T | 379101 | 45652  | 333449 | 1.07     | 0.070645  | 0.253542 | 0.653     | 1.76      | 0.780528 | 0.998648 |
| Summary            | Symptoms and signs involving the digestive system and abdomen (HES)      | T | 379101 | 52090  | 327011 | 0.767    | -0.26512  | 0.273615 | 0.449     | 1.31      | 0.332569 | 0.998648 |
| Summary            | Symptoms and signs involving the urinary system (HES)                    | T | 379101 | 26525  | 352576 | 1.09     | 0.082935  | 0.316711 | 0.584     | 2.02      | 0.793426 | 0.998648 |
| Summary            | Symptoms cognition perception emotional state (HES)                      | T | 379101 | 8138   | 370963 | 1.35     | 0.299731  | 0.508322 | 0.498     | 3.65      | 0.555427 | 0.998648 |
| Summary            | Symptoms and signs involving speech and voice (HES)                      | T | 379101 | 2293   | 376808 | 2.37     | 0.860792  | 0.71316  | 0.584     | 9.57      | 0.227428 | 0.998648 |
| Summary            | General symptoms and signs (HES)                                         | T | 379101 | 41556  | 337545 | 1.11     | 0.107817  | 0.258863 | 0.671     | 1.85      | 0.677043 | 0.998648 |
| Summary            | Abnormal findings on examination of blood without diagnosis (HES)        | T | 379101 | 7295   | 371806 | 1.45     | 0.369622  | 0.511881 | 0.531     | 3.95      | 0.470242 | 0.998648 |
| Summary            | Abnormal findings of urine without diagnosis (HES)                       | T | 379101 | 652    | 378449 | 0.000106 | -9.15415  | 120.62   | 2.24E-107 | 4.99E+98  | 0.939505 | 0.998648 |
| Summary            | Abn exm of fluids subst wo diag (HES)                                    | T | 379101 | 1857   | 377244 | 4.03E-05 | -10.1196  | 118.4    | 6.62E-106 | 2.45E+96  | 0.931888 | 0.998648 |
| Summary            | Abnormal findings on diagnostic imaging (HES)                            | T | 379101 | 8914   | 370187 | 0.924    | -0.078864 | 0.584628 | 0.294     | 2.91      | 0.892694 | 0.998648 |
| Summary            | HESCH Chapter IX Diseases of the circulatory system BIN (HES)            | T | 379101 | 117038 | 262063 | 0.93     | -0.072119 | 0.190176 | 0.641     | 1.35      | 0.704521 | 0.998648 |
| Summary            | HESCH Diseases of the ear and mastoid process (HES)                      | T | 379101 | 8809   | 370292 | 0.602    | -0.506841 | 0.712051 | 0.149     | 2.43      | 0.476585 | 0.998648 |
| Summary            | HESCH Diseases of the nervous system (HES)                               | T | 379101 | 36198  | 342903 | 0.871    | -0.138663 | 0.301985 | 0.482     | 1.57      | 0.64611  | 0.998648 |
| Summary            | HESCH Mental and behavioural disorders (HES)                             | T | 379101 | 29106  | 349995 | 1.02     | 0.024552  | 0.314288 | 0.554     | 1.9       | 0.937733 | 0.998648 |
| Summary            | HESCH Diseases of the musculo and connec tissue (HES)                    | T | 379101 | 100763 | 278338 | 1.26     | 0.231302  | 0.183241 | 0.88      | 1.8       | 0.206846 | 0.998648 |
| Summary            | HESCH Diseases of the skin and subcutaneous tissue (HES)                 | T | 379101 | 37154  | 341947 | 1.1      | 0.09225   | 0.273504 | 0.642     | 1.87      | 0.735898 | 0.998648 |
| Summary            | HESCH Diseases of the genitourinary system (HES)                         | T | 379101 | 91318  | 287783 | 0.945    | -0.056343 | 0.202953 | 0.635     | 1.41      | 0.781306 | 0.998648 |
| Summary            | HESCH Diseases of the digestive system (HES)                             | T | 379101 | 137916 | 241185 | 1.08     | 0.074747  | 0.174499 | 0.765     | 1.52      | 0.668395 | 0.998648 |
| Summary            | HESCH Pregnancy childbirth and the puerperium (HES)                      | T | 379101 | 12811  | 366290 | 0.583    | -0.540169 | 0.75443  | 0.133     | 2.56      | 0.473994 | 0.998648 |
| Infectious disease | Other bacterial intestinal infections (HES)                              | T | 379101 | 2315   | 376786 | 8.33E-05 | -9.39326  | 72.829   | 8.46E-67  | 8.20E+57  | 0.897376 | 0.998648 |
| Infectious disease | Viral and other specified intestinal infections (HES)                    | T | 379101 | 770    | 378331 | 9.02E-05 | -9.31316  | 120.69   | 1.67E-107 | 4.88E+98  | 0.938491 | 0.998648 |
| Infectious disease | Streptococcal septicaemia (HES)                                          | T | 379101 | 235    | 378866 | 0.000104 | -9.17306  | 196.103  | 1.23E-171 | 8.76E+162 | 0.962691 | 0.998648 |
| Infectious disease | Bacterial infection of unspecified site (HES)                            | T | 379101 | 696    | 378405 | 3.9      | 1.36126   | 1.00506  | 0.544     | 28        | 0.175608 | 0.998648 |
| Infectious disease | Herpesviral (HES)                                                        | T | 379101 | 232    | 378869 | 0.000109 | -9.12555  | 198.698  | 7.97E-174 | 1.49E+165 | 0.963369 | 0.998648 |
| Infectious disease | Viral warts (HES)                                                        | T | 379101 | 643    | 378458 | 0.000105 | -9.16035  | 121.121  | 8.35E-108 | 1.32E+99  | 0.939714 | 0.998648 |
| Infectious disease | Chronic viral hepatitis (HES)                                            | T | 379101 | 343    | 378758 | 7.65E-05 | -9.47852  | 195.154  | 5.82E-171 | 1.00E+162 | 0.961263 | 0.998648 |
| Infectious disease | Viral infection of unspecified site (HES)                                | T | 379101 | 1590   | 377511 | 1.73     | 0.545373  | 1.00397  | 0.241     | 12.3      | 0.586982 | 0.998648 |
| Infectious disease | Dermatophytosis (HES)                                                    | T | 379101 | 227    | 378874 | 0.000109 | -9.12585  | 195.35   | 5.64E-171 | 2.10E+162 | 0.96274  | 0.998648 |
| Infectious disease | Streptococcus and staphylococcus (HES)                                   | T | 379101 | 3735   | 375366 | 0.69     | -0.370845 | 1.00383  | 0.0965    | 4.94      | 0.711807 | 0.998648 |
| Infectious disease | Viral agents as the cause of diseases classified to other chapters (HES) | T | 379101 | 505    | 378596 | 5.45E-05 | -9.81642  | 194.803  | 8.26E-171 | 3.60E+161 | 0.95981  | 0.998648 |
| Infectious disease | Helicobacter pylori (HES)                                                | T | 379101 | 748    | 378353 | 0.000101 | -9.20198  | 119.157  | 3.76E-106 | 2.70E+97  | 0.938444 | 0.998648 |
| Haematology        | Vitamin B12 deficiency anaemia (HES)                                     | T | 379101 | 809    | 378292 | 9.19E-05 | -9.29465  | 119.45   | 1.93E-106 | 4.38E+97  | 0.937978 | 0.998648 |
| Haematology        | Other aplastic anaemias (HES)                                            | T | 379101 | 409    | 378692 | 6.32E-05 | -9.66951  | 195.995  | 9.25E-172 | 4.31E+162 | 0.960652 | 0.998648 |
| Haematology        | Other anaemias (HES)                                                     | T | 379101 | 10478  | 368623 | 1.05     | 0.046771  | 0.507939 | 0.387     | 2.84      | 0.926635 | 0.998648 |
| Haematology        | Other coagulation defects (HES)                                          | T | 379101 | 874    | 378227 | 7.64E-05 | -9.47969  | 121.137  | 5.88E-108 | 9.93E+98  | 0.937624 | 0.998648 |
| Haematology        | Purpura and other haemorrhagic conditions (HES)                          | T | 379101 | 1530   | 377571 | 4.42E-05 | -10.0257  | 120.326  | 1.67E-107 | 1.17E+98  | 0.933596 | 0.998648 |
| Haematology        | Agranulocytosis (HES)                                                    | T | 379101 | 2906   | 376195 | 6.39E-05 | -9.6585   | 73.0767  | 3.99E-67  | 1.02E+58  | 0.89485  | 0.998648 |
| Haematology        | Other disorders of white blood cells (HES)                               | T | 379101 | 309    | 378792 | 8.27E-05 | -9.40052  | 197.512  | 6.19E-173 | 1.10E+164 | 0.962039 | 0.998648 |
| Immunology         | Sarcoidosis (HES)                                                        | T | 379101 | 489    | 378612 | 4.91E-05 | -9.92227  | 199.601  | 6.12E-175 | 3.93E+165 | 0.960353 | 0.998648 |
| Immunology         | Other disorders involving the immune mechanism (HES)                     | T | 379101 | 290    | 378811 | 8.84E-05 | -9.33325  | 195.357  | 4.52E-171 | 1.73E+162 | 0.961895 | 0.998648 |
| Metabolic          | Other hypothyroidism (HES)                                               | T | 379101 | 12869  | 366232 | 0.425    | -0.856415 | 0.714756 | 0.105     | 1.72      | 0.230843 | 0.998648 |
| Metabolic          | Thyrotoxicosis (HES)                                                     | T | 379101 | 1663   | 377438 | 1.7      | 0.52781   | 1.00497  | 0.236     | 12.2      | 0.599443 | 0.998648 |
| Metabolic          | Thyroiditis (HES)                                                        | T | 379101 | 275    | 378826 | 0.000105 | -9.16501  | 191.43   | 1.18E-167 | 9.29E+158 | 0.961815 | 0.998648 |
| Metabolic          | Other disorders of thyroid (HES)                                         | T | 379101 | 357    | 378744 | 7.58E-05 | -9.48765  | 195.033  | 7.31E-171 | 7.85E+161 | 0.961201 | 0.998648 |
| Metabolic          | Insulin dependent diabetes mellitus (HES)                                | T | 379101 | 2572   | 376529 | 1.01     | 0.012314  | 1.00411  | 0.141     | 7.25      | 0.990216 | 0.998648 |
| Metabolic          | Non insulin dependent diabetes mellitus (HES)                            | T | 379101 | 16601  | 362500 | 0.462    | -0.771861 | 0.586078 | 0.147     | 1.46      | 0.187841 | 0.998648 |
| Metabolic          | Unspecified diabetes mellitus (HES)                                      | T | 379101 | 2120   | 376981 | 1.29     | 0.253916  | 1.00534  | 0.18      | 9.25      | 0.800604 | 0.998648 |
| Metabolic          | Other disorders of pancreatic internal secretion (HES)                   | T | 379101 | 829    | 378272 | 8.35E-05 | -9.39126  | 119.701  | 1.07E-106 | 6.50E+97  | 0.937466 | 0.998648 |
| Metabolic          | Hyperparathyroidism of parathyroid gland (HES)                           | T | 379101 | 752    | 378349 | 3.68     | 1.30232   | 1.00568  | 0.512     | 26.4      | 0.195335 | 0.998648 |
| Metabolic          | Hyperfunction of pituitary gland (HES)                                   | T | 379101 | 291    | 378810 | 8.58E-05 | -9.36329  | 198.996  | 3.51E-174 | 2.10E+165 | 0.962471 | 0.998648 |
| Metabolic          | Hypofunction and other disorders of pituitary gland (HES)                | T | 379101 | 359    | 378742 | 6.88E-05 | -9.5838   | 198.213  | 1.30E-173 | 3.63E+164 | 0.961437 | 0.998648 |
| Metabolic          | Other disorders of adrenal gland (HES)                                   | T | 379101 | 431    | 378670 | 5.83E-05 | -9.75059  | 199.029  | 2.23E-174 | 1.52E+165 | 0.960927 | 0.998648 |
| Metabolic          | Ovarian dysfunction (HES)                                                | T | 379101 | 239    | 378862 | 5.87E-08 | -16.6504  | 9398.25  | 0         | inf       | 0.998586 | 0.998648 |
| Metabolic          | Deficiency of other B group vitamins (HES)                               | T | 379101 | 664    | 378437 | 0.000108 | -9.13663  | 120.542  | 2.66E-107 | 4.36E+98  | 0.939581 | 0.998648 |
| Metabolic          | Vitamin D deficiency (HES)                                               | T | 379101 | 359    | 378742 | 7.42E-05 | -9.50887  | 198.186  | 1.48E-173 | 3.71E+164 | 0.961733 | 0.998648 |
| Metabolic          | Deficiency of other nutrient elements (HES)                              | T | 379101 | 216    | 378885 | 0.000108 | -9.13344  | 198.418  | 1.37E-173 | 8.52E+164 | 0.963285 | 0.998648 |
| Metabolic          | Obesity (HES)                                                            | T | 379101 | 9864   | 369237 | 1.11     | 0.100141  | 0.507522 | 0.409     | 2.99      | 0.843582 | 0.998648 |
| Metabolic          | Disorders of porphyrin and bilirubin metabolism (HES)                    | T | 379101 | 367    | 378734 | 6.66E-05 | -9.61673  | 196.748  | 2.23E-172 | 1.99E+163 | 0.961016 | 0.998648 |
| Metabolic          | Disorders of mineral metabolism (HES)                                    | T | 379101 | 1975   | 377126 | 1.38     | 0.324204  | 1.0047   | 0.193     | 9.91      | 0.746933 | 0.998648 |
| Metabolic          | Volume depletion (HES)                                                   | T | 379101 | 2592   | 376509 | 2.13     | 0.75676   | 0.713645 | 0.526     | 8.63      | 0.288955 | 0.998648 |
| Metabolic          | Other disorders of fluid electrolyte and acid base balance (HES)         | T | 379101 | 4789   | 374312 | 1.72     | 0.543922  | 0.585776 | 0.547     | 5.43      | 0.353122 | 0.998648 |
| Metabolic          | Postprocedural endocrine and metabolic disorders (HES)                   | T | 379101 | 1206   | 377895 | 2.3      | 0.834428  | 1.00548  | 0.321     | 16.5      | 0.406608 | 0.998648 |
| Mental health      | Dementia in Alzheimer s disease (HES)                                    | T | 379101 | 223    | 378878 | 5.03E-05 | -9.89816  | 302.275  | 2.51E-262 | 1.01E+253 | 0.973877 | 0.998648 |
| Mental health      | Unspecified dementia (HES)                                               | T | 379101 | 432    | 378669 | 6.75E-05 | -9.60267  | 184.899  | 2.76E-162 | 1.66E+153 | 0.958581 | 0.998648 |
| Mental health      | Delirium not induced by alcohol and other psychoactive substances (HES)  | T | 379101 | 538    | 378563 | 5.08E-05 | -9.88789  | 188.995  | 6.76E-166 | 3.82E+156 | 0.958275 | 0.998648 |
| Mental health      | Other mental disorders due to brain damage (HES)                         | T | 379101 | 212    | 378889 | 0.000119 | -9.03281  | 195.125  | 9.62E-171 | 1.48E+162 | 0.963077 | 0.998648 |
| Mental health      | Mental and behavioural disorders due to use of tobacco (HES)             | T | 379101 | 10134  | 368967 | 0.802    | -0.22039  | 0.584502 | 0.255     | 2.52      | 0.706132 | 0.998648 |
| Mental health      | Schizophrenia (HES)                                                      | T | 379101 | 496    | 378605 | 5.04E-05 | -9.89507  | 197.294  | 5.79E-173 | 4.39E+163 | 0.96     | 0.998648 |
| Mental health      | Bipolar affective disorder (HES)                                         | T | 379101 | 888    | 378213 | 7.55E-05 | -9.4914   | 121.079  | 6.51E-108 | 8.76E+98  | 0.937518 | 0.998648 |
| Mental health      | Depressive episode (HES)                                                 | T | 379101 | 10665  | 368436 | 0.763    | -0.270875 | 0.583772 | 0.243     | 2.39      | 0.642641 | 0.998648 |
| Mental health      | Recurrent depressive disorder (HES)                                      | T | 379101 | 679    | 378422 | 9.97E-05 | -9.21352  | 121.015  | 9.74E-108 | 1.02E+99  | 0.939312 | 0.998648 |
| Mental health      | Phobic anxiety disorders (HES)                                           | T | 379101 | 527    | 378574 | 4.88E-05 | -9.92798  | 198.559  | 4.69E-174 | 5.07E+164 | 0.960122 | 0.998648 |
| Mental health      | Other anxiety disorders (HES)                                            | T | 379101 | 5413   | 373688 | 0.504    | -0.685279 | 1.00361  | 0.0705    | 3.6       | 0.494726 | 0.998648 |
| Mental health      | Reaction to severe stress and adjustment disorders (HES)                 | T | 379101 | 481    | 378620 | 5.18E-05 | -9.86797  | 197.286  | 6.04E-173 | 4.44E+163 | 0.960108 | 0.998648 |
| Mental health      | Somatiform disorders (HES)                                               | T | 379101 | 381    | 378720 | 6.56E-05 | -9.63247  | 199.301  | 1.47E-174 | 2.92E+165 | 0.961452 | 0.998648 |
| Mental health      | Sexual dysfunction not caused disorder or disease (HES)                  | T | 379101 | 264    | 378837 | 0.000106 | -9.1506   | 185.43   | 1.53E-162 | 7.36E+153 | 0.960642 | 0.998648 |
| Mental health      | Specific personality disorders (HES)                                     | T | 379101 | 293    | 378808 | 8.61E-05 | -9.36048  | 195.904  | 1.51E-171 | 4.92E+162 | 0.961891 | 0.998648 |
| Neurosciences      | Spinal muscular atrophy and related syndromes (HES)                      | T | 379101 | 213    | 378888 | 0.000116 | -9.05856  | 195.603  | 3.68E-171 | 3.69E+162 | 0.963062 | 0.998648 |
| Neurosciences      | Dystonia (HES)                                                           | T | 379101 | 231    | 378870 | 0.000112 | -9.09526  | 198.656  | 8.92E-174 | 1.4       |          |          |

|                  |                                                                   |   |        |       |        |          |           |           |           |           |          |          |
|------------------|-------------------------------------------------------------------|---|--------|-------|--------|----------|-----------|-----------|-----------|-----------|----------|----------|
| Eye              | Disorders of orbit (HES)                                          | T | 379101 | 250   | 378851 | 9.87E-05 | -9.22348  | 199.46    | 1.62E-174 | 6.00E+165 | 0.963117 | 0.998648 |
| Eye              | Conjunctivitis (HES)                                              | T | 379101 | 221   | 378880 | 0.000116 | -9.0599   | 198.225   | 2.15E-173 | 6.28E+164 | 0.963545 | 0.998648 |
| Eye              | Other disorders of conjunctiva (HES)                              | T | 379101 | 672   | 378429 | 0.000101 | -9.19945  | 120.482   | 2.81E-107 | 3.64E+98  | 0.939136 | 0.998648 |
| Eye              | Keratitis (HES)                                                   | T | 379101 | 236   | 378865 | 0.000103 | -9.18234  | 199.145   | 3.14E-174 | 3.37E+165 | 0.963223 | 0.998648 |
| Eye              | Disorders of iris and ciliary body (HES)                          | T | 379101 | 272   | 378829 | 8.61E-05 | -9.36047  | 197.285   | 1.01E-172 | 7.37E+163 | 0.962158 | 0.998648 |
| Eye              | Senile cataract (HES)                                             | T | 379101 | 7529  | 371572 | 1.47     | 0.387418  | 0.513961  | 0.538     | 4.03      | 0.450976 | 0.998648 |
| Eye              | Other cataract (HES)                                              | T | 379101 | 13094 | 366007 | 1.27     | 0.239654  | 0.423606  | 0.554     | 2.92      | 0.571566 | 0.998648 |
| Eye              | Other disorders of lens (HES)                                     | T | 379101 | 203   | 378898 | 0.000118 | -9.04761  | 197.657   | 6.63E-173 | 2.09E+164 | 0.96349  | 0.998648 |
| Eye              | Retinal detachments and breaks (HES)                              | T | 379101 | 2997  | 376104 | 0.821    | -0.197786 | 1.00462   | 0.115     | 5.88      | 0.843925 | 0.998648 |
| Eye              | Other retinal disorders (HES)                                     | T | 379101 | 3106  | 375995 | 1.74     | 0.553908  | 0.715095  | 0.428     | 7.07      | 0.438579 | 0.998648 |
| Eye              | Retinal disorders in diseases classified elsewhere (HES)          | T | 379101 | 1229  | 377872 | 5.47E-05 | -9.81361  | 118.642   | 5.60E-106 | 5.35E+96  | 0.934077 | 0.998648 |
| Eye              | Glaucoma (HES)                                                    | T | 379101 | 4047  | 375054 | 1.32     | 0.276751  | 0.714777  | 0.325     | 5.35      | 0.698619 | 0.998648 |
| Eye              | Disorders of vitreous body (HES)                                  | T | 379101 | 1246  | 377855 | 2.03     | 0.709123  | 1.00524   | 0.283     | 14.6      | 0.480546 | 0.998648 |
| Eye              | Disorders of globe (HES)                                          | T | 379101 | 389   | 378712 | 5.79E-05 | -9.7576   | 196.481   | 3.27E-172 | 1.02E+163 | 0.960392 | 0.998648 |
| Eye              | Other disorders of optic (HES)                                    | T | 379101 | 285   | 378816 | 8.43E-05 | -9.38099  | 197.893   | 2.99E-173 | 2.38E+164 | 0.962191 | 0.998648 |
| Eye              | Paralytic strabismus (HES)                                        | T | 379101 | 258   | 378843 | 9.18E-05 | -9.2964   | 198.58    | 8.47E-174 | 9.94E+164 | 0.962661 | 0.998648 |
| Eye              | Other strabismus (HES)                                            | T | 379101 | 823   | 378278 | 8.16E-05 | -9.4142   | 121.081   | 7.00E-108 | 9.50E+98  | 0.938026 | 0.998648 |
| Eye              | Disorders of refraction and accommodation (HES)                   | T | 379101 | 1639  | 377462 | 1.56     | 0.446886  | 1.00489   | 0.218     | 11.2      | 0.656527 | 0.998648 |
| Eye              | Visual disturbances (HES)                                         | T | 379101 | 2695  | 376406 | 6.72E-05 | -9.60795  | 73.3706   | 2.36E-67  | 1.91E+58  | 0.895814 | 0.998648 |
| Eye              | Blindness and low vision (HES)                                    | T | 379101 | 805   | 378296 | 3.34     | 1.20596   | 1.00467   | 0.466     | 23.9      | 0.230005 | 0.998648 |
| Eye              | Other disorders of eye and adnexa (HES)                           | T | 379101 | 430   | 378671 | 5.93E-05 | -9.7332   | 199.203   | 1.61E-174 | 2.18E+165 | 0.96103  | 0.998648 |
| ENT              | Otitis externa (HES)                                              | T | 379101 | 488   | 378613 | 5.04E-05 | -9.89489  | 199.397   | 9.39E-175 | 2.71E+165 | 0.960422 | 0.998648 |
| ENT              | Other disorders of external ear (HES)                             | T | 379101 | 883   | 378218 | 7.35E-05 | -9.51802  | 120.327   | 2.77E-107 | 1.95E+98  | 0.936952 | 0.998648 |
| ENT              | Nonsuppurative otitis media (HES)                                 | T | 379101 | 959   | 378142 | 2.77     | 1.01845   | 1.00432   | 0.387     | 19.8      | 0.310552 | 0.998648 |
| ENT              | Suppurative and unspecified otitis media (HES)                    | T | 379101 | 700   | 378401 | 9.91E-05 | -9.2196   | 120.776   | 1.55E-107 | 6.35E+98  | 0.939152 | 0.998648 |
| ENT              | Cholesteatoma of middle ear (HES)                                 | T | 379101 | 393   | 378708 | 6.22E-05 | -9.68453  | 199.242   | 1.57E-174 | 2.47E+165 | 0.961233 | 0.998648 |
| ENT              | Perforation of tympanic membrane (HES)                            | T | 379101 | 870   | 378231 | 7.91E-05 | -9.445    | 120.935   | 9.04E-108 | 6.92E+98  | 0.937749 | 0.998648 |
| ENT              | Other disorders of tympanic membrane (HES)                        | T | 379101 | 333   | 378768 | 7.34E-05 | -9.51901  | 199.383   | 1.41E-174 | 3.84E+165 | 0.961922 | 0.998648 |
| ENT              | Other disorders of middle ear and mastoid (HES)                   | T | 379101 | 400   | 378701 | 6.26E-05 | -9.67887  | 199.298   | 1.41E-174 | 2.77E+165 | 0.961266 | 0.998648 |
| ENT              | Otosclerosis (HES)                                                | T | 379101 | 275   | 378826 | 8.65E-05 | -9.35548  | 199.283   | 2.01E-174 | 3.72E+165 | 0.962556 | 0.998648 |
| ENT              | Disorders of vestibular function (HES)                            | T | 379101 | 871   | 378230 | 8.10E-05 | -9.42128  | 120.121   | 4.56E-107 | 1.44E+98  | 0.937485 | 0.998648 |
| ENT              | Other diseases of inner ear (HES)                                 | T | 379101 | 734   | 378367 | 9.29E-05 | -9.28422  | 120.813   | 1.35E-107 | 6.40E+98  | 0.938745 | 0.998648 |
| ENT              | Conductive and sensorineural hearing loss (HES)                   | T | 379101 | 866   | 378235 | 7.70E-05 | -9.4714   | 120.816   | 1.11E-107 | 5.34E+98  | 0.937514 | 0.998648 |
| ENT              | Other hearing loss (HES)                                          | T | 379101 | 2563  | 376538 | 1.02     | 0.02443   | 1.00469   | 0.143     | 7.34      | 0.980601 | 0.998648 |
| ENT              | Otalgia and effusion of ear (HES)                                 | T | 379101 | 479   | 378622 | 5.25E-05 | -9.85486  | 199.157   | 1.56E-174 | 1.76E+165 | 0.960534 | 0.998648 |
| ENT              | Other disorders of ear (HES)                                      | T | 379101 | 566   | 378535 | 4.44E-05 | -10.0232  | 198.834   | 2.49E-174 | 7.90E+164 | 0.959796 | 0.998648 |
| Cardiovascular   | Rheumatic mitral valve diseases (HES)                             | T | 379101 | 286   | 378815 | 9.87E-05 | -9.22372  | 192.592   | 1.14E-168 | 8.55E+159 | 0.961802 | 0.998648 |
| Cardiovascular   | Rheumatic tricuspid valve diseases (HES)                          | T | 379101 | 262   | 378839 | 9.96E-05 | -9.21442  | 195.011   | 1.00E-170 | 9.88E+161 | 0.962313 | 0.998648 |
| Cardiovascular   | Multiple valve diseases (HES)                                     | T | 379101 | 1492  | 377609 | 4.83E-05 | -9.93741  | 116.909   | 1.48E-104 | 1.58E+95  | 0.932226 | 0.998648 |
| Cardiovascular   | Essential primary hypertension (HES)                              | T | 379101 | 70382 | 308719 | 0.926    | -0.076894 | 0.227978  | 0.592     | 1.45      | 0.735902 | 0.998648 |
| Cardiovascular   | Hypertensive renal disease (HES)                                  | T | 379101 | 1396  | 377705 | 4.99E-05 | -9.90512  | 117.597   | 3.96E-105 | 6.29E+95  | 0.932874 | 0.998648 |
| Cardiovascular   | Acute myocardial infarction (HES)                                 | T | 379101 | 7305  | 371796 | 0.348    | -1.05449  | 1.00602   | 0.0485    | 2.5       | 0.294559 | 0.998648 |
| Cardiovascular   | Subsequent myocardial infarction (HES)                            | T | 379101 | 663   | 378438 | 4.03E-05 | -10.1188  | 187.227   | 1.72E-164 | 9.47E+154 | 0.956899 | 0.998648 |
| Cardiovascular   | Other acute ischaemic heart diseases (HES)                        | T | 379101 | 1278  | 377823 | 5.55E-05 | -9.79983  | 116.337   | 5.20E-104 | 5.92E+94  | 0.932869 | 0.998648 |
| Cardiovascular   | Chronic ischaemic heart disease (HES)                             | T | 379101 | 22951 | 356150 | 0.543    | -0.610109 | 0.462592  | 0.219     | 1.35      | 0.187205 | 0.998648 |
| Cardiovascular   | Pulmonary embolism (HES)                                          | T | 379101 | 3296  | 375805 | 1.6      | 0.471255  | 0.713334  | 0.396     | 6.48      | 0.508845 | 0.998648 |
| Cardiovascular   | Other pulmonary heart diseases (HES)                              | T | 379101 | 745   | 378356 | 3.59     | 1.27775   | 1.00631   | 0.499     | 25.8      | 0.204178 | 0.998648 |
| Cardiovascular   | Other diseases of pericardium (HES)                               | T | 379101 | 973   | 378128 | 2.69     | 0.9886    | 1.00513   | 0.375     | 19.3      | 0.325333 | 0.998648 |
| Cardiovascular   | Nonrheumatic aortic valve disorders (HES)                         | T | 379101 | 2314  | 376787 | 1.14     | 0.12939   | 1.00642   | 0.158     | 8.18      | 0.897702 | 0.998648 |
| Cardiovascular   | Cardiomyopathy (HES)                                              | T | 379101 | 1163  | 377938 | 5.62E-05 | -9.78609  | 118.97    | 3.02E-106 | 1.05E+97  | 0.934443 | 0.998648 |
| Cardiovascular   | Atrioventricular and left bundle branch block (HES)               | T | 379101 | 3286  | 375815 | 0.79     | -0.236193 | 1.00611   | 0.11      | 5.67      | 0.814397 | 0.998648 |
| Cardiovascular   | Other conduction disorders (HES)                                  | T | 379101 | 1981  | 377120 | 2.62     | 0.962985  | 0.715097  | 0.645     | 10.6      | 0.178093 | 0.998648 |
| Cardiovascular   | Cardiac arrest (HES)                                              | T | 379101 | 863   | 378238 | 3.07     | 1.12288   | 1.00642   | 0.428     | 22.1      | 0.264543 | 0.998648 |
| Cardiovascular   | Paroxysmal tachycardia (HES)                                      | T | 379101 | 2977  | 376124 | 1.79     | 0.580289  | 0.713112  | 0.442     | 7.23      | 0.415793 | 0.998648 |
| Cardiovascular   | Atrial fibrillation and flutter (HES)                             | T | 379101 | 13484 | 365617 | 1.61     | 0.47339   | 0.372336  | 0.774     | 3.33      | 0.203585 | 0.998648 |
| Cardiovascular   | Other cardiac arrhythmias (HES)                                   | T | 379101 | 2381  | 376720 | 7.84E-05 | -9.45305  | 72.2306   | 2.57E-66  | 2.39E+57  | 0.895876 | 0.998648 |
| Cardiovascular   | Heart failure (HES)                                               | T | 379101 | 4854  | 374247 | 3.99E-05 | -10.1296  | 69.9549   | 1.13E-64  | 1.40E+55  | 0.884868 | 0.998648 |
| Cardiovascular   | Complications and ill defined descriptions of heart disease (HES) | T | 379101 | 3773  | 375328 | 1.41     | 0.346807  | 0.715589  | 0.348     | 5.75      | 0.627928 | 0.998648 |
| Cardiovascular   | Intracerebral haemorrhage (HES)                                   | T | 379101 | 660   | 378441 | 0.000104 | -9.17099  | 118.276   | 2.18E-105 | 4.96E+96  | 0.938195 | 0.998648 |
| Cardiovascular   | Other nontraumatic intracranial haemorrhage (HES)                 | T | 379101 | 336   | 378765 | 7.44E-05 | -9.50572  | 193.041   | 3.56E-169 | 1.55E+160 | 0.960726 | 0.998648 |
| Cardiovascular   | Cerebral infarction (HES)                                         | T | 379101 | 2917  | 376184 | 1.85     | 0.61645   | 0.715023  | 0.456     | 7.52      | 0.38861  | 0.998648 |
| Cardiovascular   | Stroke not specified as haemorrhage or infarction (HES)           | T | 379101 | 968   | 378133 | 7.30E-05 | -9.52544  | 117.354   | 9.32E-105 | 5.71E+95  | 0.935308 | 0.998648 |
| Cardiovascular   | Occlusion and stenosis not cerebral infarction (HES)              | T | 379101 | 928   | 378173 | 8.00E-05 | -9.43314  | 115.013   | 1.01E-102 | 6.37E+93  | 0.934632 | 0.998648 |
| Cardiovascular   | Sequelae of cerebrovascular disease (HES)                         | T | 379101 | 1161  | 377940 | 2.3      | 0.831502  | 1.00533   | 0.32      | 16.5      | 0.408185 | 0.998648 |
| Cardiovascular   | Atherosclerosis (HES)                                             | T | 379101 | 1127  | 377974 | 6.43E-05 | -9.65269  | 115.032   | 7.77E-103 | 5.31E+93  | 0.933125 | 0.998648 |
| Cardiovascular   | Arterial embolism and thrombosis (HES)                            | T | 379101 | 839   | 378262 | 8.70E-05 | -9.3491   | 116.593   | 4.94E-104 | 1.53E+95  | 0.936089 | 0.998648 |
| Cardiovascular   | Other disorders of arteries and arterioles (HES)                  | T | 379101 | 1296  | 377805 | 5.61E-05 | -9.78899  | 116.8     | 2.12E-104 | 1.48E+95  | 0.933207 | 0.998648 |
| Cardiovascular   | Diseases of capillaries (HES)                                     | T | 379101 | 604   | 378497 | 0.000116 | -9.05851  | 120.19    | 5.73E-107 | 2.36E+98  | 0.939921 | 0.998648 |
| Cardiovascular   | Phlebitis and thrombophlebitis (HES)                              | T | 379101 | 3502  | 375599 | 1.5      | 0.408723  | 0.713315  | 0.372     | 6.09      | 0.566553 | 0.998648 |
| Cardiovascular   | Other venous embolism and thrombosis (HES)                        | T | 379101 | 367   | 378734 | 6.64E-05 | -9.6198   | 199.511   | 9.89E-175 | 4.46E+165 | 0.961543 | 0.998648 |
| Cardiovascular   | Varicose veins of lower extremities (HES)                         | T | 379101 | 9985  | 369116 | 1.12     | 0.116379  | 0.507881  | 0.415     | 3.04      | 0.818756 | 0.998648 |
| Cardiovascular   | Haemorrhoids (HES)                                                | T | 379101 | 21509 | 357592 | 1.25     | 0.226939  | 0.328484  | 0.659     | 2.39      | 0.489384 | 0.998648 |
| Digestive system | Oesophageal varices (HES)                                         | T | 379101 | 488   | 378613 | 5.18E-05 | -9.86818  | 195.946   | 8.35E-172 | 3.21E+166 | 0.959834 | 0.998648 |
| Cardiovascular   | Varicose veins of other sites (HES)                               | T | 379101 | 460   | 378641 | 5.64E-05 | -9.78321  | 193.824   | 5.82E-170 | 5.46E+160 | 0.959744 | 0.998648 |
| Cardiovascular   | Other lymphatic vessels and lymph nodes (HES)                     | T | 379101 | 601   | 378500 | 0.00011  | -9.11425  | 120.872   | 1.42E-107 | 8.51E+98  | 0.939893 | 0.998648 |
| Cardiovascular   | Hypotension (HES)                                                 | T | 379101 | 4415  | 374686 | 1.85     | 0.612906  | 0.585389  | 0.586     | 5.81      | 0.295097 | 0.998648 |
| Cardiovascular   | Disorders of circulatory system in disease (HES)                  | T | 379101 | 256   | 378845 | 9.88E-05 | -9.22199  | 193.677   | 1.36E-169 | 7.18E+160 | 0.962023 | 0.998648 |
| ENT              | Acute nasopharyngitis (HES)                                       | T | 379101 | 356   | 378745 | 6.95E-05 | -9.57406  | 199.128   | 2.19E-174 | 2.20E+165 | 0.961652 | 0.998648 |
| ENT              | Acute pharyngitis (HES)                                           | T | 379101 | 757   | 378344 | 8.98E-05 | -9.31841  | 121.151   | 6.72E-108 | 1.20E+99  | 0.938691 | 0.998648 |
| ENT              | Acute tonsillitis (HES)                                           | T | 379101 | 512   | 378589 | 5.45E-05 | -9.81782  | 193.663   | 7.71E-170 | 3.85E+160 | 0.959568 | 0.998648 |
| Respiratory      | Acute upper respiratory infections (HES)                          | T | 379101 | 729   | 378372 | 9.37E-05 | -9.27525  | 121.053   | 8.50E-108 | 1.03E+99  | 0.938925 | 0.998648 |
| Respiratory      | Pneumonia due to Streptococcus pneumoniae (HES)                   | T | 379101 | 234   | 378867 | 0.000109 | -9.12683  | 197.84    | 4.28E-173 | 2.76E+164 | 0.963205 | 0.998648 |
| Respiratory      | Bacterial pneumonia (HES)                                         | T | 379101 | 433   | 378668 | 5.82E-05 | -9.75184  | 196.558   | 2.83E-172 | 1.20E+163 | 0.960431 | 0.998648 |
| Respiratory      | Vasomotor and allergic rhinitis (HES)                             | T | 379101 | 952   | 378149 | 2.79     | 1.02776   | 1.00424</ |           |           |          |          |

|                     |                                                                     |   |        |       |        |          |           |          |           |           |          |          |
|---------------------|---------------------------------------------------------------------|---|--------|-------|--------|----------|-----------|----------|-----------|-----------|----------|----------|
| Digestive system    | Duodenal ulcer (HES)                                                | T | 379101 | 2818  | 376283 | 1.92     | 0.654745  | 0.714426 | 0.474     | 7.81      | 0.359425 | 0.998648 |
| Digestive system    | Gastritis and duodenitis (HES)                                      | T | 379101 | 26187 | 352914 | 1.07     | 0.064288  | 0.329561 | 0.559     | 2.03      | 0.845337 | 0.998648 |
| Digestive system    | Dyspepsia (HES)                                                     | T | 379101 | 10739 | 368362 | 1.03     | 0.030031  | 0.507889 | 0.381     | 2.79      | 0.952849 | 0.998648 |
| Digestive system    | Other diseases of stomach and duodenum (HES)                        | T | 379101 | 6601  | 372500 | 1.27     | 0.239654  | 0.58462  | 0.404     | 4         | 0.681857 | 0.998648 |
| Digestive system    | Acute appendicitis (HES)                                            | T | 379101 | 2629  | 376472 | 0.986    | -0.014198 | 1.00385  | 0.138     | 7.05      | 0.988715 | 0.998648 |
| Digestive system    | Other diseases of appendix (HES)                                    | T | 379101 | 242   | 378859 | 1.00E-04 | -9.20969  | 199.186  | 2.82E-174 | 3.55E+165 | 0.963122 | 0.998648 |
| Digestive system    | Inguinal hernia (HES)                                               | T | 379101 | 14392 | 364709 | 1.21     | 0.18674   | 0.398329 | 0.552     | 2.63      | 0.639207 | 0.998648 |
| Digestive system    | Femoral hernia (HES)                                                | T | 379101 | 558   | 378543 | 4.79E-05 | -9.94704  | 196.59   | 2.18E-172 | 1.05E+163 | 0.959646 | 0.998648 |
| Digestive system    | Umbilical hernia (HES)                                              | T | 379101 | 3437  | 375664 | 0.721    | -0.326648 | 1.00477  | 0.101     | 5.17      | 0.745108 | 0.998648 |
| Digestive system    | Ventral hernia (HES)                                                | T | 379101 | 3093  | 376008 | 5.86E-05 | -9.7448   | 73.2314  | 2.70E-67  | 1.27E+58  | 0.894139 | 0.998648 |
| Digestive system    | Diaphragmatic hernia (HES)                                          | T | 379101 | 24453 | 354648 | 0.658    | -0.418091 | 0.418612 | 0.29      | 1.5       | 0.317913 | 0.998648 |
| Digestive system    | Unspecified abdominal hernia (HES)                                  | T | 379101 | 276   | 378825 | 8.96E-05 | -9.31964  | 196.604  | 3.98E-172 | 2.02E+163 | 0.962192 | 0.998648 |
| Digestive system    | Crohn s disease (HES)                                               | T | 379101 | 1547  | 377554 | 4.31E-05 | -10.0528  | 121.213  | 2.85E-108 | 6.50E+98  | 0.933903 | 0.998648 |
| Digestive system    | Ulcerative colitis (HES)                                            | T | 379101 | 2940  | 376161 | 6.09E-05 | -9.70647  | 73.3589  | 2.19E-67  | 1.69E+58  | 0.894735 | 0.998648 |
| Digestive system    | Other noninfective gastroenteritis and colitis (HES)                | T | 379101 | 14793 | 364308 | 0.92     | -0.083645 | 0.455709 | 0.377     | 2.25      | 0.854368 | 0.998648 |
| Digestive system    | Vascular disorders of intestine (HES)                               | T | 379101 | 936   | 378165 | 7.47E-05 | -9.50222  | 118.86   | 4.98E-106 | 1.12E+97  | 0.936281 | 0.998648 |
| Digestive system    | Paralytic ileus and intestinal obstruction without hernia (HES)     | T | 379101 | 3590  | 375511 | 0.762    | -0.271332 | 1.0042   | 0.107     | 5.46      | 0.787008 | 0.998648 |
| Digestive system    | Diverticular disease of intestine (HES)                             | T | 379101 | 24930 | 354171 | 1.11     | 0.103303  | 0.331781 | 0.579     | 2.12      | 0.755528 | 0.998648 |
| Digestive system    | Irritable bowel syndrome (HES)                                      | T | 379101 | 5022  | 374079 | 1.13     | 0.119489  | 0.713248 | 0.278     | 4.56      | 0.866955 | 0.998648 |
| Digestive system    | Other functional intestinal disorders (HES)                         | T | 379101 | 10172 | 368929 | 0.54     | -0.616945 | 0.712208 | 0.134     | 2.18      | 0.386357 | 0.998648 |
| Digestive system    | Fissure and fistula of anal and rectal regions (HES)                | T | 379101 | 2863  | 376238 | 0.91     | -0.094473 | 1.00401  | 0.127     | 6.51      | 0.925033 | 0.998648 |
| Digestive system    | Abscess of anal and rectal regions (HES)                            | T | 379101 | 1208  | 377893 | 5.57E-05 | -9.79516  | 119.396  | 1.30E-106 | 2.39E+97  | 0.934615 | 0.998648 |
| Digestive system    | Other diseases of intestine (HES)                                   | T | 379101 | 13086 | 366015 | 0.816    | -0.202868 | 0.508795 | 0.301     | 2.21      | 0.690907 | 0.998648 |
| Digestive system    | Peritonitis (HES)                                                   | T | 379101 | 722   | 378379 | 3.77     | 1.32644   | 1.00477  | 0.526     | 27        | 0.186788 | 0.998648 |
| Digestive system    | Other disorders of peritoneum (HES)                                 | T | 379101 | 2824  | 376277 | 1.96     | 0.671119  | 0.712703 | 0.484     | 7.91      | 0.346371 | 0.998648 |
| Digestive system    | Alcoholic liver disease (HES)                                       | T | 379101 | 799   | 378302 | 3.36     | 1.21056   | 1.0077   | 0.466     | 24.2      | 0.229632 | 0.998648 |
| Digestive system    | Hepatic failure (HES)                                               | T | 379101 | 298   | 378803 | 8.56E-05 | -9.36573  | 196.459  | 5.05E-172 | 1.45E+163 | 0.951977 | 0.998648 |
| Digestive system    | Other inflammatory liver diseases (HES)                             | T | 379101 | 623   | 378478 | 0.000112 | -9.09595  | 120.386  | 3.76E-107 | 3.34E+98  | 0.939772 | 0.998648 |
| Digestive system    | Cholecystitis (HES)                                                 | T | 379101 | 2442  | 376659 | 7.73E-05 | -9.46812  | 73.0198  | 5.40E-67  | 1.11E+58  | 0.896831 | 0.998648 |
| Digestive system    | Other diseases of biliary tract (HES)                               | T | 379101 | 1752  | 377349 | 3.95E-05 | -10.139   | 119.958  | 3.06E-107 | 5.09E+97  | 0.932642 | 0.998648 |
| Digestive system    | Intestinal malabsorption (HES)                                      | T | 379101 | 1888  | 377213 | 3.51E-05 | -10.2575  | 120.633  | 7.25E-108 | 1.70E+98  | 0.935237 | 0.998648 |
| Digestive system    | Postprocedural disorders of digestive system (HES)                  | T | 379101 | 1429  | 377672 | 1.85     | 0.614188  | 1.0043   | 0.258     | 13.2      | 0.540831 | 0.998648 |
| Digestive system    | Other diseases of digestive system (HES)                            | T | 379101 | 8428  | 370673 | 1.28     | 0.246447  | 0.507798 | 0.473     | 3.46      | 0.627446 | 0.998648 |
| Immuno-inflammation | Cutaneous abscess furuncle and carbuncle (HES)                      | T | 379101 | 2145  | 376956 | 1.25     | 0.220728  | 1.00396  | 0.174     | 8.92      | 0.825983 | 0.998648 |
| Immuno-inflammation | Cellulitis (HES)                                                    | T | 379101 | 6570  | 372531 | 1.61     | 0.477069  | 0.508198 | 0.595     | 4.36      | 0.347861 | 0.998648 |
| Immuno-inflammation | Pilonidal cyst (HES)                                                | T | 379101 | 452   | 378649 | 5.75E-05 | -9.7643   | 192.941  | 3.35E-169 | 9.87E+159 | 0.959638 | 0.998648 |
| Immuno-inflammation | Other local infections of skin and subcutaneous tissue (HES)        | T | 379101 | 1106  | 377995 | 6.10E-05 | -9.70391  | 120.457  | 1.78E-107 | 2.09E+98  | 0.935793 | 0.998648 |
| Immuno-inflammation | Dermatitis due to substances taken internally (HES)                 | T | 379101 | 436   | 378665 | 5.84E-05 | -9.74799  | 198.916  | 2.79E-174 | 1.22E+165 | 0.960915 | 0.998648 |
| Immuno-inflammation | Other dermatitis (HES)                                              | T | 379101 | 1379  | 377722 | 4.91E-05 | -9.92178  | 120.983  | 5.11E-108 | 4.72E+98  | 0.934639 | 0.998648 |
| Immuno-inflammation | Psoriasis (HES)                                                     | T | 379101 | 2058  | 377043 | 1.31     | 0.266626  | 1.00406  | 0.182     | 9.34      | 0.790587 | 0.998648 |
| Immuno-inflammation | Lichen planus (HES)                                                 | T | 379101 | 501   | 378600 | 5.64E-05 | -9.78273  | 196.969  | 1.22E-172 | 2.60E+163 | 0.960388 | 0.998648 |
| Immuno-inflammation | Urticaria (HES)                                                     | T | 379101 | 328   | 378773 | 7.69E-05 | -9.47304  | 199.396  | 1.43E-174 | 4.12E+165 | 0.962108 | 0.998648 |
| Immuno-inflammation | Other erythematous conditions (HES)                                 | T | 379101 | 481   | 378620 | 5.28E-05 | -9.84945  | 198.611  | 4.59E-174 | 6.07E+164 | 0.960448 | 0.998648 |
| Immuno-inflammation | Skin changes due to chronic exposure to nonionizing radiation (HES) | T | 379101 | 2179  | 376922 | 8.62E-05 | -9.35905  | 171.344  | 1.61E-65  | 4.61E+56  | 0.895631 | 0.998648 |
| Immuno-inflammation | Rosacea (HES)                                                       | T | 379101 | 277   | 378824 | 9.31E-05 | -9.282    | 197.559  | 6.36E-173 | 1.36E+164 | 0.962527 | 0.998648 |
| Immuno-inflammation | Follicular cysts of skin and subcutaneous tissue (HES)              | T | 379101 | 7583  | 371518 | 0.354    | -1.03957  | 1.00351  | 0.0495    | 2.53      | 0.300233 | 0.998648 |
| Immuno-inflammation | Other follicular disorders (HES)                                    | T | 379101 | 373   | 378728 | 7.25E-05 | -9.53256  | 198.233  | 1.32E-173 | 3.98E+164 | 0.961646 | 0.998648 |
| Immuno-inflammation | Other disorders of pigmentation (HES)                               | T | 379101 | 706   | 378395 | 9.46E-05 | -9.26604  | 120.531  | 2.39E-107 | 3.75E+98  | 0.938722 | 0.998648 |
| Immuno-inflammation | Seborrheic keratosis (HES)                                          | T | 379101 | 2813  | 376288 | 0.976    | -0.023973 | 1.00443  | 0.136     | 6.99      | 0.980958 | 0.998648 |
| Immuno-inflammation | Corns and callosities (HES)                                         | T | 379101 | 257   | 378844 | 0.00011  | -9.11907  | 194.93   | 1.29E-170 | 9.28E+161 | 0.962688 | 0.998648 |
| Immuno-inflammation | Other epidermal thickening (HES)                                    | T | 379101 | 608   | 378493 | 4.21E-05 | -10.0757  | 196.764  | 1.37E-172 | 1.30E+163 | 0.95916  | 0.998648 |
| Immuno-inflammation | Atrophic disorders of skin (HES)                                    | T | 379101 | 2542  | 376559 | 1.07     | 0.066131  | 1.00424  | 0.149     | 7.65      | 0.947496 | 0.998648 |
| Immuno-inflammation | Hypertrophic disorders of skin (HES)                                | T | 379101 | 1003  | 378098 | 6.82E-05 | -9.59275  | 120.986  | 7.06E-108 | 6.60E+98  | 0.936803 | 0.998648 |
| Immuno-inflammation | Other disorders of skin and subcutaneous tissue (HES)               | T | 379101 | 5075  | 374026 | 1.06     | 0.062258  | 0.712557 | 0.263     | 4.3       | 0.930375 | 0.998648 |
| Musculoskeletal     | Pyogenic arthritis (HES)                                            | T | 379101 | 335   | 378766 | 7.08E-05 | -9.5556   | 198.119  | 1.61E-173 | 3.11E+164 | 0.961532 | 0.998648 |
| Musculoskeletal     | Seropositive rheumatoid arthritis (HES)                             | T | 379101 | 529   | 378572 | 5.13E-05 | -9.87741  | 195.746  | 1.22E-171 | 2.15E+162 | 0.959756 | 0.998648 |
| Musculoskeletal     | Other rheumatoid arthritis (HES)                                    | T | 379101 | 3989  | 375112 | 4.99E-05 | -9.90624  | 172.3742 | 1.23E-66  | 2.01E+57  | 0.891129 | 0.998648 |
| Musculoskeletal     | Gout (HES)                                                          | T | 379101 | 2920  | 376181 | 1.75     | 0.560092  | 0.717425 | 0.429     | 7.14      | 0.43498  | 0.998648 |
| Musculoskeletal     | Other crystal arthropathies (HES)                                   | T | 379101 | 369   | 378732 | 6.62E-05 | -9.62235  | 194.898  | 8.33E-171 | 5.27E+161 | 0.960624 | 0.998648 |
| Musculoskeletal     | Other arthritis (HES)                                               | T | 379101 | 10538 | 368563 | 0.803    | -0.218942 | 0.585373 | 0.255     | 2.53      | 0.708389 | 0.998648 |
| Musculoskeletal     | Polyarthrosis (HES)                                                 | T | 379101 | 3571  | 375530 | 0.833    | -0.183293 | 1.00538  | 0.116     | 5.97      | 0.855338 | 0.998648 |
| Musculoskeletal     | Coxarthrosis (HES)                                                  | T | 379101 | 10780 | 368321 | 1.28     | 0.24356   | 0.458933 | 0.519     | 3.14      | 0.959619 | 0.998648 |
| Musculoskeletal     | Gonarthritis (HES)                                                  | T | 379101 | 18217 | 360884 | 0.721    | -0.327682 | 0.45696  | 0.294     | 1.76      | 0.473318 | 0.998648 |
| Musculoskeletal     | Arthrosis of first carpometacarpal joint (HES)                      | T | 379101 | 1179  | 377922 | 2.42     | 0.883509  | 1.00573  | 0.337     | 17.4      | 0.379685 | 0.998648 |
| Musculoskeletal     | Other arthrosis (HES)                                               | T | 379101 | 14991 | 364110 | 0.734    | -0.309906 | 0.509195 | 0.27      | 1.99      | 0.542777 | 0.998648 |
| Musculoskeletal     | Acquired deformities of fingers and toes (HES)                      | T | 379101 | 8762  | 370339 | 0.982    | -0.018648 | 0.587282 | 0.31      | 3.1       | 0.974669 | 0.998648 |
| Musculoskeletal     | Other acquired deformities of limbs (HES)                           | T | 379101 | 1540  | 377561 | 1.72     | 0.544803  | 1.00436  | 0.241     | 12.3      | 0.587518 | 0.998648 |
| Musculoskeletal     | Disorders of patella (HES)                                          | T | 379101 | 841   | 378260 | 3.03     | 1.10838   | 1.00467  | 0.423     | 21.7      | 0.26993  | 0.998648 |
| Musculoskeletal     | Internal derangement of knee (HES)                                  | T | 379101 | 13926 | 365175 | 1.31     | 0.26929   | 0.388118 | 0.612     | 2.8       | 0.487786 | 0.998648 |
| Musculoskeletal     | Other specific joint derangements (HES)                             | T | 379101 | 2363  | 376738 | 2.22     | 0.79674   | 0.712578 | 0.549     | 8.97      | 0.26352  | 0.998648 |
| Musculoskeletal     | Other joint disorders (HES)                                         | T | 379101 | 11928 | 367173 | 1.14     | 0.128521  | 0.455565 | 0.466     | 2.78      | 0.777856 | 0.998648 |
| Musculoskeletal     | Systemic lupus erythematosus (HES)                                  | T | 379101 | 324   | 378777 | 9.35E-05 | -9.27806  | 192.945  | 5.40E-169 | 1.62E+160 | 0.961647 | 0.998648 |
| Musculoskeletal     | Other systemic involvement of connective tissue (HES)               | T | 379101 | 1710  | 377391 | 4.33E-05 | -10.0476  | 117.454  | 4.54E-105 | 4.12E+95  | 0.931828 | 0.998648 |
| Musculoskeletal     | Scoliosis (HES)                                                     | T | 379101 | 942   | 378159 | 2.96     | 1.08655   | 1.00584  | 0.413     | 21.3      | 0.280032 | 0.998648 |
| Musculoskeletal     | Ankylosing spondylitis (HES)                                        | T | 379101 | 573   | 378528 | 4.30E-05 | -10.0553  | 197.173  | 6.25E-173 | 2.95E+163 | 0.959328 | 0.998648 |
| Musculoskeletal     | Other inflammatory spondylopathies (HES)                            | T | 379101 | 1156  | 377945 | 6.43E-05 | -9.65244  | 119.845  | 6.22E-107 | 6.64E+97  | 0.935807 | 0.998648 |
| Musculoskeletal     | Spondylitis (HES)                                                   | T | 379101 | 6891  | 372210 | 0.813    | -0.207452 | 0.71323  | 0.201     | 3.29      | 0.771157 | 0.998648 |
| Musculoskeletal     | Other spondylopathies (HES)                                         | T | 379101 | 3685  | 375416 | 0.724    | -0.32256  | 1.00453  | 0.101     | 5.19      | 0.74813  | 0.998648 |
| Musculoskeletal     | Cervical disc disorders (HES)                                       | T | 379101 | 1357  | 377744 | 4.94E-05 | -9.91625  | 121.149  | 3.71E-108 | 6.57E+98  | 0.934765 | 0.998648 |
| Musculoskeletal     | Other intervertebral disc disorders (HES)                           | T | 379101 | 6634  | 372467 | 0.802    | -0.221108 | 0.712239 | 0.198     | 3.24      | 0.756225 | 0.998648 |
| Musculoskeletal     | Other dorsopathies (HES)                                            | T | 379101 | 482   | 378619 | 5.36E-05 | -9.84325  | 197.221  | 7.10E-173 | 4.05E+163 | 0.960231 | 0.998648 |
| Musculoskeletal     | Dorsalgia (HES)                                                     | T | 379101 | 13010 | 366091 | 0.834    | -0.181513 | 0.507375 | 0.309     | 2.25      | 0.720532 | 0.998648 |
| Musculoskeletal     | Myositis (HES)                                                      | T | 379101 | 207   | 378894 | 0.000119 | -0.03912  | 198.312  | 1.85E-173 | 7.60E+164 | 0.963645 | 0.998648 |
| Musculoskeletal     | Other disorders of muscle (HES)                                     | T | 379101 | 806   | 378295 | 3.39     | 1.21936   | 1.00461  | 0.473     | 24.2      | 0.224838 | 0.998648 |
| Musculoskeletal     | Synovitis and tenosynovitis                                         |   |        |       |        |          |           |          |           |           |          |          |

|                            |                                                                         |   |        |       |        |          |           |          |           |           |          |          |
|----------------------------|-------------------------------------------------------------------------|---|--------|-------|--------|----------|-----------|----------|-----------|-----------|----------|----------|
| Genitourinary              | Other disorders of kidney and ureter (HES)                              | T | 379101 | 2178  | 376923 | 8.44E-05 | -9.3804   | 72.1904  | 3.00E-66  | 2.38E+57  | 0.896614 | 0.998648 |
| Genitourinary              | Cystitis (HES)                                                          | T | 379101 | 2647  | 376454 | 1.06     | 0.060052  | 1.00453  | 0.148     | 7.61      | 0.95233  | 0.998648 |
| Genitourinary              | Neuromuscular dysfunction of bladder (HES)                              | T | 379101 | 1508  | 377593 | 1.89     | 0.636192  | 1.0046   | 0.264     | 13.5      | 0.526552 | 0.998648 |
| Genitourinary              | Other disorders of bladder (HES)                                        | T | 379101 | 8086  | 371015 | 1.61     | 0.476428  | 0.45924  | 0.655     | 3.96      | 0.299536 | 0.998648 |
| Genitourinary              | Urethral stricture (HES)                                                | T | 379101 | 2967  | 376134 | 0.883    | -0.124199 | 1.0044   | 0.123     | 6.32      | 0.901589 | 0.998648 |
| Genitourinary              | Other disorders of urethra (HES)                                        | T | 379101 | 692   | 378409 | 9.86E-05 | -9.22396  | 119.861  | 9.25E-107 | 1.05E+98  | 0.938659 | 0.998648 |
| Genitourinary              | Other disorders of urinary system (HES)                                 | T | 379101 | 17515 | 361586 | 0.947    | -0.054301 | 0.418736 | 0.417     | 2.15      | 0.896821 | 0.998648 |
| Genitourinary              | Inflammatory diseases of prostate (HES)                                 | T | 379101 | 1436  | 377665 | 1.7      | 0.531593  | 1.00952  | 0.235     | 12.3      | 0.598485 | 0.998648 |
| Genitourinary              | Other disorders of prostate (HES)                                       | T | 379101 | 1235  | 377866 | 5.88E-08 | -16.6491  | 3547.2   | 0         | Inf       | 0.996255 | 0.998648 |
| Genitourinary              | Hydrocele and spermatocele (HES)                                        | T | 379101 | 1221  | 377880 | 5.49E-08 | -16.7175  | 3645.35  | 0         | Inf       | 0.996341 | 0.998648 |
| Genitourinary              | Orchitis and epididymitis (HES)                                         | T | 379101 | 769   | 378332 | 3.18     | 1.15827   | 1.00798  | 0.442     | 23        | 0.250513 | 0.998648 |
| Genitourinary              | Redundant prepuce phimosis and paraphimosis (HES)                       | T | 379101 | 1890  | 377211 | 3.53E-08 | -17.1592  | 3654.34  | 0         | Inf       | 0.996253 | 0.998648 |
| Genitourinary              | Other disorders of penis (HES)                                          | T | 379101 | 1896  | 377205 | 3.75E-05 | -10.192   | 110.294  | 4.89E-99  | 2.87E+89  | 0.926374 | 0.998648 |
| Genitourinary              | Benign mammary dysplasia (HES)                                          | T | 379101 | 1624  | 377477 | 5.45E-05 | -9.81817  | 110.889  | 2.22E-99  | 1.34E+90  | 0.929447 | 0.998648 |
| Genitourinary              | Inflammatory disorders of breast (HES)                                  | T | 379101 | 430   | 378671 | 7.26E-05 | -9.52996  | 187.019  | 4.65E-164 | 1.13E+155 | 0.95936  | 0.998648 |
| Genitourinary              | Hypertrophy of breast (HES)                                             | T | 379101 | 719   | 378382 | 0.000106 | -9.15208  | 119.215  | 3.53E-106 | 3.19E+97  | 0.938807 | 0.998648 |
| Genitourinary              | Unspecified lump in breast (HES)                                        | T | 379101 | 1403  | 377698 | 6.15E-05 | -9.69727  | 112.239  | 1.77E-100 | 2.13E+91  | 0.93115  | 0.998648 |
| Genitourinary              | Other disorders of breast (HES)                                         | T | 379101 | 1110  | 377991 | 2.62     | 0.964691  | 1.00767  | 0.364     | 18.9      | 0.33839  | 0.998648 |
| Genitourinary              | Salpingitis and oophoritis (HES)                                        | T | 379101 | 472   | 378629 | 6.46E-08 | -16.5548  | 5955.72  | 0         | Inf       | 0.997782 | 0.998648 |
| Genitourinary              | Inflammatory disease of uterus except cervix (HES)                      | T | 379101 | 260   | 378841 | 1.19E-07 | -15.9463  | 5977.54  | 0         | Inf       | 0.997871 | 0.998648 |
| Genitourinary              | Inflammatory disease of cervix uteri (HES)                              | T | 379101 | 1044  | 378057 | 7.70E-08 | -16.3796  | 3631.58  | 0         | Inf       | 0.996401 | 0.998648 |
| Genitourinary              | Other female pelvic inflammatory diseases (HES)                         | T | 379101 | 2493  | 376608 | 2.42     | 0.883426  | 0.719734 | 0.59      | 9.92      | 0.21966  | 0.998648 |
| Genitourinary              | Other inflammation of vagina and vulva (HES)                            | T | 379101 | 690   | 378411 | 4.37E-08 | -16.9467  | 6017.17  | 0         | Inf       | 0.997753 | 0.998648 |
| Genitourinary              | Vulvovaginal ulceration and inflammation (HES)                          | T | 379101 | 202   | 378899 | 5.91E-08 | -16.6447  | 9824.75  | 0         | Inf       | 0.998648 | 0.998648 |
| Genitourinary              | Endometriosis (HES)                                                     | T | 379101 | 3557  | 375544 | 6.54E-08 | -16.5429  | 2172.91  | 0         | Inf       | 0.993926 | 0.998648 |
| Genitourinary              | Female genital prolapse (HES)                                           | T | 379101 | 10411 | 368690 | 0.269    | -1.31134  | 1.00816  | 0.0374    | 1.94      | 0.19335  | 0.998648 |
| Genitourinary              | Noninflammatory ovary fallop (HES)                                      | T | 379101 | 4666  | 374435 | 4.69E-08 | -16.8758  | 2195.01  | 0         | Inf       | 0.993866 | 0.998648 |
| Genitourinary              | Polyp of female genital tract (HES)                                     | T | 379101 | 9793  | 369308 | 1.49     | 0.396364  | 0.464129 | 0.598     | 3.69      | 0.393107 | 0.998648 |
| Genitourinary              | Other noninflammatory disorders of uterus except cervix (HES)           | T | 379101 | 4717  | 374384 | 4.48E-08 | -16.9215  | 2205.74  | 0         | Inf       | 0.993879 | 0.998648 |
| Genitourinary              | Erosion and ectropion of cervix uteri (HES)                             | T | 379101 | 830   | 378271 | 1.00E-07 | -16.114   | 3558.13  | 0         | Inf       | 0.996387 | 0.998648 |
| Genitourinary              | Dysplasia of cervix uteri (HES)                                         | T | 379101 | 1404  | 377697 | 5.97E-08 | -16.6338  | 3608.08  | 0         | Inf       | 0.996322 | 0.998648 |
| Genitourinary              | Other noninflammatory disorders of cervix uteri (HES)                   | T | 379101 | 1621  | 377480 | 1.78     | 0.577471  | 1.00785  | 0.247     | 12.8      | 0.566663 | 0.998648 |
| Genitourinary              | Other noninflammatory disorders of vagina (HES)                         | T | 379101 | 1392  | 377709 | 6.08E-05 | -9.70856  | 110.219  | 9.19E-99  | 4.02E+89  | 0.929809 | 0.998648 |
| Genitourinary              | Other noninflammatory disorders of vulva and perineum (HES)             | T | 379101 | 1719  | 377382 | 1.74     | 0.556652  | 1.00758  | 0.242     | 12.6      | 0.580629 | 0.998648 |
| Genitourinary              | Excessive frequent and irregular menstruation (HES)                     | T | 379101 | 11974 | 367127 | 1.02     | 0.016792  | 0.520058 | 0.367     | 2.82      | 0.974242 | 0.998648 |
| Genitourinary              | Other abnormal uterine and vaginal bleeding (HES)                       | T | 379101 | 3736  | 375365 | 1.67     | 0.511886  | 0.718865 | 0.408     | 6.83      | 0.476418 | 0.998648 |
| Genitourinary              | Pain with female genital (HES)                                          | T | 379101 | 3073  | 376028 | 7.53E-08 | -16.4015  | 2164.36  | 0         | Inf       | 0.993954 | 0.998648 |
| Genitourinary              | Menopausal and other perimenopausal disorders (HES)                     | T | 379101 | 9413  | 369688 | 0.607    | -0.498599 | 0.719649 | 0.148     | 2.49      | 0.488412 | 0.998648 |
| Genitourinary              | Female infertility (HES)                                                | T | 379101 | 923   | 378178 | 5.84E-08 | -16.6556  | 5491.54  | 0         | Inf       | 0.99758  | 0.998648 |
| Genitourinary              | Postprocedural disorders of genitourinary system (HES)                  | T | 379101 | 1063  | 378038 | 6.63E-05 | -9.62131  | 118.654  | 6.63E-106 | 6.64E+96  | 0.935373 | 0.998648 |
| Gynaecology and Obstetrics | Ectopic pregnancy (HES)                                                 | T | 379101 | 264   | 378837 | 8.77E-08 | -16.2489  | 8918.05  | 0         | Inf       | 0.998546 | 0.998648 |
| Gynaecology and Obstetrics | Other abnormal products of conception (HES)                             | T | 379101 | 1191  | 377910 | 4.67E-05 | -9.97171  | 165.918  | 2.74E-146 | 7.97E+136 | 0.952076 | 0.998648 |
| Gynaecology and Obstetrics | Spontaneous abortion (HES)                                              | T | 379101 | 1258  | 377843 | 1.08E-07 | -16.0433  | 3332.68  | 0         | Inf       | 0.996159 | 0.998648 |
| Gynaecology and Obstetrics | Gestational hypertension without significant proteinuria (HES)          | T | 379101 | 427   | 378674 | 5.07E-08 | -16.797   | 8807.67  | 0         | Inf       | 0.998478 | 0.998648 |
| Gynaecology and Obstetrics | Gestational hypertension with significant proteinuria (HES)             | T | 379101 | 289   | 378812 | 7.46E-08 | -16.4105  | 8877.31  | 0         | Inf       | 0.998525 | 0.998648 |
| Gynaecology and Obstetrics | Unspecified maternal hypertension (HES)                                 | T | 379101 | 540   | 378561 | 1.10E-07 | -16.0232  | 5337.75  | 0         | Inf       | 0.997605 | 0.998648 |
| Gynaecology and Obstetrics | Haemorrhage in early pregnancy (HES)                                    | T | 379101 | 836   | 378265 | 7.74E-08 | -16.3746  | 5369.23  | 0         | Inf       | 0.997567 | 0.998648 |
| Gynaecology and Obstetrics | Excessive vomiting in pregnancy (HES)                                   | T | 379101 | 202   | 378899 | 1.13E-07 | -15.9969  | 8827.78  | 0         | Inf       | 0.998554 | 0.998648 |
| Gynaecology and Obstetrics | Infections of genitourinary tract in pregnancy (HES)                    | T | 379101 | 212   | 378889 | 1.24E-07 | -15.9038  | 8726.66  | 0         | Inf       | 0.998546 | 0.998648 |
| Gynaecology and Obstetrics | Maternal care for related to pregnancy (HES)                            | T | 379101 | 1641  | 377460 | 1.03E-07 | -16.093   | 3231.98  | 0         | Inf       | 0.996027 | 0.998648 |
| Gynaecology and Obstetrics | Multiple gestation (HES)                                                | T | 379101 | 258   | 378843 | 8.59E-08 | -16.2705  | 8796.48  | 0         | Inf       | 0.998524 | 0.998648 |
| Gynaecology and Obstetrics | Maternal care for known or suspected malpresentation of fetus (HES)     | T | 379101 | 990   | 378111 | 5.99E-08 | -16.3309  | 5313.48  | 0         | Inf       | 0.997503 | 0.998648 |
| Gynaecology and Obstetrics | Maternal care for known or suspected abnormality of pelvic organs (HES) | T | 379101 | 1384  | 377717 | 4.13E-08 | -17.0026  | 5338.78  | 0         | Inf       | 0.997459 | 0.998648 |
| Gynaecology and Obstetrics | Maternal care fetal abnormality and damage (HES)                        | T | 379101 | 238   | 378863 | 9.18E-08 | -16.2035  | 8892.25  | 0         | Inf       | 0.998546 | 0.998648 |
| Gynaecology and Obstetrics | Maternal care for other known or suspected fetal problems (HES)         | T | 379101 | 1716  | 377385 | 9.51E-08 | -16.1682  | 3220.73  | 0         | Inf       | 0.995995 | 0.998648 |
| Gynaecology and Obstetrics | Other disorders of amniotic fluid and membranes (HES)                   | T | 379101 | 236   | 378865 | 8.64E-08 | -16.2647  | 8810.36  | 0         | Inf       | 0.998527 | 0.998648 |
| Gynaecology and Obstetrics | Premature rupture of membranes (HES)                                    | T | 379101 | 1011  | 378090 | 6.22E-08 | -16.5924  | 5279.74  | 0         | Inf       | 0.997493 | 0.998648 |
| Gynaecology and Obstetrics | Placental disorders (HES)                                               | T | 379101 | 225   | 378876 | 1.09E-07 | -16.0276  | 8711.78  | 0         | Inf       | 0.998532 | 0.998648 |
| Gynaecology and Obstetrics | Antepartum haemorrhage (HES)                                            | T | 379101 | 588   | 378513 | 1.00E-07 | -16.1178  | 5324.11  | 0         | Inf       | 0.997585 | 0.998648 |
| Gynaecology and Obstetrics | False labour (HES)                                                      | T | 379101 | 973   | 378128 | 6.47E-08 | -16.5538  | 5290.43  | 0         | Inf       | 0.997503 | 0.998648 |
| Gynaecology and Obstetrics | Prolonged pregnancy (HES)                                               | T | 379101 | 1102  | 377999 | 5.49E-08 | -16.7182  | 5323.05  | 0         | Inf       | 0.997494 | 0.998648 |
| Gynaecology and Obstetrics | Preterm delivery (HES)                                                  | T | 379101 | 602   | 378499 | 1.04E-07 | -16.0817  | 5350.17  | 0         | Inf       | 0.997602 | 0.998648 |
| Gynaecology and Obstetrics | Abnormalities of forces of labour (HES)                                 | T | 379101 | 405   | 378696 | 5.80E-08 | -16.6636  | 8759.15  | 0         | Inf       | 0.998482 | 0.998648 |
| Gynaecology and Obstetrics | Long labour (HES)                                                       | T | 379101 | 1773  | 377328 | 9.76E-08 | -16.1427  | 3188.33  | 0         | Inf       | 0.99596  | 0.998648 |
| Gynaecology and Obstetrics | Obstructed labour malpresentation of fetus (HES)                        | T | 379101 | 382   | 378719 | 6.38E-08 | -16.5678  | 8800.67  | 0         | Inf       | 0.998498 | 0.998648 |
| Gynaecology and Obstetrics | Other obstructed labour (HES)                                           | T | 379101 | 309   | 378792 | 7.56E-08 | -16.3972  | 8740.77  | 0         | Inf       | 0.998503 | 0.998648 |
| Gynaecology and Obstetrics | Labour and delivery complicated by fetal stress (HES)                   | T | 379101 | 3031  | 376070 | 1.49     | 0.400899  | 1.03342  | 0.197     | 11.3      | 0.680605 | 0.998648 |
| Gynaecology and Obstetrics | Labour and delivery complicated by umbilical cord complications (HES)   | T | 379101 | 570   | 378531 | 9.17E-08 | -16.2042  | 5413.19  | 0         | Inf       | 0.997612 | 0.998648 |
| Gynaecology and Obstetrics | Perineal laceration during delivery (HES)                               | T | 379101 | 4945  | 374156 | 0.896    | -0.109482 | 1.03505  | 0.118     | 6.82      | 0.915761 | 0.998648 |
| Gynaecology and Obstetrics | Postpartum haemorrhage (HES)                                            | T | 379101 | 1204  | 377897 | 5.25E-08 | -16.7623  | 5299.5   | 0         | Inf       | 0.997476 | 0.998648 |
| Gynaecology and Obstetrics | Retained placenta and membranes without haemorrhage (HES)               | T | 379101 | 203   | 378898 | 1.01E-07 | -16.1076  | 8889.16  | 0         | Inf       | 0.998554 | 0.998648 |
| Gynaecology and Obstetrics | Other complications of labour and delivery (HES)                        | T | 379101 | 696   | 378405 | 9.05E-08 | -16.2179  | 5336.12  | 0         | Inf       | 0.997575 | 0.998648 |
| Gynaecology and Obstetrics | Single spontaneous delivery (HES)                                       | T | 379101 | 1836  | 377265 | 8.55E-08 | -16.2745  | 3233.88  | 0         | Inf       | 0.995985 | 0.998648 |
| Gynaecology and Obstetrics | Single delivery by caesarean section (HES)                              | T | 379101 | 504   | 378597 | 1.00E-07 | -16.116   | 5393.15  | 0         | Inf       | 0.997616 | 0.998648 |
| Gynaecology and Obstetrics | Other maternal diseases complicating pregnancy (HES)                    | T | 379101 | 1582  | 377519 | 3.15     | 1.14688   | 1.03119  | 0.417     | 23.8      | 0.266057 | 0.998648 |
| Genitourinary              | Cystic kidney disease (HES)                                             | T | 379101 | 414   | 378687 | 5.88E-05 | -9.74063  | 198.465  | 6.81E-174 | 5.09E+164 | 0.960856 | 0.998648 |
| Genitourinary              | Other congenital malformations of kidney (HES)                          | T | 379101 | 214   | 378887 | 0.000111 | -9.10409  | 199.125  | 3.53E-174 | 3.51E+165 | 0.963533 | 0.998648 |
| Symptoms                   | Abnormalities of heart beat (HES)                                       | T | 379101 | 7716  | 371385 | 0.7      | -0.356262 | 0.712812 | 0.173     | 2.83      | 0.617218 | 0.998648 |
| Symptoms                   | Cardiac murmurs and other cardiac sounds (HES)                          | T | 379101 | 965   | 378136 | 7.19E-05 | -9.53983  | 119.924  | 5.96E-107 | 8.68E+97  | 0.936596 | 0.998648 |
| Symptoms                   | Abnormal blood pressure reading without diagnosis (HES)                 | T | 379101 | 2292  | 376809 | 8.02E-05 | -9.43064  | 72.7625  | 9.28E-67  | 6.93E+57  | 0.896876 | 0.998648 |
| Symptoms                   | Cough (HES)                                                             | T | 379101 | 2614  | 376487 | 2.13     | 0.757831  | 0.712989 | 0.527     | 8.63      | 0.28783  | 0.998648 |
| Symptoms                   | Abnormalities of breathing (HES)                                        | T | 379101 | 8413  | 370688 | 1.64     | 0.494835  | 0.456225 | 0.671     | 4.01      | 0.278085 | 0.998648 |
| Symptoms                   | Pain in throat and chest (HES)                                          | T | 379101 | 28963 | 350138 | 0.829    | -0.187731 | 0.345183 | 0.421     | 1.63      | 0.586538 | 0.998648 |
| Symptoms                   | Symptoms the circulatory and respiratory systems (HES)                  | T | 379101 | 1000  | 378101 | 1.76E-05 | -9.60177  | 120.74   | 1.13E-107 | 4.04E+98  | 0.936616 | 0.998648 |
| Symptoms                   | Abdominal and pelvic pain (HES)                                         | T | 379101 | 28298 | 350803 | 1.08     | 0.08056   | 0.314486 | 0.585     | 2.01      | 0.797824 | 0.998648 |
| Symptoms                   | Heartburn (HES)                                                         | T | 379101 | 1828  | 377273 | 3.96E-05 | -10.1362  | 120.19   | 1.95E-107 | 8.05E+97  | 0.93279  | 0.998648 |
| Symptoms                   | Dysphagia (HES)                                                         | T |        |       |        |          |           |          |           |           |          |          |

|            |                                                                         |   |        |        |        |          |           |          |           |           |          |          |
|------------|-------------------------------------------------------------------------|---|--------|--------|--------|----------|-----------|----------|-----------|-----------|----------|----------|
| Symptoms   | Hyperhidrosis (HES)                                                     | T | 379101 | 544    | 378557 | 4.62E-05 | -9.9826   | 198.325  | 7.03E-174 | 3.04E+164 | 0.959856 | 0.998648 |
| Symptoms   | Symptoms and signs concerning food and fluid intake (HES)               | T | 379101 | 5849   | 373252 | 0.934    | -0.068165 | 0.712785 | 0.231     | 3.78      | 0.923813 | 0.998648 |
| Symptoms   | Other general symptoms and signs (HES)                                  | T | 379101 | 358    | 378743 | 7.45E-05 | -9.50447  | 197.343  | 7.77E-173 | 7.15E+163 | 0.961587 | 0.998648 |
| Symptoms   | Unknown and unspecified causes of morbidity (HES)                       | T | 379101 | 14557  | 364544 | 1.48     | 0.393145  | 0.364559 | 0.725     | 3.03      | 0.28085  | 0.998648 |
| Symptoms   | Abnormality of white blood cells (HES)                                  | T | 379101 | 236    | 378865 | 0.000109 | -9.12305  | 199.132  | 3.41E-174 | 3.49E+165 | 0.963458 | 0.998648 |
| Symptoms   | Elevated blood glucose level (HES)                                      | T | 379101 | 625    | 378476 | 0.000114 | -9.07554  | 119.747  | 1.34E-106 | 9.76E+97  | 0.939587 | 0.998648 |
| Symptoms   | Abnormal serum enzyme levels (HES)                                      | T | 379101 | 226    | 378875 | 0.000115 | -9.06636  | 195.043  | 1.09E-170 | 1.22E+162 | 0.962925 | 0.998648 |
| Symptoms   | Other abnormal immunological findings in serum (HES)                    | T | 379101 | 247    | 378854 | 0.000107 | -9.1419   | 188.6    | 3.09E-165 | 3.71E+156 | 0.96134  | 0.998648 |
| Symptoms   | Other abnormal findings of blood chemistry (HES)                        | T | 379101 | 5815   | 373286 | 1.81     | 0.592584  | 0.513176 | 0.662     | 4.95      | 0.248198 | 0.998648 |
| Symptoms   | Isolated proteinuria (HES)                                              | T | 379101 | 277    | 378824 | 9.17E-05 | -9.29735  | 196.703  | 3.35E-172 | 2.51E+163 | 0.962301 | 0.998648 |
| Symptoms   | Other abnormal findings in urine (HES)                                  | T | 379101 | 297    | 378804 | 8.63E-05 | -9.35712  | 197.875  | 3.17E-173 | 2.35E+164 | 0.962284 | 0.998648 |
| Symptoms   | Abnormal findings in specimens from female genital organs (HES)         | T | 379101 | 1312   | 377789 | 6.32E-08 | -16.5773  | 3623.52  | 0         | Inf       | 0.99635  | 0.998648 |
| Symptoms   | Abnormal findings on diagnostic imaging of CNS (HES)                    | T | 379101 | 319    | 378782 | 7.99E-05 | -9.43512  | 198.884  | 4.06E-174 | 1.57E+165 | 0.962162 | 0.998648 |
| Symptoms   | Abnormal findings on diagnostic imaging of lung (HES)                   | T | 379101 | 2263   | 376838 | 8.83E-05 | -9.33463  | 71.7457  | 7.50E-66  | 1.04E+57  | 0.896482 | 0.998648 |
| Symptoms   | Abnormal findings on diagnostic imaging of other body structures (HES)  | T | 379101 | 2807   | 376294 | 0.952    | -0.049551 | 1.00418  | 0.133     | 6.81      | 0.960645 | 0.998648 |
| Symptoms   | Abnormal results of function studies (HES)                              | T | 379101 | 3857   | 375244 | 1.44     | 0.362982  | 0.712984 | 0.355     | 5.81      | 0.61068  | 0.998648 |
| Other      | Poisoning by nonopioid analgesics antipyretics and antirheumatics (HES) | T | 379101 | 1567   | 377534 | 4.64E-05 | -9.97714  | 119.569  | 7.72E-107 | 2.79E+97  | 0.9335   | 0.998648 |
| Other      | Poisoning antiepileptic hypnotic antiparkinsonism drugs (HES)           | T | 379101 | 851    | 378250 | 8.19E-05 | -9.40957  | 120.019  | 5.64E-107 | 1.19E+98  | 0.937509 | 0.998648 |
| Other      | Poisoning by psychotropic drugs (HES)                                   | T | 379101 | 1062   | 378039 | 7.03E-05 | -9.56267  | 119.001  | 3.56E-106 | 1.39E+97  | 0.939593 | 0.998648 |
| Other      | Poisoning by diuretics and other drugs (HES)                            | T | 379101 | 335    | 378766 | 8.26E-05 | -9.40158  | 196.329  | 6.29E-172 | 1.09E+163 | 0.961806 | 0.998648 |
| Other      | Toxic effect of alcohol (HES)                                           | T | 379101 | 912    | 378189 | 8.25E-05 | -9.40278  | 118.85   | 5.61E-106 | 1.21E+97  | 0.936941 | 0.998648 |
| Medication | Tetracyclines                                                           | T | 379101 | 2274   | 376877 | 1.24     | 0.216231  | 1.0039   | 0.174     | 8.88      | 0.829462 | 0.998648 |
| Medication | Beta lactam antibacterials penicillins                                  | T | 379101 | 1102   | 377999 | 6.03E-05 | -9.71545  | 121.151  | 4.52E-108 | 8.06E+98  | 0.936084 | 0.998648 |
| Medication | Other beta lactam antibacterials                                        | T | 379101 | 374    | 378727 | 7.86E-05 | -9.45126  | 192.94   | 4.59E-169 | 1.35E+160 | 0.960931 | 0.998648 |
| Medication | Sulfonamides and trimethoprim                                           | T | 379101 | 595    | 378506 | 4.47E-05 | -10.0159  | 197.714  | 2.25E-173 | 8.87E+163 | 0.959598 | 0.998648 |
| Medication | Aminoglycoside antibacterials                                           | T | 379101 | 622    | 378479 | 0.000108 | -9.13035  | 120.357  | 3.84E-107 | 3.05E+98  | 0.93953  | 0.998648 |
| Medication | Combinations of antibacterials                                          | T | 379101 | 595    | 378506 | 0.000117 | -9.05453  | 120.95   | 1.30E-107 | 1.05E+99  | 0.940325 | 0.998648 |
| Medication | Other antibacterials                                                    | T | 379101 | 1343   | 377758 | 5.26E-05 | -9.85374  | 120.344  | 1.91E-107 | 1.44E+98  | 0.934742 | 0.998648 |
| Medication | Antimycotics for systemic use                                           | T | 379101 | 389    | 378712 | 6.32E-05 | -9.66922  | 198.809  | 3.72E-174 | 1.07E+165 | 0.96121  | 0.998648 |
| Medication | Direct acting antivirals                                                | T | 379101 | 823    | 378278 | 3.04     | 1.11027   | 1.00468  | 0.424     | 21.7      | 0.269113 | 0.998648 |
| Medication | Antimetabolites                                                         | T | 379101 | 2405   | 376696 | 8.01E-05 | -9.43263  | 72.995   | 5.87E-67  | 1.09E+58  | 0.897181 | 0.998648 |
| Medication | Other antineoplastic agents                                             | T | 379101 | 1117   | 377984 | 6.68E-05 | -9.61331  | 119.682  | 8.90E-107 | 5.02E+97  | 0.93598  | 0.998648 |
| Medication | Hormones and related agents                                             | T | 379101 | 756    | 378345 | 8.99E-05 | -9.31647  | 119.948  | 7.11E-107 | 1.14E+98  | 0.93809  | 0.998648 |
| Medication | Immunosuppressants                                                      | T | 379101 | 3722   | 375379 | 0.73     | -0.315269 | 1.00365  | 0.102     | 5.22      | 0.753429 | 0.998648 |
| Medication | Antiinflammatory antirheumatic agents in combination                    | T | 379101 | 53678  | 325423 | 0.803    | -0.219909 | 0.265981 | 0.477     | 1.35      | 0.408358 | 0.998648 |
| Medication | Topical products for joint and muscular pain                            | T | 379101 | 62133  | 316968 | 0.779    | -0.25024  | 0.247234 | 0.48      | 1.26      | 0.311463 | 0.998648 |
| Medication | Muscle relaxants centrally acting agents                                | T | 379101 | 555    | 378546 | 4.51E-05 | -10.0074  | 199.404  | 8.27E-175 | 2.45E+165 | 0.959974 | 0.998648 |
| Medication | Antiquot preparations                                                   | T | 379101 | 4574   | 374527 | 0.53     | -0.634893 | 1.00766  | 0.0735    | 3.82      | 0.528653 | 0.998648 |
| Medication | Other drugs for disorders of the musculo skeletal system                | T | 379101 | 2679   | 376422 | 7.63E-05 | -9.48033  | 71.1345  | 2.15E-65  | 2.71E+56  | 0.893977 | 0.998648 |
| Medication | Anesthetics general                                                     | T | 379101 | 221    | 378880 | 0.000111 | -9.10356  | 199.074  | 3.90E-174 | 3.17E+165 | 0.963526 | 0.998648 |
| Medication | Opioids                                                                 | T | 379101 | 102262 | 276839 | 1.1      | 0.098727  | 0.186249 | 0.766     | 1.59      | 0.596055 | 0.998648 |
| Medication | Other analgesics and antipyretics                                       | T | 379101 | 121055 | 258046 | 1.13     | 0.118501  | 0.177269 | 0.795     | 1.59      | 0.503826 | 0.998648 |
| Medication | Antimigraine preparations                                               | T | 379101 | 5449   | 373652 | 3.54E-05 | -10.2479  | 71.2128  | 8.55E-66  | 1.47E+56  | 0.885575 | 0.998648 |
| Medication | Antiepileptics                                                          | T | 379101 | 6896   | 372205 | 1.18     | 0.166402  | 0.583682 | 0.376     | 3.71      | 0.775574 | 0.998648 |
| Medication | Anticholinergic agents                                                  | T | 379101 | 240    | 378861 | 0.000104 | -9.16664  | 198.383  | 1.42E-173 | 7.69E+164 | 0.963145 | 0.998648 |
| Medication | Dopaminergic agents                                                     | T | 379101 | 1188   | 377913 | 2.32     | 0.839691  | 1.00456  | 0.323     | 16.6      | 0.403222 | 0.998648 |
| Medication | Antipsychotics                                                          | T | 379101 | 2920   | 376181 | 0.916    | -0.08747  | 1.00362  | 0.128     | 6.55      | 0.930549 | 0.998648 |
| Medication | Anxiolytics                                                             | T | 379101 | 1664   | 377437 | 4.11E-05 | -10.1     | 120.939  | 4.66E-108 | 3.62E+98  | 0.933443 | 0.998648 |
| Medication | Hypnotics and sedatives                                                 | T | 379101 | 3007   | 376094 | 1.85     | 0.614547  | 0.713172 | 0.457     | 7.48      | 0.388848 | 0.998648 |
| Medication | Antidepressants                                                         | T | 379101 | 29214  | 349887 | 1.04     | 0.04014   | 0.315019 | 0.561     | 1.93      | 0.898607 | 0.998648 |
| Medication | Psycholeptics and psychoanalectics in combination                       | T | 379101 | 12227  | 366874 | 0.445    | -0.810005 | 0.712283 | 0.11      | 1.8       | 0.254546 | 0.998648 |
| Medication | Anti dementia drugs                                                     | T | 379101 | 2265   | 376836 | 8.78E-05 | -9.34078  | 72.0914  | 3.78E-66  | 2.04E+57  | 0.896908 | 0.998648 |
| Medication | Drugs used in addictive disorders                                       | T | 379101 | 648    | 378453 | 0.000109 | -9.12763  | 120.538  | 2.70E-107 | 4.36E+98  | 0.939638 | 0.998648 |
| Medication | Antivertigo preparations                                                | T | 379101 | 1504   | 377597 | 4.89E-05 | -9.92596  | 119.359  | 1.23E-106 | 1.95E+97  | 0.937274 | 0.998648 |
| Medication | Agents against amoebiasis and other protozoal diseases                  | T | 379101 | 660    | 378441 | 0.000105 | -9.15705  | 120.877  | 1.35E-107 | 8.24E+98  | 0.939614 | 0.998648 |
| Medication | Antimalarials                                                           | T | 379101 | 3446   | 375655 | 5.86E-05 | -9.74508  | 71.8869  | 3.77E-66  | 9.10E+56  | 0.892168 | 0.998648 |
| Medication | Throat preparations                                                     | T | 379101 | 49826  | 329275 | 0.821    | -0.197469 | 0.267077 | 0.486     | 1.39      | 0.459682 | 0.998648 |
| Medication | Expectorants excl combinations with cough suppressants                  | T | 379101 | 1117   | 377984 | 6.91E-05 | -9.58016  | 116.62   | 3.72E-104 | 1.28E+95  | 0.934529 | 0.998648 |
| Medication | Cough suppressants excl combinations with expectorants                  | T | 379101 | 2402   | 376699 | 8.12E-05 | -9.41915  | 72.9549  | 6.44E-67  | 1.02E+58  | 0.897271 | 0.998648 |
| Medication | Antihistamines for systemic use                                         | T | 379101 | 13321  | 365780 | 1.2      | 0.18222   | 0.417437 | 0.529     | 2.72      | 0.662459 | 0.998648 |
| Medication | Antitussives                                                            | T | 379101 | 4005   | 375096 | 2.06     | 0.722084  | 0.583841 | 0.656     | 6.47      | 0.216168 | 0.998648 |
| Medication | Antiinflammatory agents                                                 | T | 379101 | 18165  | 360936 | 0.884    | -0.122833 | 0.41773  | 0.39      | 2.01      | 0.768721 | 0.998648 |
| Medication | Antiinflammatory agents and antitussives in combination                 | T | 379101 | 17347  | 361754 | 0.767    | -0.265364 | 0.455816 | 0.314     | 1.87      | 0.56045  | 0.998648 |
| Medication | Antiglaucoma preparations and miotics                                   | T | 379101 | 4850   | 374251 | 1.11     | 0.106394  | 0.71396  | 0.274     | 4.51      | 0.881538 | 0.998648 |
| Medication | Mydriatics and cycloplegics                                             | T | 379101 | 287    | 378814 | 9.16E-05 | -9.29771  | 198.607  | 8.02E-174 | 1.05E+165 | 0.962661 | 0.998648 |
| Medication | Decongestants and antiallergics                                         | T | 379101 | 420    | 378681 | 6.08E-05 | -9.70738  | 198.98   | 2.56E-174 | 1.44E+165 | 0.96109  | 0.998648 |
| Medication | Surgical aids                                                           | T | 379101 | 1057   | 378044 | 7.63E-05 | -9.48039  | 116.704  | 3.49E-104 | 1.67E+95  | 0.935256 | 0.998648 |
| Medication | Chapter p Chapter X Diseases of the respiratory system BIN (HES)        | T | 379101 | 9049   | 370052 | 1.57     | 0.448144  | 0.456081 | 0.64      | 3.83      | 0.325806 | 0.998648 |
| Medication | Antitussives                                                            | T | 379101 | 1041   | 378060 | 6.66E-05 | -9.61644  | 120.822  | 9.50E-108 | 4.67E+98  | 0.936562 | 0.998648 |
| Medication | Corticosteroids                                                         | T | 379101 | 6270   | 372831 | 1.28     | 0.245137  | 0.58406  | 0.407     | 4.01      | 0.674695 | 0.998648 |
| Medication | Corticosteroids and antitussives in combination 1                       | T | 379101 | 5806   | 373295 | 1.39     | 0.329638  | 0.584049 | 0.443     | 4.37      | 0.572481 | 0.998648 |
| Medication | Antitussives                                                            | T | 379101 | 956    | 378145 | 7.32E-05 | -9.52206  | 120.717  | 1.28E-107 | 4.18E+98  | 0.937129 | 0.998648 |
| Medication | Corticosteroids                                                         | T | 379101 | 4111   | 374990 | 1.31     | 0.268545  | 0.712821 | 0.323     | 5.29      | 0.70637  | 0.998648 |
| Medication | Corticosteroids and antitussives in combination 2                       | T | 379101 | 6221   | 372880 | 1.29     | 0.254503  | 0.584071 | 0.411     | 4.05      | 0.663026 | 0.998648 |
| Medication | All other therapeutic products                                          | T | 379101 | 3557   | 375544 | 1.57     | 0.448109  | 0.713057 | 0.387     | 6.33      | 0.52972  | 0.998648 |
| Medication | Other diagnostic agents                                                 | T | 379101 | 392    | 378709 | 6.46E-05 | -9.6476   | 198.439  | 7.86E-174 | 5.31E+164 | 0.961224 | 0.998648 |
| Medication | Magnetic resonance imaging contrast media                               | T | 379101 | 1522   | 377579 | 4.71E-05 | -9.96416  | 119.298  | 1.33E-106 | 1.66E+97  | 0.933435 | 0.998648 |
| Medication | Hepatic and reticulo endothelial system                                 | T | 379101 | 1728   | 377373 | 1.64     | 0.496679  | 1.00457  | 0.229     | 11.8      | 0.621011 | 0.998648 |
| Medication | Other diagnostic radiopharmaceuticals                                   | T | 379101 | 3824   | 375277 | 0.728    | -0.317666 | 1.00377  | 0.102     | 5.21      | 0.751644 | 0.998648 |
| Cancer     | Lung cancer (self-reported)                                             | T | 379101 | 205    | 378896 | 5.07E-05 | -9.88868  | 314.636  | 7.62E-273 | 3.38E+263 | 0.749427 | 0.998648 |
| Cancer     | Breast cancer (self-reported)                                           | T | 379101 | 8389   | 370712 | 1.4      | 0.33797   | 0.517771 | 0.508     | 3.87      | 0.513924 | 0.998648 |
| Cancer     | Larynx throat cancer (self-reported)                                    | T | 379101 | 289    | 378812 | 9.14E-05 | -9.30045  | 188.78   | 1.85E-165 | 4.50E+156 | 0.960707 | 0.998648 |
| Cancer     | Colon cancer sigmoid cancer (self-reported)                             | T | 379101 | 1220   | 377881 | 5.77E-05 | -9.76042  | 116.882  | 1.86E-104 | 1.79E+95  | 0.933449 | 0.998648 |
| Cancer     | Rectal cancer (self-reported)                                           | T | 379101 | 274    | 378827 | 9.20E-05 | -9.29418  | 196.328  | 7.01E-172 | 1.21E+163 | 0.962242 | 0.998648 |
| Cancer     | Kidney renal cell cancer (self-reported)                                | T | 379101 | 493    | 378608 | 5.02E-05 | -9.89936  | 196.078  | 6.25E-172 | 4.03E+162 | 0.959734 | 0.99     |

|                            |                                                                     |   |        |       |        |          |           |          |           |           |          |          |
|----------------------------|---------------------------------------------------------------------|---|--------|-------|--------|----------|-----------|----------|-----------|-----------|----------|----------|
| ENT                        | Mouth salivary gland surgery (self-reported)                        | T | 379101 | 2330  | 376771 | 7.94E-05 | -9.44042  | 73.3989  | 2.64E-67  | 2.39E+58  | 0.89766  | 0.998648 |
| Operations and Procedures  | Renal kidney transplant (self-reported)                             | T | 379101 | 252   | 378849 | 9.53E-05 | -9.25888  | 198.356  | 1.36E-173 | 6.65E+164 | 0.96277  | 0.998648 |
| Operations and Procedures  | Percutaneous open kidney stone surgery lithotripsy (self-reported)  | T | 379101 | 2177  | 376924 | 8.22E-05 | -9.40587  | 72.3246  | 2.24E-66  | 3.01E+57  | 0.895626 | 0.998648 |
| Operations and Procedures  | Prostate operation (self-reported)                                  | T | 379101 | 859   | 378242 | 3.32E-08 | -17.2196  | 5708.95  | 0         | Inf       | 0.997593 | 0.998648 |
| Operations and Procedures  | Radical prostatectomy (self-reported)                               | T | 379101 | 1237  | 377864 | 1.93     | 0.659243  | 1.01356  | 0.265     | 14.1      | 0.51542  | 0.998648 |
| Operations and Procedures  | Transurethral resection of prostate turp (self-reported)            | T | 379101 | 1932  | 377169 | 2.67     | 0.980877  | 0.729818 | 0.638     | 11.1      | 0.178948 | 0.998648 |
| Operations and Procedures  | Testicular scrotal operation (self-reported)                        | T | 379101 | 2430  | 376671 | 0.962    | -0.038977 | 1.00768  | 0.133     | 6.93      | 0.969146 | 0.998648 |
| Operations and Procedures  | Removal of testicle orchidectomy (self-reported)                    | T | 379101 | 1211  | 377890 | 5.88E-05 | -9.74183  | 110.501  | 5.11E-99  | 6.75E+89  | 0.929749 | 0.998648 |
| Operations and Procedures  | Vasectomy (self-reported)                                           | T | 379101 | 9426  | 369675 | 1.26     | 0.228651  | 0.463981 | 0.506     | 3.12      | 0.622153 | 0.998648 |
| Operations and Procedures  | Other urological surgery (self-reported)                            | T | 379101 | 990   | 378111 | 2.64     | 0.969225  | 1.00457  | 0.368     | 18.9      | 0.334637 | 0.998648 |
| Metabolic                  | Thyroid surgery (self-reported)                                     | T | 379101 | 586   | 378515 | 4.57E-05 | -9.99264  | 192.84   | 3.25E-169 | 6.44E+159 | 0.958673 | 0.998648 |
| Metabolic                  | Thyroid radioablation therapy (self-reported)                       | T | 379101 | 360   | 378741 | 7.85E-05 | -9.45217  | 194.521  | 2.07E-170 | 2.98E+161 | 0.961244 | 0.998648 |
| Metabolic                  | Parathyroidectomy (self-reported)                                   | T | 379101 | 531   | 378570 | 4.80E-05 | -9.94363  | 194.571  | 1.15E-170 | 2.01E+161 | 0.959242 | 0.998648 |
| Operations and Procedures  | Bone surgery joint surgery (self-reported)                          | T | 379101 | 3136  | 375965 | 5.52E-05 | -9.80535  | 73.4398  | 1.69E-67  | 1.80E+58  | 0.893786 | 0.998648 |
| Operations and Procedures  | Muscle soft tissue surgery (self-reported)                          | T | 379101 | 10926 | 368175 | 0.467    | -0.76074  | 0.711989 | 0.116     | 1.89      | 0.285308 | 0.998648 |
| Operations and Procedures  | Hip replacement revision (self-reported)                            | T | 379101 | 6037  | 373064 | 1.36     | 0.308711  | 0.587682 | 0.43      | 4.31      | 0.599373 | 0.998648 |
| Operations and Procedures  | Knee replacement revision (self-reported)                           | T | 379101 | 4614  | 374487 | 0.574    | -0.554633 | 1.00593  | 0.08      | 4.12      | 0.581385 | 0.998648 |
| Operations and Procedures  | Spine or back surgery (self-reported)                               | T | 379101 | 4637  | 374464 | 1.11     | 0.10301   | 0.712368 | 0.274     | 4.48      | 0.885025 | 0.998648 |
| Gynaecology and Obstetrics | Gynaecological surgery (self-reported)                              | T | 379101 | 2168  | 376933 | 2.59     | 0.951003  | 0.718023 | 0.634     | 10.6      | 0.185346 | 0.998648 |
| Gynaecology and Obstetrics | Bilateral oophorectomy (self-reported)                              | T | 379101 | 15863 | 363238 | 1.13     | 0.125207  | 0.429906 | 0.488     | 2.63      | 0.770866 | 0.998648 |
| Gynaecology and Obstetrics | Unilateral oophorectomy (self-reported)                             | T | 379101 | 2254  | 376847 | 3.92E-05 | -10.1469  | 110.3    | 5.06E-99  | 3.04E+89  | 0.926703 | 0.998648 |
| Gynaecology and Obstetrics | Hysterectomy (self-reported)                                        | T | 379101 | 37549 | 341552 | 0.746    | -0.293616 | 0.346683 | 0.378     | 1.47      | 0.397035 | 0.998648 |
| Gynaecology and Obstetrics | Endometrial ablation (self-reported)                                | T | 379101 | 1925  | 377176 | 4.49E-05 | -10.0115  | 109.853  | 1.39E-98  | 1.45E+89  | 0.927385 | 0.998648 |
| Gynaecology and Obstetrics | Vaginal prolapse colposuspension (self-reported)                    | T | 379101 | 3479  | 375622 | 6.77E-08 | -16.5088  | 2174.72  | 0         | Inf       | 0.993943 | 0.998648 |
| Gynaecology and Obstetrics | Sterilisation (self-reported)                                       | T | 379101 | 16084 | 363017 | 0.897    | -0.108583 | 0.464712 | 0.361     | 2.23      | 0.815252 | 0.998648 |
| Gynaecology and Obstetrics | Intrauterine contraceptive device insertion removal (self-reported) | T | 379101 | 624   | 378477 | 4.91E-05 | -9.92167  | 179.032  | 1.98E-157 | 1.22E+148 | 0.955805 | 0.998648 |
| Gynaecology and Obstetrics | Breast surgery (self-reported)                                      | T | 379101 | 1320  | 377781 | 6.27E-05 | -9.6778   | 112.045  | 2.64E-100 | 1.48E+91  | 0.931169 | 0.998648 |
| Gynaecology and Obstetrics | Lumpectomy (self-reported)                                          | T | 379101 | 12746 | 366355 | 0.66     | -0.415114 | 0.589865 | 0.208     | 2.1       | 0.481591 | 0.998648 |
| Gynaecology and Obstetrics | Mammoplasty cosmetic operation on breast (self-reported)            | T | 379101 | 2699  | 376402 | 8.54E-05 | -9.36827  | 67.3328  | 4.14E-62  | 1.76E+53  | 0.889344 | 0.998648 |
| Cardiovascular             | Venous surgery procedures (self-reported)                           | T | 379101 | 246   | 378855 | 0.000107 | -9.13857  | 197.792  | 4.65E-173 | 2.48E+164 | 0.963148 | 0.998648 |
| Operations and Procedures  | Hernia surgery (self-reported)                                      | T | 379101 | 2430  | 376671 | 1.01     | 0.006845  | 1.00548  | 0.14      | 7.23      | 0.994569 | 0.998648 |
| Operations and Procedures  | Umbilical hernia repair (self-reported)                             | T | 379101 | 3357  | 375744 | 1.54     | 0.430596  | 0.712938 | 0.38      | 6.22      | 0.545862 | 0.998648 |
| Operations and Procedures  | Incisional hernia repair (self-reported)                            | T | 379101 | 1461  | 377640 | 1.77     | 0.572506  | 1.00454  | 0.247     | 12.7      | 0.568732 | 0.998648 |
| Operations and Procedures  | Bladder surgery (self-reported)                                     | T | 379101 | 2401  | 376700 | 7.84E-05 | -9.45362  | 72.6581  | 1.11E-66  | 5.52E+57  | 0.896479 | 0.998648 |
| Operations and Procedures  | Transurethral resection bladder tumour turbt (self-reported)        | T | 379101 | 458   | 378643 | 5.83E-05 | -9.74963  | 190.128  | 8.42E-167 | 4.04E+157 | 0.959103 | 0.998648 |
| Operations and Procedures  | Cystectomy (self-reported)                                          | T | 379101 | 1986  | 377115 | 9.05E-05 | -9.30984  | 73.4485  | 2.73E-67  | 3.00E+58  | 0.899136 | 0.998648 |
| Operations and Procedures  | Urethral surgery (self-reported)                                    | T | 379101 | 686   | 378415 | 3.72     | 1.13183   | 1.00458  | 0.519     | 26.7      | 0.19093  | 0.998648 |
| Metabolic                  | Thyroidectomy partial thyroidectomy (self-reported)                 | T | 379101 | 3577  | 375524 | 1.58     | 0.454571  | 0.715364 | 0.388     | 6.4       | 0.525142 | 0.998648 |
| Eye                        | Cataract extraction lens implant (self-reported)                    | T | 379101 | 4095  | 375006 | 1.94     | 0.663061  | 0.586453 | 0.615     | 6.13      | 0.258211 | 0.998648 |
| Eye                        | Glaucoma surgery trabeculectomy (self-reported)                     | T | 379101 | 535   | 378566 | 4.71E-05 | -9.96274  | 194.428  | 1.49E-170 | 1.49E+161 | 0.959133 | 0.998648 |
| Eye                        | Retinal operation vitrectomy (self-reported)                        | T | 379101 | 2253  | 376848 | 1.12     | 0.11655   | 1.00472  | 0.157     | 8.05      | 0.907651 | 0.998648 |
| Operations and Procedures  | Reduction or fixation of bone fracture (self-reported)              | T | 379101 | 17474 | 361627 | 1.47     | 0.386565  | 0.329028 | 0.772     | 2.81      | 0.240047 | 0.998648 |
| Operations and Procedures  | Other thoracic surgery (self-reported)                              | T | 379101 | 1195  | 377906 | 2.12     | 0.749804  | 1.00449  | 0.296     | 15.2      | 0.455395 | 0.998648 |
| Operations and Procedures  | Stomach surgery (self-reported)                                     | T | 379101 | 2197  | 376904 | 1.24     | 0.214709  | 1.00451  | 0.173     | 8.88      | 0.830746 | 0.998648 |
| Operations and Procedures  | Oesophageal surgery (self-reported)                                 | T | 379101 | 447   | 378654 | 5.28E-05 | -9.84981  | 195.972  | 8.08E-172 | 3.44E+162 | 0.959914 | 0.998648 |
| Operations and Procedures  | Pancreas surgery (self-reported)                                    | T | 379101 | 205   | 378896 | 0.000118 | -9.04867  | 198.56   | 1.13E-173 | 1.22E+165 | 0.963652 | 0.998648 |
| Operations and Procedures  | Splenectomy (self-reported)                                         | T | 379101 | 791   | 378310 | 8.22E-05 | -9.40658  | 120.918  | 9.71E-108 | 6.95E+98  | 0.937993 | 0.998648 |
| Operations and Procedures  | Cholecystectomy gall bladder removal (self-reported)                | T | 379101 | 14872 | 364229 | 0.558    | -0.582852 | 0.586275 | 0.177     | 1.76      | 0.320144 | 0.998648 |
| Operations and Procedures  | Appendicectomy (self-reported)                                      | T | 379101 | 45428 | 333673 | 1.35     | 0.297854  | 0.232485 | 0.854     | 2.12      | 0.200132 | 0.998648 |
| Operations and Procedures  | Bowel resection (self-reported)                                     | T | 379101 | 706   | 378395 | 9.84E-05 | -9.22653  | 120.279  | 4.07E-107 | 2.38E+98  | 0.938855 | 0.998648 |
| Operations and Procedures  | Anal surgery (self-reported)                                        | T | 379101 | 2357  | 376744 | 2.17     | 0.776097  | 0.71285  | 0.537     | 8.79      | 0.726276 | 0.998648 |
| Operations and Procedures  | Large bowel resection colostomy (self-reported)                     | T | 379101 | 1039  | 378062 | 2.55     | 0.935675  | 1.00476  | 0.356     | 18.3      | 0.351729 | 0.998648 |
| Operations and Procedures  | Small bowel resection (self-reported)                               | T | 379101 | 657   | 378444 | 0.000103 | -9.18546  | 120.853  | 1.38E-107 | 7.64E+98  | 0.939415 | 0.998648 |
| Operations and Procedures  | Rectal or colon polypectomy (self-reported)                         | T | 379101 | 1567  | 377534 | 1.74     | 0.555386  | 1.00488  | 0.243     | 12.5      | 0.580475 | 0.998648 |
| Operations and Procedures  | Colectomy hemicolectomy (self-reported)                             | T | 379101 | 1636  | 377465 | 1.63     | 0.486556  | 1.0045   | 0.227     | 11.7      | 0.62812  | 0.998648 |
| Operations and Procedures  | Other bowel surgery (self-reported)                                 | T | 379101 | 2282  | 376819 | 8.19E-05 | -9.40967  | 73.1597  | 4.35E-67  | 1.54E+58  | 0.89766  | 0.998648 |
| Operations and Procedures  | Brain surgery (self-reported)                                       | T | 379101 | 1560  | 377541 | 4.15E-05 | -10.0889  | 121.18   | 2.94E-108 | 5.87E+98  | 0.933649 | 0.998648 |
| Operations and Procedures  | Intracranial haematoma drainage (self-reported)                     | T | 379101 | 205   | 378896 | 0.000123 | -9.00456  | 196.703  | 4.49E-172 | 3.85E+163 | 0.963488 | 0.998648 |
| Operations and Procedures  | Spinal cord surgery (self-reported)                                 | T | 379101 | 508   | 378593 | 4.77E-05 | -9.95088  | 199.073  | 1.68E-174 | 1.36E+165 | 0.960134 | 0.998648 |
| Operations and Procedures  | Peripheral nerve surgery (self-reported)                            | T | 379101 | 794   | 378307 | 8.45E-05 | -9.3786   | 121.114  | 6.80E-108 | 1.05E+99  | 0.938277 | 0.998648 |
| Operations and Procedures  | Pituitary surgery (self-reported)                                   | T | 379101 | 215   | 378886 | 0.00012  | -9.0311   | 198.821  | 6.89E-174 | 2.08E+165 | 0.96377  | 0.998648 |
| Operations and Procedures  | Skin operation or plastic surgery (self-reported)                   | T | 379101 | 3215  | 375886 | 0.806    | -0.215827 | 1.00365  | 0.113     | 5.76      | 0.829374 | 0.998648 |
| Gynaecology and Obstetrics | Fertility treatment procedures (self-reported)                      | T | 379101 | 966   | 378135 | 8.63E-05 | -9.35741  | 110.994  | 2.86E-99  | 2.61E+90  | 0.932813 | 0.998648 |
| Gynaecology and Obstetrics | Caesarean section caesarian section (self-reported)                 | T | 379101 | 19341 | 359760 | 1.06     | 0.059135  | 0.399847 | 0.485     | 2.32      | 0.882427 | 0.998648 |
| ENT                        | Wisdom teeth surgery (self-reported)                                | T | 379101 | 15032 | 364069 | 0.985    | -0.014751 | 0.418893 | 0.434     | 2.24      | 0.971909 | 0.998648 |
| ENT                        | Maxillo facial surgery (self-reported)                              | T | 379101 | 2821  | 376280 | 6.19E-05 | -9.69046  | 73.1792  | 3.16E-67  | 1.21E+58  | 0.894651 | 0.998648 |
| Operations and Procedures  | Oesophageal fundoplication hiatus hernia surgery (self-reported)    | T | 379101 | 906   | 378195 | 7.23E-05 | -9.53448  | 120.513  | 1.89E-107 | 2.77E+98  | 0.936941 | 0.998648 |
| Operations and Procedures  | Haemorrhoidectomy piles surgery banding of piles (self-reported)    | T | 379101 | 6713  | 372388 | 0.389    | -0.945444 | 1.00428  | 0.0543    | 2.78      | 0.346494 | 0.998648 |
| Operations and Procedures  | Pilonidal sinus surgery anal (self-reported)                        | T | 379101 | 2174  | 376927 | 8.13E-05 | -9.41697  | 72.3268  | 2.21E-66  | 2.99E+57  | 0.896408 | 0.998648 |
| Operations and Procedures  | Abdominal pelvic adhesion surgery (self-reported)                   | T | 379101 | 1192  | 377909 | 5.99E-05 | -9.72306  | 119.543  | 1.05E-106 | 3.42E+97  | 0.935176 | 0.998648 |
| Operations and Procedures  | Laparotomy nos (self-reported)                                      | T | 379101 | 2106  | 376995 | 1.3      | 0.265729  | 1.00425  | 0.182     | 9.34      | 0.791315 | 0.998648 |
| Operations and Procedures  | Nephrectomy kidney removal (self-reported)                          | T | 379101 | 1353  | 377748 | 1.95     | 0.66788   | 1.00433  | 0.272     | 14        | 0.506052 | 0.998648 |
| Operations and Procedures  | Anterior prolap repair bladder uterus (self-reported)               | T | 379101 | 3518  | 375583 | 0.852    | -0.159915 | 1.00877  | 0.118     | 6.16      | 0.874044 | 0.998648 |
| Operations and Procedures  | Testicular hydrocoele surgery drainage (self-reported)              | T | 379101 | 1140  | 377961 | 5.69E-08 | -16.6824  | 3658.24  | 0         | Inf       | 0.996361 | 0.998648 |
| Operations and Procedures  | Male circumcision (self-reported)                                   | T | 379101 | 3497  | 375604 | 4.95E-08 | -16.8214  | 2210.62  | 0         | Inf       | 0.993929 | 0.998648 |
| Eye                        | Squint correction (self-reported)                                   | T | 379101 | 5064  | 374037 | 3.45E-05 | -10.2755  | 73.4619  | 1.01E-67  | 1.17E+58  | 0.888759 | 0.998648 |
| Operations and Procedures  | Spinal laminectomy (self-reported)                                  | T | 379101 | 3219  | 375882 | 5.58E-05 | -9.79388  | 73.1272  | 3.16E-67  | 9.86E+57  | 0.893458 | 0.998648 |
| Operations and Procedures  | Arthroscopy nos (self-reported)                                     | T | 379101 | 8377  | 370724 | 0.901    | -0.104711 | 0.584073 | 0.287     | 2.83      | 0.857721 | 0.998648 |
| Operations and Procedures  | Foot surgery (self-reported)                                        | T | 379101 | 7430  | 371671 | 0.708    | -0.345863 | 0.712392 | 0.175     | 2.86      | 0.627325 | 0.998648 |
| Operations and Procedures  | Lower limb surgery (self-reported)                                  | T | 379101 | 1770  | 377331 | 3.75E-05 | -10.1916  | 120.176  | 1.90E-107 | 7.41E+97  | 0.932416 | 0.998648 |
| Operations and Procedures  | Knee surgery not replacement (self-reported)                        | T | 379101 | 12555 | 366546 | 1.66     | 0.506956  | 0.365901 | 0.81      | 3.4       | 0.1659   | 0.998648 |
| Operations and Procedures  | Hip surgery not replacement (self-reported)                         | T | 379101 | 1523  | 377578 | 1.65     | 0.503783  | 1.00405  | 0.231     | 11.8      | 0.615842 | 0.998648 |
| Operations and Procedures  | Upper limb surgery (self-reported)                                  | T | 379101 | 2145  | 376956 | 2.5      | 0.917679  | 0.713009 | 0.619     | 10.1      | 0.198077 | 0.998648 |
| Operations and Procedures  | Shoulder surgery (self-reported)                                    | T | 379101 | 5679  | 373422 | 0.896    | -0.110075 | 0.712257 | 0.222     | 3.62      | 0.877225 | 0.998648 |
| Operations and Procedures  | Elbow surgery (self-reported)                                       | T | 379101 | 2248  | 376853 | 7.77E-05 | -9.46305  | 73.2011  | 3.80E-67  | 1.59E     |          |          |

|                            |                                                                  |   |        |        |        |           |           |          |           |           |          |          |
|----------------------------|------------------------------------------------------------------|---|--------|--------|--------|-----------|-----------|----------|-----------|-----------|----------|----------|
| Operations and Procedures  | Lymph node surgery (self-reported)                               | T | 379101 | 763    | 378338 | 3.49      | 1.25088   | 1.00561  | 0.487     | 25.1      | 0.213538 | 0.986648 |
| Gynaecology and Obstetrics | Salpingectomy (self-reported)                                    | T | 379101 | 258    | 378843 | 1.16E-07  | -15.972   | 6003.6   | 0         | Inf       | 0.997877 | 0.986648 |
| Gynaecology and Obstetrics | Termination of pregnancy top (self-reported)                     | T | 379101 | 945    | 378156 | 7.66E-08  | -16.3842  | 3624.1   | 0         | Inf       | 0.996393 | 0.986648 |
| Gynaecology and Obstetrics | Cervical polyps removed (self-reported)                          | T | 379101 | 370    | 378731 | 8.37E-05  | -9.3883   | 181.533  | 2.50E-159 | 2.80E+150 | 0.997754 | 0.986648 |
| Gynaecology and Obstetrics | Laser treatment cervix (self-reported)                           | T | 379101 | 611    | 378490 | 4.81E-08  | -16.8506  | 5958.21  | 0         | Inf       | 0.997743 | 0.986648 |
| Gynaecology and Obstetrics | Pelvic floor surgery (self-reported)                             | T | 379101 | 271    | 378830 | 0.0001108 | -9.05849  | 182.661  | 3.82E-160 | 3.55E+151 | 0.960448 | 0.986648 |
| Gynaecology and Obstetrics | Breast biopsy (self-reported)                                    | T | 379101 | 375    | 378726 | 7.89E-05  | -9.44742  | 182.043  | 8.69E-160 | 7.16E+150 | 0.958611 | 0.986648 |
| Cardiovascular             | Ecg electrocardiogram (self-reported)                            | T | 379101 | 201    | 378900 | 0.000129  | -8.95617  | 197.416  | 1.17E-172 | 1.43E+164 | 0.963815 | 0.986648 |
| Operations and Procedures  | Cystoscopy (self-reported)                                       | T | 379101 | 345    | 378756 | 7.08E-05  | -9.55553  | 197.161  | 1.06E-172 | 4.75E+163 | 0.961345 | 0.986648 |
| Cardiovascular             | Pacemaker insertion (self-reported)                              | T | 379101 | 287    | 378814 | 8.66E-05  | -9.3541   | 190.981  | 2.35E-167 | 3.19E+158 | 0.960936 | 0.986648 |
| Cardiovascular             | Cardiac ablation (self-reported)                                 | T | 379101 | 269    | 378832 | 8.58E-05  | -9.3638   | 197.158  | 1.29E-172 | 5.72E+163 | 0.96212  | 0.986648 |
| ENT                        | Tympanic membrane surgery ear drum repair (self-reported)        | T | 379101 | 602    | 378499 | 0.000108  | -9.13208  | 120.918  | 1.28E-107 | 9.15E+98  | 0.939799 | 0.986648 |
| ENT                        | Rhinoplasty nose surgery (self-reported)                         | T | 379101 | 2193   | 376908 | 7.80E-05  | -9.45934  | 72.8527  | 7.56E-67  | 8.04E+57  | 0.896692 | 0.986648 |
| ENT                        | Sinus surgery (self-reported)                                    | T | 379101 | 1301   | 377800 | 4.86E-05  | -9.93289  | 120.767  | 7.71E-108 | 3.06E+98  | 0.934449 | 0.986648 |
| ENT                        | Nasal polyp surgery nasal polypectomy (self-reported)            | T | 379101 | 1137   | 377964 | 5.74E-05  | -9.76527  | 119.439  | 1.23E-106 | 2.68E+97  | 0.934838 | 0.986648 |
| ENT                        | Tonsillectomy tonsil surgery (self-reported)                     | T | 379101 | 17457  | 361644 | 0.841     | -0.1734   | 0.418071 | 0.371     | 1.91      | 0.678316 | 0.986648 |
| ENT                        | Adenoid surgery adenoidectomy (self-reported)                    | T | 379101 | 2205   | 376896 | 7.53E-05  | -9.49372  | 73.1843  | 3.81E-67  | 1.49E+58  | 0.896785 | 0.986648 |
| Operations and Procedures  | Inguinal hernia repair (self-reported)                           | T | 379101 | 5531   | 373570 | 1.78      | 0.579192  | 0.514596 | 0.651     | 4.89      | 0.260365 | 0.986648 |
| Operations and Procedures  | Femoral hernia repair (self-reported)                            | T | 379101 | 326    | 378775 | 7.15E-05  | -9.54569  | 196.954  | 1.60E-172 | 3.20E+163 | 0.961344 | 0.986648 |
| Operations and Procedures  | Urethral stricture surgery dilatation (self-reported)            | T | 379101 | 205    | 378896 | 0.00012   | -9.02758  | 198.357  | 1.72E-173 | 8.40E+164 | 0.963699 | 0.986648 |
| Operations and Procedures  | Orchidopexy (self-reported)                                      | T | 379101 | 293    | 378808 | 8.08E-08  | -16.3312  | 5990.82  | 0         | Inf       | 0.997825 | 0.986648 |
| Operations and Procedures  | Spinal fusion (self-reported)                                    | T | 379101 | 517    | 378584 | 4.48E-05  | -10.0122  | 198.918  | 2.13E-174 | 9.42E+164 | 0.959857 | 0.986648 |
| Eye                        | Eyelid surgery (self-reported)                                   | T | 379101 | 269    | 378832 | 8.81E-05  | -9.33754  | 199.276  | 2.08E-174 | 3.73E+165 | 0.962627 | 0.986648 |
| Operations and Procedures  | Removal of benign skin lesion (self-reported)                    | T | 379101 | 629    | 378472 | 0.000101  | -9.2011   | 121.131  | 7.86E-108 | 1.30E+99  | 0.939451 | 0.986648 |
| Operations and Procedures  | Removal of rodent ulcer basal cell carcinoma bcc (self-reported) | T | 379101 | 957    | 378144 | 2.77      | 1.01816   | 1.0051   | 0.386     | 19.8      | 0.311066 | 0.986648 |
| Operations and Procedures  | Skin graft (self-reported)                                       | T | 379101 | 649    | 378452 | 9.80E-05  | -9.23031  | 120.694  | 1.80E-107 | 5.35E+98  | 0.93904  | 0.986648 |
| Operations and Procedures  | Mri magnetic resonance imaging (self-reported)                   | T | 379101 | 522    | 378579 | 4.50E-05  | -10.0083  | 199.192  | 1.25E-174 | 1.62E+165 | 0.959928 | 0.986648 |
| Operations and Procedures  | Ct scan (self-reported)                                          | T | 379101 | 307    | 378794 | 7.96E-05  | -9.43912  | 198.573  | 7.45E-174 | 8.50E+164 | 0.962087 | 0.986648 |
| Operations and Procedures  | Bone scan (self-reported)                                        | T | 379101 | 213    | 378888 | 5.02E-05  | -9.8986   | 314.914  | 4.37E-273 | 5.77E+263 | 0.974924 | 0.986648 |
| Operations and Procedures  | Ultrasound scan (self-reported)                                  | T | 379101 | 230    | 378871 | 0.000107  | -9.13865  | 199.172  | 3.11E-174 | 3.71E+165 | 0.963403 | 0.986648 |
| Operations and Procedures  | Barium meal barium swallow (self-reported)                       | T | 379101 | 221    | 378880 | 0.000107  | -9.13992  | 198.145  | 2.32E-173 | 4.95E+164 | 0.963209 | 0.986648 |
| Operations and Procedures  | Biopsy (self-reported)                                           | T | 379101 | 275    | 378826 | 8.62E-05  | -9.35887  | 199.236  | 2.20E-174 | 3.38E+165 | 0.962534 | 0.986648 |
| Operations and Procedures  | Prostate biopsy (self-reported)                                  | T | 379101 | 258    | 378843 | 3.86E-08  | -17.071   | 9507.9   | 0         | Inf       | 0.998567 | 0.986648 |
| Family history             | Alzheimer s disease dementia (family history - father)           | T | 343592 | 15771  | 327821 | 0.479     | -0.735175 | 0.584235 | 0.153     | 1.51      | 0.208263 | 0.986648 |
| Family history             | Parkinson s disease (family history - father)                    | T | 338729 | 8344   | 330385 | 0.298     | -1.20943  | 0.995627 | 0.0424    | 2.1       | 0.224466 | 0.986648 |
| Family history             | Severe depression (family history - father)                      | T | 338729 | 12638  | 326091 | 0.792     | -0.233072 | 0.508233 | 0.293     | 2.14      | 0.646526 | 0.986648 |
| Family history             | Prostate cancer (family history - father)                        | T | 338729 | 25442  | 313287 | 0.869     | -0.140782 | 0.345514 | 0.441     | 1.71      | 0.683672 | 0.986648 |
| Family history             | Stroke (family history - father)                                 | T | 343592 | 51292  | 292300 | 1.13      | 0.121414  | 0.233603 | 0.714     | 1.78      | 0.603242 | 0.986648 |
| Family history             | Lung cancer (family history - father)                            | T | 338729 | 30466  | 308263 | 0.959     | -0.042365 | 0.315719 | 0.516     | 1.78      | 0.893256 | 0.986648 |
| Family history             | Bowel cancer (family history - father)                           | T | 338729 | 19587  | 319142 | 1.05      | 0.046285  | 0.364974 | 0.512     | 2.14      | 0.899085 | 0.986648 |
| Family history             | Chronic bronchitis emphysema (family history - father)           | T | 343592 | 37574  | 306018 | 1.17      | 0.158932  | 0.26793  | 0.693     | 1.98      | 0.553058 | 0.986648 |
| Family history             | Diabetes (family history - father)                               | T | 343592 | 31628  | 311964 | 0.774     | -0.256252 | 0.329701 | 0.406     | 1.48      | 0.437027 | 0.986648 |
| Family history             | Alzheimer s disease dementia (family history - mother)           | T | 357529 | 29815  | 327714 | 0.946     | -0.055457 | 0.316575 | 0.509     | 1.76      | 0.86094  | 0.986648 |
| Family history             | Parkinson s disease (family history - mother)                    | T | 354181 | 5725   | 348456 | 1.34      | 0.294448  | 0.584439 | 0.427     | 4.22      | 0.614392 | 0.986648 |
| Family history             | Severe depression (family history - mother)                      | T | 354181 | 23297  | 330884 | 0.879     | -0.128495 | 0.36482  | 0.43      | 1.8       | 0.724678 | 0.986648 |
| Family history             | Heart disease (family history - mother)                          | T | 357529 | 69487  | 288042 | 0.807     | -0.213964 | 0.233704 | 0.511     | 1.28      | 0.335912 | 0.986648 |
| Family history             | Stroke (family history - mother)                                 | T | 357529 | 49690  | 307839 | 1.06      | 0.057826  | 0.24353  | 0.657     | 1.71      | 0.812308 | 0.986648 |
| Family history             | Lung cancer (family history - mother)                            | T | 354181 | 14282  | 339899 | 0.938     | -0.064246 | 0.456116 | 0.384     | 2.29      | 0.887985 | 0.986648 |
| Family history             | Breast cancer (family history - mother)                          | T | 350614 | 12118  | 338496 | 0.628     | -0.464939 | 0.584019 | 0.2       | 1.97      | 0.425973 | 0.986648 |
| Family history             | High blood pressure (family history - mother)                    | T | 357529 | 106967 | 250562 | 0.841     | -0.173638 | 0.1932   | 0.576     | 1.23      | 0.368787 | 0.986648 |
| Family history             | Diabetes (family history - mother)                               | T | 357529 | 32382  | 325147 | 0.851     | -0.161761 | 0.314356 | 0.459     | 1.58      | 0.606847 | 0.986648 |
| Family history             | Alzheimer s disease dementia (family history - sibling)          | T | 301029 | 1677   | 299352 | 3.48E-05  | -10.2664  | 123.064  | 6.13E-110 | 1.97E+100 | 0.933515 | 0.986648 |
| Family history             | Parkinson s disease (family history - sibling)                   | T | 301236 | 1576   | 299660 | 3.38E-05  | -10.2946  | 124.634  | 2.74E-111 | 4.17E+101 | 0.934171 | 0.986648 |
| Family history             | Severe depression (family history - sibling)                     | T | 301236 | 21287  | 279949 | 0.799     | -0.224484 | 0.389536 | 0.372     | 1.71      | 0.564421 | 0.986648 |
| Family history             | Prostate cancer (family history - sibling)                       | T | 301236 | 4736   | 296500 | 1.98      | 0.680626  | 0.513306 | 0.722     | 5.4       | 0.184851 | 0.986648 |
| Family history             | Stroke (family history - sibling)                                | T | 301029 | 9517   | 291512 | 0.77      | -0.261321 | 0.587049 | 0.244     | 2.43      | 0.656216 | 0.986648 |
| Family history             | Lung cancer (family history - sibling)                           | T | 301236 | 6394   | 294842 | 1.748     | -0.290672 | 0.716304 | 0.184     | 3.04      | 0.684894 | 0.986648 |
| Family history             | Bowel cancer (family history - sibling)                          | T | 301236 | 7001   | 294235 | 1.02      | 0.017837  | 0.587534 | 0.322     | 3.22      | 0.975781 | 0.986648 |
| Family history             | Breast cancer (family history - sibling)                         | T | 298653 | 4866   | 293787 | 3.06E-05  | -10.3935  | 76.8364  | 1.21E-70  | 7.77E+60  | 0.8924   | 0.986648 |
| Family history             | High blood pressure (family history - sibling)                   | T | 301029 | 61052  | 239977 | 0.996     | -0.003754 | 0.225962 | 0.64      | 1.55      | 0.986746 | 0.986648 |
| Family history             | Diabetes (family history - sibling)                              | T | 301029 | 24485  | 276544 | 0.994     | -0.006021 | 0.331201 | 0.519     | 1.9       | 0.985496 | 0.986648 |
| Mental health              | Single episode of probable major depression                      | T | 54642  | 7501   | 47141  | 1.21      | 0.189594  | 0.450399 | 0.5       | 2.92      | 0.673793 | 0.986648 |
| Mental health              | Probable recurrent major depression severe 2                     | T | 54213  | 7072   | 47141  | 0.436     | -0.83099  | 0.729194 | 0.104     | 1.82      | 0.254453 | 0.986648 |
| Mental health              | Bipolar I Disorder                                               | T | 91515  | 595    | 90920  | 2.68E-05  | -10.5259  | 208.411  | 1.06E-182 | 6.79E+172 | 0.95972  | 0.986648 |
| Mental health              | Bipolar II Disorder                                              | T | 91515  | 531    | 90984  | 2.91E-05  | -10.4442  | 208.973  | 3.83E-183 | 2.22E+173 | 0.960139 | 0.986648 |
| Mental health              | Probable Recurrent major depression severe 1                     | T | 91515  | 6715   | 84800  | 0.54      | -0.617052 | 0.72308  | 0.131     | 2.23      | 0.393456 | 0.986648 |
| Mental health              | Probable Recurrent major depression moderate                     | T | 91515  | 11528  | 79987  | 0.445     | -0.809761 | 0.599102 | 0.138     | 1.44      | 0.176495 | 0.986648 |
| Mental health              | Risk taking                                                      | T | 365648 | 96122  | 269526 | 1.02      | 0.023915  | 0.193605 | 0.701     | 1.5       | 0.901691 | 0.986648 |
| Mental health              | Seen doctor GP for nerves anxiety tension or depression          | T | 373720 | 129804 | 246635 | 0.889     | -0.117802 | 0.183884 | 0.62      | 1.27      | 0.521763 | 0.986648 |
| Mental health              | Seen a psychiatrist for nerves anxiety tension or depression     | T | 373720 | 43632  | 333688 | 0.837     | -0.177722 | 0.281533 | 0.482     | 1.45      | 0.527867 | 0.986648 |
| Eye                        | Wears glasses or contact lenses                                  | T | 378528 | 337207 | 41321  | 0.752     | -0.285564 | 0.267739 | 0.445     | 1.27      | 0.286162 | 0.986648 |
| Eye                        | Other eye problems                                               | T | 379758 | 54312  | 323646 | 1.02      | 0.023358  | 0.236947 | 0.643     | 1.63      | 0.921473 | 0.986648 |
| ENT                        | Hearing difficulty problems                                      | T | 363644 | 94775  | 268869 | 0.805     | -0.216853 | 0.21039  | 0.533     | 1.22      | 0.302671 | 0.986648 |
| ENT                        | Hearing difficulty problems with background noise                | T | 371480 | 140624 | 230856 | 0.825     | -0.192618 | 0.181576 | 0.578     | 1.18      | 0.288777 | 0.986648 |
| Other                      | Hair balding pattern                                             | T | 173279 | 117813 | 55466  | 0.795     | -0.228994 | 0.24481  | 0.492     | 1.29      | 0.349584 | 0.986648 |
| Other                      | Pattern 1 f                                                      | T | 173279 | 55466  | 117813 | 1.26      | 0.228994  | 0.24481  | 0.778     | 2.03      | 0.349584 | 0.986648 |
| Other                      | Pattern 2 f                                                      | T | 173279 | 39959  | 133320 | 0.726     | -0.320811 | 0.307894 | 0.397     | 1.33      | 0.297434 | 0.986648 |
| Other                      | Pattern 3 f                                                      | T | 173279 | 46281  | 126998 | 1.15      | 0.139075  | 0.261663 | 0.688     | 1.92      | 0.59507  | 0.986648 |
| Other                      | Pattern 4 f                                                      | T | 173279 | 31573  | 141706 | 0.821     | -0.197367 | 0.328705 | 0.431     | 1.56      | 0.548214 | 0.986648 |
| Gynaecology and Obstetrics | Ever had stillbirth spontaneous miscarriage or termination       | T | 201246 | 64150  | 137096 | 1.36      | 0.310036  | 0.243565 | 0.846     | 2.2       | 0.203045 | 0.986648 |
| Gynaecology and Obstetrics | Bilateral oophorectomy both ovaries removed                      | T | 201585 | 16364  | 185221 | 1.09      | 0.089657  | 0.430442 | 0.47      | 2.54      | 0.835002 | 0.986648 |
| Neurosciences              | General pain for 3 months vs no pain                             | T | 377203 | 4819   | 372384 | 0.572     | -0.558517 | 1.00374  | 0.08      | 4.09      | 0.577911 | 0.986648 |
| ENT                        | Hearing aid user                                                 | T | 230555 | 11351  | 219204 | 0.698     | -0.359241 | 0.592056 | 0.219     | 2.23      | 0.544005 | 0.986648 |
| Neurosciences              | Neck shoulder pain for 3 months vs no pain                       | T | 344932 | 58990  | 285942 | 0.889     | -0.117952 | 0.243007 | 0.552     | 1.43      | 0.627403 | 0.986648 |
| Gynaecology and Obstetrics | Ever had hysterectomy womb removed                               | T | 180543 | 14618  | 165925 | 0.58      | -0.543986 | 0.601126 | 0.179     | 1.89      | 0.365494 | 0.986648 |
| Neurosciences              | Headaches for 3 months vs no pain                                | T | 330531 | 33891  | 296640 | 1.21      | 0.189505  | 0.279521 | 0.699     | 2.09      | 0.49779  |          |

|                           |                                                                   |   |        |        |        |          |           |          |           |            |          |          |
|---------------------------|-------------------------------------------------------------------|---|--------|--------|--------|----------|-----------|----------|-----------|------------|----------|----------|
| Cancer                    | Carc in situ of skin (cancer register)                            | T | 379101 | 1157   | 377944 | 6.84E-05 | -9.58975  | 115.551  | 2.99E-103 | 1.56E+94   | 0.933859 | 0.998648 |
| Cancer                    | Carc in situ of breast (cancer register)                          | T | 379101 | 1900   | 377201 | 4.57E-05 | -9.99368  | 109.987  | 1.09E-98  | 1.92E+89   | 0.927602 | 0.998648 |
| Cancer                    | Carc in situ of cervix (cancer register)                          | T | 379101 | 2991   | 376110 | 7.97E-08 | -16.3448  | 2184.63  | 0         | Inf        | 0.99403  | 0.998648 |
| Cancer                    | Carc in situ other genital (cancer register)                      | T | 379101 | 466    | 378635 | 5.28E-05 | -9.8487   | 194.977  | 5.69E-171 | 1.490E+161 | 0.959714 | 0.998648 |
| Cancer                    | Carc in situ of other sites (cancer register)                     | T | 379101 | 561    | 378540 | 4.93E-05 | -9.91846  | 188.321  | 2.46E-165 | 9.88E+155  | 0.957996 | 0.998648 |
| Cancer                    | Benign neoplasm of meninges (cancer register)                     | T | 379101 | 350    | 378751 | 7.50E-05 | -9.49746  | 195.508  | 2.85E-171 | 1.97E+162  | 0.961255 | 0.998648 |
| Cancer                    | Neo of oral cavity and digestive (cancer register)                | T | 379101 | 341    | 378760 | 7.20E-05 | -9.53877  | 196.017  | 1.01E-171 | 5.13E+162  | 0.961188 | 0.998648 |
| Cancer                    | Neo of urinary organs (cancer register)                           | T | 379101 | 723    | 378378 | 9.54E-05 | -9.25725  | 116.187  | 1.20E-103 | 7.59E+94   | 0.936495 | 0.998648 |
| Cancer                    | Neo of lymphoid haematopoietic (cancer register)                  | T | 379101 | 292    | 378809 | 9.04E-05 | -9.31178  | 195.435  | 3.97E-171 | 2.06E+162  | 0.961998 | 0.998648 |
| Cancer                    | Neo of other sites (cancer register)                              | T | 379101 | 206    | 378895 | 0.000109 | -9.12172  | 198.301  | 1.74E-173 | 6.85E+164  | 0.963311 | 0.998648 |
| Summary                   | Mal neo of lip oral cavity and pharynx (cancer register)          | T | 379101 | 799    | 378302 | 8.38E-05 | -9.38767  | 119.648  | 1.19E-106 | 5.88E+97   | 0.937462 | 0.998648 |
| Summary                   | Mal neo of digestive organs (cancer register)                     | T | 379101 | 5957   | 373144 | 0.438    | -0.825382 | 1.00505  | 0.0611    | 3.14       | 0.411511 | 0.998648 |
| Summary                   | Mal neo of respiratory and intrathoracic organs (cancer register) | T | 379101 | 2026   | 377075 | 3.73E-05 | -10.1965  | 116.301  | 3.75E-104 | 3.71E+94   | 0.930136 | 0.998648 |
| Summary                   | Melanoma and other mal neo of skin (cancer register)              | T | 379101 | 2611   | 376490 | 2        | 0.695261  | 0.712721 | 0.496     | 8.1        | 0.329311 | 0.998648 |
| Summary                   | Mal neo of mesothelial and soft tissue (cancer register)          | T | 379101 | 538    | 378563 | 4.70E-05 | -9.96617  | 196.294  | 3.83E-172 | 5.76E+162  | 0.959507 | 0.998648 |
| Summary                   | Mal neoplasm of breast (cancer register)                          | T | 379101 | 10158  | 368943 | 1.47     | 0.383264  | 0.465272 | 0.589     | 3.65       | 0.410086 | 0.998648 |
| Summary                   | Mal neo of female genital organs (cancer register)                | T | 379101 | 2734   | 376367 | 1.08     | 0.077513  | 1.00833  | 0.15      | 7.8        | 0.938725 | 0.998648 |
| Summary                   | Mal neo of male genital organs (cancer register)                  | T | 379101 | 7046   | 372055 | 1.03     | 0.025753  | 0.596185 | 0.319     | 3.3        | 0.965545 | 0.998648 |
| Summary                   | Mal neo of urinary tract (cancer register)                        | T | 379101 | 1919   | 377182 | 1.31     | 0.271644  | 1.00668  | 0.182     | 9.44       | 0.787282 | 0.998648 |
| Summary                   | Mal neo of thyroid and other endocrine glands (cancer register)   | T | 379101 | 468    | 378633 | 5.61E-05 | -9.78811  | 198.078  | 1.39E-173 | 2.27E+164  | 0.960588 | 0.998648 |
| Summary                   | Mal neo of ill secondary unspecified (cancer register)            | T | 379101 | 433    | 378668 | 5.90E-05 | -9.73818  | 197.188  | 8.34E-173 | 4.17E+163  | 0.960612 | 0.998648 |
| Summary                   | Mal neo lymphoid haematopoietic (cancer register)                 | T | 379101 | 3145   | 375956 | 0.83     | -0.186345 | 1.00458  | 0.116     | 5.95       | 0.852841 | 0.998648 |
| Summary                   | In situ neo (cancer register)                                     | T | 379101 | 8358   | 370743 | 0.332    | -1.10248  | 1.00431  | 0.0464    | 2.38       | 0.727313 | 0.998648 |
| Summary                   | Benign neo (cancer register)                                      | T | 379101 | 784    | 378317 | 8.49E-05 | -9.37375  | 120.695  | 1.55E-107 | 4.64E+98   | 0.938094 | 0.998648 |
| Summary                   | Neo of uncertain or unknown behaviour (cancer register)           | T | 379101 | 2117   | 376984 | 1.21     | 0.192562  | 1.00474  | 0.169     | 8.69       | 0.848015 | 0.998648 |
| Summary                   | Neoplasms B1N (cancer register)                                   | T | 379101 | 45225  | 333876 | 0.814    | -0.205852 | 0.28377  | 0.467     | 1.42       | 0.468195 | 0.998648 |
| Neurosciences             | Facial pains for 3 months vs no pain                              | T | 379101 | 368676 | 3287   | 365389   | 5.70E-05  | -9.7728  | 2.40E-67  | 1.35E+58   | 0.893903 | 0.998648 |
| Operations and Procedures | Excision of lesion of tissue of brain                             | T | 379101 | 434    | 378667 | 5.50E-05 | -9.80741  | 199.425  | 9.70E-175 | 3.12E+165  | 0.960777 | 0.998648 |
| Operations and Procedures | Other operations on ventricle of brain                            | T | 379101 | 227    | 378874 | 0.000109 | -9.12603  | 199.041  | 4.07E-174 | 2.91E+165  | 0.96343  | 0.998648 |
| Operations and Procedures | Extrirapation of lesion of meninges of brain                      | T | 379101 | 289    | 378812 | 9.06E-05 | -9.30919  | 197.083  | 1.57E-172 | 5.22E+163  | 0.962326 | 0.998648 |
| Operations and Procedures | Drainage of subdural space                                        | T | 379101 | 236    | 378865 | 0.000108 | -9.136    | 191.71   | 7.01E-168 | 1.66E+159  | 0.961991 | 0.998648 |
| Operations and Procedures | Other operations on spinal cord                                   | T | 379101 | 218    | 378883 | 0.000115 | -9.06845  | 198.811  | 6.77E-174 | 1.96E+165  | 0.963618 | 0.998648 |
| Operations and Procedures | Therapeutic epidural injection                                    | T | 379101 | 4695   | 374406 | 3.89E-05 | -10.1543  | 73.2697  | 1.67E-67  | 9.09E+57   | 0.889776 | 0.998648 |
| Operations and Procedures | Therapeutic spinal puncture                                       | T | 379101 | 253    | 378848 | 0.000101 | -9.20442  | 199.093  | 3.40E-174 | 2.98E+165  | 0.963126 | 0.998648 |
| Operations and Procedures | Diagnostic spinal puncture                                        | T | 379101 | 4837   | 374264 | 1.12     | 0.110771  | 0.712366 | 0.277     | 4.51       | 0.876429 | 0.998648 |
| Operations and Procedures | Operations on spinal nerve root                                   | T | 379101 | 2302   | 376799 | 1.16     | 0.15257   | 1.00393  | 0.163     | 8.33       | 0.879208 | 0.998648 |
| Operations and Procedures | Destruction of peripheral nerve                                   | T | 379101 | 243    | 378858 | 9.70E-05 | -9.24038  | 198.249  | 1.71E-173 | 5.49E+164  | 0.962824 | 0.998648 |
| Operations and Procedures | Extrirapation of lesion of peripheral nerve                       | T | 379101 | 1390   | 377711 | 5.22E-05 | -9.86011  | 118.991  | 2.70E-106 | 1.01E+97   | 0.93396  | 0.998648 |
| Operations and Procedures | Microsurgical repair of peripheral nerve                          | T | 379101 | 222    | 378879 | 0.000101 | -9.20526  | 196.001  | 1.45E-171 | 6.94E+162  | 0.962541 | 0.998648 |
| Operations and Procedures | Other repair of peripheral nerve                                  | T | 379101 | 526    | 378575 | 4.87E-05 | -9.93076  | 197.763  | 2.23E-173 | 1.06E+164  | 0.959591 | 0.998648 |
| Operations and Procedures | Release of entrapment of peripheral nerve at wrist                | T | 379101 | 8745   | 370356 | 0.304    | -1.19069  | 1.00399  | 0.0425    | 2.18       | 0.23564  | 0.998648 |
| Operations and Procedures | Release of entrapment of peripheral nerve at other site           | T | 379101 | 778    | 378323 | 8.37E-05 | -9.38806  | 120.898  | 1.03E-107 | 6.81E+98   | 0.938104 | 0.998648 |
| Operations and Procedures | Other release of peripheral nerve                                 | T | 379101 | 324    | 378777 | 7.56E-05 | -9.48953  | 198.517  | 7.90E-174 | 7.24E+164  | 0.961874 | 0.998648 |
| Operations and Procedures | Neurostimulation of peripheral nerve                              | T | 379101 | 545    | 378556 | 4.77E-05 | -9.95     | 197.293  | 5.49E-173 | 4.15E+163  | 0.959778 | 0.998648 |
| Operations and Procedures | Neurophysiological operations                                     | T | 379101 | 2161   | 376940 | 8.73E-05 | -9.34619  | 72.9277  | 7.38E-67  | 1.03E+58   | 0.880818 | 0.998648 |
| Operations and Procedures | Excision of thyroid gland                                         | T | 379101 | 1898   | 377203 | 1.5      | 0.406797  | 1.00503  | 0.209     | 10.8       | 0.685653 | 0.998648 |
| Operations and Procedures | Excision of parathyroid gland                                     | T | 379101 | 695    | 378406 | 0.000104 | -9.17512  | 117.958  | 4.05E-105 | 2.65E+96   | 0.938    | 0.998648 |
| Operations and Procedures | Total excision of breast                                          | T | 379101 | 4061   | 375040 | 2.19     | 0.782537  | 0.589738 | 0.688     | 6.95       | 0.184534 | 0.998648 |
| Operations and Procedures | Other excision of breast                                          | T | 379101 | 9523   | 369578 | 1.24     | 0.212441  | 0.515105 | 0.451     | 3.39       | 0.680029 | 0.998648 |
| Operations and Procedures | Reconstruction of breast                                          | T | 379101 | 1391   | 377710 | 5.71E-08 | -16.6781  | 3648.16  | 0         | Inf        | 0.986352 | 0.998648 |
| Operations and Procedures | Prosthesis for breast                                             | T | 379101 | 1450   | 377651 | 5.88E-05 | -9.74162  | 110.435  | 5.82E-99  | 5.94E+89   | 0.929709 | 0.998648 |
| Operations and Procedures | Other plastic operations on breast                                | T | 379101 | 1690   | 377411 | 5.43E-05 | -9.82109  | 110.347  | 6.39E-99  | 4.61E+89   | 0.929081 | 0.998648 |
| Operations and Procedures | Biopsy of breast                                                  | T | 379101 | 1566   | 377535 | 5.76E-05 | -9.76246  | 110.694  | 3.43E-99  | 9.66E+89   | 0.929723 | 0.998648 |
| Operations and Procedures | Incision of breast                                                | T | 379101 | 615    | 378486 | 5.03E-05 | -9.8973   | 186.17   | 1.70E-163 | 1.49E+154  | 0.957602 | 0.998648 |
| Operations and Procedures | Operations on duct of breast                                      | T | 379101 | 761    | 378340 | 3.87     | 1.35212   | 1.00815  | 0.536     | 27.9       | 0.179858 | 0.998648 |
| Operations and Procedures | Operations on nipple                                              | T | 379101 | 610    | 378491 | 5.15E-05 | -9.87322  | 187.963  | 5.19E-165 | 5.12E+155  | 0.958108 | 0.998648 |
| Operations and Procedures | Reconstruction of nipple and areola                               | T | 379101 | 637    | 378464 | 5.00E-05 | -9.90291  | 181.816  | 8.60E-160 | 2.91E+150  | 0.956563 | 0.998648 |
| Operations and Procedures | Other operations on breast                                        | T | 379101 | 910    | 378191 | 9.71E-05 | -9.24024  | 110.682  | 5.92E-99  | 1.59E+90   | 0.933466 | 0.998648 |
| Operations and Procedures | Reconstruction of breast using abdominal flap                     | T | 379101 | 275    | 378826 | 1.08E-07 | -16.0414  | 5978.55  | 0         | Inf        | 0.997859 | 0.998648 |
| Operations and Procedures | Operations on eyebrow                                             | T | 379101 | 613    | 378488 | 0.000112 | -9.09931  | 120.216  | 5.23E-107 | 2.39E+98   | 0.939665 | 0.998648 |
| Operations and Procedures | Extrirapation of lesion of eyelid                                 | T | 379101 | 5517   | 373584 | 0.988    | -0.012001 | 0.712516 | 0.245     | 3.99       | 0.986562 | 0.998648 |
| Operations and Procedures | Excision of redundant skin of eyelid                              | T | 379101 | 1118   | 377983 | 6.49E-05 | -9.64338  | 118.739  | 5.49E-106 | 7.67E+96   | 0.935271 | 0.998648 |
| Operations and Procedures | Reconstruction of eyelid                                          | T | 379101 | 382    | 378719 | 6.77E-05 | -9.60077  | 196.541  | 3.40E-172 | 1.35E+163  | 0.96104  | 0.998648 |
| Operations and Procedures | Correction of deformity of eyelid                                 | T | 379101 | 816    | 378285 | 3.21     | 1.16599   | 1.00746  | 0.445     | 23.1       | 0.247126 | 0.998648 |
| Operations and Procedures | Correction of ptosis of eyelid                                    | T | 379101 | 747    | 378354 | 3.53     | 1.26131   | 1.00588  | 0.492     | 25.4       | 0.209864 | 0.998648 |
| Operations and Procedures | Other operations on eyelid                                        | T | 379101 | 931    | 378170 | 2.99     | 1.09569   | 1.00481  | 0.417     | 21.4       | 0.27552  | 0.998648 |
| Operations and Procedures | Connection between lacrimal apparatus and nose                    | T | 379101 | 711    | 378390 | 0.000105 | -9.15894  | 118.418  | 1.67E-105 | 6.63E+96   | 0.93835  | 0.998648 |
| Operations and Procedures | Operations on nasolacrimal duct                                   | T | 379101 | 416    | 378685 | 6.69E-05 | -9.61261  | 196.252  | 5.92E-172 | 7.56E+162  | 0.960935 | 0.998648 |
| Operations and Procedures | Other operations on lacrimal apparatus                            | T | 379101 | 939    | 378162 | 7.76E-05 | -9.4637   | 118.891  | 4.87E-106 | 1.24E+97   | 0.936556 | 0.998648 |
| Operations and Procedures | Combined operations on muscles of eye                             | T | 379101 | 370    | 378731 | 6.71E-05 | -9.60954  | 199.584  | 8.66E-175 | 5.20E+165  | 0.961598 | 0.998648 |
| Operations and Procedures | Other adjustment to muscle of eye                                 | T | 379101 | 211    | 378890 | 0.000117 | -9.05179  | 199.101  | 3.90E-174 | 3.52E+165  | 0.963738 | 0.998648 |
| Operations and Procedures | Extrirapation of lesion of conjunctiva                            | T | 379101 | 351    | 378750 | 7.18E-05 | -9.54164  | 198.577  | 6.67E-174 | 7.73E+164  | 0.961676 | 0.998648 |
| Operations and Procedures | Closure of cornea                                                 | T | 379101 | 204    | 378897 | 0.000122 | -9.01187  | 198.676  | 9.33E-174 | 1.59E+165  | 0.963821 | 0.998648 |
| Operations and Procedures | Buckling operations for attachment of retina                      | T | 379101 | 659    | 378442 | 3.83     | 1.34392   | 1.0053   | 0.534     | 27.5       | 0.181277 | 0.998648 |
| Operations and Procedures | Filtering operations on iris                                      | T | 379101 | 833    | 378268 | 3.19     | 1.15936   | 1.0036   | 0.444     | 22.9       | 0.249134 | 0.998648 |
| Operations and Procedures | Other operations on trabecular meshwork of eye                    | T | 379101 | 236    | 378865 | 0.000113 | -9.08543  | 195.404  | 5.28E-171 | 2.43E+162  | 0.962915 | 0.998648 |
| Operations and Procedures | Incision of iris                                                  | T | 379101 | 599    | 378502 | 4.24E-05 | -10.0677  | 195.431  | 1.88E-171 | 9.59E+161  | 0.958915 | 0.998648 |
| Operations and Procedures | Other operations on anterior chamber of eye                       | T | 379101 | 405    | 378696 | 6.25E-05 | -9.67956  | 195.602  | 1.98E-171 | 1.98E+162  | 0.960532 | 0.998648 |
| Operations and Procedures | Extracapsular extraction of lens                                  | T | 379101 | 17912  | 361189 | 1.25     | 0.222891  | 0.372165 | 0.603     | 2.59       | 0.549237 | 0.998648 |
| Operations and Procedures | Prosthesis of lens                                                | T | 379101 | 17908  | 361193 | 1.25     | 0.222107  | 0.372086 | 0.602     | 2.59       | 0.550559 | 0.998648 |
| Operations and Procedures | Operations on vitreous body                                       | T | 379101 | 3853   | 375248 | 4.73E-05 | -9.95839  | 72.0345  | 2.28E-66  | 9.82E+56   | 0.890047 | 0.998648 |
| Operations and Procedures | Operations on retinal membrane                                    | T | 379101 | 983    | 378118 | 7.23E-05 | -9.53462  | 116.981  | 1.92E-104 | 2.73E+95   | 0.93504  | 0.998648 |
| Operations and Procedures | Photocoagulation of retina for detachment                         | T | 379101 | 972    | 378129 | 2.66     | 0.980152  | 1.00494  | 0.372     | 19.1       | 0.239396 | 0.998648 |
| Operations and Procedures | Destruction of lesion of retina                                   | T | 379101 | 2270   | 376831 | 1.13     | 0.122189  | 1.00473  | 0.158     | 8.1        | 0.903205 | 0.998648 |
| Operations and Procedures | Fixation of retina                                                | T | 379101 | 1034   | 378067 | 5.84E-05 |           |          |           |            |          |          |

|                           |                                                              |   |        |       |        |          |           |          |           |           |          |          |
|---------------------------|--------------------------------------------------------------|---|--------|-------|--------|----------|-----------|----------|-----------|-----------|----------|----------|
| Operations and Procedures | Other operations on lung                                     | T | 379101 | 801   | 378300 | 8.96E-05 | -9.32049  | 118.44   | 1.36E-105 | 5.89E+96  | 0.937276 | 0.998648 |
| Operations and Procedures | Diagnostic endoscopic examination of mediastinum             | T | 379101 | 587   | 378514 | 4.63E-05 | -9.97982  | 195.222  | 3.09E-171 | 6.95E+161 | 0.95923  | 0.998648 |
| Operations and Procedures | Extripation of lesion of lip                                 | T | 379101 | 1563  | 377538 | 1.83     | 0.602413  | 1.00421  | 0.255     | 13.1      | 0.548583 | 0.998648 |
| Operations and Procedures | Other repair of lip                                          | T | 379101 | 211   | 378890 | 0.00012  | -9.02439  | 198.589  | 1.09E-173 | 1.33E+165 | 0.963755 | 0.998648 |
| Operations and Procedures | Other operations on lip                                      | T | 379101 | 464   | 378637 | 5.52E-05 | -9.80545  | 198.808  | 3.26E-174 | 9.34E+164 | 0.960663 | 0.998648 |
| Operations and Procedures | Surgical removal of tooth                                    | T | 379101 | 5408  | 373693 | 0.485    | -0.722725 | 1.00374  | 0.0679    | 3.47      | 0.471506 | 0.998648 |
| Operations and Procedures | Simple extraction of tooth                                   | T | 379101 | 2335  | 376766 | 7.90E-05 | -9.44656  | 73.4007  | 2.62E-67  | 2.38E+58  | 0.897596 | 0.998648 |
| Operations and Procedures | Preprosthetic oral surgery                                   | T | 379101 | 274   | 378827 | 9.75E-05 | -9.23565  | 198.494  | 1.07E-173 | 8.92E+164 | 0.962889 | 0.998648 |
| Operations and Procedures | Surgery on apex of tooth                                     | T | 379101 | 1147  | 377954 | 6.38E-05 | -9.65988  | 120.597  | 1.41E-107 | 2.88E+98  | 0.936157 | 0.998648 |
| Operations and Procedures | Other operations on tooth                                    | T | 379101 | 286   | 378815 | 8.95E-05 | -9.32172  | 198.89   | 4.50E-174 | 1.78E+165 | 0.962618 | 0.998648 |
| Operations and Procedures | Extripation of lesion of tongue                              | T | 379101 | 690   | 378411 | 0.000101 | -9.20507  | 120.905  | 1.22E-107 | 8.29E+98  | 0.939312 | 0.998648 |
| Operations and Procedures | Incision of tongue                                           | T | 379101 | 994   | 378107 | 6.86E-05 | -9.58722  | 120.84   | 9.45E-108 | 4.98E+98  | 0.936763 | 0.998648 |
| Operations and Procedures | Extripation of lesion of palate                              | T | 379101 | 297   | 378804 | 8.87E-05 | -9.33053  | 198.68   | 6.73E-174 | 1.17E+165 | 0.962543 | 0.998648 |
| Operations and Procedures | Other operations on palate                                   | T | 379101 | 1051  | 378050 | 6.48E-05 | -9.64354  | 118.999  | 3.30E-106 | 1.28E+97  | 0.935411 | 0.998648 |
| Operations and Procedures | Excision of tonsil                                           | T | 379101 | 1168  | 377933 | 6.35E-05 | -9.66455  | 118.605  | 6.98E-106 | 5.77E+96  | 0.935056 | 0.998648 |
| Operations and Procedures | Other operations on tonsil                                   | T | 379101 | 503   | 378598 | 4.95E-05 | -9.91365  | 198.619  | 4.23E-174 | 5.79E+164 | 0.960192 | 0.998648 |
| Operations and Procedures | Extripation of lesion of other part of mouth                 | T | 379101 | 688   | 378413 | 0.000105 | -9.16329  | 120.515  | 2.73E-107 | 4.03E+98  | 0.939391 | 0.998648 |
| Operations and Procedures | Other operations on mouth                                    | T | 379101 | 1260  | 377841 | 5.72E-05 | -9.76881  | 120.218  | 2.67E-107 | 1.23E+98  | 0.935236 | 0.998648 |
| Operations and Procedures | Excision of salivary gland                                   | T | 379101 | 935   | 378166 | 7.17E-05 | -9.54241  | 120.917  | 8.49E-108 | 6.06E+98  | 0.937099 | 0.998648 |
| Operations and Procedures | Excision of oesophagus and stomach                           | T | 379101 | 219   | 378882 | 0.00012  | -9.02913  | 190.448  | 9.25E-167 | 1.55E+158 | 0.962187 | 0.998648 |
| Operations and Procedures | Other therapeutic operations on oesophagus                   | T | 379101 | 331   | 378770 | 7.58E-05 | -9.48714  | 194.571  | 1.81E-170 | 3.18E+161 | 0.961111 | 0.998648 |
| Operations and Procedures | Diagnostic fiberoptic endoscopic examination of oesophagus   | T | 379101 | 1468  | 377633 | 4.61E-05 | -9.98492  | 120.287  | 1.88E-107 | 1.13E+98  | 0.933844 | 0.998648 |
| Operations and Procedures | Other operations on oesophagus                               | T | 379101 | 1839  | 377262 | 1.55     | 0.437119  | 1.00409  | 0.216     | 11.1      | 0.663316 | 0.998648 |
| Operations and Procedures | Repair of diaphragmatic hernia                               | T | 379101 | 276   | 378825 | 9.06E-05 | -9.30889  | 198.656  | 7.21E-174 | 1.14E+165 | 0.962625 | 0.998648 |
| Operations and Procedures | Antireflux operations                                        | T | 379101 | 820   | 378281 | 8.29E-05 | -9.39749  | 121.062  | 7.39E-108 | 9.31E+98  | 0.938126 | 0.998648 |
| Operations and Procedures | Other connection of stomach to jejunum                       | T | 379101 | 256   | 378845 | 0.000106 | -9.15058  | 197.751  | 4.98E-173 | 2.26E+164 | 0.963093 | 0.998648 |
| Operations and Procedures | Artificial opening into stomach                              | T | 379101 | 356   | 378745 | 7.06E-05 | -9.55835  | 196.041  | 9.45E-172 | 5.28E+162 | 0.961113 | 0.998648 |
| Operations and Procedures | Extripation of lesion of upper gastrointestinal tract        | T | 379101 | 1015  | 378086 | 2.67     | 0.98182   | 1.00565  | 0.372     | 19.2      | 0.328915 | 0.998648 |
| Operations and Procedures | Therapeutic fiberoptic gastrointestinal tract                | T | 379101 | 1244  | 377857 | 5.49E-05 | -9.81003  | 119.568  | 9.15E-107 | 3.30E+97  | 0.93461  | 0.998648 |
| Operations and Procedures | Examination of upper gastrointestinal tract                  | T | 379101 | 65264 | 313837 | 0.91     | -0.093923 | 0.233427 | 0.576     | 1.44      | 0.687414 | 0.998648 |
| Operations and Procedures | Intubation of stomach                                        | T | 379101 | 329   | 378772 | 8.37E-05 | -9.38787  | 194.59   | 1.93E-170 | 3.64E+161 | 0.961522 | 0.998648 |
| Operations and Procedures | Artificial opening into jejunum                              | T | 379101 | 294   | 378807 | 8.57E-05 | -9.36458  | 194.078  | 5.38E-170 | 1.37E+161 | 0.961516 | 0.998648 |
| Operations and Procedures | Excision of ileum                                            | T | 379101 | 732   | 378369 | 3.77     | 1.32688   | 1.00481  | 0.526     | 27        | 0.186659 | 0.998648 |
| Operations and Procedures | Creation of artificial opening into ileum                    | T | 379101 | 1023  | 378078 | 2.57     | 0.944013  | 1.00484  | 0.359     | 18.4      | 0.347493 | 0.998648 |
| Operations and Procedures | Attention to artificial opening into ileum                   | T | 379101 | 998   | 378103 | 2.61     | 0.958374  | 1.00478  | 0.364     | 18.7      | 0.340178 | 0.998648 |
| Operations and Procedures | Emergency excision of appendix                               | T | 379101 | 2570  | 376531 | 7.00E-05 | -9.56688  | 73.3144  | 2.75E-67  | 1.78E+58  | 0.896178 | 0.998648 |
| Operations and Procedures | Total excision of colon and rectum                           | T | 379101 | 212   | 378889 | 0.00012  | -9.03085  | 197.78   | 5.30E-173 | 2.70E+164 | 0.96358  | 0.998648 |
| Operations and Procedures | Extended excision of right hemicolon                         | T | 379101 | 250   | 378851 | 0.000101 | -9.19899  | 194.321  | 3.94E-170 | 2.60E+161 | 0.962243 | 0.998648 |
| Operations and Procedures | Other excision of right hemicolon                            | T | 379101 | 1421  | 377680 | 4.85E-05 | -9.93416  | 119.333  | 1.28E-106 | 1.84E+97  | 0.933655 | 0.998648 |
| Operations and Procedures | Excision of left hemicolon                                   | T | 379101 | 330   | 378771 | 8.21E-05 | -9.40756  | 193.43   | 1.83E-169 | 3.68E+160 | 0.96121  | 0.998648 |
| Operations and Procedures | Other excision of colon                                      | T | 379101 | 242   | 378859 | 0.000103 | -9.18372  | 197.606  | 6.40E-173 | 1.65E+164 | 0.962932 | 0.998648 |
| Operations and Procedures | Other exteriorisation of colon                               | T | 379101 | 934   | 378167 | 2.91     | 1.0672    | 1.00498  | 0.406     | 20.8      | 0.288272 | 0.998648 |
| Operations and Procedures | Endoscopic extripation of lesion of colon                    | T | 379101 | 14469 | 364632 | 1.33     | 0.283029  | 0.399943 | 0.617     | 2.86      | 0.469088 | 0.998648 |
| Operations and Procedures | Diagnostic endoscopic examination of colon                   | T | 379101 | 48889 | 330212 | 0.881    | -0.127092 | 0.266608 | 0.522     | 1.49      | 0.633575 | 0.998648 |
| Operations and Procedures | Endoscopic of lower bowel                                    | T | 379101 | 3536  | 375565 | 5.19E-05 | -9.86578  | 72.359   | 1.32E-66  | 2.04E+57  | 0.891549 | 0.998648 |
| Operations and Procedures | Examination of sigmoid colon                                 | T | 379101 | 2690  | 376411 | 6.93E-05 | -9.57668  | 73.1253  | 3.94E-67  | 1.22E+58  | 0.895805 | 0.998648 |
| Operations and Procedures | Excision of rectum                                           | T | 379101 | 2290  | 376811 | 8.13E-05 | -9.41722  | 72.1698  | 3.01E-66  | 2.20E+57  | 0.896181 | 0.998648 |
| Operations and Procedures | Fixation of rectum for prolapse                              | T | 379101 | 293   | 378808 | 9.67E-05 | -9.24348  | 187.941  | 1.02E-164 | 9.21E+155 | 0.960774 | 0.998648 |
| Operations and Procedures | Other operations on rectum through anus                      | T | 379101 | 648   | 378453 | 0.000102 | -9.18831  | 119.873  | 9.37E-107 | 1.12E+98  | 0.938902 | 0.998648 |
| Operations and Procedures | Perineal operations for prolapse of rectum                   | T | 379101 | 257   | 378844 | 0.000106 | -9.15606  | 195.907  | 1.84E-171 | 6.07E+162 | 0.962723 | 0.998648 |
| Operations and Procedures | Manipulation of rectum                                       | T | 379101 | 1760  | 377341 | 3.84E-05 | -10.1665  | 120.949  | 4.27E-108 | 3.46E+98  | 0.933012 | 0.998648 |
| Operations and Procedures | Other operations on rectum                                   | T | 379101 | 894   | 378207 | 8.86E-05 | -9.3314   | 118.813  | 6.48E-106 | 1.21E+97  | 0.9374   | 0.998648 |
| Operations and Procedures | Excision of lesion of anus                                   | T | 379101 | 2708  | 376393 | 1.99     | 0.688376  | 0.712438 | 0.493     | 8.04      | 0.333931 | 0.998648 |
| Operations and Procedures | Destruction of haemorrhoid                                   | T | 379101 | 5384  | 373717 | 3.48E-05 | -10.2659  | 73.2182  | 1.65E-67  | 7.35E+57  | 0.888495 | 0.998648 |
| Operations and Procedures | Other operations on haemorrhoid                              | T | 379101 | 276   | 378825 | 8.47E-05 | -9.37609  | 197.718  | 4.24E-173 | 1.69E+164 | 0.962177 | 0.998648 |
| Operations and Procedures | Dilation of anal sphincter                                   | T | 379101 | 444   | 378657 | 6.09E-05 | -9.70622  | 198.801  | 3.65E-174 | 1.02E+165 | 0.96106  | 0.998648 |
| Operations and Procedures | Other operations on perianal region                          | T | 379101 | 1153  | 377948 | 5.77E-05 | -9.75973  | 119.776  | 6.40E-107 | 5.21E+97  | 0.935058 | 0.998648 |
| Operations and Procedures | Other operations on anus                                     | T | 379101 | 1643  | 377458 | 4.09E-05 | -10.1048  | 121.146  | 3.09E-108 | 5.41E+98  | 0.933525 | 0.998648 |
| Operations and Procedures | Drainage through perineal region                             | T | 379101 | 1052  | 378049 | 6.53E-05 | -9.63716  | 119.268  | 1.96E-106 | 2.18E+97  | 0.935599 | 0.998648 |
| Operations and Procedures | Excision of pilonidal sinus                                  | T | 379101 | 253   | 378848 | 0.000105 | -9.15736  | 191.993  | 3.94E-168 | 2.82E+159 | 0.961958 | 0.998648 |
| Operations and Procedures | Other operations on pilonidal sinus                          | T | 379101 | 206   | 378895 | 5.18E-05 | -9.86828  | 314.749  | 6.23E-273 | 4.31E+263 | 0.974988 | 0.998648 |
| Operations and Procedures | Other operations on bowel                                    | T | 379101 | 379   | 378722 | 7.29E-05 | -9.52703  | 197.511  | 5.47E-173 | 9.71E+163 | 0.961529 | 0.998648 |
| Operations and Procedures | Other puncture of liver                                      | T | 379101 | 403   | 378698 | 6.21E-05 | -9.68716  | 199.223  | 1.63E-174 | 2.37E+165 | 0.961218 | 0.998648 |
| Operations and Procedures | Other open operations on bile duct                           | T | 379101 | 1260  | 377841 | 2.3      | 0.832438  | 1.00485  | 0.321     | 16.5      | 0.407432 | 0.998648 |
| Operations and Procedures | Endoscopic incision of sphincter of Oddi                     | T | 379101 | 1801  | 377300 | 3.97E-05 | -10.1344  | 119.344  | 1.03E-106 | 1.54E+97  | 0.932326 | 0.998648 |
| Operations and Procedures | Endoscopic retrograde placement of prosthesis in bile duct   | T | 379101 | 560   | 378541 | 4.64E-05 | -9.97721  | 195.611  | 1.44E-171 | 1.49E+162 | 0.959321 | 0.998648 |
| Operations and Procedures | Other therapeutic operations on bile duct                    | T | 379101 | 284   | 378817 | 9.28E-05 | -9.28532  | 196.342  | 6.98E-172 | 1.25E+163 | 0.962281 | 0.998648 |
| Operations and Procedures | Examination of bile duct and pancreatic duct                 | T | 379101 | 2192  | 376909 | 8.88E-05 | -9.32955  | 72.433   | 1.96E-66  | 4.02E+57  | 0.897514 | 0.998648 |
| Operations and Procedures | Diagnostic endoscopic retrograde examination of bile duct    | T | 379101 | 309   | 378792 | 8.61E-05 | -9.35971  | 196.801  | 2.60E-172 | 2.85E+163 | 0.962067 | 0.998648 |
| Operations and Procedures | Diagnostic retrograde exam pancreatic duct                   | T | 379101 | 208   | 378893 | 0.000126 | -9.97881  | 196.16   | 1.34E-171 | 1.19E+163 | 0.963491 | 0.998648 |
| Operations and Procedures | Endoscopic ultrasound examination of bile duct               | T | 379101 | 228   | 378873 | 0.000117 | -9.05018  | 197.201  | 1.62E-172 | 8.52E+163 | 0.963395 | 0.998648 |
| Operations and Procedures | Total excision of spleen                                     | T | 379101 | 281   | 378820 | 8.56E-05 | -9.36529  | 198.431  | 1.06E-173 | 6.93E+164 | 0.962357 | 0.998648 |
| Operations and Procedures | Plastic repair of mitral valve                               | T | 379101 | 528   | 378573 | 4.87E-05 | -9.92975  | 192.812  | 3.65E-169 | 6.49E+159 | 0.958927 | 0.998648 |
| Operations and Procedures | Plastic repair of aortic valve                               | T | 379101 | 1074  | 378027 | 2.44     | 0.891593  | 1.00697  | 0.339     | 17.6      | 0.375931 | 0.998648 |
| Operations and Procedures | Other open operations on valve of heart                      | T | 379101 | 301   | 378800 | 8.49E-05 | -9.37432  | 192.038  | 2.90E-168 | 2.48E+159 | 0.961067 | 0.998648 |
| Operations and Procedures | Saphenous vein graft replacement of coronary artery          | T | 379101 | 3223  | 375878 | 6.30E-05 | -9.67267  | 67.5264  | 2.09E-62  | 1.90E+53  | 0.886098 | 0.998648 |
| Operations and Procedures | Other autograft replacement of coronary artery               | T | 379101 | 496   | 378605 | 5.36E-05 | -9.83429  | 184.318  | 6.83E-162 | 4.02E+152 | 0.957449 | 0.998648 |
| Operations and Procedures | Connection of thoracic artery to coronary artery             | T | 379101 | 3408  | 375693 | 5.88E-05 | -9.74055  | 67.5104  | 2.01E-62  | 1.72E+53  | 0.885278 | 0.998648 |
| Operations and Procedures | Transluminal balloon angioplasty of coronary artery          | T | 379101 | 2913  | 376188 | 6.79E-05 | -9.5981   | 69.0828  | 1.06E-63  | 4.33E+54  | 0.889501 | 0.998648 |
| Operations and Procedures | Other therapeutic transluminal operations on coronary artery | T | 379101 | 858   | 378243 | 7.77E-05 | -9.46211  | 114.536  | 2.49E-102 | 2.43E+93  | 0.93416  | 0.998648 |
| Operations and Procedures | Diagnostic transluminal operations on coronary artery        | T | 379101 | 808   | 378293 | 8.76E-05 | -9.34329  | 117.315  | 1.21E-104 | 6.35E+95  | 0.936521 | 0.998648 |
| Operations and Procedures | Transluminal heart assist operations                         | T | 379101 | 275   | 378826 | 9.65E-05 | -9.24635  | 190.199  | 1.21E-166 | 7.67E+157 | 0.961227 | 0.998648 |
| Operations and Procedures | Other therapeutic transluminal operations on heart           | T | 379101 | 1372  | 377729 | 1.89     | 0.636257  | 1.00431  | 0.264     | 13.5      | 0.526388 | 0.998648 |
| Operations and Procedures | Diagnostic transluminal operations on heart                  | T | 379101 | 1107  | 377994 | 5.94E-   |           |          |           |           |          |          |

|                           |                                                          |   |        |       |        |          |           |          |           |           |          |          |
|---------------------------|----------------------------------------------------------|---|--------|-------|--------|----------|-----------|----------|-----------|-----------|----------|----------|
| Operations and Procedures | Other therapeutic transluminal operations on vein        | T | 379101 | 1371  | 377730 | 1.83     | 0.604975  | 1.00429  | 0.256     | 13.1      | 0.546914 | 0.998648 |
| Operations and Procedures | Transplantation of kidney                                | T | 379101 | 266   | 378835 | 9.08E-05 | -9.30729  | 197.834  | 3.62E-173 | 2.28E+164 | 0.962477 | 0.998648 |
| Operations and Procedures | Total excision of kidney                                 | T | 379101 | 1063  | 378038 | 6.32E-05 | -9.69662  | 119.635  | 9.23E-107 | 4.32E+97  | 0.933558 | 0.998648 |
| Operations and Procedures | Therapeutic endoscopic operations on calculus of kidney  | T | 379101 | 417   | 378684 | 5.95E-05 | -9.72893  | 196.641  | 2.46E-172 | 1.44E+163 | 0.96054  | 0.998648 |
| Operations and Procedures | Percutaneous puncture of kidney                          | T | 379101 | 1437  | 377664 | 4.63E-05 | -9.97998  | 120.048  | 3.01E-107 | 7.12E+97  | 0.933746 | 0.998648 |
| Operations and Procedures | Extracorporeal fragmentation of calculus of kidney       | T | 379101 | 1421  | 377680 | 1.78     | 0.576125  | 1.00485  | 0.248     | 12.8      | 0.566413 | 0.998648 |
| Operations and Procedures | Other operations on kidney                               | T | 379101 | 281   | 378820 | 9.18E-05 | -9.29576  | 197.132  | 1.45E-172 | 5.82E+163 | 0.96239  | 0.998648 |
| Operations and Procedures | Urinary diversion                                        | T | 379101 | 327   | 378774 | 7.83E-05 | -9.4553   | 193.641  | 1.16E-169 | 5.30E+160 | 0.961056 | 0.998648 |
| Operations and Procedures | Therapeutic ureteroscopic operations on ureter           | T | 379101 | 1338  | 377763 | 5.01E-05 | -9.90126  | 119.369  | 1.23E-106 | 2.04E+97  | 0.933894 | 0.998648 |
| Operations and Procedures | Other endoscopic removal of calculus from ureter         | T | 379101 | 242   | 378859 | 0.000101 | -9.19546  | 196.735  | 3.49E-172 | 2.96E+163 | 0.96272  | 0.998648 |
| Operations and Procedures | Other therapeutic endoscopic operations on ureter        | T | 379101 | 1932  | 377169 | 9.27E-05 | -9.28645  | 72.9141  | 7.97E-67  | 1.08E+58  | 0.988654 | 0.998648 |
| Operations and Procedures | Diagnostic endoscopic examination of ureter              | T | 379101 | 1627  | 377474 | 1.61     | 0.478645  | 1.00441  | 0.225     | 11.6      | 0.633689 | 0.998648 |
| Operations and Procedures | Extracorporeal fragmentation of calculus of ureter       | T | 379101 | 563   | 378538 | 4.20E-05 | -10.0781  | 193.821  | 4.36E-170 | 4.04E+160 | 0.958531 | 0.998648 |
| Operations and Procedures | Total excision of bladder                                | T | 379101 | 315   | 378786 | 8.14E-05 | -9.41617  | 190.968  | 2.27E-167 | 2.92E+158 | 0.960674 | 0.998648 |
| Operations and Procedures | Other repair of bladder                                  | T | 379101 | 216   | 378885 | 0.000123 | -9.00324  | 198.186  | 2.46E-173 | 6.16E+164 | 0.963766 | 0.998648 |
| Operations and Procedures | Endoscopic extirpation of lesion of bladder              | T | 379101 | 2389  | 376712 | 8.09E-05 | -9.42286  | 70.1885  | 1.45E-64  | 4.50E+55  | 0.893204 | 0.998648 |
| Operations and Procedures | Endoscopic operations to increase capacity of bladder    | T | 379101 | 1067  | 378034 | 7.15E-05 | -9.54628  | 118.755  | 5.86E-106 | 8.72E+96  | 0.93593  | 0.998648 |
| Operations and Procedures | Other therapeutic endoscopic operations on bladder       | T | 379101 | 557   | 378544 | 4.57E-05 | -9.99407  | 192.51   | 6.19E-169 | 3.37E+159 | 0.958597 | 0.998648 |
| Operations and Procedures | Diagnostic endoscopic examination of bladder             | T | 379101 | 30109 | 348992 | 1.06     | 0.059458  | 0.304113 | 0.585     | 1.93      | 0.844993 | 0.998648 |
| Operations and Procedures | Other operations on bladder                              | T | 379101 | 1638  | 377463 | 1.6      | 0.468659  | 1.00512  | 0.223     | 11.5      | 0.64102  | 0.998648 |
| Operations and Procedures | Abdominal operations to support outlet of female bladder | T | 379101 | 1021  | 378080 | 8.57E-08 | -16.2727  | 3625.47  | 0         | Inf       | 0.996419 | 0.998648 |
| Operations and Procedures | Vaginal operations to support outlet of female bladder   | T | 379101 | 3234  | 375867 | 6.82E-08 | -16.5002  | 2210.83  | 0         | Inf       | 0.994045 | 0.998648 |
| Operations and Procedures | Therapeutic on outlet of female bladder                  | T | 379101 | 299   | 378802 | 0.000112 | -9.09286  | 182.002  | 1.34E-159 | 9.42E+150 | 0.960154 | 0.998648 |
| Operations and Procedures | Open excision of prostate                                | T | 379101 | 2046  | 377055 | 1.14     | 0.132379  | 1.0108   | 0.157     | 8.28      | 0.895803 | 0.998648 |
| Operations and Procedures | Endoscopic resection of outlet of male bladder           | T | 379101 | 3901  | 375200 | 0.634    | -0.456466 | 1.01268  | 0.087     | 4.61      | 0.652169 | 0.998648 |
| Operations and Procedures | Other therapeutic on outlet of male bladder              | T | 379101 | 850   | 378251 | 2.95     | 1.08033   | 1.0102   | 0.407     | 21.3      | 0.284876 | 0.998648 |
| Operations and Procedures | Other operations on outlet of male bladder               | T | 379101 | 6418  | 372683 | 1.56     | 0.445483  | 0.521329 | 0.562     | 4.34      | 0.932821 | 0.998648 |
| Operations and Procedures | Therapeutic endoscopic operations on urethra             | T | 379101 | 2234  | 376867 | 8.13E-05 | -9.41785  | 73.1155  | 4.71E-67  | 1.40E+58  | 0.89751  | 0.998648 |
| Operations and Procedures | Diagnostic endoscopic examination of urethra             | T | 379101 | 369   | 378732 | 6.76E-05 | -9.6026   | 190.288  | 7.13E-167 | 6.40E+157 | 0.959753 | 0.998648 |
| Operations and Procedures | Other operations on urethra                              | T | 379101 | 1489  | 377612 | 4.79E-05 | -9.94562  | 120.029  | 3.24E-107 | 7.10E+97  | 0.933963 | 0.998648 |
| Operations and Procedures | Operations on urethral orifice                           | T | 379101 | 464   | 378637 | 5.35E-05 | -9.83573  | 191.839  | 2.70E-168 | 1.06E+159 | 0.95911  | 0.998648 |
| Operations and Procedures | Other operations on scrotum                              | T | 379101 | 203   | 378898 | 4.36E-08 | -16.9477  | 9907.79  | 0         | Inf       | 0.998635 | 0.998648 |
| Operations and Procedures | Other excision of testis                                 | T | 379101 | 508   | 378593 | 4.89E-08 | -16.8326  | 6003.28  | 0         | Inf       | 0.997763 | 0.998648 |
| Operations and Procedures | Operations on hydrocele sac                              | T | 379101 | 1029  | 378072 | 6.64E-08 | -16.528   | 3643.01  | 0         | Inf       | 0.99638  | 0.998648 |
| Operations and Procedures | Operations on epididymis                                 | T | 379101 | 1069  | 378032 | 2.32     | 0.843436  | 1.00797  | 0.322     | 16.8      | 0.402725 | 0.998648 |
| Operations and Procedures | Excision of vas deferens                                 | T | 379101 | 4286  | 374815 | 1.81     | 0.593321  | 0.606944 | 0.551     | 5.95      | 0.328295 | 0.998648 |
| Operations and Procedures | Extirpation of lesion of penis                           | T | 379101 | 221   | 378880 | 4.10E-08 | -17.0106  | 9928.78  | 0         | Inf       | 0.998633 | 0.998648 |
| Operations and Procedures | Plastic operations on penis                              | T | 379101 | 394   | 378707 | 6.28E-08 | -16.5835  | 6024.54  | 0         | Inf       | 0.997804 | 0.998648 |
| Operations and Procedures | Operations on prepuce                                    | T | 379101 | 2323  | 376778 | 2.87E-08 | -17.3681  | 3651.94  | 0         | Inf       | 0.996205 | 0.998648 |
| Operations and Procedures | Other operations on penis                                | T | 379101 | 452   | 378649 | 5.62E-08 | -16.6945  | 5965.72  | 0         | Inf       | 0.997767 | 0.998648 |
| Operations and Procedures | Other upper digestive tract                              | T | 379101 | 488   | 378613 | 4.87E-05 | -9.92945  | 197.272  | 5.84E-173 | 4.06E+163 | 0.959856 | 0.998648 |
| Operations and Procedures | Branch of external carotid artery                        | T | 379101 | 271   | 378830 | 1.00E-04 | -9.20657  | 190.771  | 4.11E-167 | 2.45E+158 | 0.961509 | 0.998648 |
| Operations and Procedures | Other leg region                                         | T | 379101 | 287   | 378814 | 9.70E-05 | -9.24121  | 194.81   | 1.45E-170 | 6.49E+161 | 0.962165 | 0.998648 |
| Operations and Procedures | Other lymph node                                         | T | 379101 | 2930  | 376171 | 0.962    | -0.038661 | 1.00664  | 0.134     | 6.92      | 0.969205 | 0.998648 |
| Operations and Procedures | Body region                                              | T | 379101 | 6404  | 372697 | 1.66     | 0.506208  | 0.508393 | 0.612     | 4.49      | 0.313935 | 0.998648 |
| Operations and Procedures | Excision of bone                                         | T | 379101 | 3651  | 375450 | 0.717    | -0.332121 | 1.0036   | 0.1       | 5.13      | 0.740697 | 0.998648 |
| Operations and Procedures | Operations on Bartholin gland                            | T | 379101 | 599   | 378502 | 5.13E-08 | -16.7853  | 5974.92  | 0         | Inf       | 0.997759 | 0.998648 |
| Operations and Procedures | Excision of vulva                                        | T | 379101 | 1147  | 377954 | 2.64     | 0.970377  | 1.00797  | 0.366     | 19        | 0.335695 | 0.998648 |
| Operations and Procedures | Other operations on vulva                                | T | 379101 | 1300  | 377801 | 6.62E-08 | -16.5305  | 3636.81  | 0         | Inf       | 0.996373 | 0.998648 |
| Operations and Procedures | Other operations on female perineum                      | T | 379101 | 887   | 378214 | 8.98E-08 | -16.2261  | 3651.73  | 0         | Inf       | 0.996455 | 0.998648 |
| Operations and Procedures | Extirpation of lesion of vagina                          | T | 379101 | 675   | 378426 | 4.42E-08 | -16.9353  | 6018.89  | 0         | Inf       | 0.997755 | 0.998648 |
| Operations and Procedures | Other repair of prolapse of vagina                       | T | 379101 | 7298  | 371803 | 3.02E-08 | -17.3141  | 2175.08  | 0         | Inf       | 0.993649 | 0.998648 |
| Operations and Procedures | Repair of vault of vagina                                | T | 379101 | 1152  | 377949 | 7.65E-08 | -16.3863  | 3589.57  | 0         | Inf       | 0.996358 | 0.998648 |
| Operations and Procedures | Other repair of vagina                                   | T | 379101 | 332   | 378769 | 9.17E-08 | -16.2051  | 6003.23  | 0         | Inf       | 0.997846 | 0.998648 |
| Operations and Procedures | Exploration of vagina                                    | T | 379101 | 1868  | 377233 | 4.42E-08 | -16.9355  | 3624.09  | 0         | Inf       | 0.996271 | 0.998648 |
| Operations and Procedures | Other operations on vagina                               | T | 379101 | 544   | 378557 | 5.46E-08 | -16.7241  | 6015.45  | 0         | Inf       | 0.997782 | 0.998648 |
| Operations and Procedures | Excision of cervix uteri                                 | T | 379101 | 3167  | 375934 | 6.86E-08 | -16.4947  | 2208.72  | 0         | Inf       | 0.994041 | 0.998648 |
| Operations and Procedures | Destruction of lesion of cervix uteri                    | T | 379101 | 2136  | 376965 | 3.93E-08 | -17.0532  | 3628.7   | 0         | Inf       | 0.99625  | 0.998648 |
| Operations and Procedures | Biopsy of cervix uteri                                   | T | 379101 | 1749  | 377352 | 4.65E-08 | -16.8844  | 3629.55  | 0         | Inf       | 0.996288 | 0.998648 |
| Operations and Procedures | Other operations on cervix uteri                         | T | 379101 | 247   | 378854 | 1.31E-07 | -15.8444  | 5991.08  | 0         | Inf       | 0.99789  | 0.998648 |
| Operations and Procedures | Abdominal excision of uterus                             | T | 379101 | 9231  | 369870 | 6.53E-08 | -16.5447  | 1332.72  | 0         | Inf       | 0.990095 | 0.998648 |
| Operations and Procedures | Vaginal excision of uterus                               | T | 379101 | 4716  | 374385 | 4.59E-08 | -16.8961  | 2201.81  | 0         | Inf       | 0.993877 | 0.998648 |
| Operations and Procedures | Other open operations on uterus                          | T | 379101 | 285   | 378816 | 1.16E-07 | -15.9722  | 5897.56  | 0         | Inf       | 0.997839 | 0.998648 |
| Operations and Procedures | Curettage of uterus                                      | T | 379101 | 6842  | 372259 | 1.4      | 0.339831  | 0.591213 | 0.44      | 4.48      | 0.566022 | 0.998648 |
| Operations and Procedures | Other evacuation of contents of uterus                   | T | 379101 | 2583  | 376518 | 5.80E-05 | -9.75549  | 102.326  | 4.59E-92  | 7.33E+82  | 0.924047 | 0.998648 |
| Operations and Procedures | Intrauterine contraceptive device                        | T | 379101 | 5122  | 373979 | 1.24     | 0.215659  | 0.722507 | 0.301     | 5.11      | 0.765331 | 0.998648 |
| Operations and Procedures | Introduction of abortifacient into uterine cavity        | T | 379101 | 623   | 378478 | 9.76E-08 | -16.142   | 5461.54  | 0         | Inf       | 0.997642 | 0.998648 |
| Operations and Procedures | Other vaginal operations on uterus                       | T | 379101 | 1552  | 377549 | 1.9      | 0.63972   | 1.01106  | 0.261     | 13.8      | 0.526916 | 0.998648 |
| Operations and Procedures | Therapeutic endoscopic operations on uterus              | T | 379101 | 6827  | 372274 | 1.28     | 0.24871   | 0.59037  | 0.403     | 4.08      | 0.673552 | 0.998648 |
| Operations and Procedures | Diagnostic endoscopic examination of uterus              | T | 379101 | 20331 | 358770 | 0.998    | -0.001677 | 0.398319 | 0.457     | 2.18      | 0.996641 | 0.998648 |
| Operations and Procedures | Other operations on uterus                               | T | 379101 | 1103  | 377998 | 2.51     | 0.919488  | 1.00851  | 0.347     | 18.1      | 0.361912 | 0.998648 |
| Operations and Procedures | Bilateral excision of adnexa of uterus                   | T | 379101 | 8743  | 370358 | 6.75E-08 | -16.5112  | 1334.29  | 0         | Inf       | 0.990127 | 0.998648 |
| Operations and Procedures | Unilateral excision of adnexa of uterus                  | T | 379101 | 1862  | 377239 | 4.66E-08 | -16.8808  | 3606.22  | 0         | Inf       | 0.996265 | 0.998648 |
| Operations and Procedures | Other excision of adnexa of uterus                       | T | 379101 | 224   | 378877 | 4.82E-08 | -16.8481  | 9818.83  | 0         | Inf       | 0.998631 | 0.998648 |
| Operations and Procedures | Endoscopic bilateral occlusion of fallopian tubes        | T | 379101 | 2687  | 376414 | 4.57E-08 | -16.9003  | 3469.03  | 0         | Inf       | 0.996113 | 0.998648 |
| Operations and Procedures | Diagnostic endoscopic examination of fallopian tube      | T | 379101 | 293   | 378808 | 6.87E-08 | -16.4928  | 9376.31  | 0         | Inf       | 0.998597 | 0.998648 |
| Operations and Procedures | Partial excision of ovary                                | T | 379101 | 433   | 378668 | 8.76E-08 | -16.2502  | 5877.98  | 0         | Inf       | 0.997794 | 0.998648 |
| Operations and Procedures | Therapeutic endoscopic operations on ovary               | T | 379101 | 717   | 378384 | 4.85E-08 | -16.8427  | 5838.83  | 0         | Inf       | 0.997698 | 0.998648 |
| Operations and Procedures | Other examination of female genital tract                | T | 379101 | 3998  | 375103 | 1.52     | 0.41764   | 0.71785  | 0.372     | 6.2       | 0.560706 | 0.998648 |
| Operations and Procedures | Other operations on amniotic cavity                      | T | 379101 | 308   | 378793 | 5.06E-08 | -16.7997  | 9097.69  | 0         | Inf       | 0.998527 | 0.998648 |
| Operations and Procedures | Surgical induction of labour                             | T | 379101 | 2296  | 376805 | 8.05E-08 | -16.3347  | 3184.06  | 0         | Inf       | 0.995907 | 0.998648 |
| Operations and Procedures | Other induction of labour                                | T | 379101 | 2732  | 376369 | 6.21E-08 | -16.5944  | 3188.66  | 0         | Inf       | 0.995848 | 0.998648 |
| Operations and Procedures | Elective caesarean delivery                              | T | 379101 | 1697  | 377404 | 9.19E-08 | -16.2029  | 3246.12  | 0         | Inf       | 0.996017 | 0.998648 |
| Operations and Procedures | Other caesarean delivery                                 | T | 379101 | 1946  | 377155 | 8.40E-08 | -16.2919  | 3219     | 0         | Inf       | 0.995962 | 0.998648 |
| Operations and Procedures | Forceps cephalic delivery                                | T | 379101 | 705   | 378396 | 8.80E-08 | -16.2463  | 5307.56  | 0         | Inf       | 0.997558 | 0.998648 |
| Operations and Procedures | Vacuum delivery                                          | T | 379101 | 1205  | 377896 | 5.08E-08 | -16.7944  | 5291.17  | 0         | Inf       | 0.997467 | 0.998648 |
| Operations and Procedures | Normal delivery                                          | T | 379101 | 6515  | 372586 | 0.649    | -0.431911 | 1.03481  | 0.0854    | 4.93      | 0.6764   | 0.998648 |
| Operations and Procedures | Other operations to facilitate delivery                  | T | 379101 | 2119  | 376982 | 7.78E-08 | -16.3691  | 3204.11  | 0         | Inf       | 0.995924 | 0.998648 |
| Operations and Procedures | Removal of products of delivered uterus                  | T | 379101 |       |        |          |           |          |           |           |          |          |

|                           |                                                            |   |        |       |        |          |           |          |           |           |          |          |
|---------------------------|------------------------------------------------------------|---|--------|-------|--------|----------|-----------|----------|-----------|-----------|----------|----------|
| Operations and Procedures | Exploration of other skin of head or neck                  | T | 379101 | 445   | 378656 | 5.55E-05 | -9.79989  | 197.176  | 8.02E-173 | 3.83E+163 | 0.96036  | 0.998648 |
| Operations and Procedures | Exploration of other skin of other site                    | T | 379101 | 4464  | 374637 | 1.15     | 0.140371  | 0.712279 | 0.285     | 4.65      | 0.843868 | 0.998648 |
| Operations and Procedures | Other operations on skin                                   | T | 379101 | 1061  | 378040 | 7.20E-05 | -9.53942  | 118.9    | 4.44E-106 | 1.17E+97  | 0.936054 | 0.998648 |
| Operations and Procedures | Other operations on subcutaneous tissue                    | T | 379101 | 494   | 378607 | 5.68E-05 | -9.77547  | 196.548  | 2.82E-172 | 1.15E+163 | 0.960333 | 0.998648 |
| Operations and Procedures | Other operations on nail bed                               | T | 379101 | 686   | 378415 | 9.35E-05 | -9.27768  | 119.953  | 7.32E-107 | 1.19E+98  | 0.93835  | 0.998648 |
| Operations and Procedures | Other operations on nail                                   | T | 379101 | 396   | 378705 | 6.61E-05 | -9.62469  | 198.596  | 5.91E-174 | 7.39E+164 | 0.961347 | 0.998648 |
| Operations and Procedures | Opening of chest                                           | T | 379101 | 257   | 378844 | 0.000104 | -9.17464  | 190.309  | 1.05E-166 | 1.02E+158 | 0.96155  | 0.998648 |
| Operations and Procedures | Primary repair of inguinal hernia                          | T | 379101 | 13724 | 365377 | 1.27     | 0.2403    | 0.398174 | 0.583     | 2.78      | 0.546173 | 0.998648 |
| Operations and Procedures | Repair of recurrent inguinal hernia                        | T | 379101 | 1175  | 377926 | 6.23E-05 | -9.68361  | 111.043  | 1.87E+99  | 2.07E+90  | 0.930508 | 0.998648 |
| Operations and Procedures | Primary repair of femoral hernia                           | T | 379101 | 527   | 378574 | 5.08E-05 | -9.88847  | 196.368  | 3.58E-172 | 7.20E+162 | 0.959838 | 0.998648 |
| Operations and Procedures | Primary repair of umbilical hernia                         | T | 379101 | 3099  | 376002 | 5.63E-05 | -9.78399  | 71.9634  | 3.12E-66  | 1.02E+57  | 0.891855 | 0.998648 |
| Operations and Procedures | Primary repair of incisional hernia                        | T | 379101 | 1622  | 377479 | 4.20E-05 | -10.077   | 120.31   | 1.64E-107 | 1.08E+98  | 0.933248 | 0.998648 |
| Operations and Procedures | Repair of recurrent incisional hernia                      | T | 379101 | 225   | 378876 | 0.000112 | -9.09778  | 197.929  | 3.70E-173 | 3.38E+164 | 0.963338 | 0.998648 |
| Operations and Procedures | Repair of other hernia of abdominal wall                   | T | 379101 | 1344  | 377757 | 4.90E-05 | -9.9233   | 121.07   | 4.30E-108 | 5.59E+98  | 0.934676 | 0.998648 |
| Operations and Procedures | Opening of abdomen                                         | T | 379101 | 940   | 378161 | 7.39E-05 | -9.51264  | 120.734  | 1.25E-107 | 4.36E+98  | 0.9372   | 0.998648 |
| Operations and Procedures | Other operations on anterior abdominal wall                | T | 379101 | 600   | 378501 | 0.000112 | -9.0928   | 121.044  | 1.04E-107 | 1.22E+99  | 0.940119 | 0.998648 |
| Operations and Procedures | Open drainage of peritoneum                                | T | 379101 | 297   | 378804 | 8.54E-05 | -9.36855  | 199.068  | 3.03E-174 | 2.41E+165 | 0.962464 | 0.998648 |
| Operations and Procedures | Operations on omentum                                      | T | 379101 | 1948  | 377153 | 4.22E-05 | -10.0738  | 114.556  | 1.30E-102 | 1.37E+93  | 0.929926 | 0.998648 |
| Operations and Procedures | Other open operations on peritoneum                        | T | 379101 | 2184  | 376917 | 1.26     | 0.232692  | 1.00425  | 0.176     | 9.03      | 0.816766 | 0.998648 |
| Operations and Procedures | Therapeutic endoscopic operations on peritoneum            | T | 379101 | 1599  | 377502 | 4.70E-05 | -9.96576  | 117.985  | 1.74E-105 | 1.27E+96  | 0.932685 | 0.998648 |
| Operations and Procedures | Diagnostic endoscopic examination of peritoneum            | T | 379101 | 4723  | 374378 | 0.058    | -0.418743 | 1.00776  | 0.0913    | 4.74      | 0.677762 | 0.998648 |
| Operations and Procedures | Other drainage of peritoneal cavity                        | T | 379101 | 2011  | 377090 | 1.39     | 0.328408  | 1.00432  | 0.194     | 9.94      | 0.743671 | 0.998648 |
| Operations and Procedures | Excision of other fascia                                   | T | 379101 | 2947  | 376154 | 6.49E-05 | -9.6428   | 70.098   | 1.39E-64  | 3.03E+55  | 0.890587 | 0.998648 |
| Operations and Procedures | Division of fascia                                         | T | 379101 | 394   | 378707 | 6.66E-05 | -9.61678  | 192.229  | 1.57E-168 | 2.83E+159 | 0.9601   | 0.998648 |
| Operations and Procedures | Excision of ganglion                                       | T | 379101 | 2429  | 376672 | 2.34     | 0.85135   | 0.712845 | 0.579     | 9.47      | 0.232361 | 0.998648 |
| Operations and Procedures | Operations on bursa                                        | T | 379101 | 1825  | 377276 | 1.52     | 0.4157    | 1.00405  | 0.212     | 10.8      | 0.678858 | 0.998648 |
| Operations and Procedures | Transposition of tendon                                    | T | 379101 | 795   | 378306 | 8.45E-05 | -9.37919  | 120.989  | 8.68E-108 | 8.21E+98  | 0.938209 | 0.998648 |
| Operations and Procedures | Excision of tendon                                         | T | 379101 | 253   | 378848 | 0.000102 | -9.1932   | 198.422  | 1.28E-173 | 8.08E+164 | 0.963046 | 0.998648 |
| Operations and Procedures | Primary repair of tendon                                   | T | 379101 | 2574  | 376527 | 0.979    | -0.021592 | 1.00453  | 0.137     | 7.01      | 0.982851 | 0.998648 |
| Operations and Procedures | Adjustment to length of tendon                             | T | 379101 | 2142  | 376959 | 8.94E-05 | -9.32242  | 72.4137  | 2.05E-66  | 3.90E+57  | 0.897565 | 0.998648 |
| Operations and Procedures | Other operations on sheath of tendon                       | T | 379101 | 2908  | 376193 | 0.929    | -0.074055 | 1.00415  | 0.13      | 6.65      | 0.94121  | 0.998648 |
| Operations and Procedures | Other operations on tendon                                 | T | 379101 | 780   | 378321 | 3.43     | 1.23139   | 1.00437  | 0.478     | 24.5      | 0.220185 | 0.998648 |
| Operations and Procedures | Excision of muscle                                         | T | 379101 | 476   | 378625 | 5.02E-05 | -9.89952  | 199.436  | 8.66E-175 | 2.91E+165 | 0.960411 | 0.998648 |
| Operations and Procedures | Repair of muscle                                           | T | 379101 | 2257  | 376844 | 8.08E-05 | -9.42338  | 72.8034  | 8.63E-67  | 7.57E+57  | 0.897013 | 0.998648 |
| Operations and Procedures | Biopsy of muscle                                           | T | 379101 | 421   | 378680 | 5.74E-05 | -9.76497  | 199.531  | 8.22E-175 | 4.01E+165 | 0.960967 | 0.998648 |
| Operations and Procedures | Other operations on muscle                                 | T | 379101 | 238   | 378863 | 0.000105 | -9.16094  | 199.388  | 1.99E-174 | 5.55E+165 | 0.963354 | 0.998648 |
| Operations and Procedures | Block dissection of lymph nodes                            | T | 379101 | 5157  | 373944 | 1.1      | 0.093985  | 0.714224 | 0.271     | 4.45      | 0.895308 | 0.998648 |
| Operations and Procedures | Sampling of lymph nodes                                    | T | 379101 | 2952  | 376149 | 1.97     | 0.678013  | 0.717131 | 0.483     | 8.03      | 0.344428 | 0.998648 |
| Operations and Procedures | Excision or biopsy of lymph node                           | T | 379101 | 6160  | 372941 | 0.45     | -0.797556 | 1.00043  | 0.0629    | 3.22      | 0.427112 | 0.998648 |
| Operations and Procedures | Operations on sentinel lymph node                          | T | 379101 | 1143  | 377958 | 2.52     | 0.925338  | 1.00749  | 0.35      | 18.2      | 0.35838  | 0.998648 |
| Operations and Procedures | Other operations on soft tissue                            | T | 379101 | 1277  | 377824 | 2.13     | 0.754358  | 1.00407  | 0.297     | 15.2      | 0.45247  | 0.998648 |
| Operations and Procedures | Diagnostic imaging of central nervous system               | T | 379101 | 13682 | 365419 | 0.763    | -0.270445 | 0.507886 | 0.282     | 2.06      | 0.594386 | 0.998648 |
| Operations and Procedures | Diagnostic imaging of abdomen                              | T | 379101 | 2458  | 376643 | 7.64E-05 | -9.47919  | 72.8811  | 7.01E-67  | 8.33E+57  | 0.896516 | 0.998648 |
| Operations and Procedures | Diagnostic imaging of pelvis                               | T | 379101 | 1273  | 377828 | 2.04     | 0.714192  | 1.00418  | 0.285     | 14.6      | 0.476948 | 0.998648 |
| Operations and Procedures | Diagnostic imaging of heart                                | T | 379101 | 1244  | 377857 | 5.19E-05 | -9.86662  | 119.733  | 6.25E-107 | 4.30E+97  | 0.934324 | 0.998648 |
| Operations and Procedures | Diagnostic imaging of vascular system                      | T | 379101 | 1073  | 378028 | 6.32E-05 | -9.66972  | 120.403  | 2.05E-107 | 1.95E+98  | 0.93599  | 0.998648 |
| Operations and Procedures | Diagnostic imaging of genitourinary system                 | T | 379101 | 293   | 378808 | 9.48E-05 | -9.26356  | 193.57   | 1.61E-169 | 5.58E+160 | 0.961831 | 0.998648 |
| Operations and Procedures | Diagnostic imaging of musculoskeletal system               | T | 379101 | 820   | 378281 | 8.09E-05 | -9.42266  | 120.905  | 9.80E-108 | 6.67E+98  | 0.93788  | 0.998648 |
| Operations and Procedures | Diagnostic imaging of digestive tract                      | T | 379101 | 243   | 378858 | 0.00012  | -9.02635  | 195.271  | 7.28E-171 | 1.99E+162 | 0.963131 | 0.998648 |
| Operations and Procedures | Diagnostic electrocardiography                             | T | 379101 | 998   | 378103 | 2.8      | 1.02868   | 1.00602  | 0.389     | 20.1      | 0.306534 | 0.998648 |
| Operations and Procedures | Neuropsychology tests                                      | T | 379101 | 256   | 378845 | 9.47E-05 | -9.26494  | 198.9    | 4.67E-174 | 1.92E+165 | 0.962847 | 0.998648 |
| Operations and Procedures | Breath tests                                               | T | 379101 | 412   | 378689 | 6.54E-05 | -9.63567  | 198.422  | 8.22E-174 | 5.19E+164 | 0.961269 | 0.998648 |
| Operations and Procedures | Diagnostic endocrinology                                   | T | 379101 | 1212  | 377889 | 5.73E-05 | -9.7675   | 121.094  | 4.79E-108 | 6.84E+98  | 0.935712 | 0.998648 |
| Operations and Procedures | Autonomic cardiovascular testing                           | T | 379101 | 235   | 378866 | 0.000114 | -9.0797   | 196.773  | 3.63E-172 | 3.58E+163 | 0.963196 | 0.998648 |
| Operations and Procedures | Other diagnostic imaging of genitourinary system           | T | 379101 | 209   | 378892 | 0.000113 | -9.08376  | 199.395  | 2.12E-174 | 6.07E+165 | 0.963664 | 0.998648 |
| Operations and Procedures | Rehabilitation for musculoskeletal disorders               | T | 379101 | 364   | 378737 | 6.70E-05 | -9.61131  | 196.148  | 7.27E-172 | 6.17E+162 | 0.960919 | 0.998648 |
| Operations and Procedures | Rehabilitation for neurological disorders                  | T | 379101 | 314   | 378787 | 7.61E-05 | -9.48326  | 199.192  | 2.12E-174 | 2.74E+165 | 0.960208 | 0.998648 |
| Operations and Procedures | Rehabilitation for other disorders                         | T | 379101 | 724   | 378377 | 9.43E-05 | -9.26877  | 118.209  | 2.25E-105 | 3.95E+96  | 0.937502 | 0.998648 |
| Operations and Procedures | Reduction of fracture of other bone of face                | T | 379101 | 686   | 378415 | 0.000102 | -9.18744  | 118.771  | 8.13E-106 | 1.29E+97  | 0.938342 | 0.998648 |
| Operations and Procedures | Fixation of bone of face                                   | T | 379101 | 219   | 378882 | 0.000117 | -0.05392  | 194.236  | 5.38E-170 | 2.54E+161 | 0.962822 | 0.998648 |
| Operations and Procedures | Fixation of mandible                                       | T | 379101 | 258   | 378843 | 9.99E-05 | -9.21179  | 194.397  | 3.35E-170 | 2.97E+161 | 0.962205 | 0.998648 |
| Operations and Procedures | Primary decompression operations on cervical spine         | T | 379101 | 557   | 378544 | 4.22E-05 | -10.072   | 199.077  | 1.47E-174 | 1.21E+165 | 0.95965  | 0.998648 |
| Operations and Procedures | Primary decompression operations on lumbar spine           | T | 379101 | 2461  | 376640 | 1.06     | 0.054543  | 1.0042   | 0.148     | 7.56      | 0.956684 | 0.998648 |
| Operations and Procedures | Primary excision of cervical intervertebral disc           | T | 379101 | 805   | 378296 | 8.13E-05 | -9.41676  | 120.82   | 1.16E-107 | 5.68E+98  | 0.937876 | 0.998648 |
| Operations and Procedures | Primary excision of lumbar intervertebral disc             | T | 379101 | 1796  | 377305 | 3.73E-05 | -10.1958  | 120.879  | 4.76E-108 | 2.93E+98  | 0.932781 | 0.998648 |
| Operations and Procedures | Stabilisation of spine                                     | T | 379101 | 284   | 378817 | 8.21E-05 | -9.40747  | 198.659  | 6.49E-174 | 1.04E+165 | 0.96223  | 0.998648 |
| Operations and Procedures | Instrumental correction of deformity of spine              | T | 379101 | 342   | 378759 | 7.02E-05 | -9.56406  | 198.971  | 3.01E-174 | 1.64E+165 | 0.961662 | 0.998648 |
| Operations and Procedures | Denervation of spinal facet joint of vertebra              | T | 379101 | 675   | 378426 | 5.95E-05 | -9.25175  | 120.685  | 1.79E-107 | 5.14E+98  | 0.938894 | 0.998648 |
| Operations and Procedures | Manipulation of spine                                      | T | 379101 | 218   | 378883 | 0.000116 | -9.06228  | 198.258  | 2.01E-173 | 6.68E+164 | 0.963542 | 0.998648 |
| Operations and Procedures | Other operations on intervertebral disc                    | T | 379101 | 298   | 378803 | 8.51E-05 | -9.37174  | 198.238  | 1.54E-173 | 4.72E+164 | 0.962294 | 0.998648 |
| Operations and Procedures | Other operations on spine                                  | T | 379101 | 4622  | 374479 | 1.18     | 0.163894  | 0.712639 | 0.291     | 4.76      | 0.818106 | 0.998648 |
| Operations and Procedures | Levels of spine                                            | T | 379101 | 6828  | 372273 | 1.17     | 0.152764  | 0.583858 | 0.371     | 3.66      | 0.793595 | 0.998648 |
| Operations and Procedures | Complex reconstruction of forefoot                         | T | 379101 | 800   | 378301 | 9.65E-05 | -9.24595  | 116.793  | 3.70E-104 | 2.52E+95  | 0.936901 | 0.998648 |
| Operations and Procedures | Complex reconstruction of hindfoot                         | T | 379101 | 342   | 378759 | 7.14E-05 | -9.547    | 198.342  | 1.05E-173 | 4.85E+164 | 0.961609 | 0.998648 |
| Operations and Procedures | Total excision of bone                                     | T | 379101 | 1188  | 377913 | 2.31     | 0.835344  | 1.00568  | 0.321     | 16.6      | 0.406187 | 0.998648 |
| Operations and Procedures | Other excision of bone                                     | T | 379101 | 3701  | 375400 | 1.48     | 0.389491  | 0.712642 | 0.365     | 5.97      | 0.584692 | 0.998648 |
| Operations and Procedures | Extirpation of lesion of bone                              | T | 379101 | 466   | 378635 | 5.08E-05 | -9.88837  | 199.364  | 1.01E-174 | 2.56E+165 | 0.960441 | 0.998648 |
| Operations and Procedures | Other periarticular division of bone                       | T | 379101 | 263   | 378838 | 9.99E-05 | -9.21141  | 196.339  | 7.45E-172 | 1.34E+163 | 0.96258  | 0.998648 |
| Operations and Procedures | Diaphyseal division of bone                                | T | 379101 | 396   | 378705 | 7.43E-05 | -9.5077   | 187.449  | 2.05E-164 | 2.70E+155 | 0.959547 | 0.998648 |
| Operations and Procedures | Division of bone of foot                                   | T | 379101 | 4767  | 374334 | 0.605    | -0.503235 | 1.00621  | 0.0841    | 4.34      | 0.616983 | 0.998648 |
| Operations and Procedures | Other division of bone                                     | T | 379101 | 1162  | 377939 | 5.94E-05 | -9.73176  | 119.361  | 1.48E-106 | 2.38E+97  | 0.935019 | 0.998648 |
| Operations and Procedures | Bone and intramedullary fixation                           | T | 379101 | 2523  | 376578 | 7.12E-05 | -9.55028  | 73.4948  | 1.96E-67  | 2.58E+58  | 0.89661  | 0.998648 |
| Operations and Procedures | Bone and extramedullary fixation                           | T | 379101 | 5789  | 373312 | 1.89     | 0.636048  | 0.507655 | 0.698     | 5.11      | 0.210237 | 0.998648 |
| Operations and Procedures | Primary open reduction of intra articular fracture of bone | T | 379101 | 292   | 378809 | 8.71E-05 | -9.34831  | 199.553  | 1.19E-174 | 6.35E+165 | 0.962636 | 0.998648 |
| Operations and Procedures | Closed reduction of fracture of bone and internal fixation | T | 379101 | 2838  | 376263 | 0.954    | -0.047384 | 1.00     |           |           |          |          |

|                           |                                                                  |   |        |       |        |          |           |          |           |           |          |          |
|---------------------------|------------------------------------------------------------------|---|--------|-------|--------|----------|-----------|----------|-----------|-----------|----------|----------|
| Operations and Procedures | Release of contracture of joint                                  | T | 379101 | 1613  | 377488 | 1.68     | 0.515959  | 1.00403  | 0.234     | 12        | 0.607332 | 0.998648 |
| Operations and Procedures | Soft tissue operations on joint of toe                           | T | 379101 | 2721  | 376380 | 7.96E-05 | -9.43885  | 70.0244  | 1.97E-64  | 3.21E+55  | 0.892775 | 0.998648 |
| Operations and Procedures | Other open operations on joint                                   | T | 379101 | 1273  | 377828 | 5.26E-05 | -9.8528   | 120.835  | 7.31E-108 | 3.78E+98  | 0.935013 | 0.998648 |
| Operations and Procedures | Therapeutic endoscopic operations on semilunar cartilage         | T | 379101 | 12492 | 366609 | 1.47     | 0.387607  | 0.388189 | 0.688     | 3.15      | 0.318037 | 0.998648 |
| Operations and Procedures | Therapeutic endoscopic operations on other articular cartilage   | T | 379101 | 3095  | 376006 | 0.798    | -0.225154 | 1.00388  | 0.112     | 5.71      | 0.822536 | 0.998648 |
| Operations and Procedures | Therapeutic endoscopic operations on other joint structure       | T | 379101 | 4753  | 374348 | 1.63     | 0.48922   | 0.583789 | 0.519     | 5.12      | 0.400206 | 0.998648 |
| Operations and Procedures | Therapeutic endoscopic operations on cavity of knee joint        | T | 379101 | 4112  | 374989 | 0.615    | -0.48689  | 1.00366  | 0.0859    | 4.39      | 0.627595 | 0.998648 |
| Operations and Procedures | Therapeutic endoscopic operations on cavity of other joint       | T | 379101 | 583   | 378518 | 0.000113 | -9.09175  | 120.844  | 1.54E-107 | 8.24E+98  | 0.940027 | 0.998648 |
| Operations and Procedures | Diagnostic endoscopic examination of knee joint                  | T | 379101 | 3016  | 376085 | 0.873    | -0.13546  | 1.00368  | 0.122     | 6.24      | 0.89264  | 0.998648 |
| Operations and Procedures | Diagnostic endoscopic examination of other joint                 | T | 379101 | 560   | 378541 | 4.37E-05 | -10.0374  | 199.027  | 1.68E-174 | 1.14E+165 | 0.959778 | 0.998648 |
| Operations and Procedures | Operations on other articular cartilage                          | T | 379101 | 1114  | 377987 | 5.80E-05 | -9.75565  | 120.87   | 7.53E-108 | 4.46E+98  | 0.935671 | 0.998648 |
| Operations and Procedures | Puncture of joint                                                | T | 379101 | 10120 | 368981 | 0.558    | -0.584201 | 0.712233 | 0.138     | 2.25      | 0.41208  | 0.998648 |
| Operations and Procedures | Other manipulation of joint                                      | T | 379101 | 2050  | 377051 | 9.22E-05 | -9.29206  | 73.106   | 5.44E-67  | 1.56E+58  | 0.898858 | 0.998648 |
| Operations and Procedures | Other operations on joint                                        | T | 379101 | 520   | 378581 | 4.78E-05 | -9.94908  | 199.575  | 6.27E-175 | 3.64E+165 | 0.960241 | 0.998648 |
| Operations and Procedures | Hybrid prosthetic replacement of hip joint                       | T | 379101 | 286   | 378815 | 0.00011  | -9.11909  | 191.643  | 8.12E-168 | 1.48E+159 | 0.962048 | 0.998648 |
| Operations and Procedures | Replacement of hip joint                                         | T | 379101 | 1139  | 377962 | 5.87E-05 | -9.74344  | 116.171  | 7.62E-104 | 4.52E+94  | 0.933159 | 0.998648 |
| Operations and Procedures | Continuous Infusion of therapeutic substance                     | T | 379101 | 8393  | 370708 | 0.985    | -0.015346 | 0.58433  | 0.313     | 3.1       | 0.790048 | 0.998648 |
| Operations and Procedures | Injection of therapeutic substance                               | T | 379101 | 1288  | 377813 | 5.71E-05 | -9.77077  | 119.167  | 2.09E-106 | 1.56E+97  | 0.934653 | 0.998648 |
| Operations and Procedures | Injection of radiocontrast material                              | T | 379101 | 1644  | 377457 | 4.15E-05 | -10.0892  | 120.149  | 2.22E-107 | 7.78E+97  | 0.933078 | 0.998648 |
| Operations and Procedures | Other blood transfusion                                          | T | 379101 | 4631  | 374470 | 1.17     | 0.154426  | 0.712759 | 0.289     | 4.72      | 0.828474 | 0.998648 |
| Operations and Procedures | Other intravenous transfusion                                    | T | 379101 | 222   | 378879 | 0.000113 | -9.08951  | 198.902  | 5.54E-174 | 2.30E+165 | 0.963551 | 0.998648 |
| Operations and Procedures | Other intravenous injection                                      | T | 379101 | 5047  | 374054 | 3.61E-05 | -10.2292  | 72.9444  | 2.92E-67  | 4.46E+57  | 0.888477 | 0.998648 |
| Operations and Procedures | Subcutaneous injection                                           | T | 379101 | 2578  | 376523 | 1.05     | 0.046716  | 1.00397  | 0.146     | 7.5       | 0.962887 | 0.998648 |
| Operations and Procedures | Other route of administration of therapeutic substance           | T | 379101 | 241   | 378860 | 0.000123 | -9.0018   | 194.461  | 3.65E-170 | 4.16E+161 | 0.963078 | 0.998648 |
| Operations and Procedures | Compensation for renal failure                                   | T | 379101 | 703   | 378398 | 3.71     | 1.31098   | 1.00538  | 0.517     | 26.6      | 0.192246 | 0.998648 |
| Operations and Procedures | Immobilisation using plaster cast                                | T | 379101 | 694   | 378407 | 0.000102 | -9.19075  | 120.583  | 2.32E-107 | 4.48E+98  | 0.939245 | 0.998648 |
| Operations and Procedures | Other operations on unspecified organ                            | T | 379101 | 2194  | 376907 | 4.36E-05 | -10.0404  | 108.296  | 2.86E-97  | 6.65E+87  | 0.962132 | 0.998648 |
| Operations and Procedures | Radiotherapy delivery                                            | T | 379101 | 2124  | 376977 | 2.27     | 0.818235  | 0.715415 | 0.558     | 9.21      | 0.25274  | 0.998648 |
| Operations and Procedures | Preparation for external beam radiotherapy                       | T | 379101 | 655   | 378446 | 9.98E-05 | -9.21252  | 120      | 7.13E-107 | 1.40E+98  | 0.938806 | 0.998648 |
| Operations and Procedures | Procurement of drugs for chemotherapy for neoplasm in Bands 1 5  | T | 379101 | 5730  | 373371 | 3.06E-05 | -10.3939  | 72.9295  | 2.55E-67  | 3.67E+57  | 0.886669 | 0.998648 |
| Operations and Procedures | Procurement of drugs for chemotherapy for neoplasm in Bands 6 10 | T | 379101 | 4078  | 375023 | 1.25     | 0.224469  | 0.713082 | 0.309     | 5.06      | 0.752923 | 0.998648 |
| Operations and Procedures | Delivery of chemotherapy for neoplasm                            | T | 379101 | 7579  | 371522 | 0.693    | -0.367178 | 0.713045 | 0.171     | 2.8       | 0.606592 | 0.998648 |
| Operations and Procedures | Delivery of oral chemotherapy for neoplasm                       | T | 379101 | 560   | 378541 | 4.48E-05 | -10.014   | 197.459  | 3.72E-173 | 5.39E+163 | 0.959553 | 0.998648 |
| Operations and Procedures | High cost other cardiovascular drugs                             | T | 379101 | 535   | 378566 | 4.77E-05 | -9.94992  | 196.01   | 6.79E-172 | 3.36E+162 | 0.959515 | 0.998648 |
| Operations and Procedures | High cost haematology and nutrition drugs                        | T | 379101 | 606   | 378495 | 0.000112 | -9.09985  | 120.331  | 4.17E-107 | 2.99E+98  | 0.939719 | 0.998648 |
| Operations and Procedures | High cost musculoskeletal drugs                                  | T | 379101 | 570   | 378531 | 4.35E-05 | -10.0435  | 199.133  | 1.36E-174 | 1.39E+165 | 0.959775 | 0.998648 |
| Operations and Procedures | High cost ophthalmology drugs                                    | T | 379101 | 346   | 378755 | 8.46E-05 | -9.37714  | 190.448  | 6.53E-167 | 1.10E+158 | 0.96073  | 0.998648 |
| Operations and Procedures | High cost immunology drugs                                       | T | 379101 | 340   | 378761 | 6.98E-05 | -9.56956  | 197.777  | 3.11E-173 | 1.57E+164 | 0.961409 | 0.998648 |
| Operations and Procedures | Placement of prosthesis in organ NOC                             | T | 379101 | 3165  | 375936 | 0.82     | -0.198485 | 1.00596  | 0.114     | 5.89      | 0.843587 | 0.998648 |
| Operations and Procedures | Attention to prosthesis in organ NOC                             | T | 379101 | 2929  | 376172 | 0.904    | -0.100979 | 1.00396  | 0.126     | 6.47      | 0.919883 | 0.998648 |
| Operations and Procedures | Obliteration of cavity of organ NOC                              | T | 379101 | 637   | 378464 | 0.000104 | -9.1738   | 119.619  | 1.56E-106 | 6.88E+97  | 0.938869 | 0.998648 |
| Operations and Procedures | Laser therapy to organ NOC                                       | T | 379101 | 2987  | 376114 | 1.78     | 0.57789   | 0.713251 | 0.44      | 7.21      | 0.417814 | 0.998648 |
| Operations and Procedures | Other destruction of organ NOC                                   | T | 379101 | 2176  | 376925 | 8.42E-05 | -9.38207  | 73.0689  | 5.34E-67  | 1.33E+58  | 0.897832 | 0.998648 |
| Operations and Procedures | Chemical destruction of lesion of organ NOC                      | T | 379101 | 228   | 378873 | 0.000119 | -9.03969  | 192.069  | 3.82E-168 | 3.69E+159 | 0.962462 | 0.998648 |
| Operations and Procedures | Other destruction of lesion of organ NOC                         | T | 379101 | 2552  | 376549 | 1.02     | 0.017224  | 1.00396  | 0.142     | 7.28      | 0.986312 | 0.998648 |
| Operations and Procedures | Placement of stent in organ NOC                                  | T | 379101 | 1320  | 377781 | 5.10E-05 | -9.88385  | 117.628  | 3.81E-105 | 6.83E+95  | 0.933036 | 0.998648 |
| Operations and Procedures | Attention to stent in organ NOC                                  | T | 379101 | 390   | 378711 | 6.23E-05 | -9.68349  | 197.955  | 1.96E-173 | 1.98E+164 | 0.960985 | 0.998648 |
| Operations and Procedures | Connection of organ NOC                                          | T | 379101 | 354   | 378747 | 7.06E-05 | -9.55861  | 197.464  | 5.81E-173 | 8.58E+163 | 0.961392 | 0.998648 |
| Operations and Procedures | Release of organ NOC                                             | T | 379101 | 896   | 378205 | 3.07     | 1.12086   | 1.00441  | 0.428     | 22        | 0.264451 | 0.998648 |
| Operations and Procedures | Biopsy of organ NOC                                              | T | 379101 | 7160  | 371941 | 0.739    | -0.303132 | 0.713051 | 0.183     | 2.99      | 0.67075  | 0.998648 |
| Operations and Procedures | Cytology of organ NOC                                            | T | 379101 | 2554  | 376547 | 2.21     | 0.791353  | 0.713042 | 0.545     | 8.93      | 0.267074 | 0.998648 |
| Operations and Procedures | Drainage of organ NOC                                            | T | 379101 | 2627  | 376474 | 6.77E-05 | -9.60047  | 73.4522  | 2.03E-67  | 2.26E+58  | 0.89601  | 0.998648 |
| Operations and Procedures | Other repair of organ NOC                                        | T | 379101 | 893   | 378208 | 2.95     | 1.08024   | 1.00433  | 0.411     | 21.1      | 0.282115 | 0.998648 |
| Operations and Procedures | Graft to organ NOC                                               | T | 379101 | 624   | 378477 | 0.000107 | -9.1403   | 121.005  | 1.07E-107 | 1.08E+99  | 0.939788 | 0.998648 |
| Operations and Procedures | Re exploration of organ NOC                                      | T | 379101 | 217   | 378884 | 0.000108 | -9.13138  | 199.089  | 3.68E-174 | 3.18E+165 | 0.963417 | 0.998648 |
| Operations and Procedures | Puncture of organ NOC                                            | T | 379101 | 315   | 378786 | 8.26E-05 | -9.40094  | 198.648  | 6.68E-174 | 1.02E+165 | 0.962254 | 0.998648 |
| Operations and Procedures | Injection of therapeutic substance into organ NOC                | T | 379101 | 608   | 378493 | 0.000118 | -9.04634  | 120.707  | 2.11E-107 | 6.59E+98  | 0.940259 | 0.998648 |
| Operations and Procedures | Dilation of organ NOC                                            | T | 379101 | 512   | 378589 | 4.77E-05 | -9.95115  | 197.954  | 1.50E-173 | 1.51E+164 | 0.959907 | 0.998648 |
| Operations and Procedures | Examination of organ NOC                                         | T | 379101 | 581   | 378520 | 4.25E-05 | -10.0668  | 198.743  | 2.85E-174 | 6.33E+164 | 0.959603 | 0.998648 |
| Operations and Procedures | Open approach to contents of cranium                             | T | 379101 | 800   | 378301 | 8.03E-05 | -9.42931  | 120.995  | 8.16E-108 | 7.91E+98  | 0.937882 | 0.998648 |
| Operations and Procedures | Burrhole approach to contents of cranium                         | T | 379101 | 411   | 378690 | 5.98E-05 | -9.72486  | 197.552  | 4.14E-173 | 8.63E+163 | 0.960739 | 0.998648 |
| Operations and Procedures | Approach to spine through back                                   | T | 379101 | 309   | 378792 | 7.37E-05 | -9.51558  | 198.285  | 1.21E-173 | 4.48E+164 | 0.961725 | 0.998648 |
| Operations and Procedures | Approach through thoracic cavity                                 | T | 379101 | 602   | 378499 | 4.07E-05 | -10.1101  | 195.137  | 3.20E-171 | 5.17E+161 | 0.95868  | 0.998648 |
| Operations and Procedures | Approach through abdominal cavity                                | T | 379101 | 6488  | 372613 | 1.75     | 0.557048  | 0.508635 | 0.644     | 4.73      | 0.273437 | 0.998648 |
| Operations and Procedures | Opening into gastrointestinal tract                              | T | 379101 | 207   | 378894 | 0.000126 | -8.97718  | 196.854  | 3.43E-172 | 4.64E+163 | 0.963626 | 0.998648 |
| Operations and Procedures | Approach to organ through other opening                          | T | 379101 | 1441  | 377660 | 4.69E-05 | -9.96745  | 120.735  | 7.93E-108 | 2.77E+98  | 0.934204 | 0.998648 |
| Operations and Procedures | Approach to organ under image control                            | T | 379101 | 45067 | 334034 | 1.19     | 0.173253  | 0.244236 | 0.737     | 1.92      | 0.478098 | 0.998648 |
| Operations and Procedures | Harvest of skin for graft                                        | T | 379101 | 2280  | 376821 | 1.13     | 0.125208  | 1.00481  | 0.158     | 8.12      | 0.900833 | 0.998648 |
| Operations and Procedures | Harvest of flap of skin and fascia                               | T | 379101 | 546   | 378555 | 4.57E-05 | -9.99248  | 199.548  | 6.33E-175 | 3.30E+165 | 0.960602 | 0.998648 |
| Operations and Procedures | Harvest of tendon                                                | T | 379101 | 532   | 378569 | 4.66E-05 | -9.97304  | 198.152  | 9.96E-174 | 2.18E+164 | 0.959859 | 0.998648 |
| Operations and Procedures | Harvest of bone                                                  | T | 379101 | 1453  | 377648 | 1.84     | 0.611691  | 1.00393  | 0.258     | 13.2      | 0.542327 | 0.998648 |
| Operations and Procedures | Harvest of other tissue                                          | T | 379101 | 784   | 378317 | 8.47E-05 | -9.37604  | 120.914  | 1.01E-107 | 7.11E+98  | 0.938191 | 0.998648 |
| Operations and Procedures | Early operations NOC                                             | T | 379101 | 2989  | 376112 | 6.09E-05 | -9.70631  | 72.6669  | 8.50E-67  | 4.36E+57  | 0.89374  | 0.998648 |
| Operations and Procedures | Late operations NOC                                              | T | 379101 | 5407  | 373694 | 3.29E-05 | -10.3231  | 73.4057  | 1.08E-67  | 1.00E+58  | 0.888161 | 0.998648 |
| Operations and Procedures | Facilitating operations NOC                                      | T | 379101 | 2533  | 376568 | 7.22E-05 | -9.53539  | 69.9011  | 2.28E-64  | 2.29E+55  | 0.891495 | 0.998648 |
| Operations and Procedures | Minimal access to thoracic cavity                                | T | 379101 | 726   | 378375 | 3.59     | 1.2781    | 1.00532  | 0.5       | 25.8      | 0.203609 | 0.998648 |
| Operations and Procedures | Minimal access to abdominal cavity                               | T | 379101 | 14863 | 364238 | 0.524    | -0.646211 | 0.58365  | 0.167     | 1.65      | 0.268213 | 0.998648 |
| Operations and Procedures | Arteriotomy approach to organ under image control                | T | 379101 | 426   | 378675 | 5.80E-05 | -9.75448  | 191.401  | 6.92E-168 | 4.87E+158 | 0.959354 | 0.998648 |
| Operations and Procedures | Approach to organ through artery                                 | T | 379101 | 284   | 378817 | 7.22E-05 | -9.53586  | 186.968  | 5.11E-164 | 1.02E+155 | 0.959324 | 0.998648 |
| Operations and Procedures | General anaesthetic                                              | T | 379101 | 15356 | 365565 | 0.885    | -0.122038 | 0.438109 | 0.375     | 2.09      | 0.780585 | 0.998648 |
| Operations and Procedures | Spinal anaesthetic                                               | T | 379101 | 6624  | 372477 | 2.81E-05 | -10.4801  | 70.6346  | 2.10E-65  | 3.75E+55  | 0.88205  | 0.998648 |
| Operations and Procedures | Local anaesthetic                                                | T | 379101 | 23563 | 355538 | 1.28     | 0.243493  | 0.306893 | 0.699     | 2.33      | 0.427538 | 0.998648 |
| Operations and Procedures | Other anaesthetic                                                | T | 379101 | 5945  | 373156 | 1.62     | 0.480927  | 0.5133   | 0.591     | 4.42      | 0.384794 | 0.998648 |
| Operations and Procedures | Other non operations                                             | T | 379101 | 2978  | 376123 | 7.94E-05 | -9.4405   | 68.165   | 7.53E-63  | 8.38E+53  | 0.889849 | 0.998648 |
| Operations and Procedures | External beam radiotherapy                                       | T | 379101 | 1376  | 377725 | 4.25E-05 | -10.0669  | 117.542  | 3.75E-105 |           |          |          |

|                  |                                                                      |   |        |        |        |          |           |          |           |           |          |          |
|------------------|----------------------------------------------------------------------|---|--------|--------|--------|----------|-----------|----------|-----------|-----------|----------|----------|
| Medication       | Ranitidine e g Zantac                                                | T | 374768 | 7205   | 367563 | 0.377    | -0.974724 | 1.00369  | 0.0528    | 2.7       | 0.331481 | 0.998648 |
| Medication       | Omeprazole e g Zantrol                                               | T | 374768 | 22414  | 352354 | 1.38     | 0.319202  | 0.315961 | 0.741     | 2.56      | 0.312372 | 0.998648 |
| Medication       | Laxatives a g Dulcolax Senokot                                       | T | 374768 | 10818  | 363950 | 1.05     | 0.050506  | 0.509566 | 0.387     | 2.86      | 0.921047 | 0.998648 |
| Medication       | Vitamin A                                                            | T | 377036 | 7193   | 369843 | 0.363    | -1.01391  | 1.00363  | 0.0507    | 2.59      | 0.312376 | 0.998648 |
| Medication       | Vitamin C                                                            | T | 377036 | 32744  | 344292 | 0.872    | -0.136743 | 0.313915 | 0.471     | 1.61      | 0.663122 | 0.998648 |
| Medication       | Vitamin D                                                            | T | 377036 | 14603  | 362433 | 0.539    | -0.617751 | 0.584856 | 0.171     | 1.7       | 0.290856 | 0.998648 |
| Medication       | Vitamin E                                                            | T | 377036 | 11056  | 365980 | 0.716    | -0.334382 | 0.584023 | 0.228     | 2.25      | 0.56695  | 0.998648 |
| Medication       | Folic acid or Folate Vit B9                                          | T | 377036 | 8174   | 368862 | 0.327    | -1.11788  | 1.0038   | 0.0457    | 2.34      | 0.26543  | 0.998648 |
| Medication       | Multivitamins minerals                                               | T | 377036 | 81736  | 295300 | 1.09     | 0.082511  | 0.199003 | 0.735     | 1.6       | 0.67842  | 0.998648 |
| Neurosciences    | Headache                                                             | T | 378231 | 81591  | 296640 | 1.1      | 0.092408  | 0.201149 | 0.739     | 1.63      | 0.645948 | 0.998648 |
| Neurosciences    | Facial pain                                                          | T | 378231 | 12842  | 365389 | 0.422    | -0.863658 | 0.712016 | 0.104     | 1.7       | 0.225139 | 0.998648 |
| Neurosciences    | Neck or shoulder pain                                                | T | 378231 | 92289  | 285942 | 0.874    | -0.135117 | 0.20296  | 0.587     | 1.3       | 0.505582 | 0.998648 |
| Neurosciences    | Stomach or abdominal pain                                            | T | 378231 | 37960  | 340271 | 0.69     | -0.371428 | 0.328525 | 0.362     | 1.31      | 0.258227 | 0.998648 |
| Neurosciences    | Knee pain                                                            | T | 378231 | 86052  | 292179 | 0.762    | -0.271308 | 0.217145 | 0.498     | 1.17      | 0.211507 | 0.998648 |
| Neurosciences    | Pain all over the body                                               | T | 378231 | 5847   | 372384 | 0.469    | -0.757062 | 1.00365  | 0.0656    | 3.35      | 0.450663 | 0.998648 |
| Medication       | Fish oil including cod liver oil                                     | T | 377850 | 119641 | 258209 | 1.03     | 0.024893  | 0.181749 | 0.718     | 1.46      | 0.891062 | 0.998648 |
| Medication       | Calcium                                                              | T | 377850 | 25583  | 352267 | 1.09     | 0.08213   | 0.334131 | 0.564     | 2.09      | 0.805835 | 0.998648 |
| Medication       | Zinc                                                                 | T | 377850 | 15460  | 362390 | 0.499    | -0.695071 | 0.583819 | 0.159     | 1.57      | 0.233827 | 0.998648 |
| Medication       | Selenium                                                             | T | 377850 | 9070   | 368780 | 1.17     | 0.154095  | 0.507733 | 0.431     | 3.16      | 0.761512 | 0.998648 |
| Cardiovascular   | Hypertension (HES and self-reported)                                 | T | 379101 | 98025  | 281076 | 1.03     | 0.033992  | 0.194949 | 0.706     | 1.52      | 0.861578 | 0.998648 |
| Cardiovascular   | Heartcardiac problem (HES and self-reported)                         | T | 379101 | 25675  | 353426 | 0.692    | -0.367631 | 0.39514  | 0.319     | 1.5       | 0.352173 | 0.998648 |
| Cardiovascular   | Peripheral vascular disease (HES and self-reported)                  | T | 379101 | 1859   | 377242 | 3.71E-05 | -10.203   | 118.904  | 2.27E-106 | 6.05E+96  | 0.931619 | 0.998648 |
| Cardiovascular   | Venous thromboembolic disease (HES and self-reported)                | T | 379101 | 3983   | 375118 | 1.32     | 0.279195  | 0.713007 | 0.327     | 5.35      | 0.695373 | 0.998648 |
| Cardiovascular   | Essential hypertension (HES and self-reported)                       | T | 379101 | 71076  | 380025 | 0.915    | -0.088761 | 0.227943 | 0.585     | 1.43      | 0.696982 | 0.998648 |
| Cardiovascular   | Gestational hypertensionpreeclampsia (HES and self-reported)         | T | 379101 | 2534   | 376567 | 3.74E-05 | -10.1929  | 107.609  | 9.43E-97  | 1.49E+87  | 0.924536 | 0.998648 |
| Cardiovascular   | Heart attackmyocardial infarction (HES and self-reported)            | T | 379101 | 12068  | 367033 | 0.632    | -0.458306 | 0.589614 | 0.199     | 2.01      | 0.436983 | 0.998648 |
| Cardiovascular   | Heart failurepulmonary odema (HES and self-reported)                 | T | 379101 | 5221   | 373880 | 3.68E-05 | -10.2089  | 70.1286  | 7.44E-65  | 1.82E+55  | 0.884257 | 0.998648 |
| Cardiovascular   | Heart arrhythmia (HES and self-reported)                             | T | 379101 | 21190  | 357911 | 1.26     | 0.234766  | 0.333938 | 0.657     | 2.43      | 0.482041 | 0.998648 |
| Cardiovascular   | Heart valve problemheart murmur (HES and self-reported)              | T | 379101 | 7532   | 371569 | 1.8      | 0.588838  | 0.457061 | 0.736     | 4.41      | 0.197637 | 0.998648 |
| Cardiovascular   | Cardiomyopathy (HES and self-reported)                               | T | 379101 | 1272   | 377829 | 5.14E-05 | -9.87492  | 119.07   | 2.27E-106 | 1.16E+97  | 0.933904 | 0.998648 |
| Cardiovascular   | Pericardial problem (HES and self-reported)                          | T | 379101 | 1268   | 377833 | 2.06     | 0.721236  | 1.00492  | 0.287     | 14.7      | 0.472938 | 0.998648 |
| Cardiovascular   | Stroke (HES and self-reported)                                       | T | 379101 | 8571   | 370530 | 1.58     | 0.460568  | 0.458677 | 0.645     | 3.89      | 0.31532  | 0.998648 |
| Cardiovascular   | Transient ischaemic attack tia (HES and self-reported)               | T | 379101 | 3570   | 375531 | 0.759    | -0.275716 | 1.00566  | 0.106     | 5.45      | 0.783958 | 0.998648 |
| Cardiovascular   | Subdural haemorrhagehaematoma (HES and self-reported)                | T | 379101 | 380    | 378721 | 6.67E-05 | -9.61519  | 194.83   | 9.58E-171 | 4.64E+161 | 0.960639 | 0.998648 |
| Cardiovascular   | Arterial embolism (HES and self-reported)                            | T | 379101 | 762    | 378339 | 9.70E-05 | -9.24103  | 115.869  | 2.28E-103 | 4.13E+94  | 0.936433 | 0.998648 |
| Cardiovascular   | Deep venous thrombosis dvt (HES and self-reported)                   | T | 379101 | 8917   | 370184 | 1.52     | 0.417009  | 0.456424 | 0.62      | 3.71      | 0.369094 | 0.998648 |
| Respiratory      | Interstitial lung disease (HES and self-reported)                    | T | 379101 | 1083   | 378018 | 6.66E-05 | -9.61722  | 116.837  | 2.34E-104 | 1.89E+95  | 0.934398 | 0.998648 |
| Respiratory      | Asbestosis (HES and self-reported)                                   | T | 379101 | 271    | 378830 | 4.11E-05 | -10.0993  | 286.554  | 4.95E-249 | 3.42E+239 | 0.971885 | 0.998648 |
| Respiratory      | Pulmonary fibrosis (HES and self-reported)                           | T | 379101 | 789    | 378312 | 9.40E-05 | -9.27219  | 116.115  | 1.36E-103 | 6.49E+94  | 0.936534 | 0.998648 |
| ENT              | Sleep apnoea (HES and self-reported)                                 | T | 379101 | 4559   | 374542 | 0.554    | -0.591111 | 1.00432  | 0.0773    | 3.96      | 0.556149 | 0.998648 |
| Digestive system | Oesophageal disorder (HES and self-reported)                         | T | 379101 | 9080   | 370021 | 1.19     | 0.171365  | 0.509036 | 0.438     | 3.22      | 0.736384 | 0.998648 |
| Digestive system | Stomach disorder (HES and self-reported)                             | T | 379101 | 7348   | 371753 | 1.53     | 0.426665  | 0.508251 | 0.566     | 4.15      | 0.401202 | 0.998648 |
| Digestive system | Other abdominal problem (HES and self-reported)                      | T | 379101 | 39890  | 339211 | 1.09     | 0.089126  | 0.266727 | 0.648     | 1.84      | 0.738268 | 0.998648 |
| Digestive system | Gastroesophageal reflux gord gastric reflux (HES and self-reported)  | T | 379101 | 32601  | 346500 | 0.91     | -0.094823 | 0.314802 | 0.491     | 1.69      | 0.763251 | 0.998648 |
| Digestive system | Oesophagitisbarretts oesophagus (HES and self-reported)              | T | 379101 | 10521  | 368580 | 1.02     | 0.021674  | 0.508528 | 0.377     | 2.77      | 0.966004 | 0.998648 |
| Digestive system | Oesophageal stricture (HES and self-reported)                        | T | 379101 | 1781   | 377320 | 3.84E-05 | -10.1665  | 118.796  | 2.91E-106 | 5.08E+96  | 0.9318   | 0.998648 |
| Digestive system | Oesophageal varicies (HES and self-reported)                         | T | 379101 | 501    | 378600 | 5.05E-05 | -9.89441  | 195.934  | 8.49E-172 | 3.00E+162 | 0.959723 | 0.998648 |
| Digestive system | Gastricstomach ulcers (HES and self-reported)                        | T | 379101 | 6128   | 372973 | 0.898    | -0.107482 | 0.713436 | 0.222     | 3.64      | 0.880249 | 0.998648 |
| Digestive system | Gastritisgastric erosions (HES and self-reported)                    | T | 379101 | 21127  | 357974 | 1.06     | 0.06186   | 0.365356 | 0.52      | 2.18      | 0.865549 | 0.998648 |
| Digestive system | Irritable bowel syndrome (HES and self-reported)                     | T | 379101 | 12379  | 366722 | 0.665    | -0.408564 | 0.584598 | 0.211     | 2.09      | 0.484626 | 0.998648 |
| Digestive system | Hepatitis (HES and self-reported)                                    | T | 379101 | 1662   | 377439 | 4.08E-05 | -10.107   | 120.708  | 7.28E-108 | 2.29E+98  | 0.93327  | 0.998648 |
| Digestive system | Infectiveviral hepatitis (HES and self-reported)                     | T | 379101 | 1240   | 377861 | 5.37E-05 | -9.83251  | 120.723  | 9.30E-108 | 3.10E+98  | 0.935087 | 0.998648 |
| Digestive system | Noninfective hepatitis (HES and self-reported)                       | T | 379101 | 1195   | 377906 | 5.72E-05 | -9.76918  | 120.754  | 9.32E-108 | 3.51E+98  | 0.935521 | 0.998648 |
| Digestive system | Bile duct obstructionascending cholangitis (HES and self-reported)   | T | 379101 | 936    | 378165 | 7.12E-05 | -9.54599  | 120.118  | 4.04E-107 | 1.26E+98  | 0.936633 | 0.998648 |
| Digestive system | Cholelithiasisgall stones (HES and self-reported)                    | T | 379101 | 16555  | 362546 | 1.56     | 0.446478  | 0.346968 | 0.792     | 3.08      | 0.198165 | 0.998648 |
| Digestive system | Cholecystitis (HES and self-reported)                                | T | 379101 | 2791   | 376310 | 6.76E-05 | -9.60143  | 72.9683  | 5.23E-67  | 8.75E+57  | 0.895314 | 0.998648 |
| Digestive system | Peritonitis (HES and self-reported)                                  | T | 379101 | 1989   | 377112 | 2.7      | 0.991897  | 0.712938 | 0.667     | 10.9      | 0.16414  | 0.998648 |
| Digestive system | Gastrointestinal bleeding (HES and self-reported)                    | T | 379101 | 8293   | 370808 | 1.64     | 0.49299   | 0.456031 | 0.67      | 4         | 0.279677 | 0.998648 |
| Genitourinary    | Renalkidney failure (HES and self-reported)                          | T | 379101 | 8356   | 370745 | 0.958    | -0.042568 | 0.586798 | 0.303     | 3.03      | 0.94217  | 0.998648 |
| Genitourinary    | Renal failure requiring dialysis (HES and self-reported)             | T | 379101 | 660    | 378441 | 0.000101 | -9.19719  | 120.001  | 7.22E-107 | 1.42E+98  | 0.938908 | 0.998648 |
| Genitourinary    | Urinary tract infectionkidney infection (HES and self-reported)      | T | 379101 | 12655  | 366446 | 1.09     | 0.085028  | 0.456433 | 0.445     | 2.66      | 0.85222  | 0.998648 |
| Genitourinary    | Kidney stoneureter stonebladder stone (HES and self-reported)        | T | 379101 | 6694   | 372407 | 2.62E-05 | -10.5503  | 72.3144  | 7.29E-67  | 9.40E+56  | 0.884004 | 0.998648 |
| Genitourinary    | Ureteric obstructionhydrophrosis (HES and self-reported)             | T | 379101 | 2626   | 376475 | 0.989    | -0.010589 | 1.00429  | 0.138     | 7.08      | 0.991587 | 0.998648 |
| Genitourinary    | Bladder problem not cancer (HES and self-reported)                   | T | 379101 | 10748  | 368353 | 1.23     | 0.208566  | 0.457707 | 0.502     | 3.02      | 0.648623 | 0.998648 |
| Genitourinary    | Urinary frequency incontinence (HES and self-reported)               | T | 379101 | 11734  | 367367 | 0.953    | -0.048216 | 0.508625 | 0.352     | 2.58      | 0.924476 | 0.998648 |
| Genitourinary    | Scrotal problem not cancer (HES and self-reported)                   | T | 379101 | 1382   | 377719 | 4.83E-08 | -16.8457  | 364.67   | 0         | inf       | 0.996314 | 0.998648 |
| Genitourinary    | Testicular problems not cancer (HES and self-reported)               | T | 379101 | 1283   | 377818 | 1.9      | 0.640398  | 1.00749  | 0.263     | 13.7      | 0.525012 | 0.998648 |
| Metabolic        | Diabetes (HES and self-reported)                                     | T | 379101 | 15907  | 363194 | 0.482    | -0.729971 | 0.585752 | 0.153     | 1.52      | 0.212687 | 0.998648 |
| Metabolic        | Gestational diabetes (HES and self-reported)                         | T | 379101 | 363    | 378738 | 8.20E-05 | -9.40836  | 185.127  | 2.14E-162 | 3.14E+153 | 0.959468 | 0.998648 |
| Metabolic        | Type 1 diabetes (HES and self-reported)                              | T | 379101 | 2663   | 376438 | 0.978    | -0.022031 | 1.00407  | 0.137     | 7         | 0.982494 | 0.998648 |
| Metabolic        | Hyperthyroidismthyrotoxicosis (HES and self-reported)                | T | 379101 | 4020   | 375081 | 0.693    | -0.366494 | 1.00496  | 0.0967    | 4.97      | 0.715348 | 0.998648 |
| Metabolic        | Hypothyroidismmyxoedema (HES and self-reported)                      | T | 379101 | 22541  | 356560 | 0.734    | -0.309824 | 0.421698 | 0.321     | 1.68      | 0.462519 | 0.998648 |
| Metabolic        | Thyroid radioablation therapy (HES and self-reported)                | T | 379101 | 2506   | 376595 | 1.98     | 0.685061  | 0.715262 | 0.488     | 8.06      | 0.338175 | 0.998648 |
| Metabolic        | Parathyroid gland problem not cancer (HES and self-reported)         | T | 379101 | 274    | 378827 | 9.41E-05 | -9.27164  | 196.535  | 4.78E-172 | 1.85E+163 | 0.962373 | 0.998648 |
| Metabolic        | Parathyroid hyperplasiaadenoma (HES and self-reported)               | T | 379101 | 419    | 378682 | 6.66E-05 | -9.61743  | 193.251  | 2.11E-169 | 2.10E+160 | 0.960308 | 0.998648 |
| Metabolic        | Disorder of adrenal gland (HES and self-reported)                    | T | 379101 | 470    | 378631 | 5.29E-05 | -9.84678  | 199.107  | 1.74E-174 | 1.61E+165 | 0.960557 | 0.998648 |
| Metabolic        | Adrenocortical insufficiencyaddisons disease (HES and self-reported) | T | 379101 | 349    | 378752 | 7.00E-05 | -9.56721  | 198.908  | 3.40E-174 | 1.44E+165 | 0.961638 | 0.998648 |
| Metabolic        | Disorder or pituitary gland (HES and self-reported)                  | T | 379101 | 409    | 378692 | 6.21E-05 | -9.68683  | 199.281  | 1.45E-174 | 2.66E+165 | 0.961231 | 0.998648 |
| Metabolic        | Pituitary adenomatumour (HES and self-reported)                      | T | 379101 | 466    | 378635 | 5.34E-05 | -9.83699  | 199.359  | 1.07E-174 | 2.66E+165 | 0.960446 | 0.998648 |
| Eye              | Eyeeyelid problem (HES and self-reported)                            | T | 379101 | 17843  | 361258 | 0.897    | -0.1092   | 0.418214 | 0.395     | 2.04      | 0.790407 | 0.998648 |
| Neurosciences    | Psychologicalpsychiatric prob (HES and self-reported)                | T | 379101 | 2225   | 376876 | 8.17E-05 | -9.41305  | 73.421   | 2.60E-67  | 2.57E+58  | 0.897986 | 0.998648 |
| Neurosciences    | Infection of nervous system (HES and self-reported)                  | T | 379101 | 529    | 378572 | 4.55E-05 | -9.99841  | 199.567  | 6.07E-175 | 3.41E+165 | 0.960042 | 0.998648 |
| Neurosciences    | Encephalitis (HES and self-reported)                                 | T | 379101 | 415    | 378686 | 5.77E-05 | -9.75995  | 199.731  | 5.58E-175 | 5.97E+165 | 0.961027 | 0.998648 |
| Neurosciences    | Meningitis (HES and self-reported)                                   | T | 379101 | 1714   | 377387 | 3.73E-05 | -10.1954  | 121.105  | 3.06E-108 | 4.56E+98  | 0.932908 | 0.998648 |
|                  |                                                                      |   |        |        |        |          |           |          |           |           |          |          |

|                            |                                                                            |     |        |       |        |          |           |          |           |           |          |          |
|----------------------------|----------------------------------------------------------------------------|-----|--------|-------|--------|----------|-----------|----------|-----------|-----------|----------|----------|
| Musculoskeletal            | Pagets disease (HES and self-reported)                                     | T   | 379101 | 272   | 378829 | 9.44E-05 | -9.26828  | 197.317  | 1.04E-172 | 8.60E+163 | 0.962536 | 0.998648 |
| Musculoskeletal            | Spine arthritispondylitis (HES and self-reported)                          | T   | 379101 | 10404 | 368697 | 0.538    | -0.620245 | 0.713146 | 0.133     | 2.18      | 0.384447 | 0.998648 |
| Musculoskeletal            | Prolapsed discliplined disc (HES and self-reported)                        | T   | 379101 | 8220  | 370881 | 0.969    | -0.031826 | 0.583617 | 0.309     | 3.04      | 0.956511 | 0.998648 |
| Musculoskeletal            | Ankylosing spondylitis (HES and self-reported)                             | T   | 379101 | 1308  | 377793 | 5.12E-05 | -9.87941  | 120.325  | 1.94E-107 | 1.36E+98  | 0.934562 | 0.998648 |
| Musculoskeletal            | Myositismyopathy (HES and self-reported)                                   | T   | 379101 | 338   | 378763 | 7.26E-05 | -9.53044  | 199.339  | 1.51E-174 | 3.48E+165 | 0.961867 | 0.998648 |
| Haematology                | Low plateletsplatelet disorder (HES and self-reported)                     | T   | 379101 | 1618  | 377483 | 4.18E-05 | -10.0835  | 120.566  | 9.84E-108 | 1.77E+98  | 0.933347 | 0.998648 |
| Haematology                | Iron deficiency anaemia (HES and self-reported)                            | T   | 379101 | 8597  | 370504 | 1.62     | 0.479385  | 0.455903 | 0.661     | 3.95      | 0.293026 | 0.998648 |
| Haematology                | Pernicious anaemia (HES and self-reported)                                 | T   | 379101 | 1499  | 377602 | 5.06E-05 | -9.89228  | 119.144  | 1.93E-106 | 1.32E+97  | 0.933829 | 0.998648 |
| Haematology                | Aplastic anaemia (HES and self-reported)                                   | T   | 379101 | 429   | 378672 | 6.01E-05 | -9.71898  | 196.316  | 4.69E-172 | 7.70E+162 | 0.960515 | 0.998648 |
| Gynaecology and Obstetrics | Gynaecological disorder not c (HES and self-reported)                      | T   | 379101 | 16832 | 362269 | 1.03     | 0.027452  | 0.427006 | 0.445     | 2.37      | 0.94874  | 0.998648 |
| Gynaecology and Obstetrics | Ovarian cyst or cysts (HES and self-reported)                              | T   | 379101 | 6134  | 372967 | 3.41E-08 | -17.194   | 2203.33  | 0         | Inf       | 0.993774 | 0.998648 |
| Gynaecology and Obstetrics | Polycystic ovariespolycystic ovarian syndrome (HES and self-reported)      | T   | 379101 | 580   | 378521 | 6.44E-08 | -16.558   | 5715.8   | 0         | Inf       | 0.997689 | 0.998648 |
| Gynaecology and Obstetrics | Uterine fibroids (HES and self-reported)                                   | T   | 379101 | 13674 | 365427 | 5.99E-06 | -12.0252  | 109.115  | 7.89E-99  | 4.55E+87  | 0.912245 | 0.998648 |
| Gynaecology and Obstetrics | Uterine polyps (HES and self-reported)                                     | T   | 379101 | 8016  | 371085 | 1.43     | 0.358289  | 0.515108 | 0.521     | 3.93      | 0.486704 | 0.998648 |
| Gynaecology and Obstetrics | Breast disease not cancer (HES and self-reported)                          | T   | 379101 | 3704  | 375397 | 0.795    | -0.229754 | 1.00636  | 0.111     | 5.71      | 0.819412 | 0.998648 |
| Gynaecology and Obstetrics | Fibrocystic disease (HES and self-reported)                                | T   | 379101 | 1743  | 377358 | 4.99E-05 | -9.90514  | 111.372  | 7.88E-100 | 3.16E+90  | 0.929132 | 0.998648 |
| Gynaecology and Obstetrics | Breast cysts (HES and self-reported)                                       | T   | 379101 | 1673  | 377428 | 5.38E-05 | -9.82981  | 110.975  | 1.85E-99  | 1.57E+90  | 0.929419 | 0.998648 |
| Immuno-inflammation        | Sarcoidosis (HES and self-reported)                                        | T   | 379101 | 930   | 378171 | 6.70E-05 | -9.61079  | 120.997  | 6.78E-108 | 6.62E+98  | 0.93669  | 0.998648 |
| Musculoskeletal            | Vasculitis (HES and self-reported)                                         | T   | 379101 | 1756  | 377345 | 1.56     | 0.442687  | 1.00576  | 0.217     | 11.2      | 0.659828 | 0.998648 |
| Immuno-inflammation        | Connective tissue disorder (HES and self-reported)                         | T   | 379101 | 2304  | 376797 | 1.2      | 0.185095  | 1.00527  | 0.168     | 8.63      | 0.853915 | 0.998648 |
| Immuno-inflammation        | Allergyhypersensitivityanaph (HES and self-reported)                       | T   | 379101 | 3101  | 376000 | 0.902    | -0.10319  | 1.00396  | 0.126     | 6.45      | 0.918135 | 0.998648 |
| Musculoskeletal            | Giant celltemporal arteritis (HES and self-reported)                       | T   | 379101 | 395   | 378706 | 7.48E-05 | -9.50122  | 188.67   | 1.88E-165 | 2.97E+156 | 0.959836 | 0.998648 |
| Musculoskeletal            | Polymyalgia rheumatica (HES and self-reported)                             | T   | 379101 | 1540  | 377561 | 4.92E-05 | -9.92014  | 114.771  | 9.92E-103 | 2.44E+93  | 0.931121 | 0.998648 |
| Musculoskeletal            | Systemic lupus erythematosiss (HES and self-reported)                      | T   | 379101 | 547   | 378554 | 5.51E-05 | -9.806    | 192.993  | 2.90E-169 | 1.05E+160 | 0.959477 | 0.998648 |
| Musculoskeletal            | Sjogrens syndromesicca syndrome (HES and self-reported)                    | T   | 379101 | 614   | 378487 | 5.01E-05 | -9.90225  | 189.163  | 4.79E-166 | 5.23E+156 | 0.958252 | 0.998648 |
| Musculoskeletal            | Sclerodermasystemic sclerosis (HES and self-reported)                      | T   | 379101 | 201   | 378900 | 5.02E-05 | -9.90029  | 318.111  | 8.29E-276 | 3.03E+266 | 0.975172 | 0.998648 |
| Immuno-inflammation        | Allergy or anaphylactic reaction to drug (HES and self-reported)           | T   | 379101 | 4200  | 374901 | 4.39E-05 | -10.0338  | 73.2011  | 2.15E-67  | 8.96E+57  | 0.890974 | 0.998648 |
| Immuno-inflammation        | Hayfeverallergic rhinitis (HES and self-reported)                          | T   | 379101 | 22257 | 356844 | 1.27     | 0.24143   | 0.31463  | 0.687     | 2.36      | 0.442875 | 0.998648 |
| Neurosciences              | Other demyelinating disease not multiple sclerosis (HES and self-reported) | T   | 379101 | 1324  | 377777 | 5.11E-05 | -9.88262  | 120.269  | 2.15E-107 | 1.21E+98  | 0.934511 | 0.998648 |
| Digestive system           | Peptic ulcer (HES and self-reported)                                       | T   | 379101 | 770   | 378331 | 3.61     | 1.28245   | 1.00625  | 0.502     | 25.9      | 0.202495 | 0.998648 |
| Gynaecology and Obstetrics | Endometriosis (HES and self-reported)                                      | T   | 379101 | 5960  | 373141 | 0.484    | -0.724908 | 1.00833  | 0.0671    | 3.5       | 0.472189 | 0.998648 |
| Gynaecology and Obstetrics | Female infertility (HES and self-reported)                                 | T   | 379101 | 1328  | 377773 | 7.90E-08 | -16.354   | 3480.95  | 0         | Inf       | 0.996251 | 0.998648 |
| Genitourinary              | Other renalkidney problem (HES and self-reported)                          | T   | 379101 | 5423  | 373678 | 3.26E-05 | -10.3324  | 72.9979  | 2.37E-67  | 4.46E+57  | 0.88744  | 0.998648 |
| Musculoskeletal            | Muscle or soft tissue injuries (HES and self-reported)                     | T   | 379101 | 9386  | 369115 | 0.561    | -0.577867 | 0.71193  | 0.139     | 2.26      | 0.416969 | 0.998648 |
| Musculoskeletal            | Burns (HES and self-reported)                                              | T   | 379101 | 765   | 378336 | 3.4      | 1.22441   | 1.00478  | 0.475     | 24.4      | 0.223003 | 0.998648 |
| Other                      | Other substance abusedependency (HES and self-reported)                    | T   | 379101 | 10328 | 368773 | 0.786    | -0.240826 | 0.584511 | 0.25      | 2.47      | 0.68033  | 0.998648 |
| Respiratory                | Bronchitis (HES and self-reported)                                         | T   | 379101 | 3358  | 375743 | 1.6      | 0.468215  | 0.712538 | 0.395     | 6.45      | 0.51111  | 0.998648 |
| ENT                        | Throat or larynx disorder (HES and self-reported)                          | T   | 379101 | 3484  | 375617 | 5.29E-05 | -9.8474   | 73.4089  | 1.72E-67  | 1.62E+58  | 0.893288 | 0.998648 |
| ENT                        | Earvestibular disorder (HES and self-reported)                             | T   | 379101 | 12078 | 367023 | 0.884    | -0.122956 | 0.50765  | 0.327     | 2.39      | 0.80862  | 0.998648 |
| ENT                        | Chronic sinusitis (HES and self-reported)                                  | T   | 379101 | 4361  | 374740 | 0.604    | -0.50413  | 1.00355  | 0.0845    | 4.32      | 0.615423 | 0.998648 |
| ENT                        | Chronic laryngitis (HES and self-reported)                                 | T   | 379101 | 1014  | 378087 | 6.94E-05 | -9.57496  | 119.614  | 1.06E-106 | 4.56E+97  | 0.936198 | 0.998648 |
| ENT                        | Vocal cord polyp (HES and self-reported)                                   | T   | 379101 | 392   | 378709 | 6.72E-05 | -9.60749  | 198.354  | 9.66E-174 | 4.68E+164 | 0.961369 | 0.998648 |
| ENT                        | Otosclerosis (HES and self-reported)                                       | T   | 379101 | 416   | 378685 | 5.78E-05 | -9.75819  | 199.274  | 1.37E-174 | 2.44E+165 | 0.960944 | 0.998648 |
| ENT                        | Menieres disease (HES and self-reported)                                   | T   | 379101 | 1305  | 377796 | 5.31E-05 | -9.8424   | 120.099  | 3.13E-107 | 9.03E+97  | 0.934685 | 0.998648 |
| Genitourinary              | Polycystic kidney (HES and self-reported)                                  | T   | 379101 | 1630  | 377471 | 4.13E-05 | -10.0936  | 119.217  | 1.37E-106 | 1.25E+97  | 0.932527 | 0.998648 |
| ENT                        | Thyroiditis (HES and self-reported)                                        | T   | 379101 | 442   | 378659 | 6.33E-05 | -9.66736  | 192.333  | 1.21E-168 | 3.30E+159 | 0.959912 | 0.998648 |
| Metabolic                  | Hypopituitarism (HES and self-reported)                                    | T   | 379101 | 446   | 378655 | 5.59E-05 | -9.79206  | 198.972  | 2.39E-174 | 1.31E+165 | 0.960749 | 0.998648 |
| Neurosciences              | Other neurological problem (HES and self-reported)                         | T   | 379101 | 8378  | 370723 | 0.954    | -0.046694 | 0.583762 | 0.304     | 3         | 0.936247 | 0.998648 |
| Neurosciences              | Myasthenia gravis (HES and self-reported)                                  | T   | 379101 | 206   | 378895 | 0.000121 | -0.01975  | 198.008  | 3.43E-173 | 4.27E+164 | 0.963667 | 0.998648 |
| Infectious disease         | Hiv aids (HES and self-reported)                                           | T   | 379101 | 309   | 378792 | 8.41E-05 | -9.3833   | 183.133  | 1.09E-160 | 6.47E+151 | 0.959136 | 0.998648 |
| Infectious disease         | Tuberculosis tb (HES and self-reported)                                    | T   | 379101 | 1905  | 377196 | 3.81E-05 | -10.1761  | 117.845  | 1.86E-105 | 7.80E+95  | 0.931087 | 0.998648 |
| Infectious disease         | Malaria (HES and self-reported)                                            | T   | 379101 | 480   | 378621 | 4.83E-05 | -9.9388   | 198.499  | 5.22E-174 | 4.46E+164 | 0.960607 | 0.998648 |
| Infectious disease         | Helicobacter pylori (HES and self-reported)                                | T   | 379101 | 1773  | 377328 | 4.35E-05 | -10.0436  | 118.938  | 2.49E-106 | 7.59E+96  | 0.932704 | 0.998648 |
| Haematology                | Clotting disorderexcessive bleeding (HES and self-reported)                | T   | 379101 | 2706  | 376395 | 6.72E-05 | -9.60717  | 73.3476  | 2.47E-67  | 1.83E+58  | 0.895759 | 0.998648 |
| Haematology                | Anaemia (HES and self-reported)                                            | T   | 379101 | 17268 | 361833 | 1.46     | 0.377229  | 0.34526  | 0.741     | 2.87      | 0.274572 | 0.998648 |
| Haematology                | Pancytopenia (HES and self-reported)                                       | T   | 379101 | 406   | 378695 | 6.36E-05 | -9.66228  | 196.084  | 7.83E-172 | 5.17E+162 | 0.960699 | 0.998648 |
| Haematology                | Neutropenialymphopenia (HES and self-reported)                             | T   | 379101 | 2972  | 376129 | 6.23E-05 | -9.68284  | 73.0829  | 3.85E-67  | 1.01E+58  | 0.894596 | 0.998648 |
| Haematology                | Hereditarygenetic haematological disorder (HES and self-reported)          | T   | 379101 | 463   | 378638 | 5.33E-05 | -9.83927  | 199.194  | 1.48E-174 | 1.92E+165 | 0.960604 | 0.998648 |
| Immuno-inflammation        | Eczemadermatitis (HES and self-reported)                                   | T   | 379101 | 11296 | 367805 | 0.679    | -0.387134 | 0.583653 | 0.216     | 2.13      | 0.507141 | 0.998648 |
| Immuno-inflammation        | Psoriasis (HES and self-reported)                                          | T   | 379101 | 5583  | 373518 | 1.45     | 0.373993  | 0.583929 | 0.463     | 4.57      | 0.521862 | 0.998648 |
| Immuno-inflammation        | Blisteringdesquamating skin disorder (HES and self-reported)               | T   | 379101 | 748   | 378353 | 8.70E-05 | -9.35016  | 121.086  | 7.39E-108 | 1.02E+99  | 0.938449 | 0.998648 |
| Digestive system           | Malabsorptioncoeliac disease (HES and self-reported)                       | T   | 379101 | 2523  | 376578 | 1.71E-05 | -9.54313  | 73.1668  | 3.74E-67  | 1.37E+58  | 0.896229 | 0.998648 |
| Digestive system           | Duodenal ulcer (HES and self-reported)                                     | T   | 379101 | 4066  | 375035 | 1.34     | 0.291191  | 0.714662 | 0.33      | 5.43      | 0.683676 | 0.998648 |
| Digestive system           | Diverticular diseasediverticulitis (HES and self-reported)                 | T   | 379101 | 26531 | 352570 | 1.03     | 0.033819  | 0.33178  | 0.54      | 1.98      | 0.918812 | 0.998648 |
| Digestive system           | Colitisnot crohns or ulcerative colitis (HES and self-reported)            | T   | 379101 | 15433 | 363668 | 1.06     | 0.059081  | 0.417574 | 0.468     | 2.4       | 0.887486 | 0.998648 |
| Digestive system           | Rectal or colon adenomapolyps (HES and self-reported)                      | T   | 379101 | 28246 | 350855 | 1.15     | 0.144031  | 0.303818 | 0.637     | 2.09      | 0.635451 | 0.998648 |
| Digestive system           | Inflammatory bowel disease (HES and self-reported)                         | T   | 379101 | 4246  | 374855 | 4.21E-05 | -10.0765  | 73.4694  | 1.22E-67  | 1.45E+58  | 0.889091 | 0.998648 |
| Digestive system           | Crohns disease (HES and self-reported)                                     | T   | 379101 | 1818  | 377283 | 3.63E-05 | -10.2229  | 121.214  | 2.40E-108 | 5.49E+98  | 0.932788 | 0.998648 |
| Digestive system           | Ulcerative colitis (HES and self-reported)                                 | T   | 379101 | 3555  | 375546 | 5.06E-05 | -9.89186  | 73.4131  | 1.64E-67  | 1.56E+58  | 0.892815 | 0.998648 |
| Musculoskeletal            | Rheumatoid arthritis (HES and self-reported)                               | T   | 379101 | 6232  | 372869 | 0.908    | -0.096913 | 0.713303 | 0.224     | 3.67      | 0.891928 | 0.998648 |
| Musculoskeletal            | Osteoarthritis (HES and self-reported)                                     | T   | 379101 | 58523 | 320578 | 0.818    | -0.20146  | 0.256627 | 0.494     | 1.35      | 0.432436 | 0.998648 |
| Musculoskeletal            | Gout (HES and self-reported)                                               | T   | 379101 | 6858  | 372243 | 0.712    | -0.33979  | 0.717124 | 0.175     | 2.9       | 0.635625 | 0.998648 |
| Musculoskeletal            | Other joint disorder (HES and self-reported)                               | T   | 379101 | 9807  | 369294 | 1.41     | 0.344377  | 0.455495 | 0.578     | 3.45      | 0.44962  | 0.998648 |
| Neurosciences              | Diabetic neuropathylulcers (HES and self-reported)                         | T   | 379101 | 546   | 378555 | 4.64E-05 | -9.97884  | 195.135  | 3.66E-171 | 5.87E+161 | 0.959215 | 0.998648 |
| Neurosciences              | Posttraumatic stress disorder (HES and self-reported)                      | T   | 379101 | 723   | 378378 | 9.23E-05 | -9.29026  | 120.178  | 4.65E-107 | 1.83E+98  | 0.938381 | 0.998648 |
| Neurosciences              | Anorexiabulimiaothea eating disorder (HES and self-reported)               | T   | 379101 | 336   | 378765 | 8.96E-05 | -9.32056  | 185.892  | 5.22E-163 | 1.54E+154 | 0.960011 | 0.998648 |
| Digestive system           | Hiatus hernia (HES and self-reported)                                      | T   | 379101 | 27678 | 351423 | 0.676    | -0.391336 | 0.389132 | 0.315     | 1.45      | 0.314577 | 0.998648 |
| Digestive system           | Sclerosing cholangitis (HES and self-reported)                             | T   | 379101 | 454   | 378647 | 5.61E-05 | -9.78832  | 195.459  | 2.35E-171 | 1.34E+162 | 0.96006  | 0.998648 |
| Musculoskeletal            | Sciatica (HES and self-reported)                                           | T   | 379101 | 5455  | 373646 | 0.489    | -0.715012 | 1.00354  | 0.0684    | 3.5       | 0.47616  | 0.998648 |
| Musculoskeletal            | Psoriatic arthropathy (HES and self-reported)                              | T   | 379101 | 1087  | 378014 | 2.54     | 0.930912  | 1.00421  | 0.354     | 18.2      | 0.353922 | 0.998648 |
| Musculoskeletal            | Cervical spondylosis (HES and self-reported)                               | T   | 379101 | 4865  | 374236 | 1.19     | 0.174905  | 0.71331  | 0.294     | 4.82      | 0.8063   | 0.998648 |
| Cardiovascular             | Rheumatic fever (HES and self-reported)                                    | T   | 379101 | 3026  | 376075 | 6.34E-05 | -9.6657   | 71.5455  | 7.97E-66  | 5.05E+56  | 0.892534 | 0.998648 |
| Immuno-inflammation        | Chronic fatigue syndrome (HES and self-reported)                           | T</ |        |       |        |          |           |          |           |           |          |          |

|                            |                                                                        |   |        |       |        |          |           |          |           |           |          |          |
|----------------------------|------------------------------------------------------------------------|---|--------|-------|--------|----------|-----------|----------|-----------|-----------|----------|----------|
| Eye                        | Dry eyes (HES and self-reported)                                       | T | 379101 | 847   | 378254 | 3.42     | 1.23095   | 1.00648  | 0.476     | 24.6      | 0.22132  | 0.998648 |
| Musculoskeletal            | Disc problem (HES and self-reported)                                   | T | 379101 | 8039  | 371062 | 0.657    | -0.420531 | 0.711772 | 0.163     | 2.65      | 0.554639 | 0.998648 |
| Musculoskeletal            | Disc degeneration (HES and self-reported)                              | T | 379101 | 2914  | 376187 | 0.918    | -0.085692 | 1.00386  | 0.128     | 6.57      | 0.931974 | 0.998648 |
| Musculoskeletal            | Back pain (HES and self-reported)                                      | T | 379101 | 14806 | 364295 | 0.722    | -0.325414 | 0.507325 | 0.267     | 1.95      | 0.521243 | 0.998648 |
| Musculoskeletal            | Spinal stenosis (HES and self-reported)                                | T | 379101 | 3421  | 375680 | 0.778    | -0.250947 | 1.00453  | 0.109     | 5.57      | 0.80273  | 0.998648 |
| Musculoskeletal            | Joint pain (HES and self-reported)                                     | T | 379101 | 8344  | 370757 | 1.64     | 0.497514  | 0.455594 | 0.673     | 4.02      | 0.274828 | 0.998648 |
| Musculoskeletal            | Arthritis nos (HES and self-reported)                                  | T | 379101 | 13143 | 365958 | 0.849    | -0.164097 | 0.50922  | 0.313     | 2.3       | 0.747262 | 0.998648 |
| Musculoskeletal            | Plantar fascitis (HES and self-reported)                               | T | 379101 | 448   | 378653 | 5.43E-05 | -9.82154  | 199.54   | 7.63E-175 | 3.86E+165 | 0.960743 | 0.998648 |
| Musculoskeletal            | Carpal tunnel syndrome (HES and self-reported)                         | T | 379101 | 9101  | 370000 | 0.29     | -1.23638  | 1.004    | 0.0406    | 2.08      | 0.218156 | 0.998648 |
| Musculoskeletal            | Fibromyalgia (HES and self-reported)                                   | T | 379101 | 1223  | 377878 | 6.14E-05 | -9.69747  | 116.859  | 2.07E-104 | 1.82E+95  | 0.933864 | 0.998648 |
| Musculoskeletal            | Dupuytren's contracture (HES and self-reported)                        | T | 379101 | 3300  | 375801 | 5.79E-05 | -9.75647  | 70.0539  | 1.35E-64  | 2.48E+55  | 0.889236 | 0.998648 |
| Musculoskeletal            | Neck problem/injury (HES and self-reported)                            | T | 379101 | 520   | 378581 | 4.52E-05 | -10.0049  | 199.464  | 7.37E-175 | 2.77E+165 | 0.959996 | 0.998648 |
| Immuno-inflammation        | Acne vulgaris (HES and self-reported)                                  | T | 379101 | 277   | 378824 | 9.29E-05 | -9.28398  | 195.907  | 1.62E-171 | 5.34E+162 | 0.962203 | 0.998648 |
| Immuno-inflammation        | Lichen planus (HES and self-reported)                                  | T | 379101 | 627   | 378474 | 0.00012  | -9.02506  | 119.344  | 3.11E-106 | 4.66E+97  | 0.93972  | 0.998648 |
| Immuno-inflammation        | Lichen sclerosis (HES and self-reported)                               | T | 379101 | 542   | 378559 | 5.25E-05 | -9.85497  | 190.223  | 6.29E-167 | 4.38E+157 | 0.958682 | 0.998648 |
| Gynaecology and Obstetrics | Ovarian problem (HES and self-reported)                                | T | 379101 | 4956  | 374145 | 4.41E-08 | -16.9362  | 2192.04  | 0         | Inf       | 0.993835 | 0.998648 |
| Gynaecology and Obstetrics | Cervical problem (HES and self-reported)                               | T | 379101 | 6385  | 372716 | 0.442    | -0.816537 | 1.00748  | 0.0613    | 3.18      | 0.417668 | 0.998648 |
| Gynaecology and Obstetrics | Cervical intraepithelial neoplasia cin precan (HES and self-reported)  | T | 379101 | 1670  | 377431 | 4.95E-08 | -16.8204  | 3614.32  | 0         | Inf       | 0.996287 | 0.998648 |
| Gynaecology and Obstetrics | Cervical polyps (HES and self-reported)                                | T | 379101 | 3066  | 376035 | 6.97E-08 | -16.4797  | 2210.57  | 0         | Inf       | 0.994022 | 0.998648 |
| Gynaecology and Obstetrics | Menorrhagia unknown cause (HES and self-reported)                      | T | 379101 | 12816 | 366285 | 1.19     | 0.176032  | 0.468702 | 0.476     | 2.99      | 0.707235 | 0.998648 |
| Gynaecology and Obstetrics | Pelvic inflammatory disease pid (HES and self-reported)                | T | 379101 | 4037  | 375064 | 1.46     | 0.381105  | 0.719056 | 0.358     | 5.99      | 0.596107 | 0.998648 |
| Gynaecology and Obstetrics | Ectopic pregnancy (HES and self-reported)                              | T | 379101 | 539   | 378562 | 5.78E-08 | -16.6659  | 5873.41  | 0         | Inf       | 0.997736 | 0.998648 |
| Gynaecology and Obstetrics | Miscarriage (HES and self-reported)                                    | T | 379101 | 1976  | 377125 | 4.56E-08 | -16.9027  | 3519.92  | 0         | Inf       | 0.996169 | 0.998648 |
| Gynaecology and Obstetrics | Breast fibroadenoma (HES and self-reported)                            | T | 379101 | 1450  | 377651 | 6.02E-05 | -9.71793  | 111.226  | 1.26E-99  | 2.86E+90  | 0.930377 | 0.998648 |
| Musculoskeletal            | Raynauds phenomenon/disease (HES and self-reported)                    | T | 379101 | 1315  | 377786 | 5.30E-05 | -9.84471  | 119.957  | 4.12E-107 | 6.82E+97  | 0.934592 | 0.998648 |
| Immuno-inflammation        | Food intolerance (HES and self-reported)                               | T | 379101 | 306   | 378795 | 7.84E-05 | -9.4541   | 197.811  | 3.27E-173 | 1.88E+164 | 0.961881 | 0.998648 |
| Immuno-inflammation        | Urticaria (HES and self-reported)                                      | T | 379101 | 530   | 378571 | 4.73E-05 | -9.95919  | 199.326  | 1.01E-174 | 2.21E+165 | 0.960151 | 0.998648 |
| Infectious disease         | Infectious mononucleosis glandular fever epste (HES and self-reported) | T | 379101 | 517   | 378584 | 4.31E-05 | -10.0527  | 197.975  | 1.30E-173 | 1.43E+164 | 0.959503 | 0.998648 |
| Infectious disease         | Measles morbillivirus (HES and self-reported)                          | T | 379101 | 1296  | 377805 | 1.87     | 0.627701  | 1.00431  | 0.262     | 13.4      | 0.531968 | 0.998648 |
| Infectious disease         | Mumps epidemic parotitis (HES and self-reported)                       | T | 379101 | 830   | 378271 | 2.9      | 1.06515   | 1.00463  | 0.405     | 20.8      | 0.289034 | 0.998648 |
| Infectious disease         | Rubella german measles (HES and self-reported)                         | T | 379101 | 452   | 378649 | 4.95E-05 | -9.91286  | 197.507  | 3.75E-173 | 6.55E+163 | 0.959971 | 0.998648 |
| Infectious disease         | Chickenpox (HES and self-reported)                                     | T | 379101 | 1557  | 377544 | 1.54     | 0.433447  | 1.00434  | 0.215     | 11        | 0.66605  | 0.998648 |
| Infectious disease         | Shingles (HES and self-reported)                                       | T | 379101 | 734   | 378367 | 3.65     | 1.29446   | 1.00492  | 0.509     | 26.2      | 0.197702 | 0.998648 |
| Infectious disease         | Herpes simplex (HES and self-reported)                                 | T | 379101 | 373   | 378728 | 6.59E-05 | -9.62688  | 199.509  | 9.85E-175 | 4.41E+165 | 0.961515 | 0.998648 |
| Infectious disease         | Hepatitis c (HES and self-reported)                                    | T | 379101 | 331   | 378770 | 7.92E-05 | -9.44345  | 194.792  | 1.23E-170 | 5.12E+161 | 0.961334 | 0.998648 |
| Cardiovascular             | Ischaemic stroke (HES and self-reported)                               | T | 379101 | 2968  | 376133 | 1.82     | 0.598545  | 0.714984 | 0.448     | 7.39      | 0.402512 | 0.998648 |
| Cardiovascular             | Mitral regurgitation incompetence (HES and self-reported)              | T | 379101 | 2024  | 377077 | 2.65     | 0.973305  | 0.71497  | 0.652     | 10.7      | 0.173411 | 0.998648 |
| Cardiovascular             | Aortic valve disease (HES and self-reported)                           | T | 379101 | 2405  | 376696 | 1.1      | 0.092737  | 1.00627  | 0.153     | 7.89      | 0.926572 | 0.998648 |
| Cardiovascular             | Aortic regurgitation incompetence (HES and self-reported)              | T | 379101 | 711   | 378390 | 3.71     | 1.3118    | 1.00593  | 0.517     | 26.7      | 0.19221  | 0.998648 |
| Cardiovascular             | Hypertrophic cardiomyopathy hcm hcmc (HES and self-reported)           | T | 379101 | 265   | 378836 | 9.21E-05 | -9.29304  | 196.543  | 4.61E-172 | 1.84E+163 | 0.962288 | 0.998648 |
| Cardiovascular             | Pericarditis (HES and self-reported)                                   | T | 379101 | 1193  | 377908 | 2.17     | 0.774761  | 1.005    | 0.303     | 15.6      | 0.440761 | 0.998648 |
| Cardiovascular             | Varicose ulcer (HES and self-reported)                                 | T | 379101 | 232   | 378869 | 0.000109 | -9.12827  | 195.625  | 3.28E-171 | 3.59E+162 | 0.962783 | 0.998648 |
| Respiratory                | Respiratory infection (HES and self-reported)                          | T | 379101 | 9656  | 369445 | 1.72     | 0.541402  | 0.417957 | 0.757     | 3.9       | 0.195199 | 0.998648 |
| Respiratory                | Pleural plaques not known asbestosis (HES and self-reported)           | T | 379101 | 690   | 378411 | 3.83     | 1.34379   | 1.01301  | 0.526     | 27.9      | 0.184666 | 0.998648 |
| ENT                        | Tinnitus tinitis (HES and self-reported)                               | T | 379101 | 1088  | 378013 | 6.03E-05 | -9.71655  | 120.024  | 4.11E-107 | 8.84E+97  | 0.935478 | 0.998648 |
| ENT                        | Tonsillitis (HES and self-reported)                                    | T | 379101 | 3534  | 375567 | 4.87E-05 | -9.93013  | 73.2454  | 2.19E-67  | 1.08E+58  | 0.892159 | 0.998648 |
| Digestive system           | Constipation (HES and self-reported)                                   | T | 379101 | 9731  | 369370 | 0.563    | -0.573647 | 0.71221  | 0.14      | 2.28      | 0.420562 | 0.998648 |
| Digestive system           | Bowel intestinal perforation (HES and self-reported)                   | T | 379101 | 387   | 378714 | 6.66E-05 | -9.61692  | 197.703  | 3.43E-173 | 1.29E+164 | 0.961204 | 0.998648 |
| Digestive system           | Bowel intestinal infarction (HES and self-reported)                    | T | 379101 | 264   | 378837 | 0.000101 | -9.19561  | 196.723  | 3.57E-172 | 2.89E+163 | 0.962717 | 0.998648 |
| Digestive system           | Bowel intestinal obstruction (HES and self-reported)                   | T | 379101 | 3937  | 375164 | 0.69     | -0.370579 | 1.00393  | 0.0965    | 4.94      | 0.172033 | 0.998648 |
| Digestive system           | Rectal prolapse (HES and self-reported)                                | T | 379101 | 1030  | 378071 | 7.18E-05 | -9.54093  | 118.309  | 1.41E-105 | 3.66E+96  | 0.935725 | 0.998648 |
| Digestive system           | Alcoholic liver disease alcoholic cirrhosis (HES and self-reported)    | T | 379101 | 824   | 378277 | 3.25     | 1.17931   | 1.00763  | 0.451     | 23.4      | 0.241846 | 0.998648 |
| Digestive system           | Femoral hernia (HES and self-reported)                                 | T | 379101 | 643   | 378458 | 0.00011  | -9.11801  | 119.528  | 1.98E-106 | 6.09E+97  | 0.939194 | 0.998648 |
| Genitourinary              | Diabetic nephropathy (HES and self-reported)                           | T | 379101 | 242   | 378859 | 0.000103 | -9.18119  | 194.167  | 5.42E-170 | 1.95E+161 | 0.962286 | 0.998648 |
| Genitourinary              | Nephritis (HES and self-reported)                                      | T | 379101 | 1824  | 377277 | 3.72E-05 | -10.2004  | 119.378  | 8.98E-107 | 1.54E+97  | 0.931906 | 0.998648 |
| Genitourinary              | Glomerulonephritis (HES and self-reported)                             | T | 379101 | 1746  | 377355 | 3.90E-05 | -10.1526  | 119.351  | 9.93E-107 | 1.53E+97  | 0.93221  | 0.998648 |
| Metabolic                  | Hyperparathyroidism (HES and self-reported)                            | T | 379101 | 788   | 378313 | 3.49     | 1.25054   | 1.00558  | 0.487     | 25.1      | 0.213646 | 0.998648 |
| Eye                        | Blepharitis eyelid infection (HES and self-reported)                   | T | 379101 | 653   | 378448 | 0.000103 | -9.18539  | 119.96   | 7.92E-107 | 1.33E+98  | 0.938965 | 0.998648 |
| Mental health              | Stress (HES and self-reported)                                         | T | 379101 | 662   | 378439 | 4.01     | 1.38982   | 1.00461  | 0.56      | 28.8      | 0.166528 | 0.998648 |
| Mental health              | Obsessive compulsive disorder ocd (HES and self-reported)              | T | 379101 | 208   | 378893 | 0.000112 | -9.09806  | 198.055  | 2.89E-173 | 4.33E+164 | 0.96336  | 0.998648 |
| Mental health              | Insomnia (HES and self-reported)                                       | T | 379101 | 5225  | 373876 | 0.487    | -0.718653 | 1.00414  | 0.0681    | 3.49      | 0.474182 | 0.998648 |
| Musculoskeletal            | Osteopenia (HES and self-reported)                                     | T | 379101 | 990   | 378111 | 8.11E-05 | -9.42029  | 113.176  | 3.73E-101 | 1.76E+92  | 0.933664 | 0.998648 |
| Musculoskeletal            | Soft tissue inflammation (HES and self-reported)                       | T | 379101 | 9317  | 369784 | 1.16     | 0.15037   | 0.507432 | 0.43      | 3.14      | 0.766973 | 0.998648 |
| Musculoskeletal            | Tendonitis tendinitis tenosynovitis (HES and self-reported)            | T | 379101 | 5613  | 373488 | 0.473    | -0.749407 | 1.00364  | 0.0661    | 3.38      | 0.455253 | 0.998648 |
| Musculoskeletal            | Epicondylitis (HES and self-reported)                                  | T | 379101 | 745   | 378356 | 3.6      | 1.27989   | 1.00473  | 0.502     | 25.8      | 0.202711 | 0.998648 |
| Musculoskeletal            | Tennis elbow lateral epicondylitis (HES and self-reported)             | T | 379101 | 796   | 378305 | 3.35     | 1.20776   | 1.00457  | 0.467     | 24        | 0.22926  | 0.998648 |
| Musculoskeletal            | Housemaids knee prepatellar bursitis (HES and self-reported)           | T | 379101 | 300   | 378801 | 8.12E-05 | -9.41845  | 194.804  | 1.23E-170 | 5.37E+161 | 0.961439 | 0.998648 |
| Musculoskeletal            | Fracture skull head (HES and self-reported)                            | T | 379101 | 2136  | 376965 | 8.42E-05 | -9.38224  | 72.6438  | 1.23E-66  | 5.77E+57  | 0.897236 | 0.998648 |
| Musculoskeletal            | Fracture jaw (HES and self-reported)                                   | T | 379101 | 790   | 378311 | 8.46E-05 | -9.37793  | 118.276  | 1.77E-105 | 4.03E+96  | 0.936803 | 0.998648 |
| Musculoskeletal            | Fracture nose (HES and self-reported)                                  | T | 379101 | 1043  | 378058 | 6.12E-05 | -9.70114  | 119.533  | 1.09E-106 | 3.43E+97  | 0.935316 | 0.998648 |
| Musculoskeletal            | Fracture face orbit eye socket (HES and self-reported)                 | T | 379101 | 477   | 378624 | 4.96E-05 | -9.91065  | 195.605  | 1.56E-171 | 1.58E+162 | 0.959591 | 0.998648 |
| Musculoskeletal            | Fracture neck cervical fracture (HES and self-reported)                | T | 379101 | 345   | 378756 | 6.74E-05 | -9.60487  | 197.684  | 3.60E-173 | 1.26E+164 | 0.961248 | 0.998648 |
| Musculoskeletal            | Fracture clavicle collar bone (HES and self-reported)                  | T | 379101 | 1092  | 378009 | 2.24E-05 | -8.808323 | 1.00514  | 0.313     | 16.1      | 0.421287 | 0.998648 |
| Musculoskeletal            | Fracture shoulder scapula (HES and self-reported)                      | T | 379101 | 2722  | 376379 | 1.96     | 0.674493  | 0.71267  | 0.486     | 7.94      | 0.343929 | 0.998648 |
| Musculoskeletal            | Fracture upper arm humerus elbow (HES and self-reported)               | T | 379101 | 3361  | 375740 | 1.57     | 0.451259  | 0.712555 | 0.389     | 6.35      | 0.52654  | 0.998648 |
| Musculoskeletal            | Fracture forearm wrist (HES and self-reported)                         | T | 379101 | 8702  | 370399 | 0.932    | -0.070292 | 0.583756 | 0.297     | 2.93      | 0.904156 | 0.998648 |
| Musculoskeletal            | Fracture radius (HES and self-reported)                                | T | 379101 | 5082  | 374019 | 0.551    | -0.596001 | 1.00439  | 0.0769    | 3.95      | 0.552914 | 0.998648 |
| Musculoskeletal            | Fracture ulna (HES and self-reported)                                  | T | 379101 | 1643  | 377458 | 4.10E-05 | -10.1024  | 120.818  | 5.89E-108 | 2.85E+98  | 0.933361 | 0.998648 |
| Musculoskeletal            | Fracture wrist colles fracture (HES and self-reported)                 | T | 379101 | 3198  | 375903 | 1.6      | 0.470977  | 0.712271 | 0.396     | 6.47      | 0.508731 | 0.998648 |
| Musculoskeletal            | Fracture hand (HES and self-reported)                                  | T | 379101 | 1148  | 377953 | 5.65E-05 | -9.7804   | 120.434  | 1.73E-107 | 1.85E+98  | 0.935275 | 0.998648 |
| Musculoskeletal            | Fracture finger (HES and self-reported)                                | T | 379101 | 1578  | 377523 | 1.58     | 0.457334  | 1.00456  | 0.221     | 11.3      | 0.648922 | 0.998648 |
| Musculoskeletal            | Fracture thumb (HES and self-reported)                                 | T | 379101 | 379   | 378722 | 6.12E-05 | -9.70113  | 196.495  | 3.36E-172 | 1.11E+163 | 0.960624 | 0.998648 |
| Musculoskeletal            | Fracture rib (HES and self-reported)                                   | T | 379101 | 2085  | 377016 | 8.41E-05 | -9.38311  | 72.7599  | 1.40E-66  | 5.04E+57  | 0.897131 | 0.998648 |
| Musculoskeletal            | Fracture sternum (HES and self-reported                                |   |        |       |        |          |           |          |           |           |          |          |

|                            |                                                |   |        |       |        |       |           |          |           |          |          |          |
|----------------------------|------------------------------------------------|---|--------|-------|--------|-------|-----------|----------|-----------|----------|----------|----------|
| Musculoskeletal            | Osteoarthritis knee                            | T | 330411 | 18217 | 312194 | 0.716 | -0.333397 | 0.458885 | 0.291     | 1.76     | 0.46751  | 0.998648 |
| Musculoskeletal            | Osteoarthritis knee or hip                     | T | 339616 | 27422 | 312194 | 0.958 | -0.043051 | 0.333117 | 0.499     | 1.84     | 0.897171 | 0.998648 |
| Musculoskeletal            | Osteoarthritis non load bearing joints         | T | 317066 | 4872  | 312194 | 0.551 | -0.595158 | 1.00542  | 0.0769    | 3.96     | 0.553886 | 0.998648 |
| Musculoskeletal            | BIN combinedFractures                          | T | 379101 | 28020 | 351081 | 1.14  | 0.131443  | 0.301862 | 0.631     | 2.06     | 0.663244 | 0.998648 |
| Cardiovascular             | Pulse minimumValue                             | T | 357246 | NA    | NA     | NA    | 0.039048  | 0.085729 | -0.128981 | 0.207077 | 0.64876  | 0.998648 |
| Other                      | Sleep duration                                 | T | 376797 | NA    | NA     | NA    | 0.016664  | 0.083626 | -0.147244 | 0.180572 | 0.842051 | 0.998648 |
| Other                      | Sleeplessness insomnia                         | T | 378601 | NA    | NA     | NA    | 0.088665  | 0.083279 | -0.074561 | 0.251891 | 0.287021 | 0.998648 |
| Other                      | Daytime dozing sleeping narcolepsy             | T | 377552 | NA    | NA     | NA    | -0.044199 | 0.083158 | -0.207189 | 0.118792 | 0.595072 | 0.998648 |
| Cardiovascular             | Ventricular rate                               | T | 8941   | NA    | NA     | NA    | 0.600039  | 0.999205 | -1.3584   | 2.55848  | 0.548162 | 0.998648 |
| Cardiovascular             | P duration                                     | T | 8939   | NA    | NA     | NA    | 0.34455   | 0.99973  | -1.61492  | 2.30402  | 0.730363 | 0.998648 |
| Cardiovascular             | QRS duration                                   | T | 8939   | NA    | NA     | NA    | -0.169224 | 0.999064 | -2.12739  | 1.78894  | 0.865495 | 0.998648 |
| Cardiovascular             | Cardiac index during PWA                       | T | 8000   | NA    | NA     | NA    | 0.455614  | 0.999219 | -1.50286  | 2.41408  | 0.648411 | 0.998648 |
| Summary                    | Number of self reported non cancer illnesses   | T | 379040 | NA    | NA     | NA    | 0.099992  | 0.083256 | -0.063191 | 0.263174 | 0.229747 | 0.998648 |
| Summary                    | Number of operations self reported             | T | 379040 | NA    | NA     | NA    | -0.029899 | 0.083296 | -0.193159 | 0.133362 | 0.71964  | 0.998648 |
| Summary                    | Number of treatments medications taken         | T | 379040 | NA    | NA     | NA    | 0.1075    | 0.083261 | -0.055692 | 0.270692 | 0.196662 | 0.998648 |
| Family history             | Father s age at death                          | T | 278550 | NA    | NA     | NA    | 0.082629  | 0.096508 | -0.106527 | 0.271784 | 0.391894 | 0.998648 |
| Other                      | Townsend deprivation index at recruitment      | T | 378649 | NA    | NA     | NA    | -0.085601 | 0.082809 | -0.247907 | 0.076705 | 0.301271 | 0.998648 |
| Neurosciences              | Fluid intelligence score                       | T | 184529 | NA    | NA     | NA    | 0.06482   | 0.112999 | -0.156658 | 0.286298 | 0.566218 | 0.998648 |
| Neurosciences              | Prospective memory result                      | T | 126279 | NA    | NA     | NA    | -0.075415 | 0.124417 | -0.319272 | 0.168443 | 0.544417 | 0.998648 |
| ENT                        | Speech reception threshold SRT estimate left   | T | 114702 | NA    | NA     | NA    | 0.063039  | 0.130992 | -0.193706 | 0.319783 | 0.630345 | 0.998648 |
| ENT                        | Speech reception threshold SRT estimate right  | T | 114815 | NA    | NA     | NA    | 0.08644   | 0.130951 | -0.170224 | 0.343104 | 0.509194 | 0.998648 |
| Neurosciences              | Mean time to correctly identify matches        | T | 376457 | NA    | NA     | NA    | 0.037894  | 0.083199 | -0.125176 | 0.200963 | 0.648776 | 0.998648 |
| Family history             | Alzheimer s disease dementia (family history)  | T | 379101 | NA    | NA     | NA    | -0.012237 | 0.08306  | -0.175034 | 0.150561 | 0.882877 | 0.998648 |
| Family history             | Parkinson s disease (family history)           | T | 379101 | NA    | NA     | NA    | 0.002697  | 0.083009 | -0.160001 | 0.165395 | 0.974083 | 0.998648 |
| Family history             | Severe depression (family history)             | T | 379101 | NA    | NA     | NA    | 0.036018  | 0.083117 | -0.126891 | 0.198926 | 0.664769 | 0.998648 |
| Family history             | Prostate cancer (family history)               | T | 174719 | NA    | NA     | NA    | -0.049833 | 0.116354 | -0.277887 | 0.178221 | 0.668441 | 0.998648 |
| Family history             | Heart disease (family history)                 | T | 379101 | NA    | NA     | NA    | -0.112069 | 0.083269 | -0.275276 | 0.051138 | 0.178346 | 0.998648 |
| Family history             | Stroke (family history)                        | T | 379101 | NA    | NA     | NA    | 0.075186  | 0.083158 | -0.087804 | 0.238176 | 0.365925 | 0.998648 |
| Family history             | Lung cancer (family history)                   | T | 379101 | NA    | NA     | NA    | 0.044111  | 0.083151 | -0.118865 | 0.207088 | 0.59577  | 0.998648 |
| Family history             | Bowel cancer (family history)                  | T | 379101 | NA    | NA     | NA    | 0.071277  | 0.082994 | -0.091391 | 0.233944 | 0.390438 | 0.998648 |
| Family history             | Diabetes (family history)                      | T | 379101 | NA    | NA     | NA    | 0.004499  | 0.083122 | -0.15842  | 0.167417 | 0.95684  | 0.998648 |
| Mental health              | Neuroticism score                              | T | 307275 | NA    | NA     | NA    | -0.115042 | 0.090906 | -0.293218 | 0.063134 | 0.205689 | 0.998648 |
| Neurosciences              | Number of incorrect matches in round           | T | 93587  | NA    | NA     | NA    | -0.028184 | 0.157776 | -0.337424 | 0.281057 | 0.858228 | 0.998648 |
| Anthropometry              | Weight                                         | T | 377979 | NA    | NA     | NA    | -0.006043 | 0.083308 | -0.169327 | 0.157241 | 0.942175 | 0.998648 |
| Cardiovascular             | Pulse wave Arterial Stiffness index            | T | 124962 | NA    | NA     | NA    | 0.106462  | 0.128009 | -0.144436 | 0.35736  | 0.405593 | 0.998648 |
| Musculoskeletal            | Falls in the last year                         | T | 378169 | NA    | NA     | NA    | -0.02979  | 0.083366 | -0.193186 | 0.133606 | 0.720836 | 0.998648 |
| Anthropometry              | Body fat percentage                            | T | 372255 | NA    | NA     | NA    | 0.101278  | 0.084023 | -0.063408 | 0.265963 | 0.228067 | 0.998648 |
| Anthropometry              | Whole body fat mass                            | T | 371851 | NA    | NA     | NA    | 0.054896  | 0.084159 | -0.110056 | 0.219849 | 0.514214 | 0.998648 |
| Anthropometry              | Whole body fat free mass                       | T | 372439 | NA    | NA     | NA    | -0.067157 | 0.083966 | -0.23173  | 0.097416 | 0.423818 | 0.998648 |
| Anthropometry              | Whole body water mass                          | T | 372469 | NA    | NA     | NA    | -0.066664 | 0.083968 | -0.231242 | 0.097914 | 0.427243 | 0.998648 |
| Other                      | Relative age of first facial hair              | T | 168858 | NA    | NA     | NA    | -0.025601 | 0.117591 | -0.256079 | 0.204877 | 0.827653 | 0.998648 |
| Other                      | Relative age voice broke                       | T | 161623 | NA    | NA     | NA    | -0.152158 | 0.120248 | -0.387844 | 0.083528 | 0.20574  | 0.998648 |
| Other                      | Age when periods started menarche              | T | 198489 | NA    | NA     | NA    | 0.154358  | 0.121206 | -0.083206 | 0.391922 | 0.202834 | 0.998648 |
| Biological assays          | Mean corpuscular volume                        | T | 367861 | NA    | NA     | NA    | 0.116624  | 0.084018 | -0.048051 | 0.281298 | 0.165111 | 0.998648 |
| Biological assays          | Mean corpuscular haemoglobin concentration     | T | 367856 | NA    | NA     | NA    | 0.032247  | 0.084169 | -0.132724 | 0.197218 | 0.70163  | 0.998648 |
| Biological assays          | Red blood cell erythrocyte distribution width  | T | 367861 | NA    | NA     | NA    | 0.039736  | 0.084211 | -0.125318 | 0.20479  | 0.637027 | 0.998648 |
| Biological assays          | Mean platelet thrombocyte volume               | T | 367857 | NA    | NA     | NA    | 0.081997  | 0.084223 | -0.083079 | 0.247073 | 0.330269 | 0.998648 |
| Biological assays          | Platelet distribution width                    | T | 367857 | NA    | NA     | NA    | 0.039537  | 0.084213 | -0.125521 | 0.204595 | 0.63872  | 0.998648 |
| Biological assays          | Monocyte count                                 | T | 367207 | NA    | NA     | NA    | 0.107667  | 0.0845   | -0.057953 | 0.273287 | 0.202605 | 0.998648 |
| Biological assays          | Neutrophil count                               | T | 367207 | NA    | NA     | NA    | -0.103445 | 0.0845   | -0.269066 | 0.062176 | 0.220879 | 0.998648 |
| Biological assays          | Eosinophil count                               | T | 367207 | NA    | NA     | NA    | -0.042054 | 0.084486 | -0.207646 | 0.123538 | 0.618649 | 0.998648 |
| Biological assays          | Basophil count                                 | T | 367207 | NA    | NA     | NA    | -0.053479 | 0.084186 | -0.218484 | 0.111527 | 0.525271 | 0.998648 |
| Biological assays          | Nucleated red blood cell count                 | T | 367198 | NA    | NA     | NA    | 0.108471  | 0.084246 | -0.056651 | 0.273593 | 0.197902 | 0.998648 |
| Biological assays          | Lymphocyte percentage                          | T | 367213 | NA    | NA     | NA    | -0.10878  | 0.084522 | -0.274443 | 0.056883 | 0.198094 | 0.998648 |
| Biological assays          | Neutrophil percentage                          | T | 367213 | NA    | NA     | NA    | 0.029618  | 0.084519 | -0.136039 | 0.195276 | 0.726013 | 0.998648 |
| Biological assays          | Eosinophil percentage                          | T | 367213 | NA    | NA     | NA    | 0.020165  | 0.084508 | -0.145471 | 0.1858   | 0.811405 | 0.998648 |
| Biological assays          | Basophil percentage                            | T | 367213 | NA    | NA     | NA    | -0.110111 | 0.084511 | -0.275752 | 0.05553  | 0.192604 | 0.998648 |
| Biological assays          | Nucleated red blood cell percentage            | T | 367195 | NA    | NA     | NA    | 0.111997  | 0.084246 | -0.053125 | 0.277119 | 0.183711 | 0.998648 |
| Biological assays          | Creatinine enzymatic in urine                  | T | 368234 | NA    | NA     | NA    | -0.094377 | 0.08508  | -0.261134 | 0.072379 | 0.267309 | 0.998648 |
| Biological assays          | Potassium in urine                             | T | 367438 | NA    | NA     | NA    | -0.116307 | 0.085105 | -0.283113 | 0.050499 | 0.171743 | 0.998648 |
| Biological assays          | Sodium in urine                                | T | 367460 | NA    | NA     | NA    | -0.068134 | 0.085005 | -0.234743 | 0.098476 | 0.422828 | 0.998648 |
| Respiratory                | FVC maximumValue                               | T | 286167 | NA    | NA     | NA    | -0.117711 | 0.09821  | -0.310203 | 0.074781 | 0.230697 | 0.998648 |
| Respiratory                | FVC maximumValue strict                        | T | 221665 | NA    | NA     | NA    | -0.100342 | 0.110732 | -0.317377 | 0.116693 | 0.364846 | 0.998648 |
| Family history             | Mother s age at death                          | T | 223081 | NA    | NA     | NA    | -0.030213 | 0.104161 | -0.234369 | 0.173942 | 0.771767 | 0.998648 |
| Gynaecology and Obstetrics | Age started hormone replacement therapy HRT    | T | 71387  | NA    | NA     | NA    | -0.02596  | 0.20843  | -0.434483 | 0.382563 | 0.90088  | 0.998648 |
| Gynaecology and Obstetrics | Age at menopause last menstrual period         | T | 116962 | NA    | NA     | NA    | 0.159462  | 0.154064 | -0.142503 | 0.461427 | 0.30065  | 0.998648 |
| Neurosciences              | Incurrect matches summed                       | T | 379101 | NA    | NA     | NA    | -0.051901 | 0.083239 | -0.215049 | 0.111247 | 0.532942 | 0.998648 |
| Cancer                     | Reported occurrences of cancer                 | T | 61110  | NA    | NA     | NA    | 0.131772  | 0.213688 | -0.287056 | 0.5506   | 0.53746  | 0.998648 |
| Cardiovascular             | Systolic blood pressure mean                   | T | 357243 | NA    | NA     | NA    | -0.028394 | 0.085724 | -0.196412 | 0.139624 | 0.740474 | 0.998648 |
| Neurosciences              | Maximum digits remembered correctly            | T | 116653 | NA    | NA     | NA    | -0.024217 | 0.136049 | -0.290873 | 0.242439 | 0.858722 | 0.998648 |
| Mental health              | Happiness                                      | T | 126053 | NA    | NA     | NA    | 0.069017  | 0.125023 | -0.176028 | 0.314062 | 0.580926 | 0.998648 |
| Anthropometry              | Waist circumference                            | T | 378432 | NA    | NA     | NA    | 0.002993  | 0.083315 | -0.160304 | 0.16629  | 0.971341 | 0.998648 |
| Anthropometry              | Hip circumference                              | T | 378389 | NA    | NA     | NA    | 0.06803   | 0.083305 | -0.095248 | 0.231308 | 0.414135 | 0.998648 |
| Eye                        | LogMAR final left                              | T | 83967  | NA    | NA     | NA    | -0.198471 | 0.168868 | -0.529452 | 0.13251  | 0.239873 | 0.998648 |
| Eye                        | Corneal hysteresis right                       | T | 81176  | NA    | NA     | NA    | 0.019504  | 0.168939 | -0.311617 | 0.350624 | 0.908091 | 0.998648 |
| Eye                        | Corneal resistance factor right                | T | 81176  | NA    | NA     | NA    | -0.130219 | 0.168999 | -0.461457 | 0.201019 | 0.440983 | 0.998648 |
| Eye                        | Intra ocular pressure corneal compensated left | T | 81056  | NA    | NA     | NA    | -0.225632 | 0.169022 | -0.556915 | 0.105651 | 0.181899 | 0.998648 |
| Eye                        | Corneal hysteresis left                        | T | 81056  | NA    | NA     | NA    | -0.028389 | 0.169003 | -0.359634 | 0.302857 | 0.866601 | 0.998648 |
| Eye                        | Corneal resistance factor left                 | T | 81056  | NA    | NA     | NA    | -0.167155 | 0.169039 | -0.498471 | 0.164161 | 0.322736 | 0.998648 |
| Other                      | Overall acceleration average                   | T | 81471  | NA    | NA     | NA    | -0.031229 | 0.164351 | -0.353357 | 0.290899 | 0.849297 | 0.998648 |
| Respiratory                | FEV1 never smoked only                         | T | 109851 | NA    | NA     | NA    | -0.173301 | 0.147134 | -0.461684 | 0.115082 | 0.238859 | 0.998648 |
| ENT                        | Hear loss B                                    | T | 121038 | NA    | NA     | NA    | 0.079169  | 0.127626 | -0.170978 | 0.329316 | 0.535047 | 0.998648 |
| Other                      | NumCigarettes                                  | T | 111875 | NA    | NA     | NA    | -0.159316 | 0.195939 | -0.543356 | 0.224724 | 0.416165 | 0.998648 |
| Biological assays          | Urine albumin creatinine ratio                 | T | 114295 | NA    | NA     | NA    | -0.058277 | 0.138632 | -0.329996 | 0.213442 | 0.674213 | 0.998648 |

Ordered by FDR. The category "Summary" indicates cases were anyone with admission for any code in the block. \* Lung function measures described as "strict" only include individuals with passed-QC spirometry (see reference 16 in the main
